# Supplementary material for: Neuroblastoma patient‐derived cultures are enriched for a mesenchymal gene signature and reflect individual drug response
Source: PubMed Central journal article supplement — Cancer Sci. 2020 Aug 28;111(10):3780–92. doi: 10.1111/cas.14610 (PMC7540996; doi:10.1111/cas.14610), 2020-08-28

There are no controls in this selection

KD-16-2148\_A2\_Sample\_20190311\_121430.fsa KD-16-2148 PowerPlex\_21\_POP1\_I

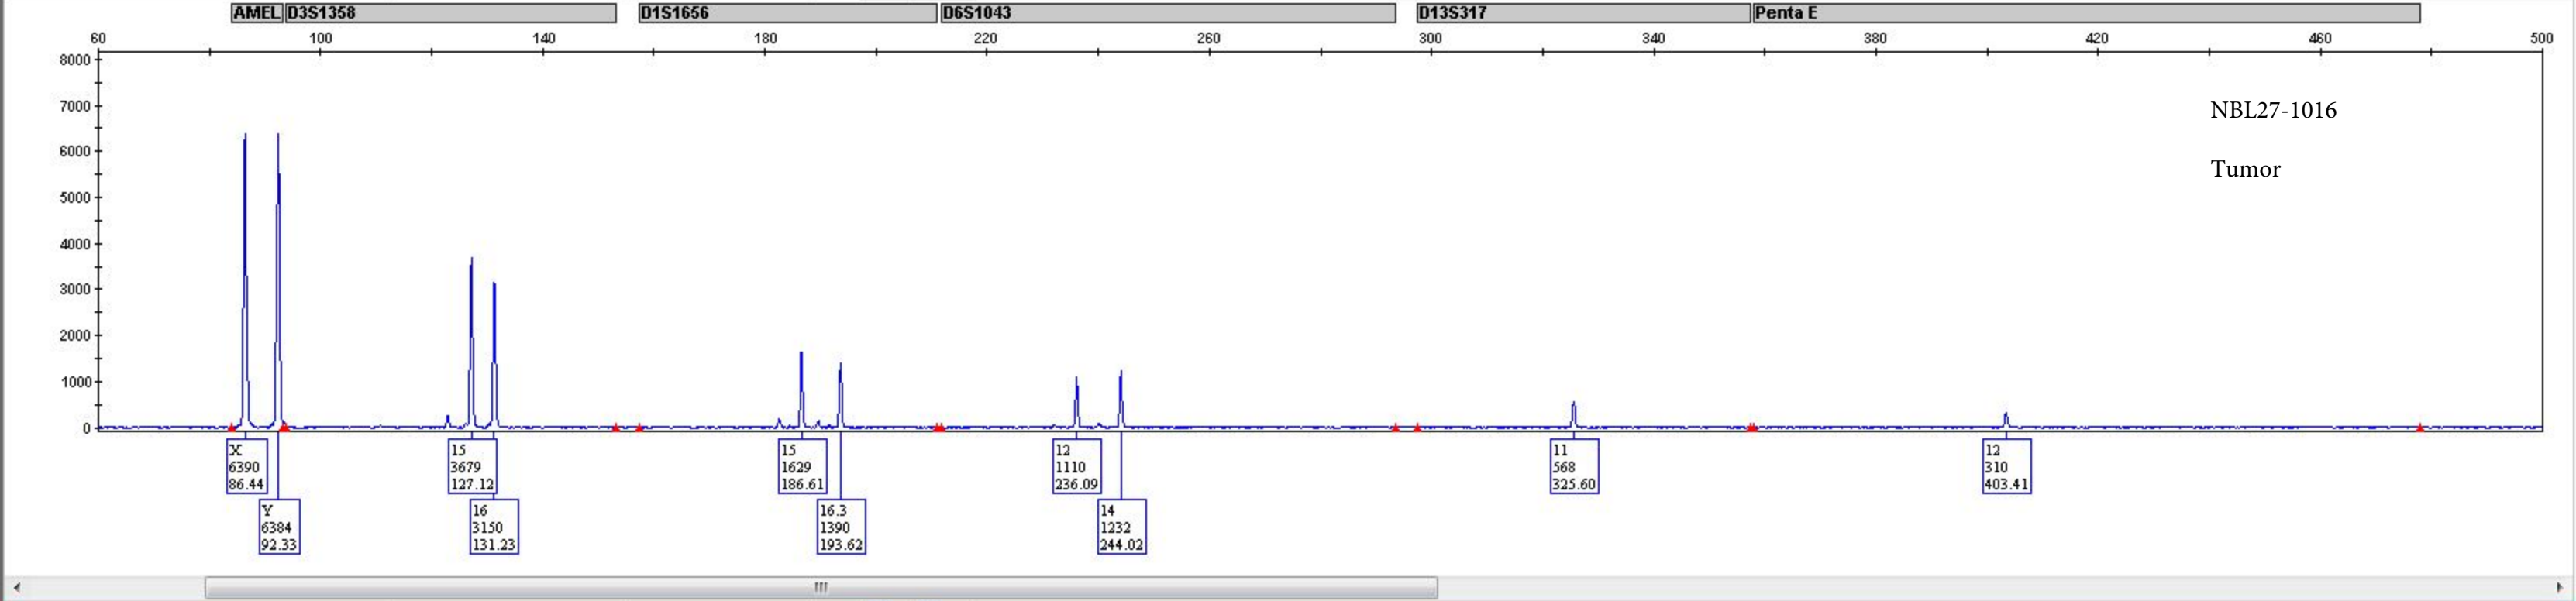

CL-27-1016\_B2\_Sample\_20190311\_121431.fsa CL-27-1016 PowerPlex\_21\_POP1\_I

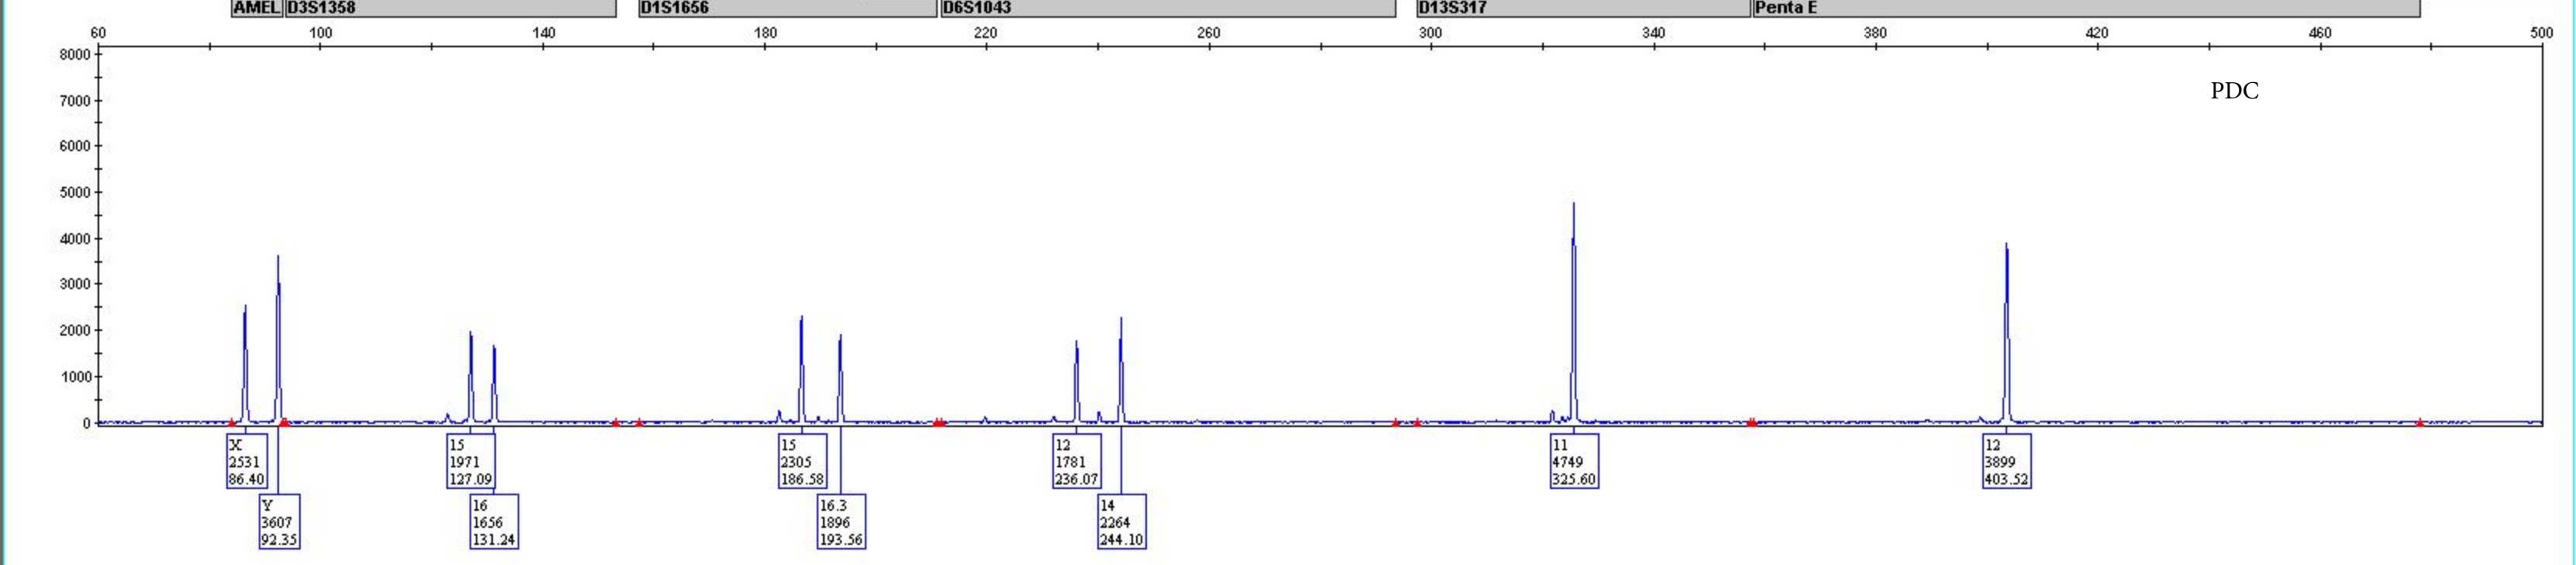

There are no controls in this selection

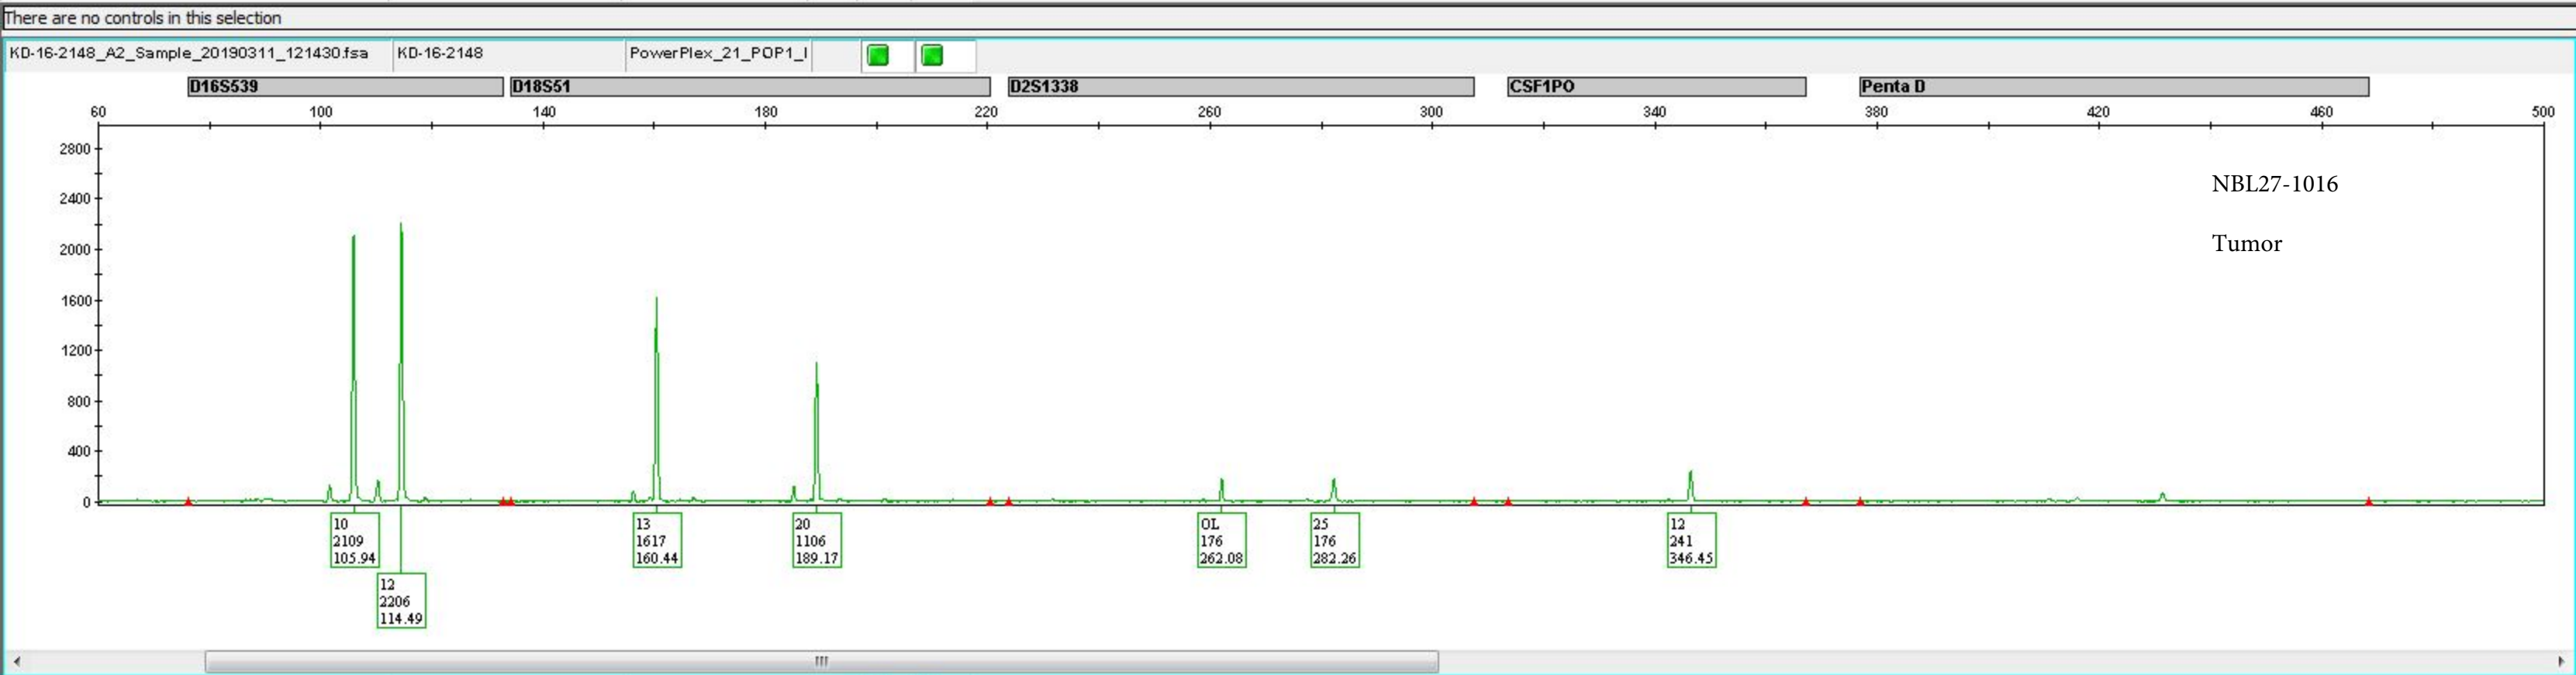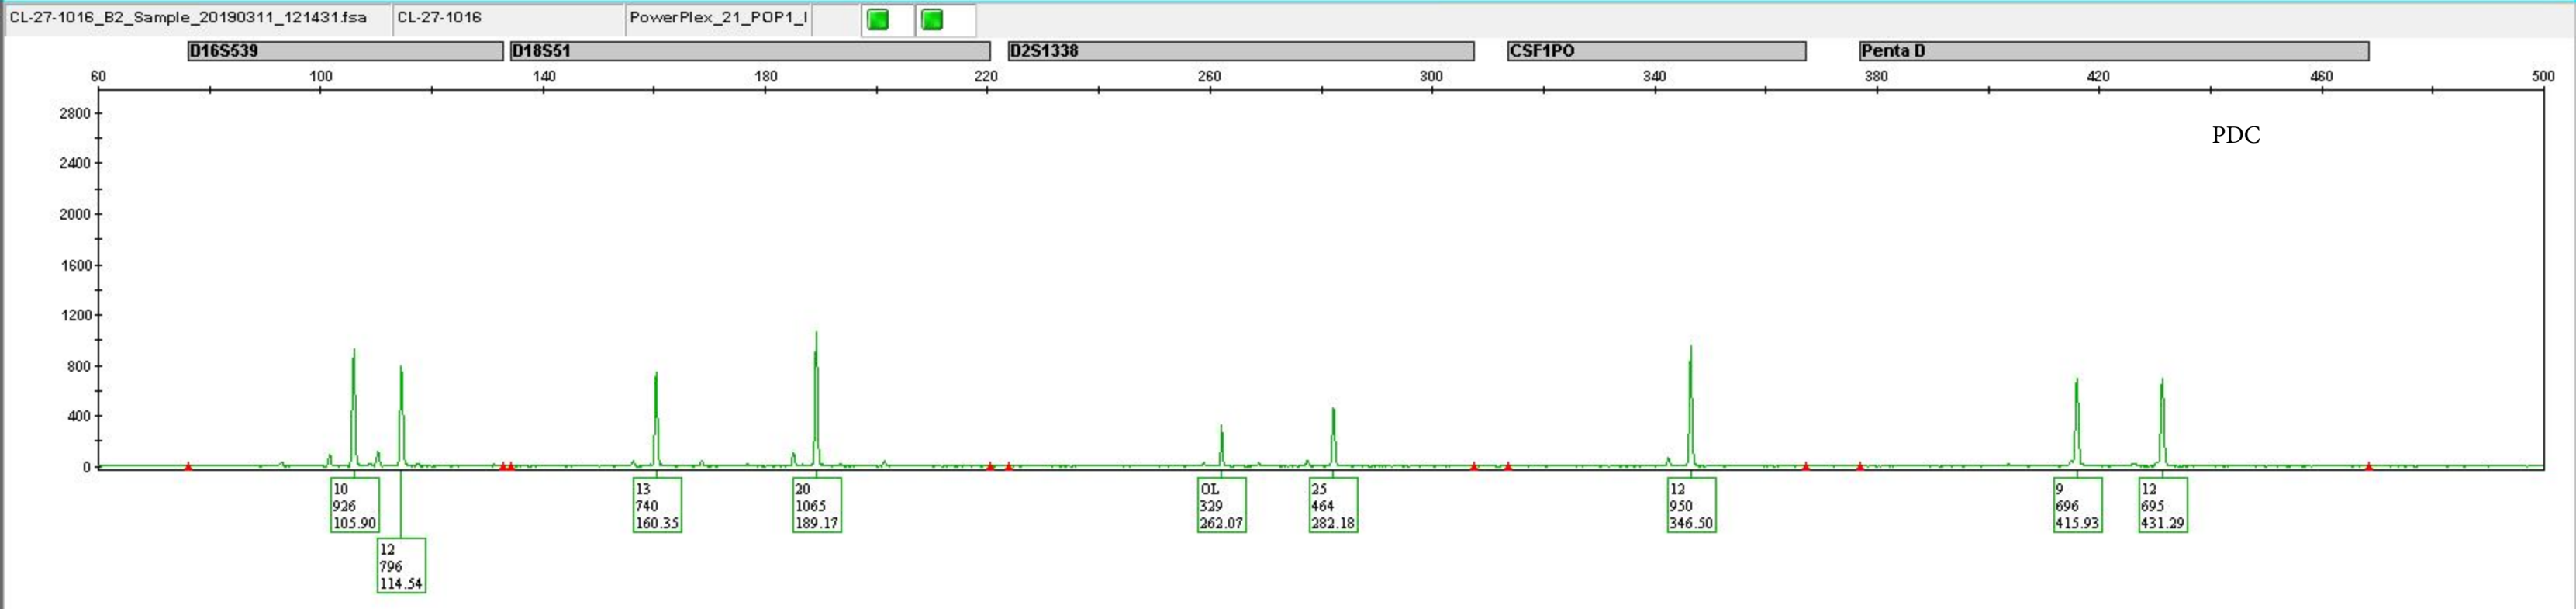

There are no controls in this selection

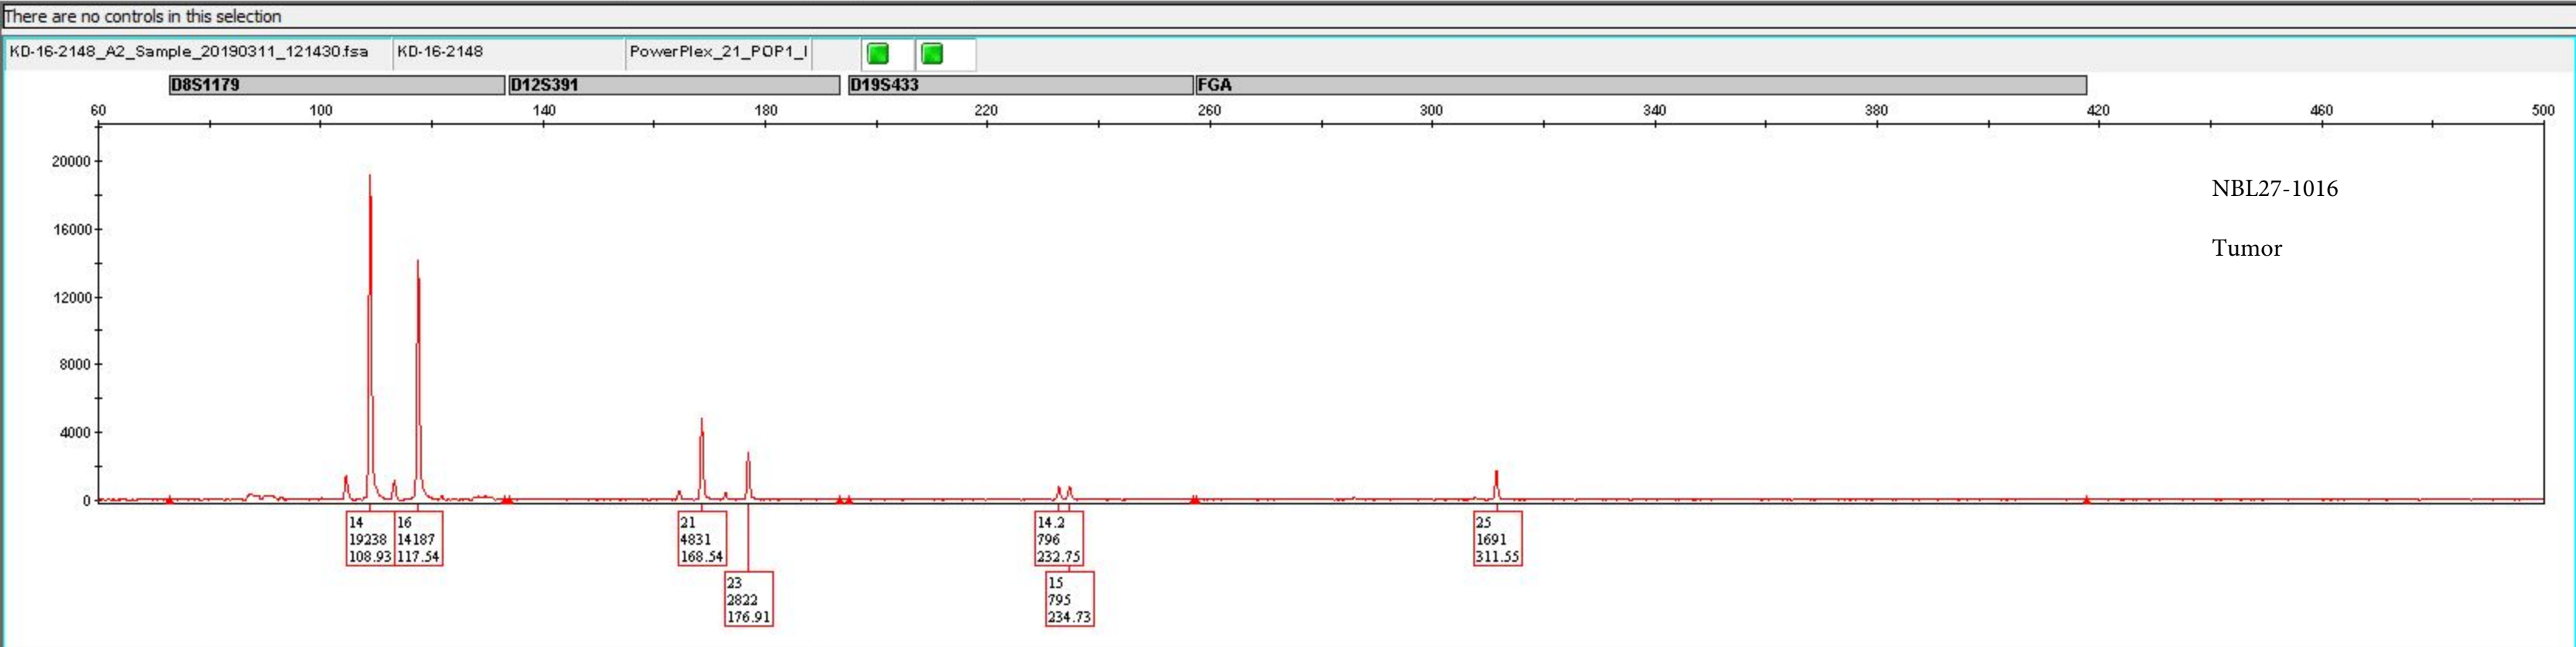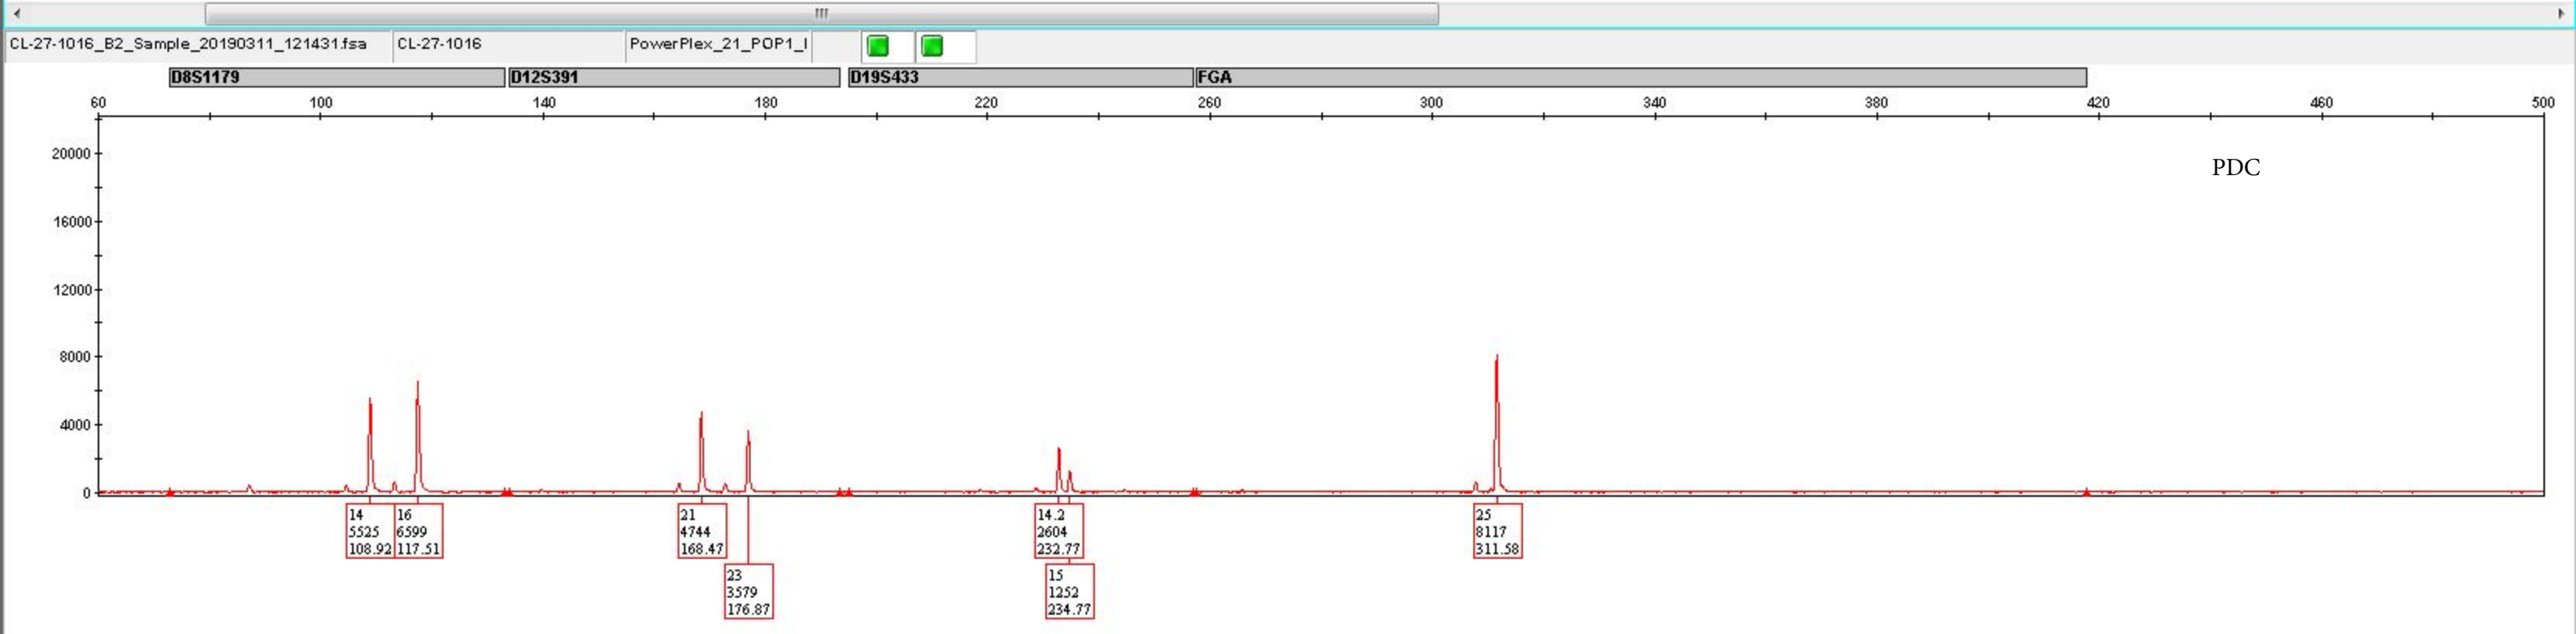

There are no controls in this selection

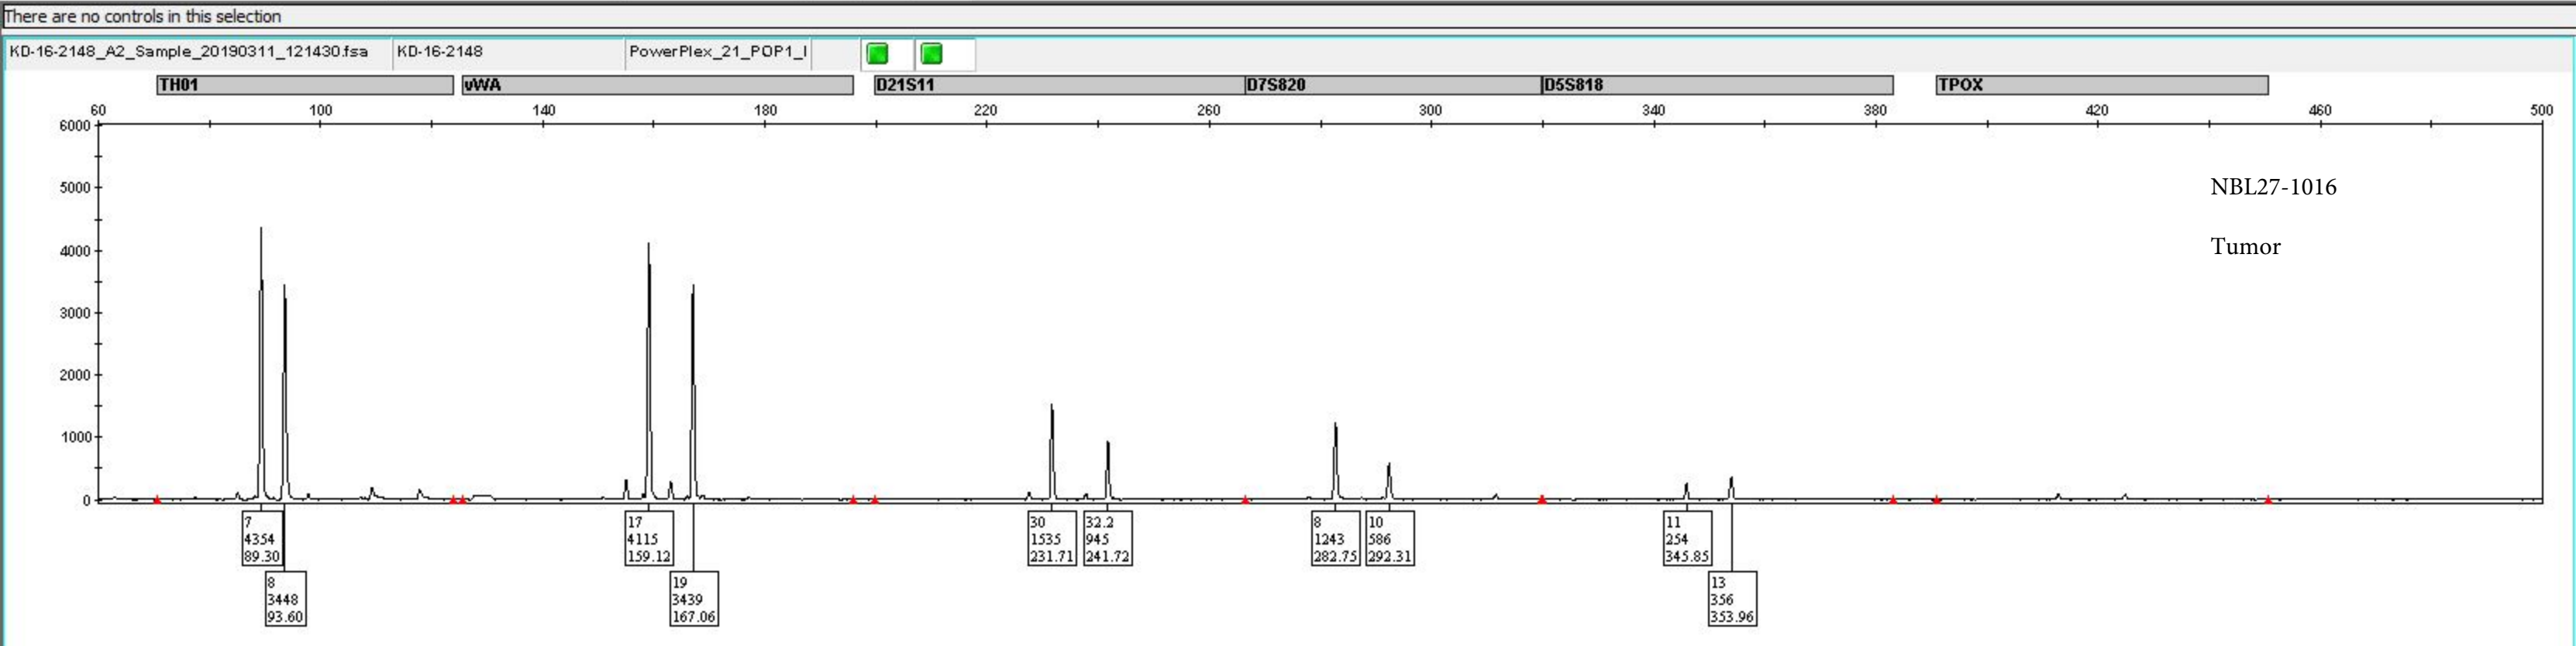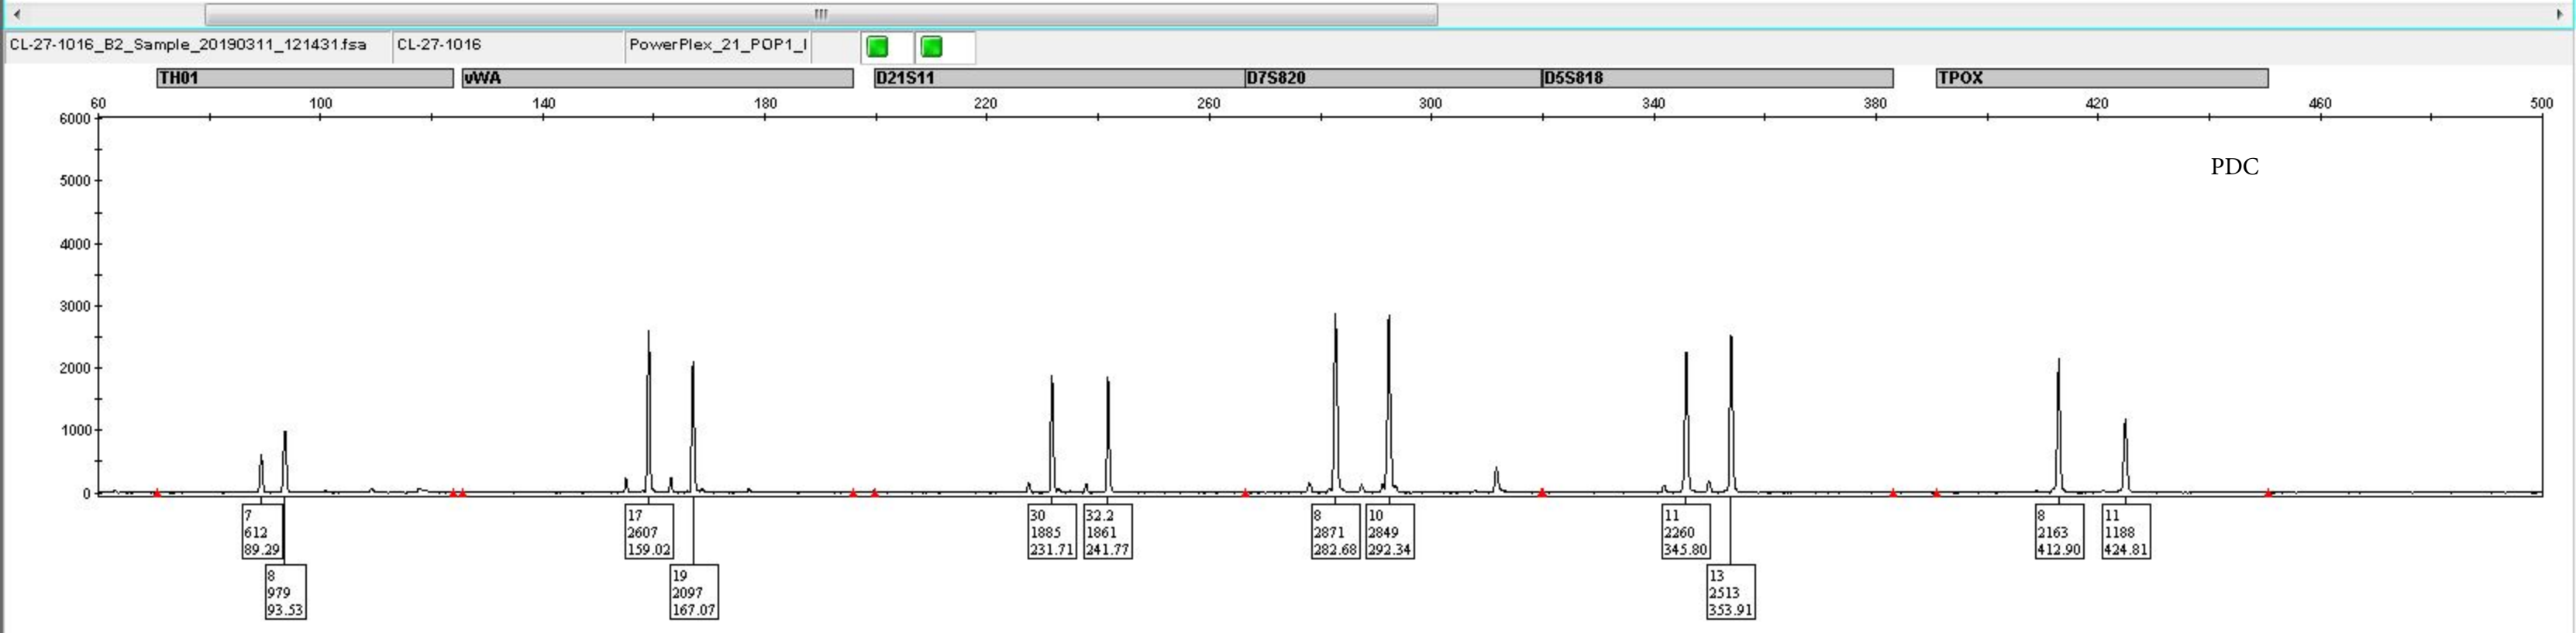

There are no controls in this selection

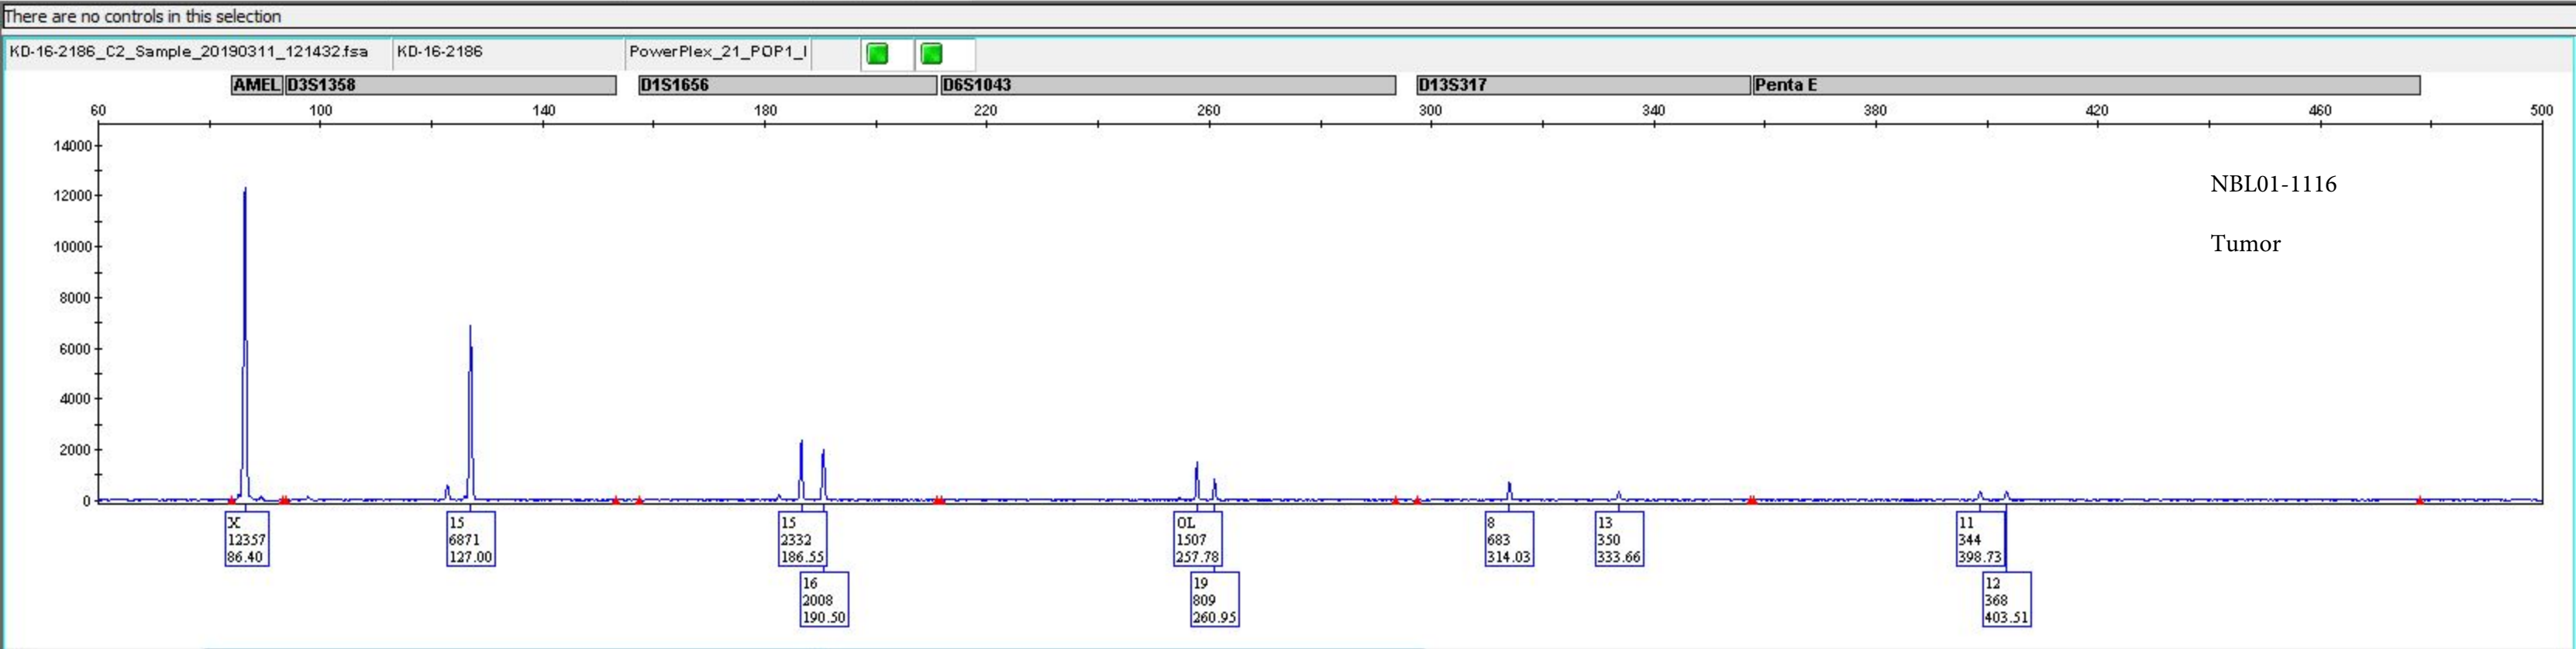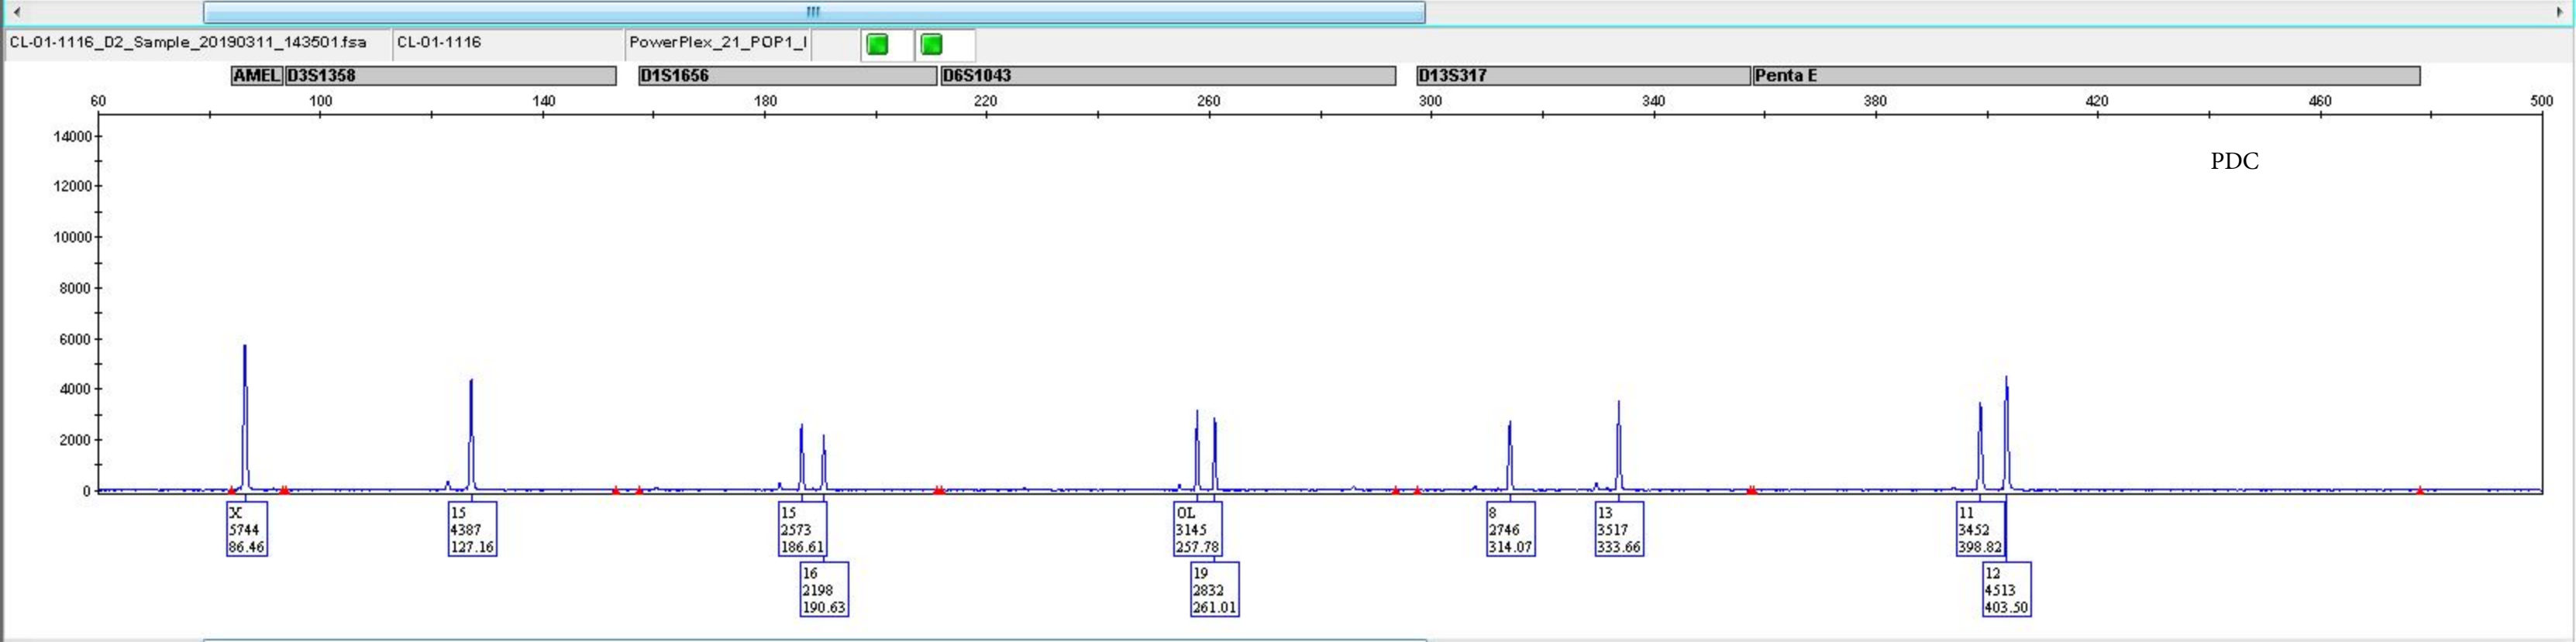

There are no controls in this selection

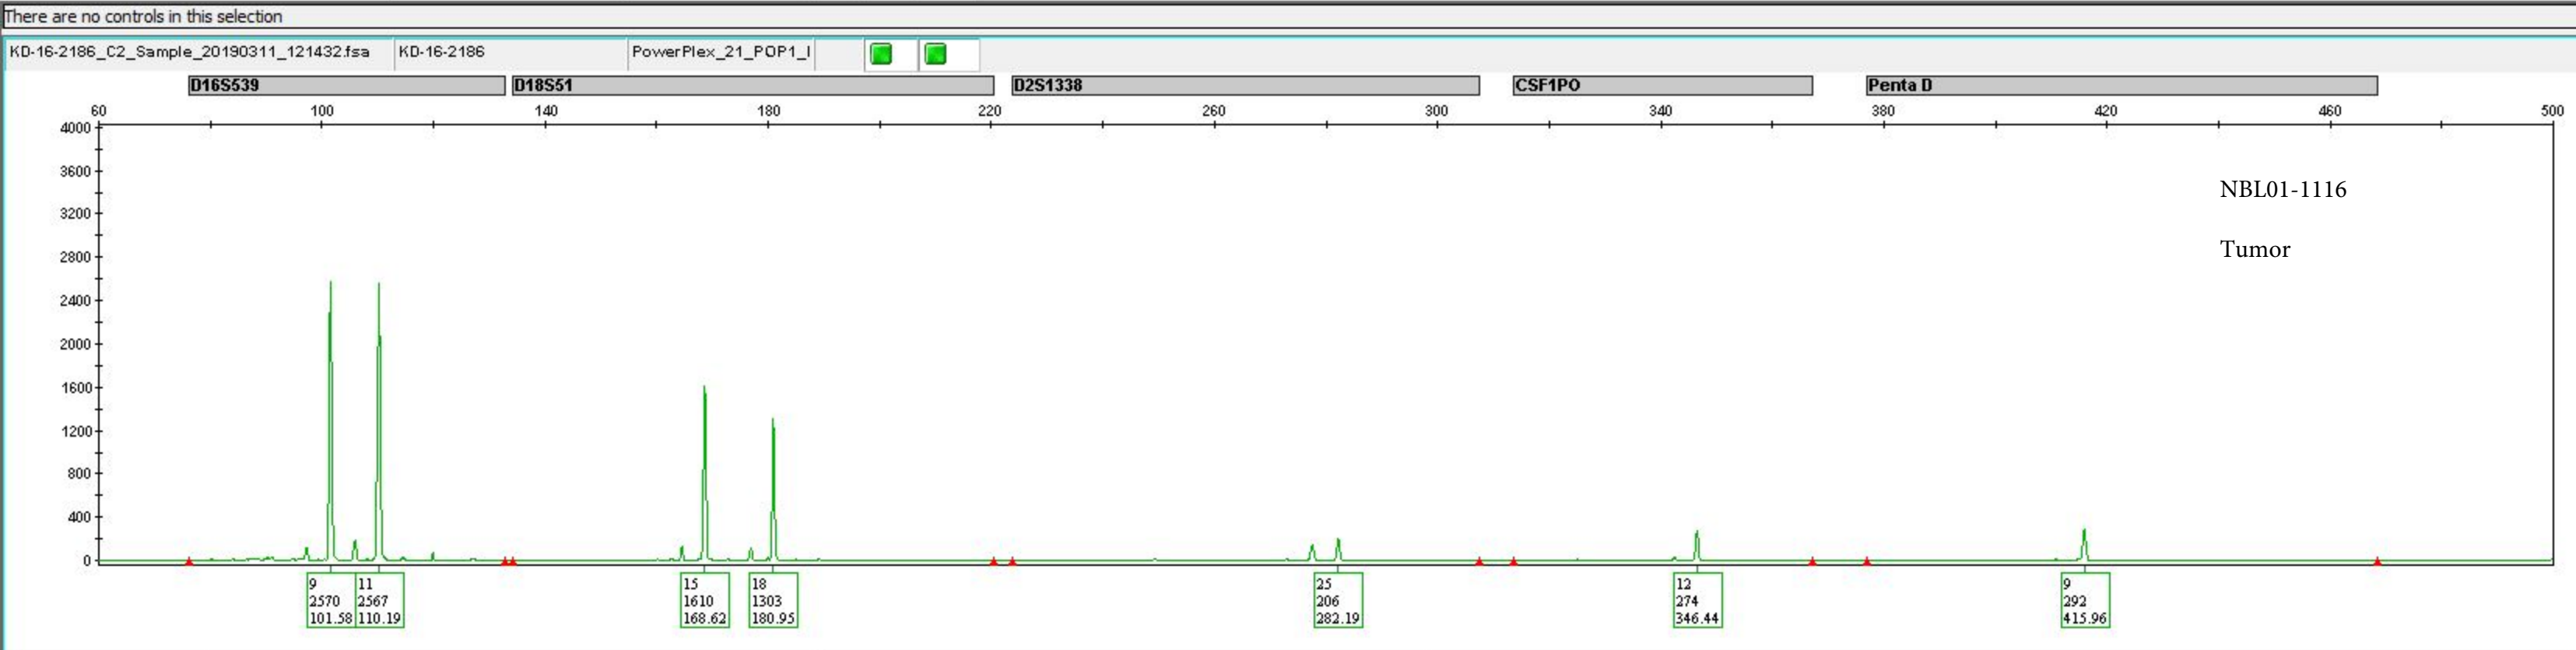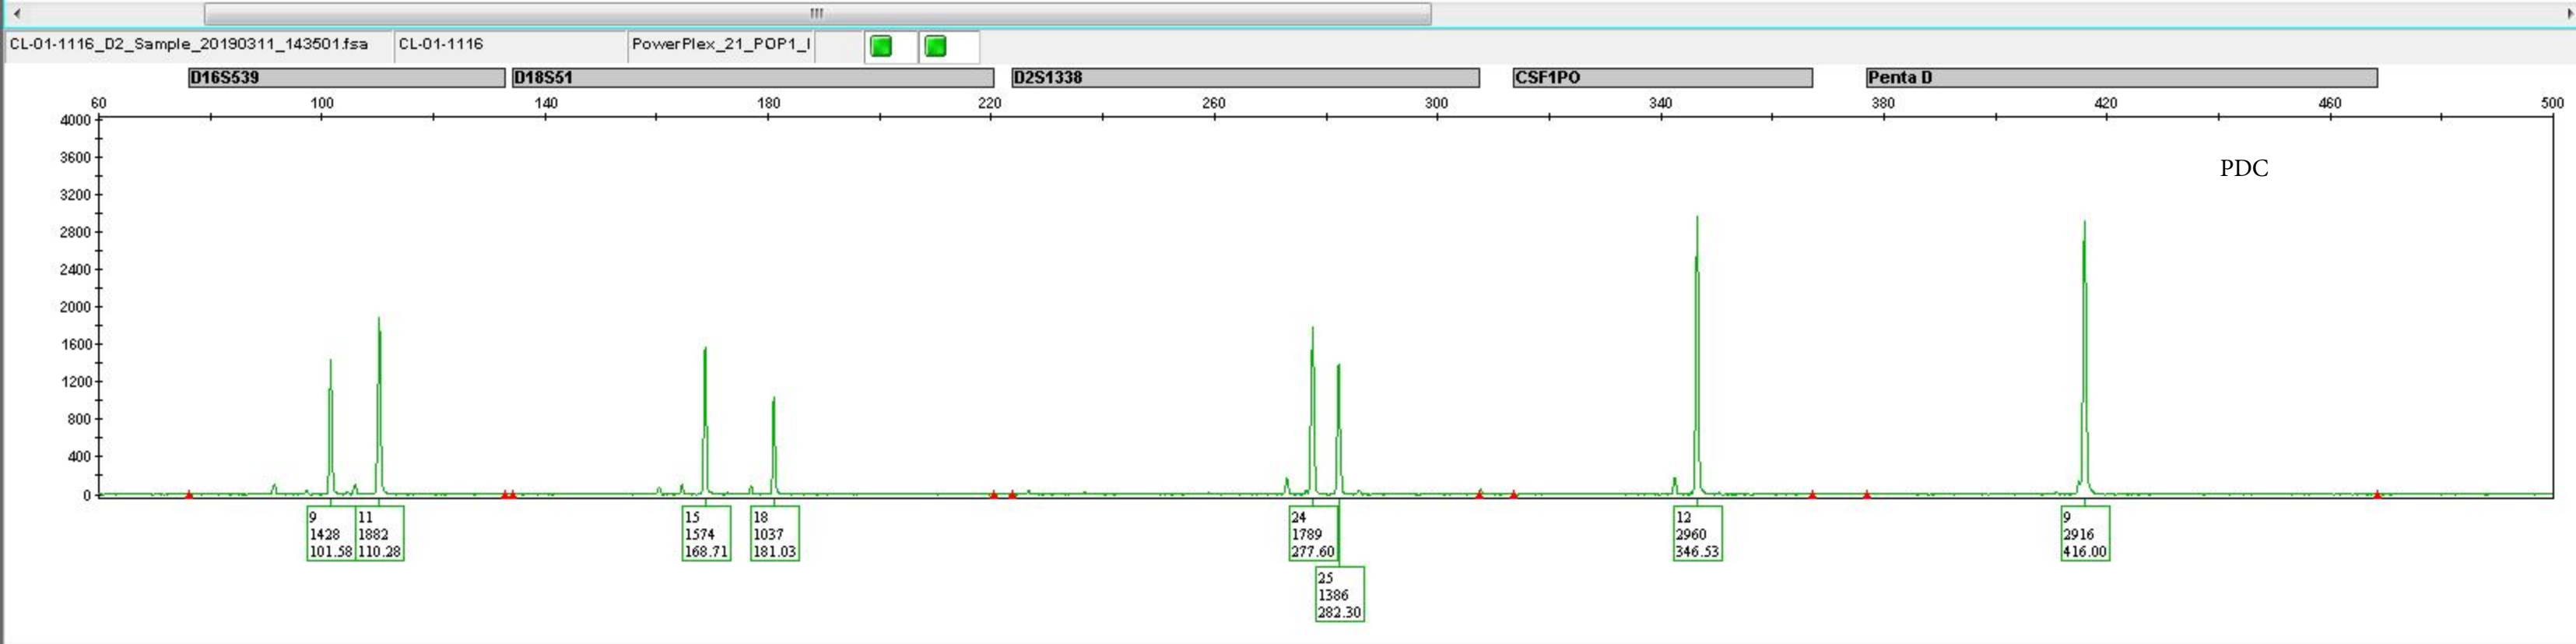

There are no controls in this selection

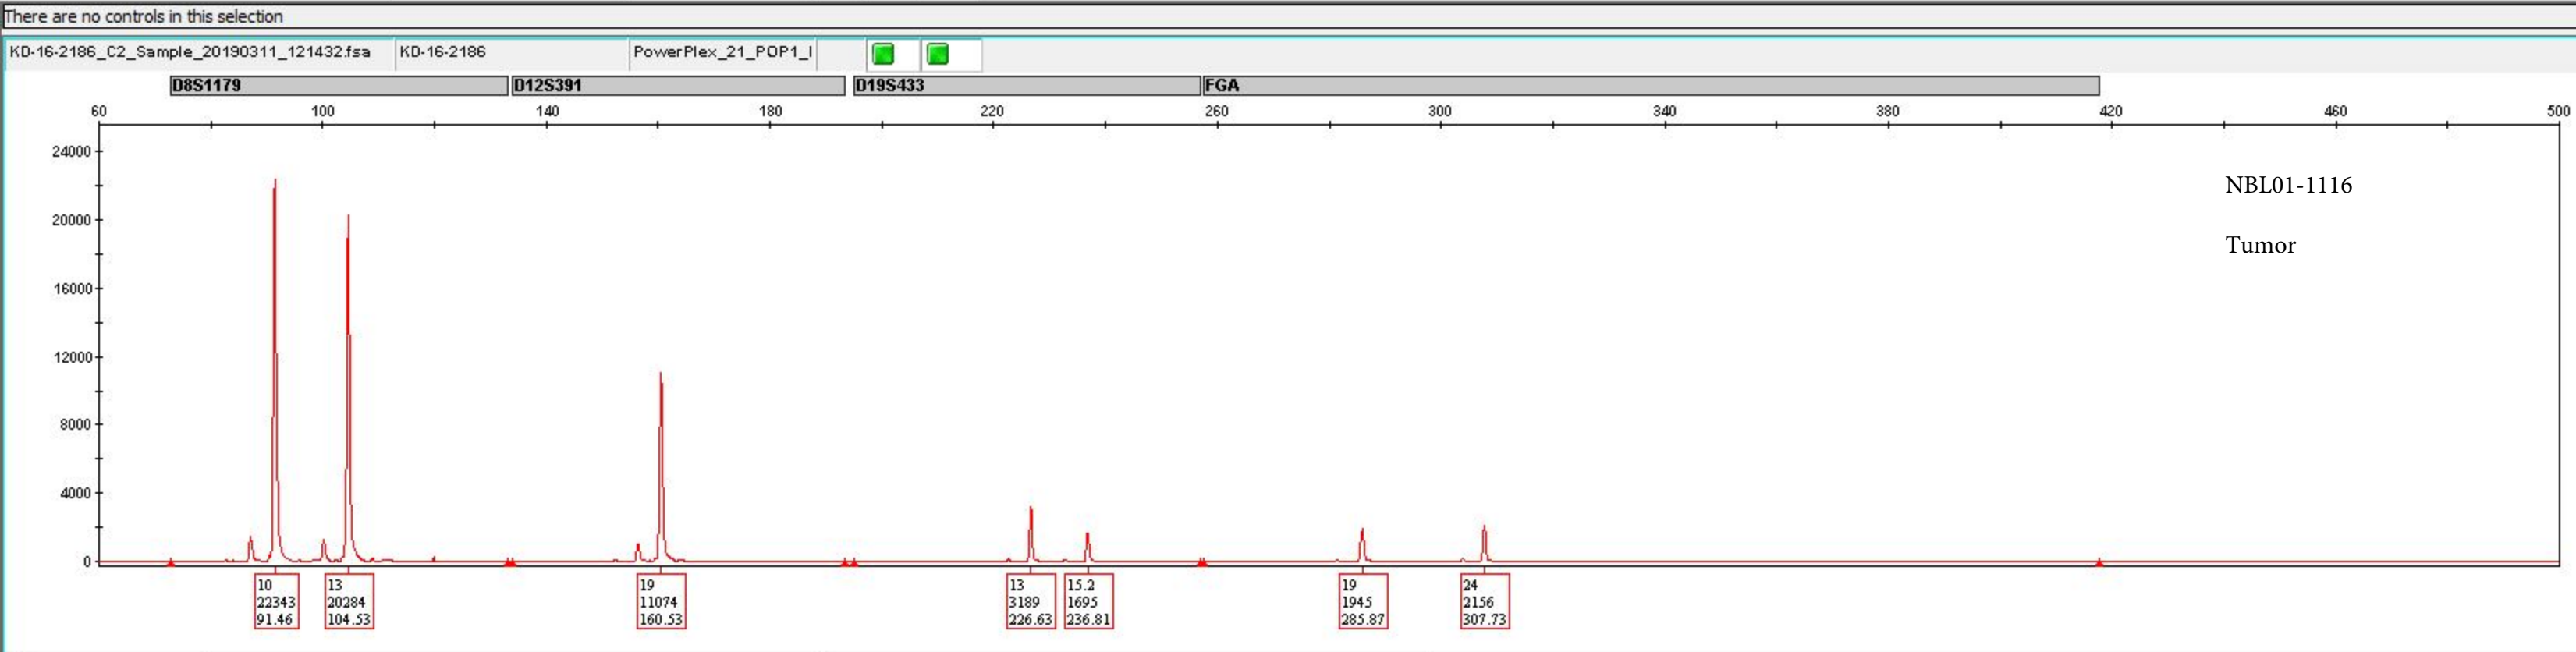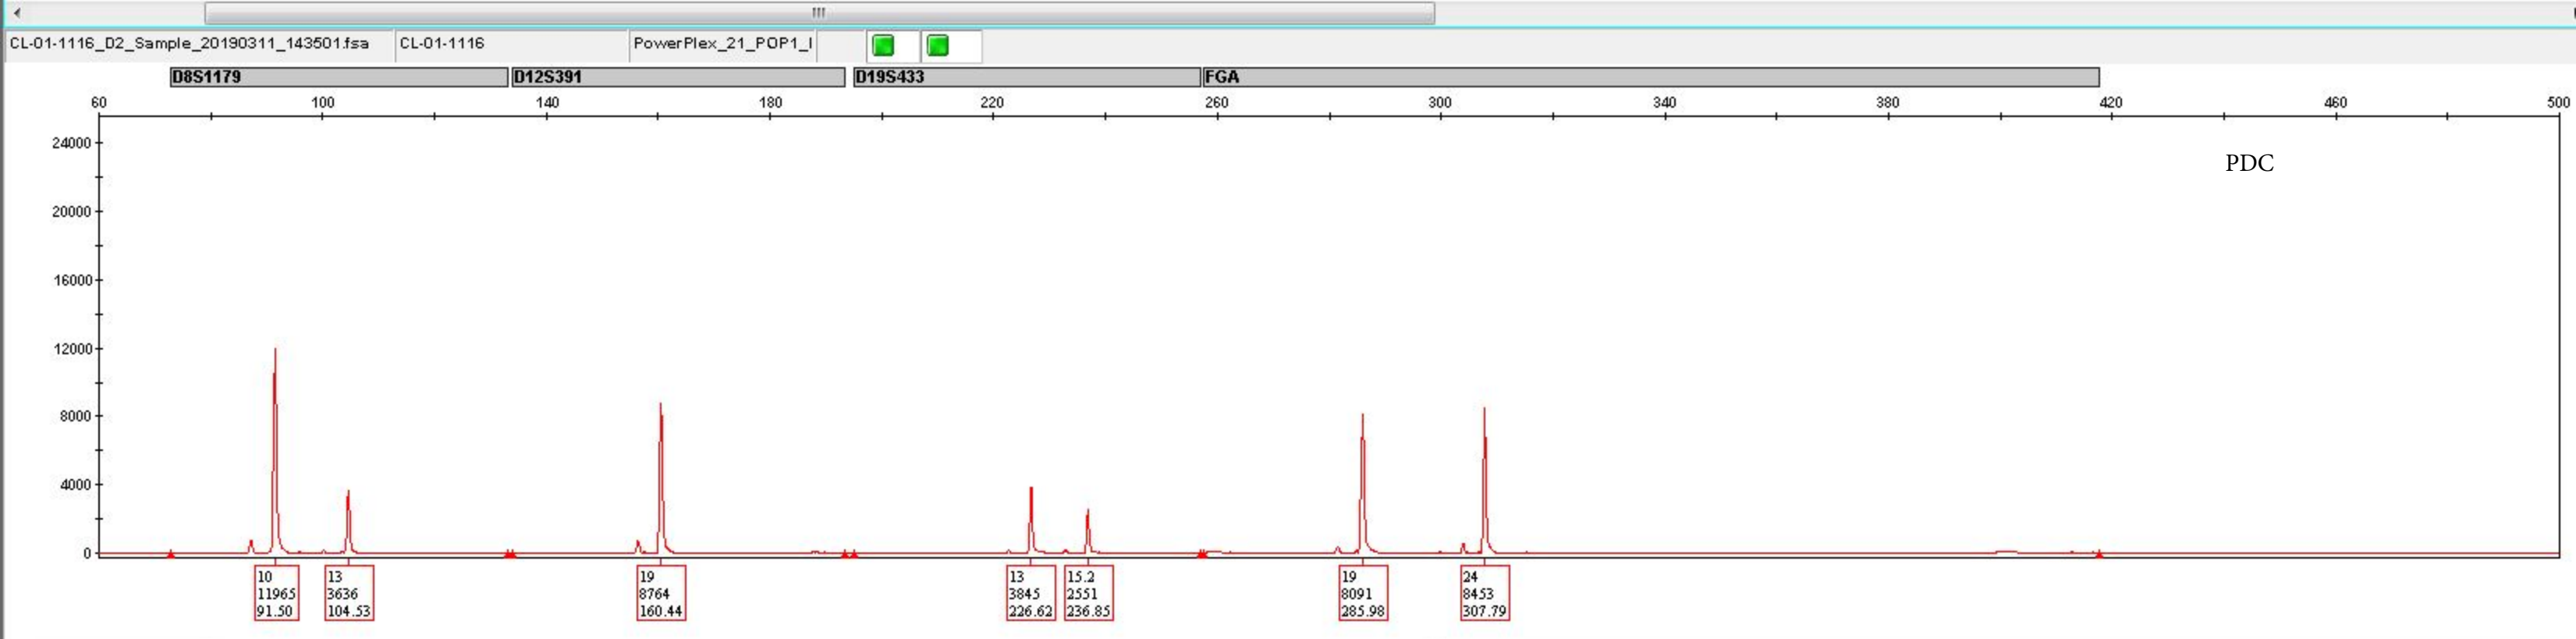

There are no controls in this selection

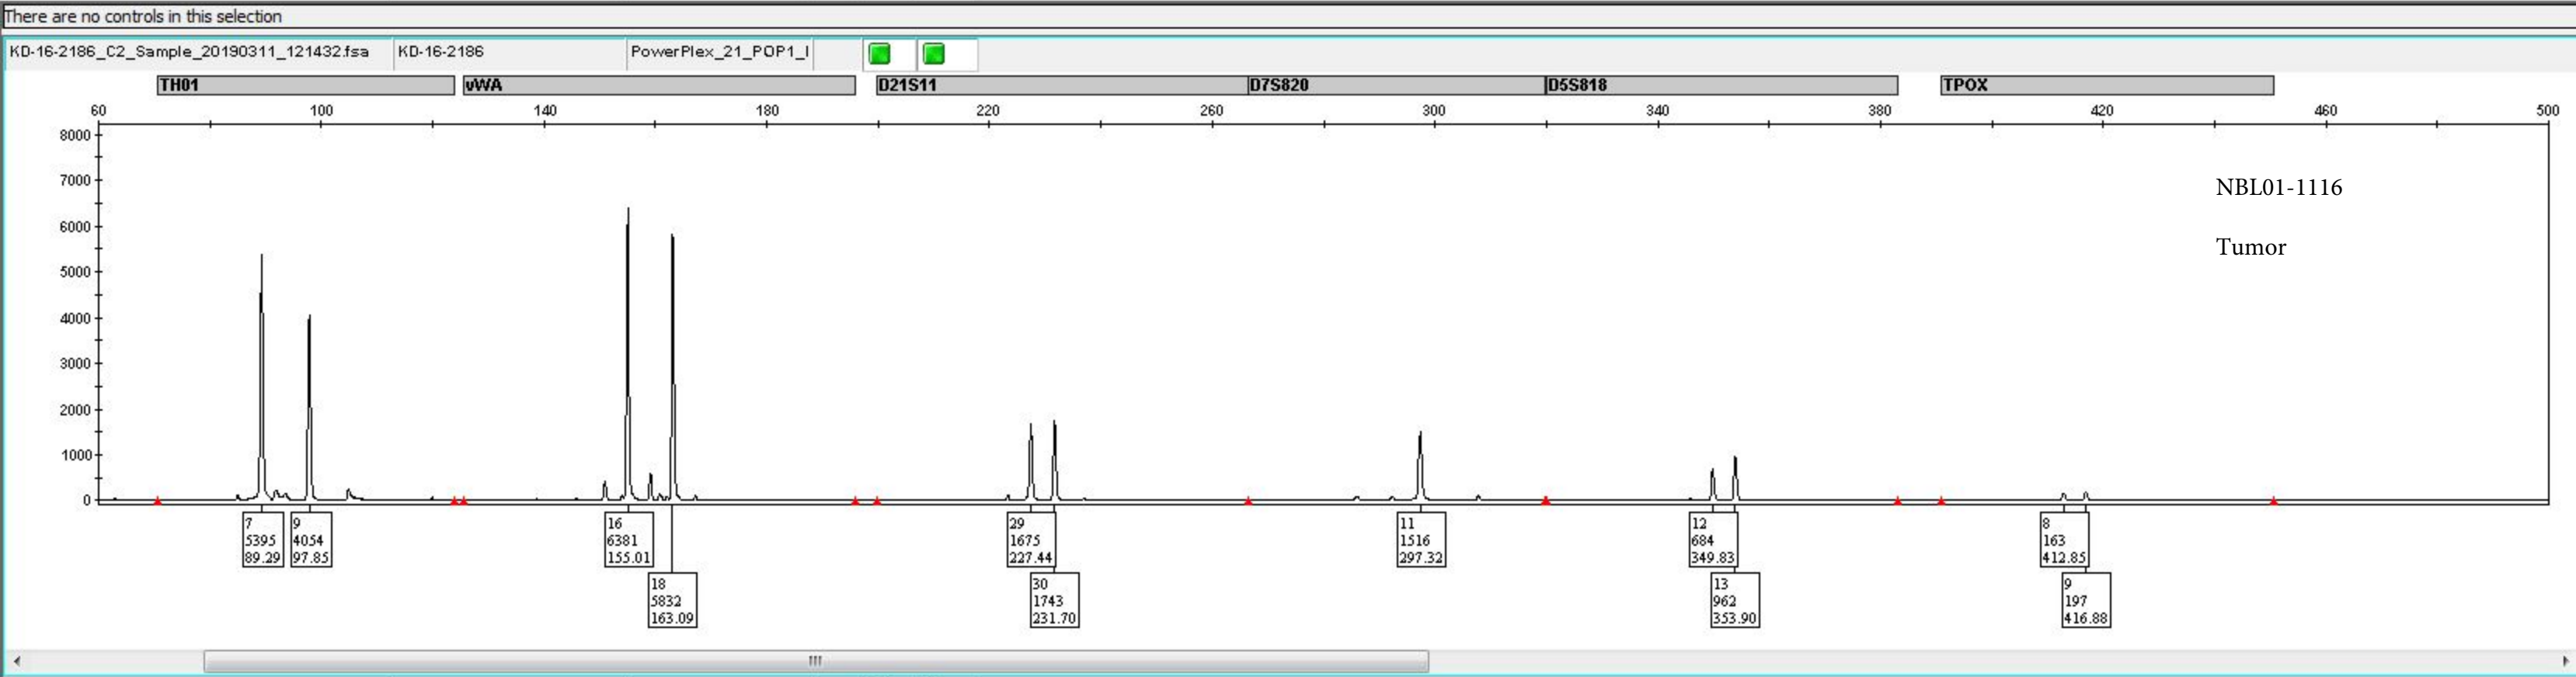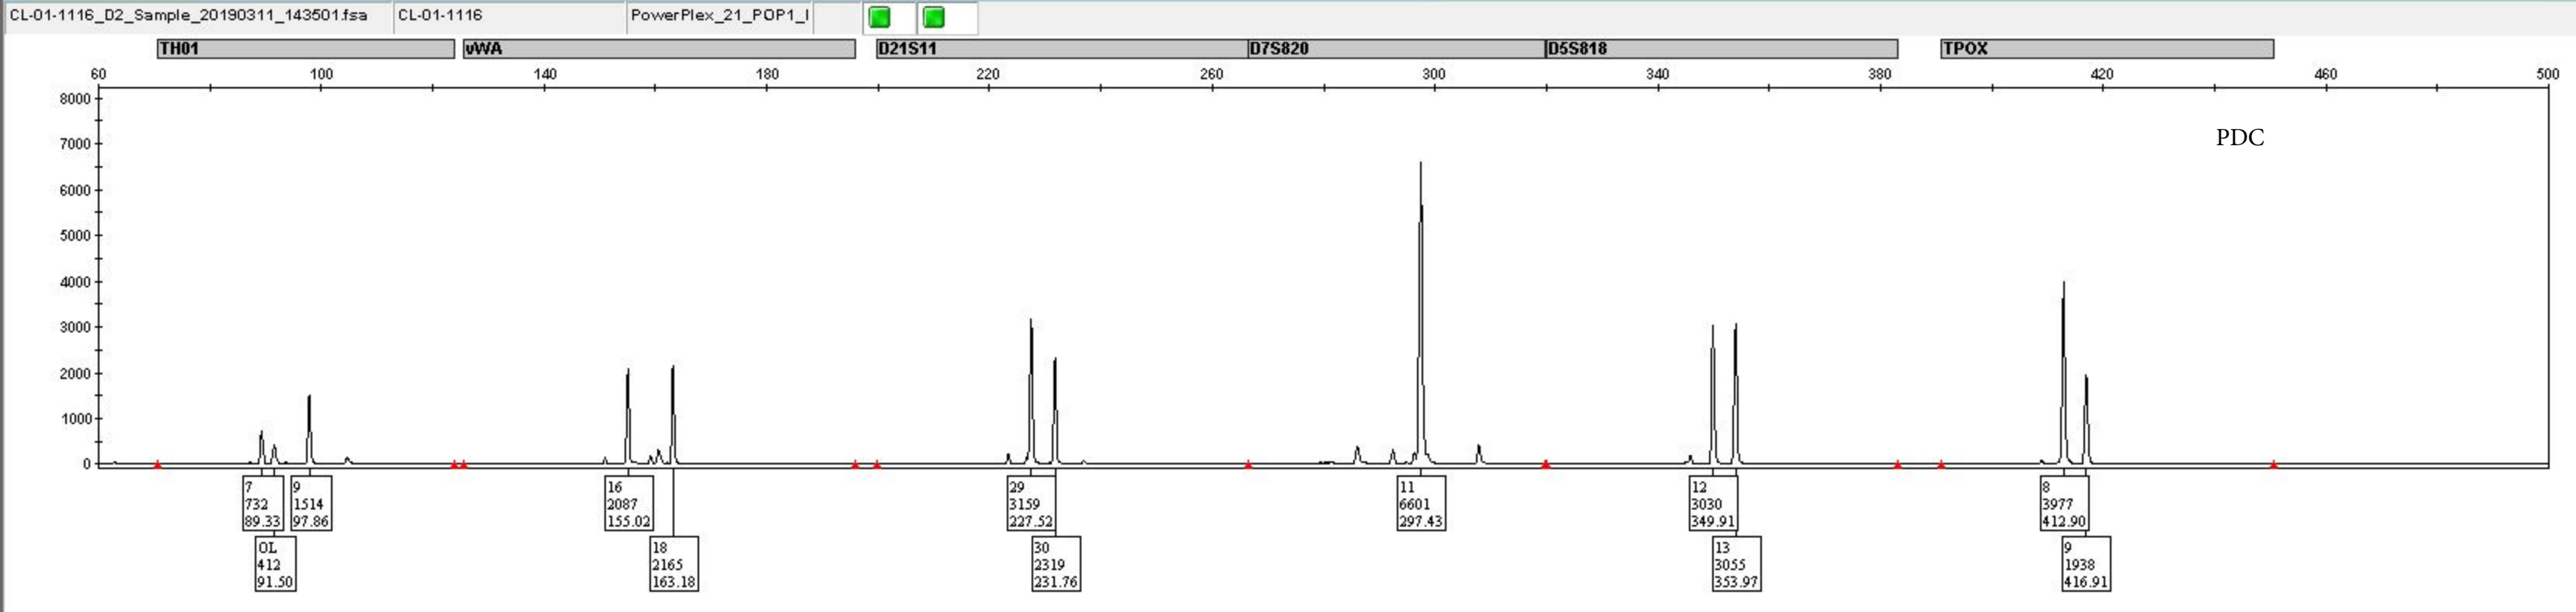



There are no controls in this selection

KD-16-2216\_E2\_Sample\_20190311\_125733.fsa KD-16-2216 PowerPlex\_21\_POP1\_I

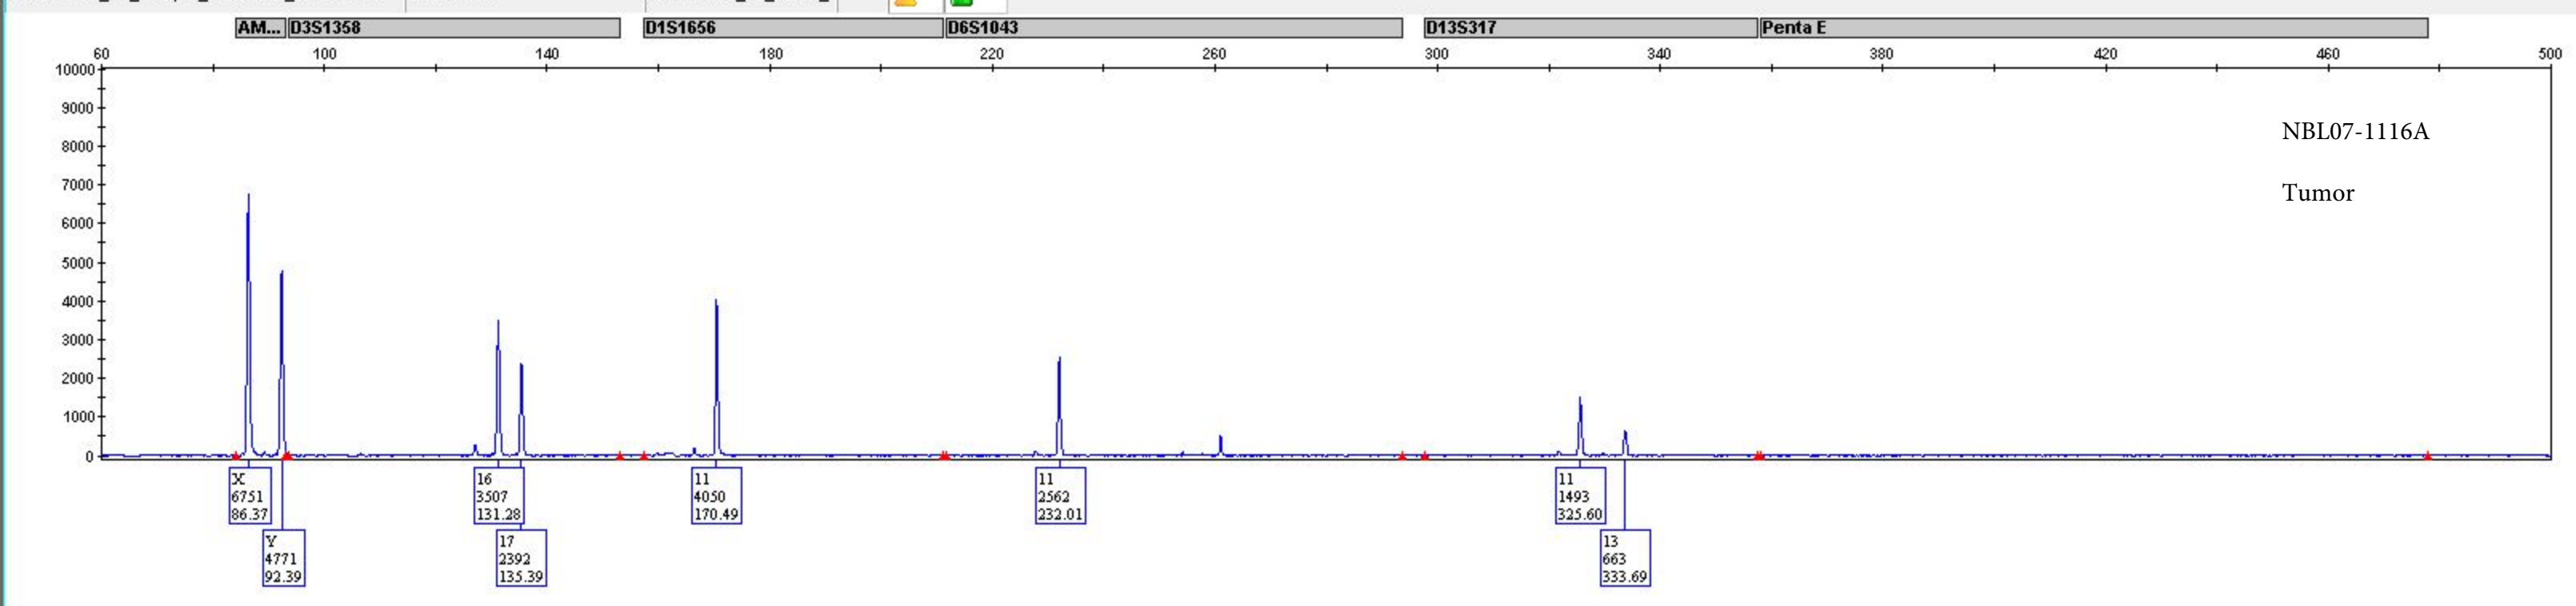

CL-07-1116A\_F2\_Sample\_20190311\_125734.fsa CL-07-1116A PowerPlex\_21\_POP1\_I

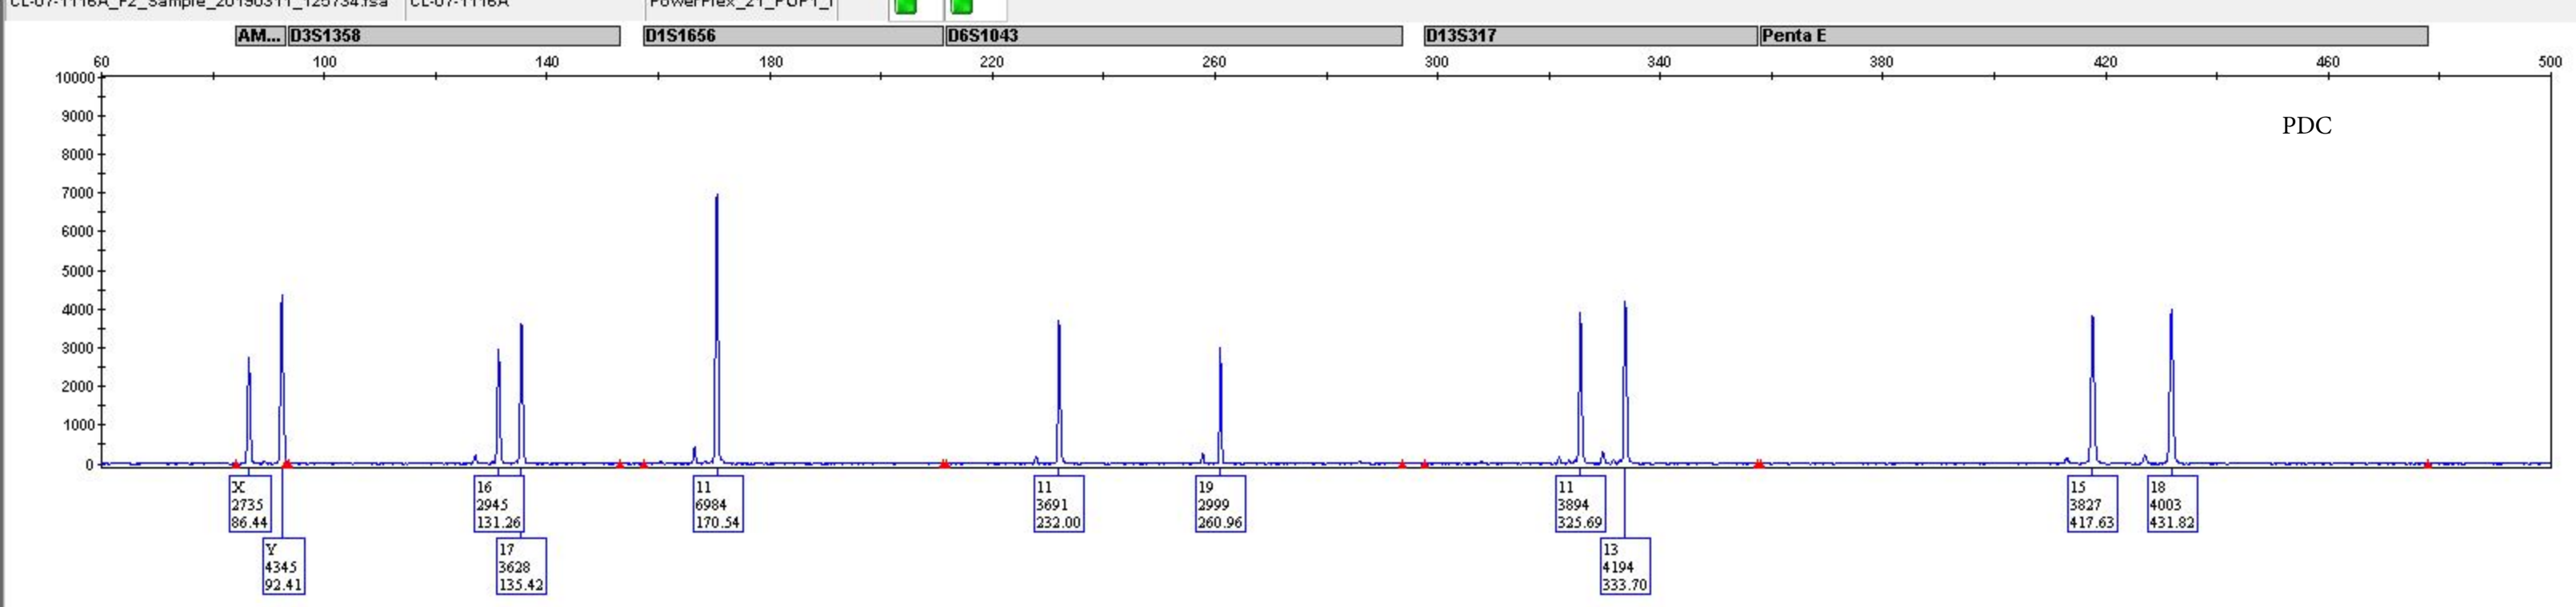

There are no controls in this selection

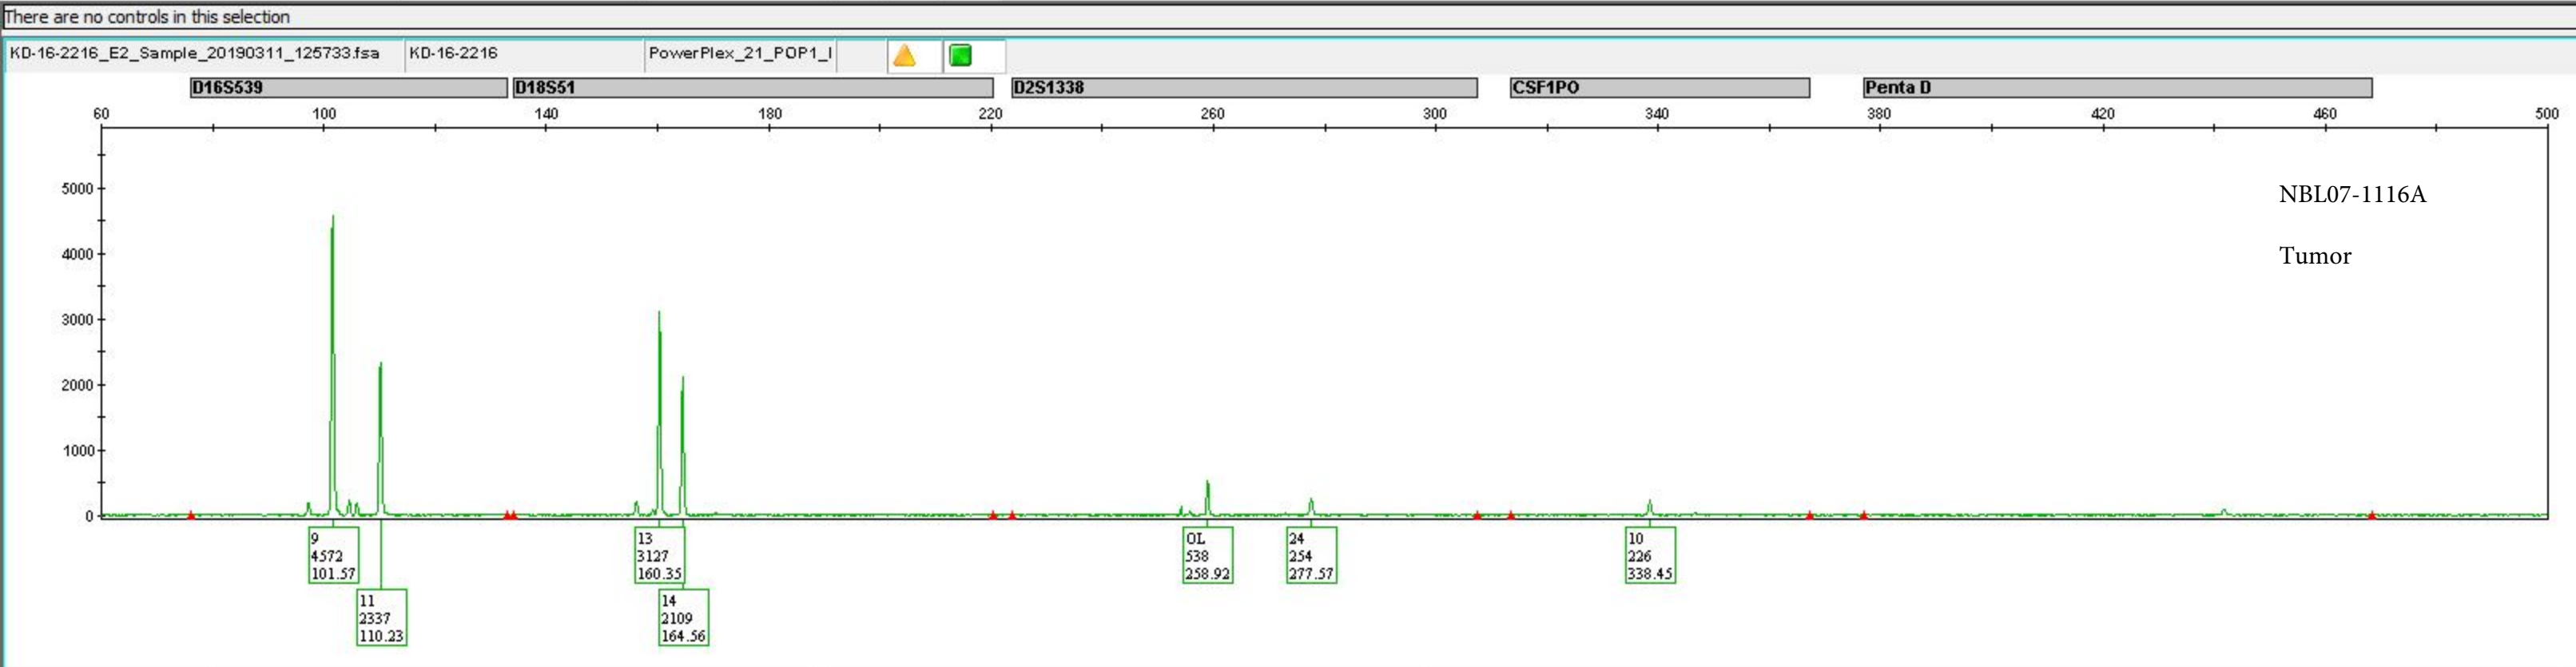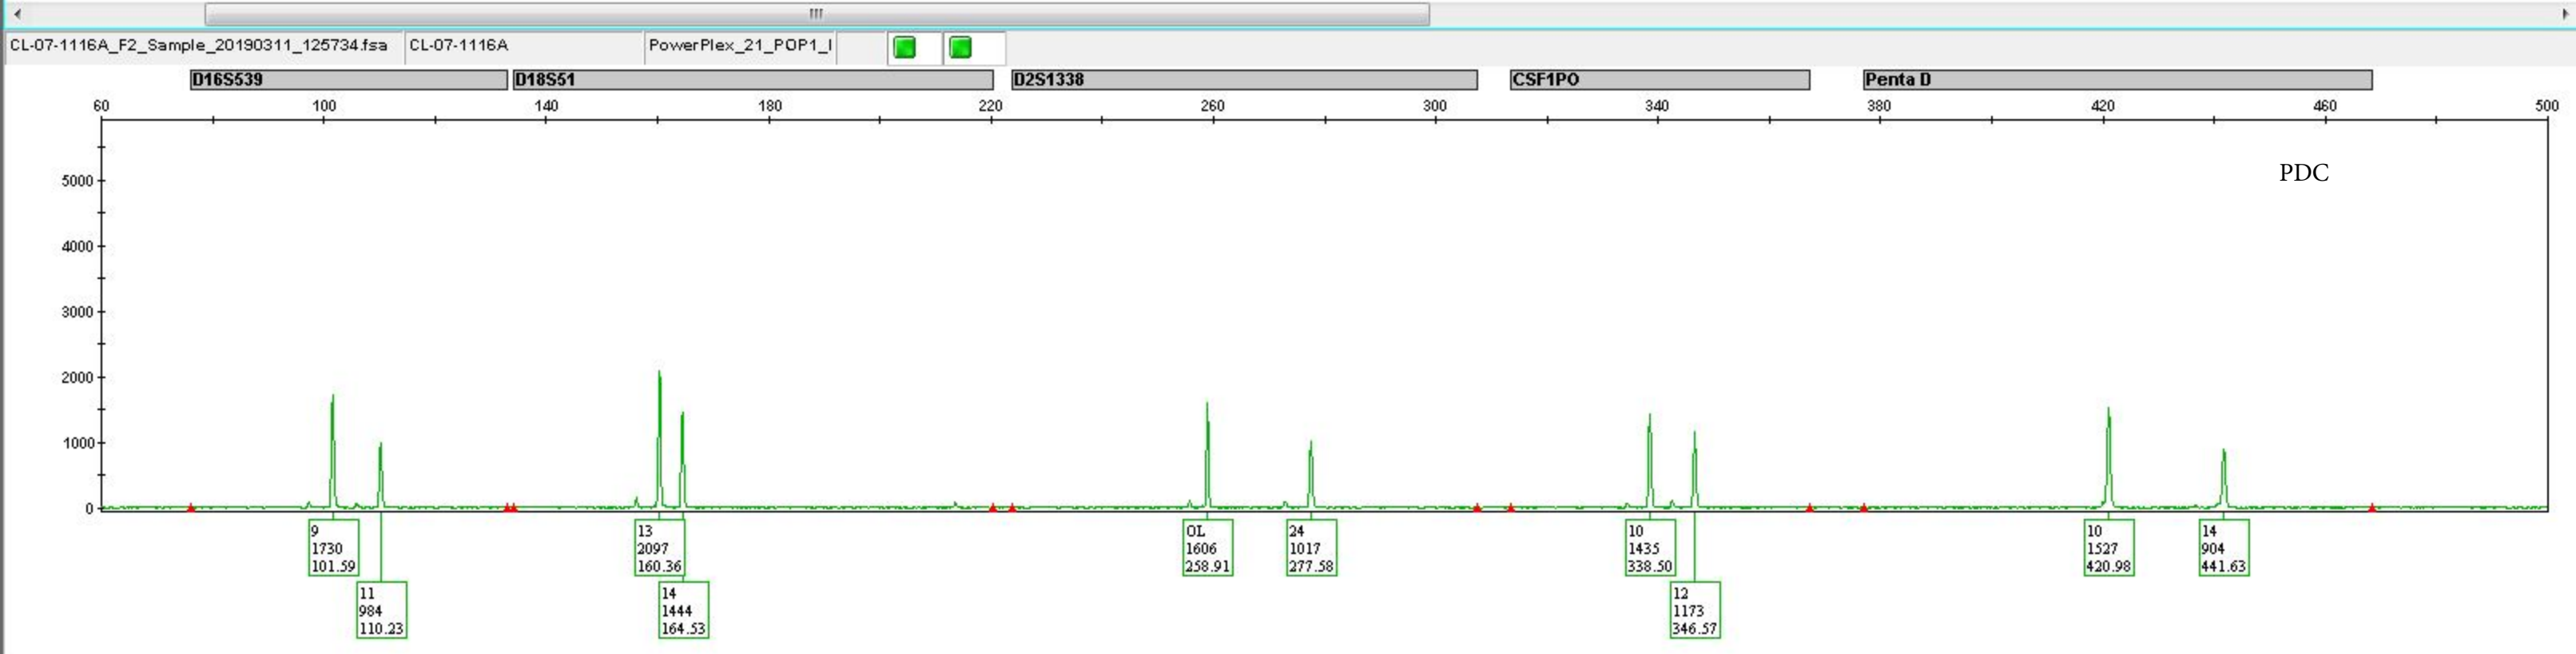

There are no controls in this selection

KD-16-2216\_E2\_Sample\_20190311\_125733.fsa KD-16-2216 PowerPlex\_21\_POP1\_1

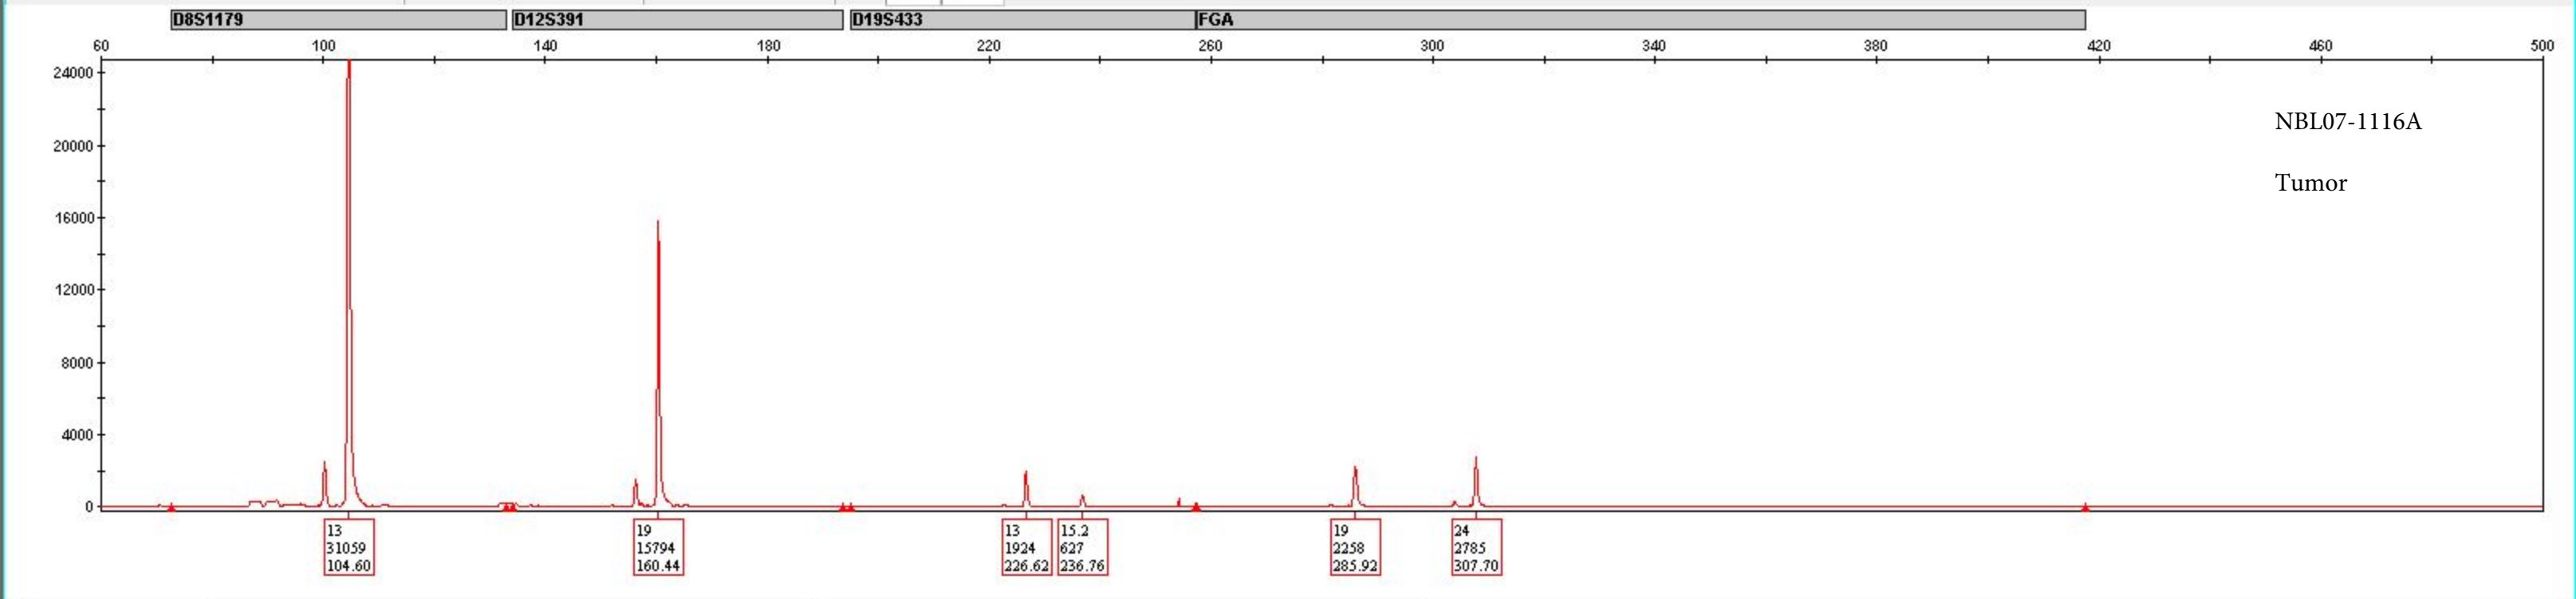

CL-07-1116A\_F2\_Sample\_20190311\_125734.fsa CL-07-1116A PowerPlex\_21\_POP1\_1

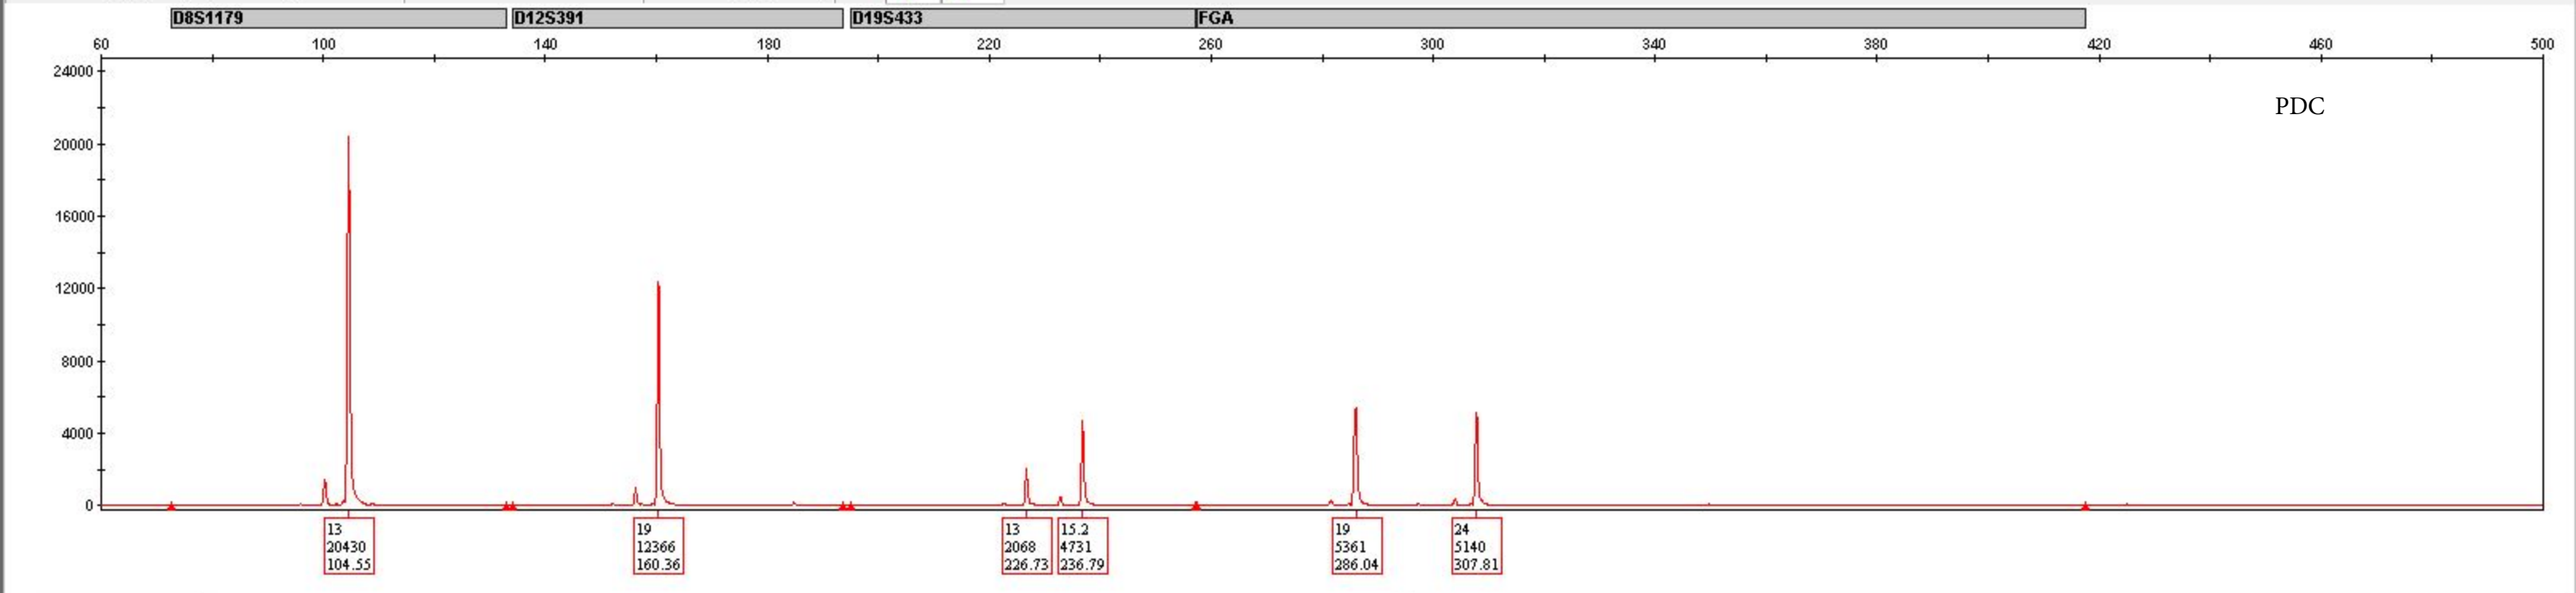

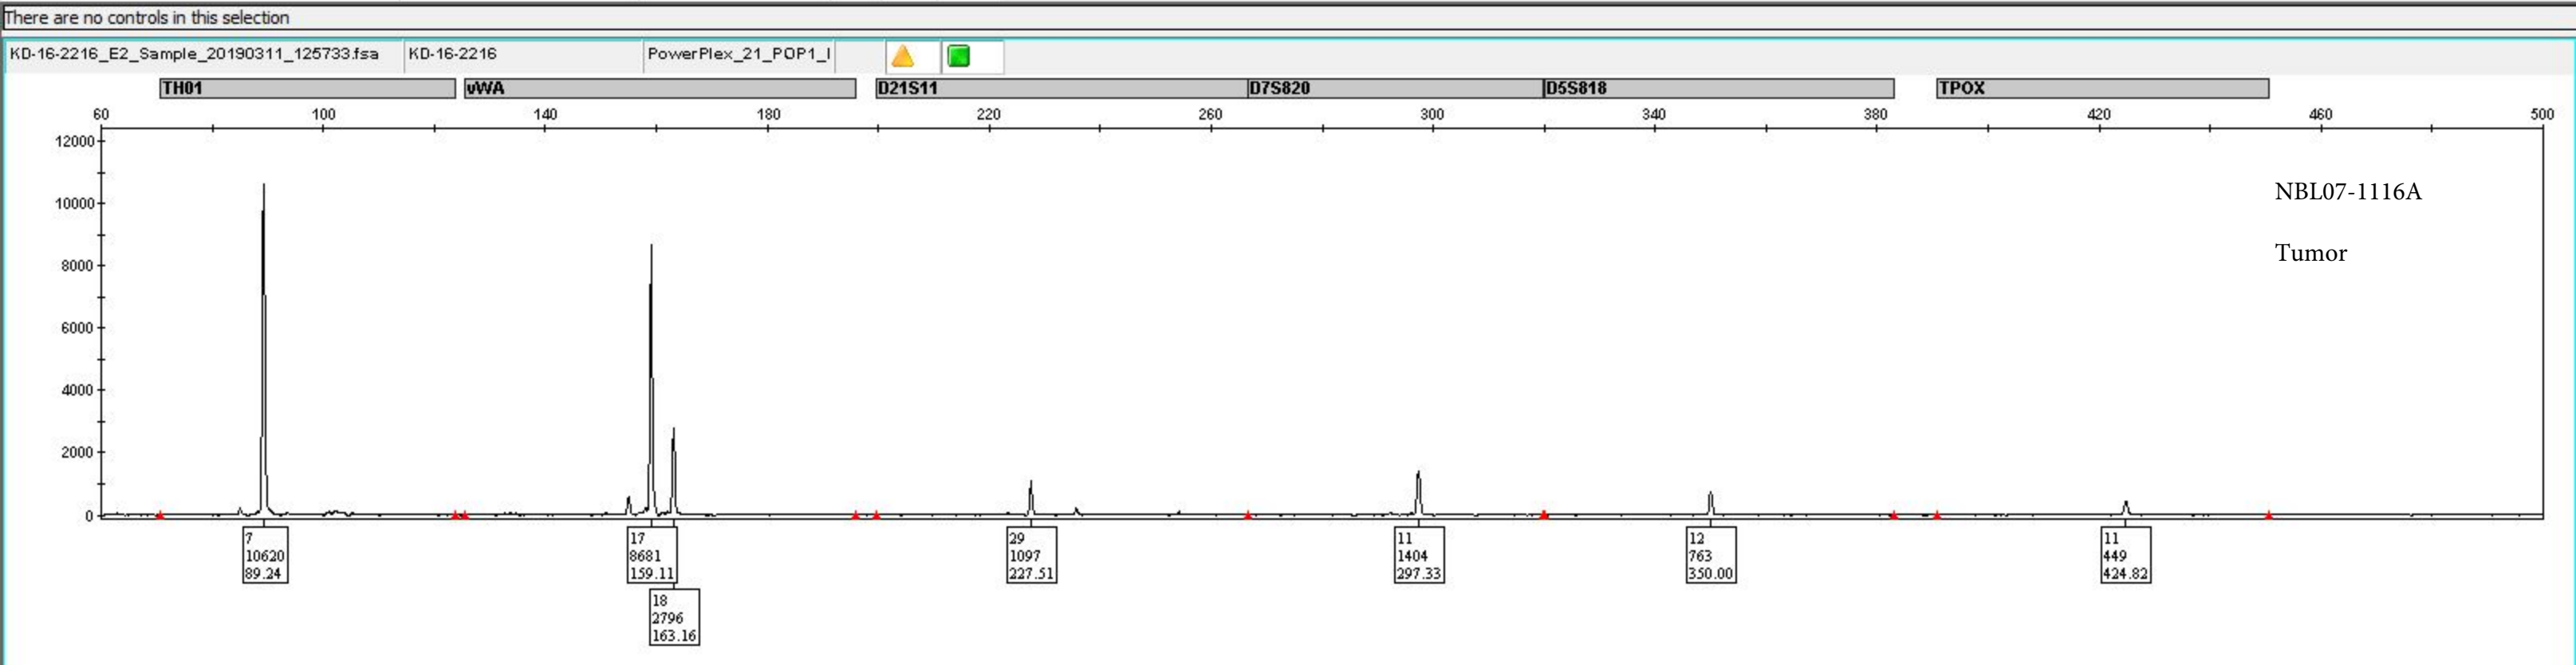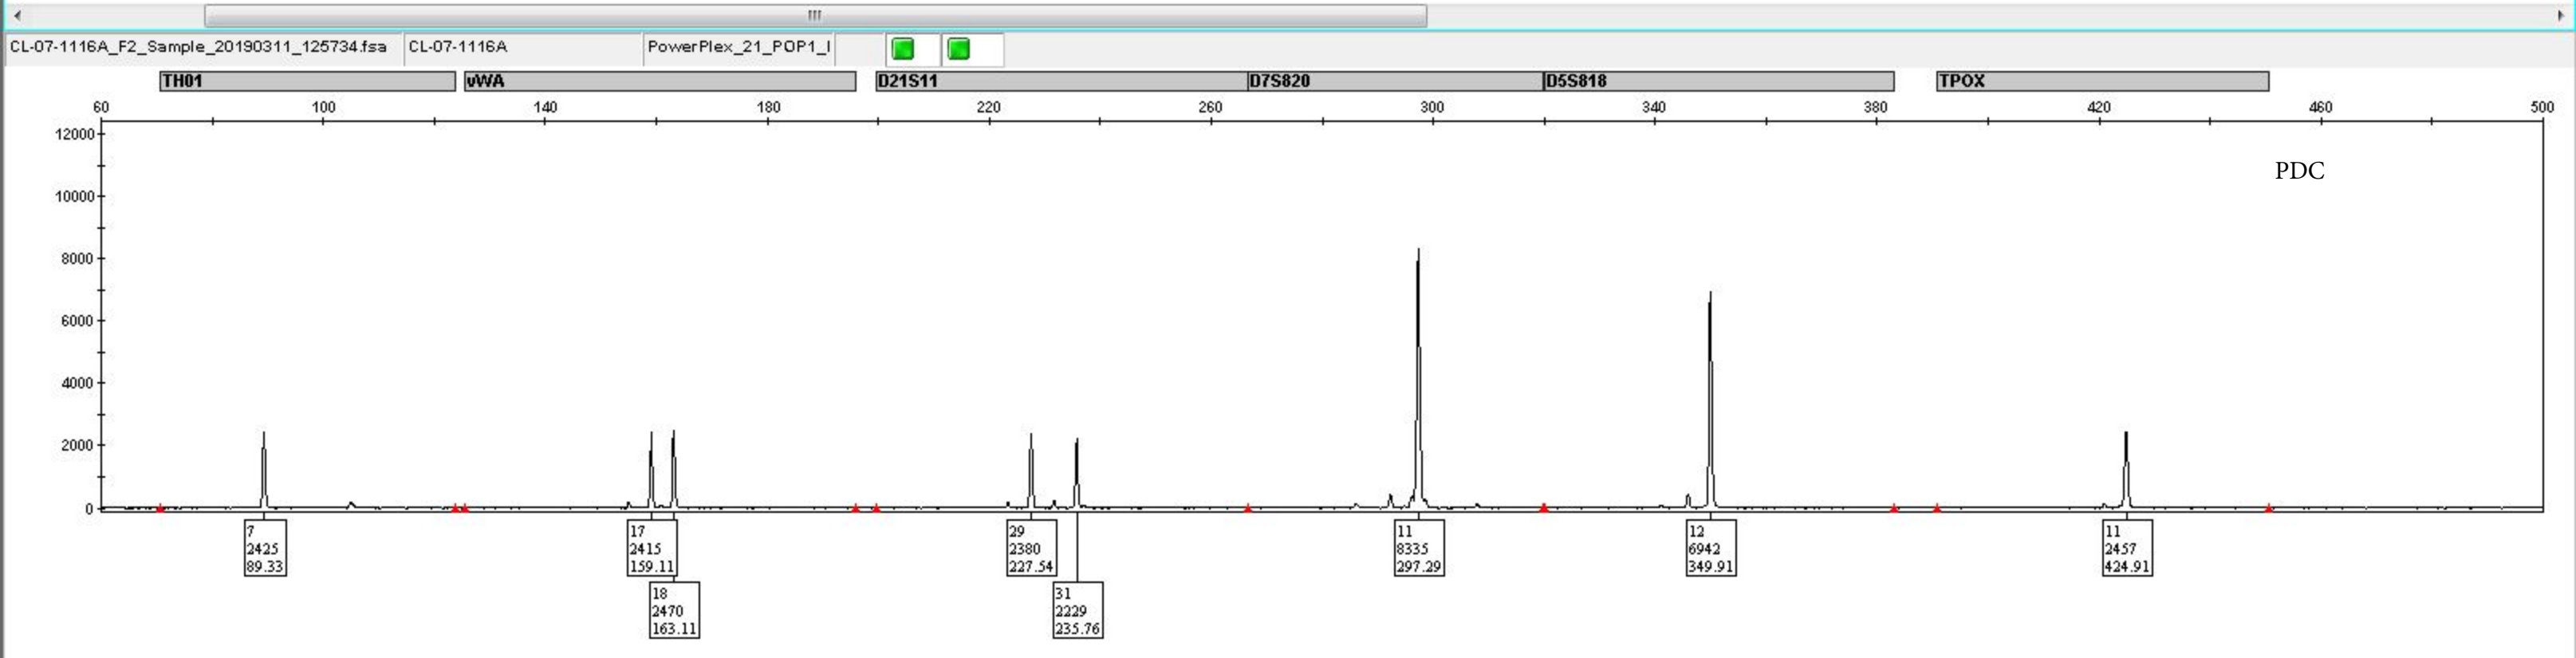

There are no controls in this selection

KD-16-2227\_A7\_Sample\_20190329\_155144.fsa KD-16-2227 PowerPlex\_21\_POP1\_I

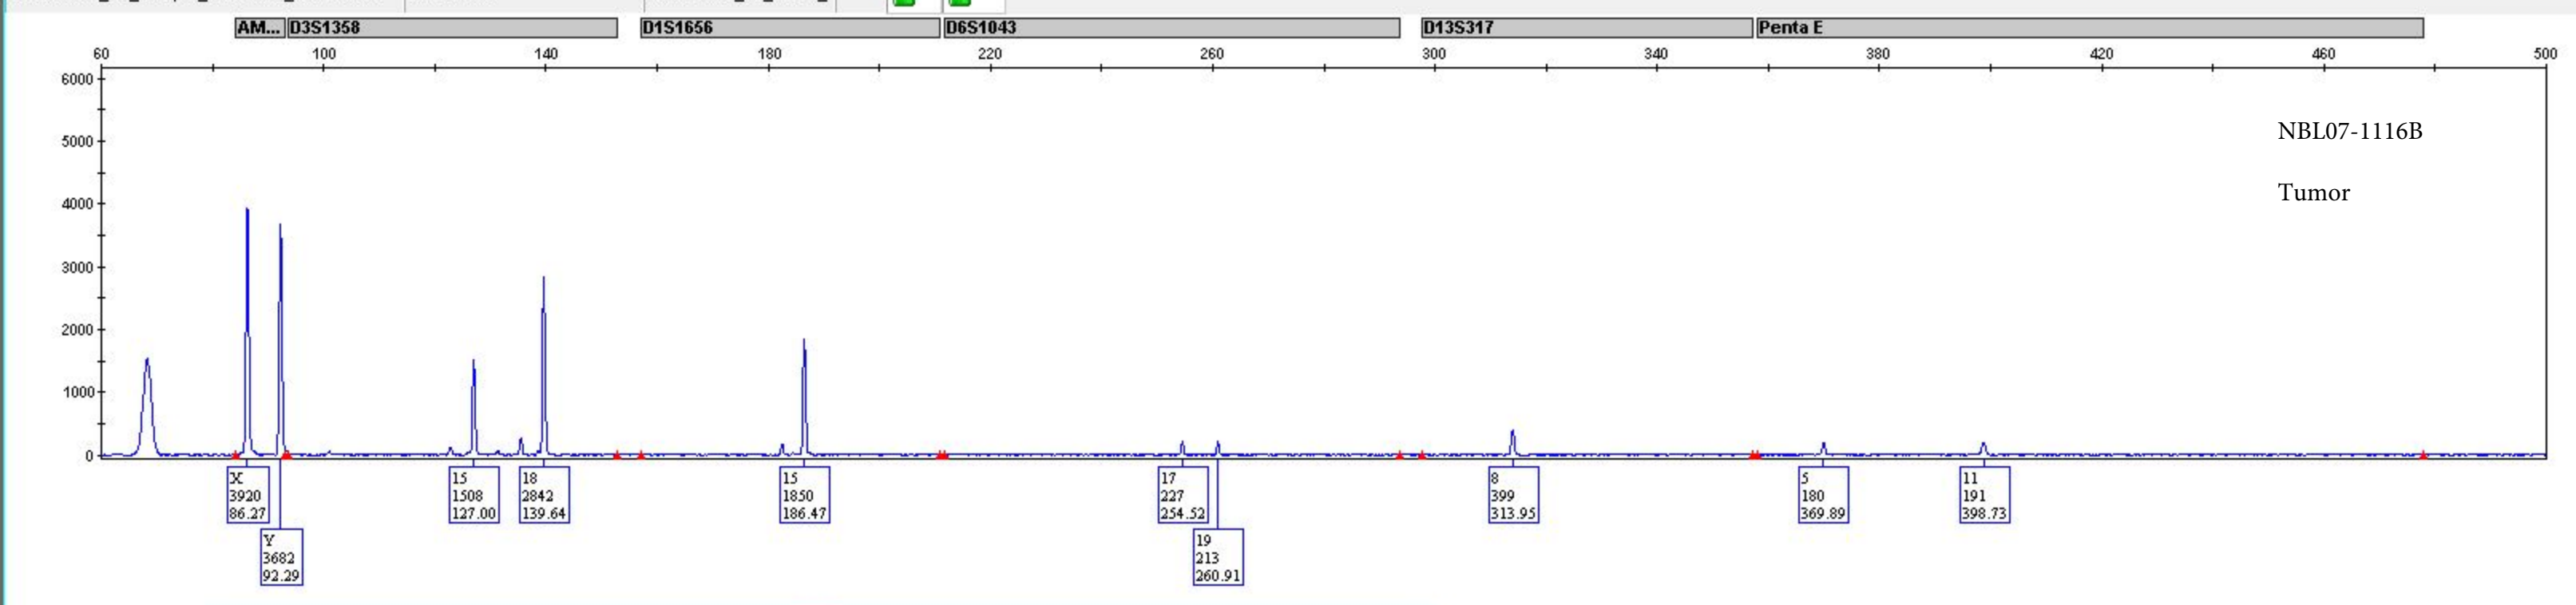

CL-07-1116B\_B7\_Sample\_20190329\_155145.fsa CL-07-1116B PowerPlex\_21\_POP1\_I

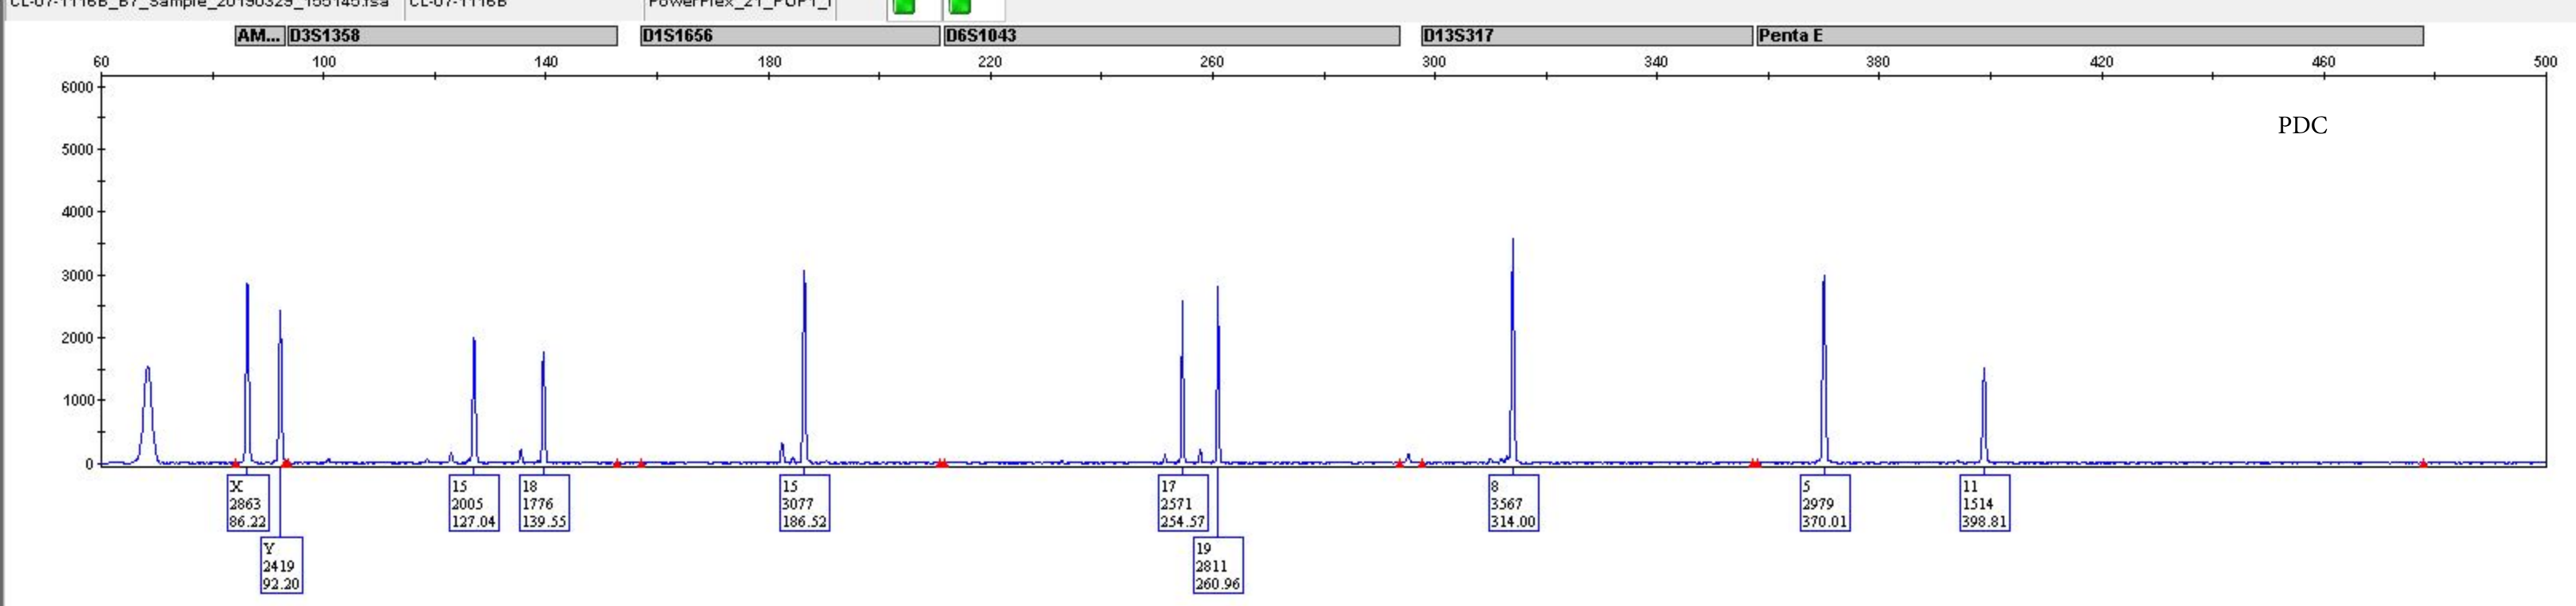

There are no controls in this selection

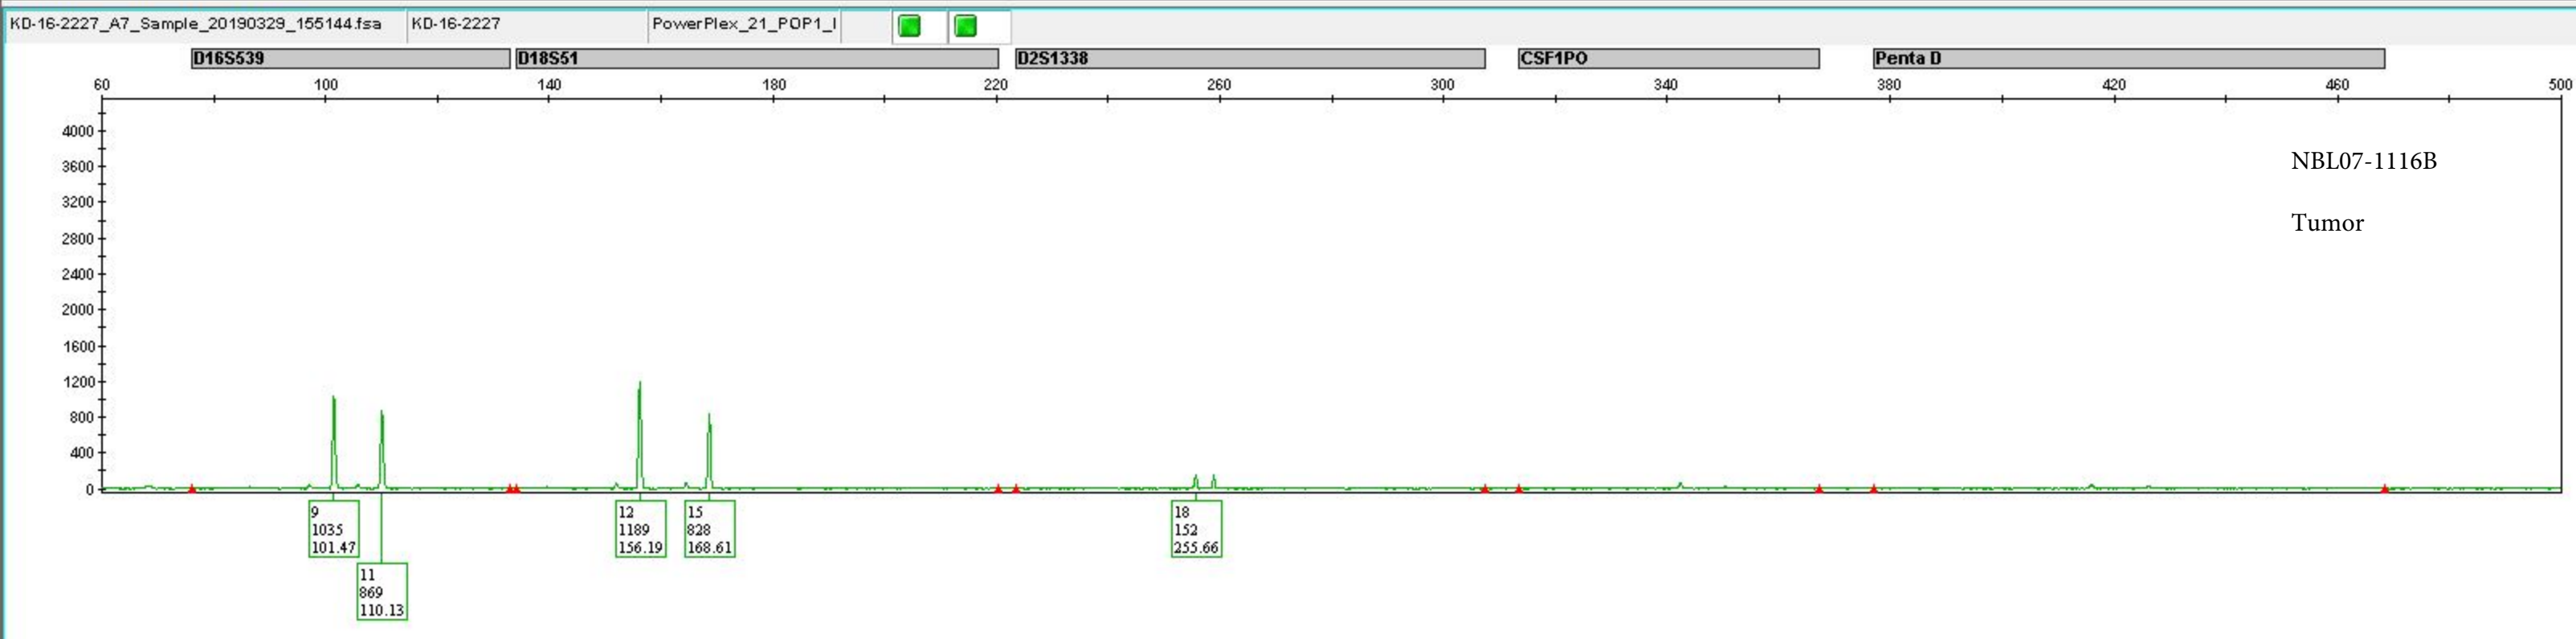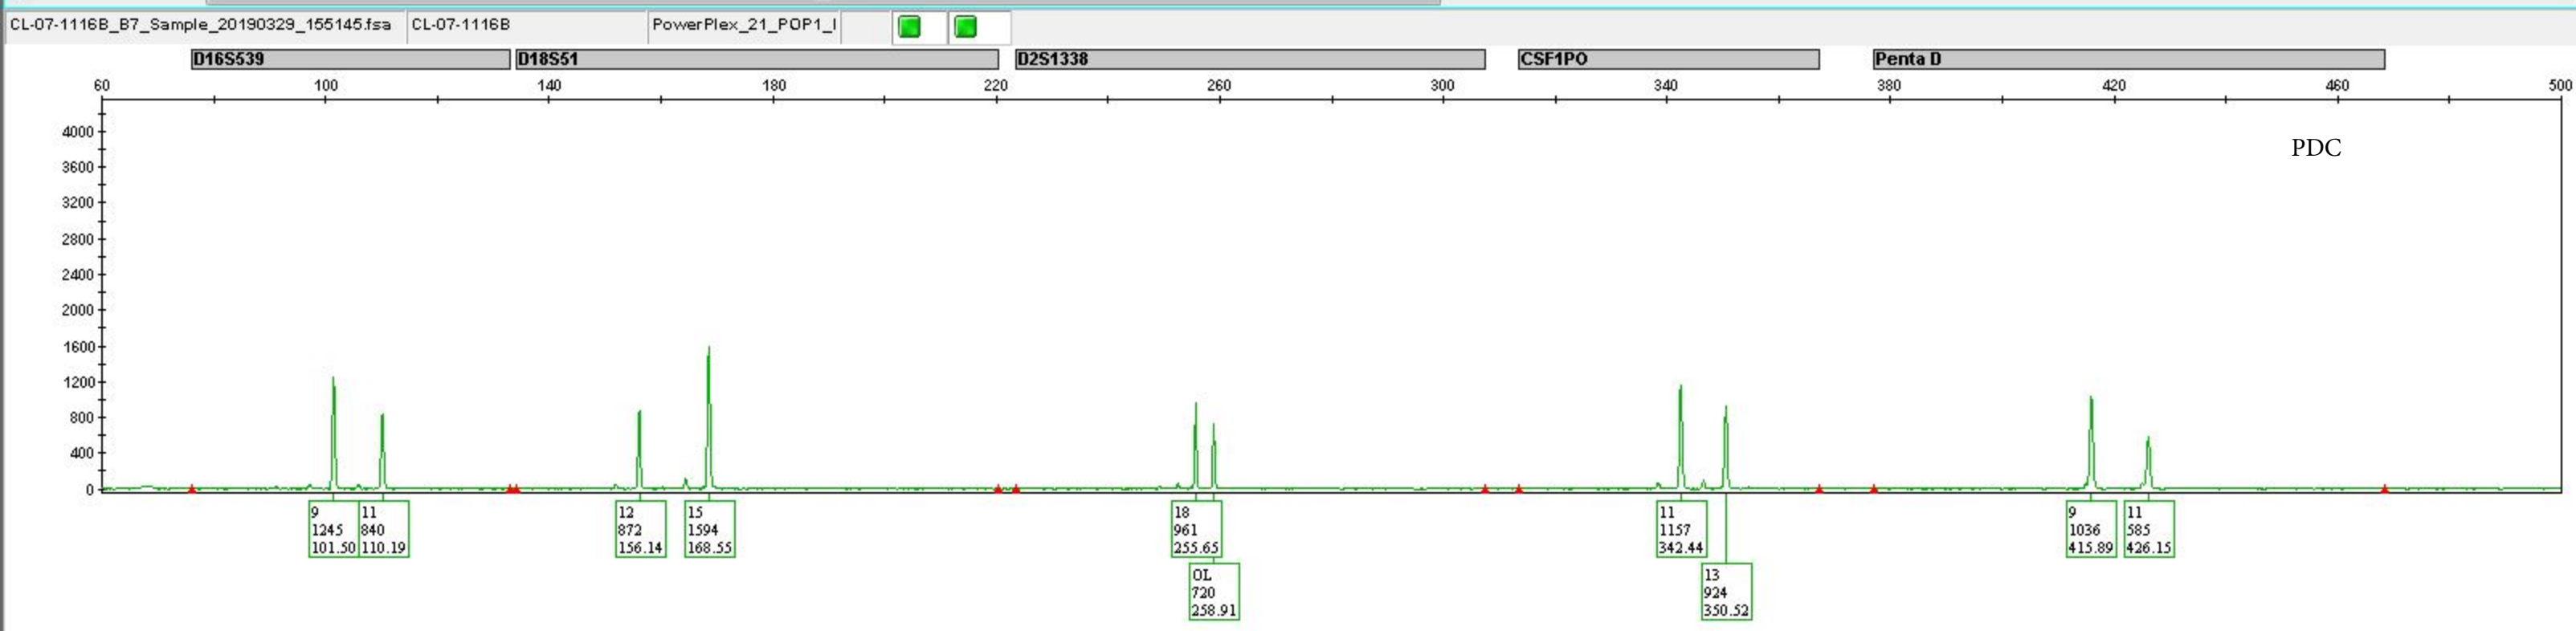

There are no controls in this selection

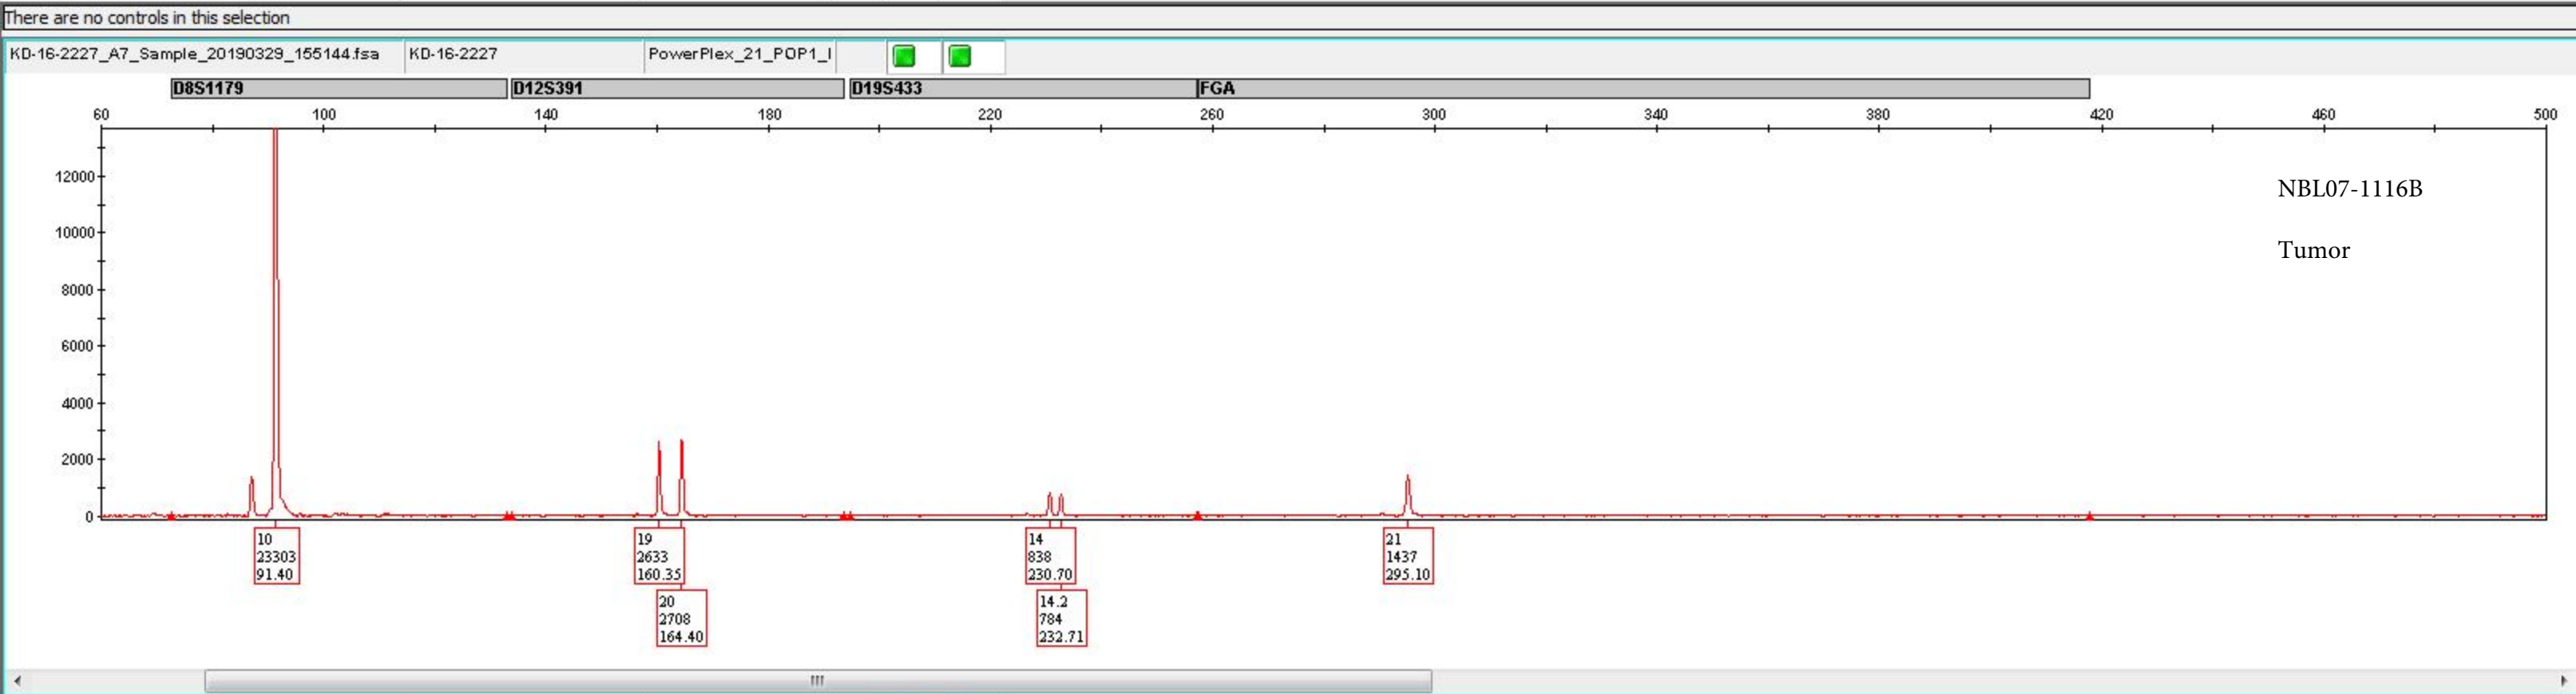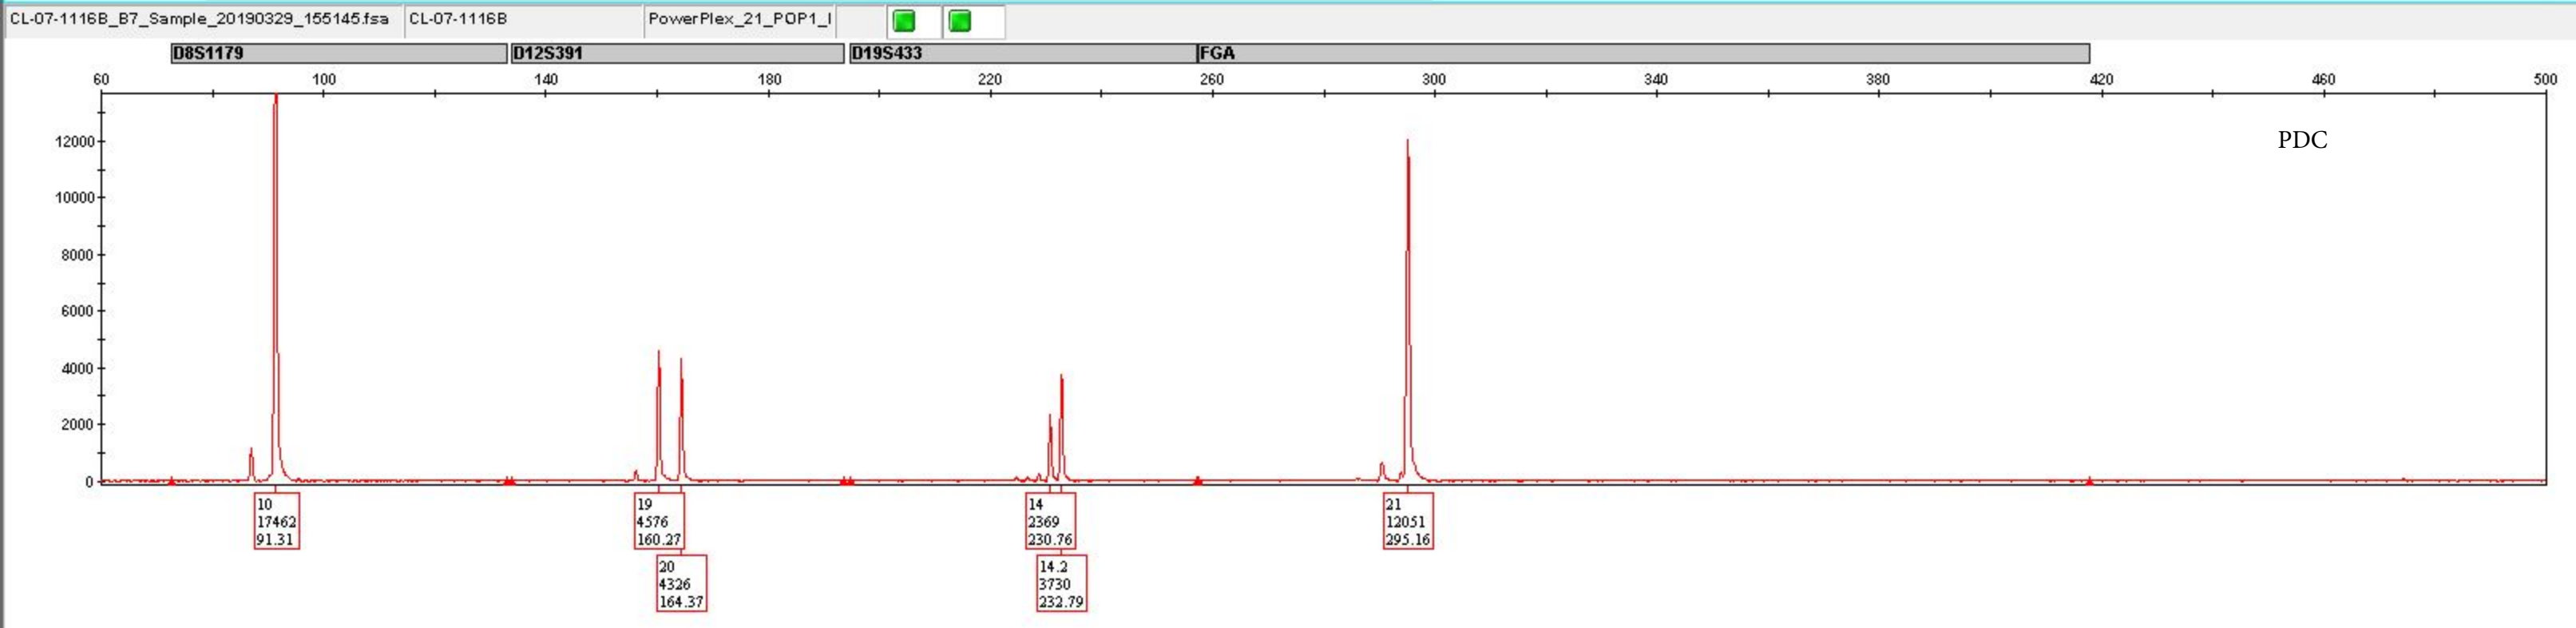

There are no controls in this selection

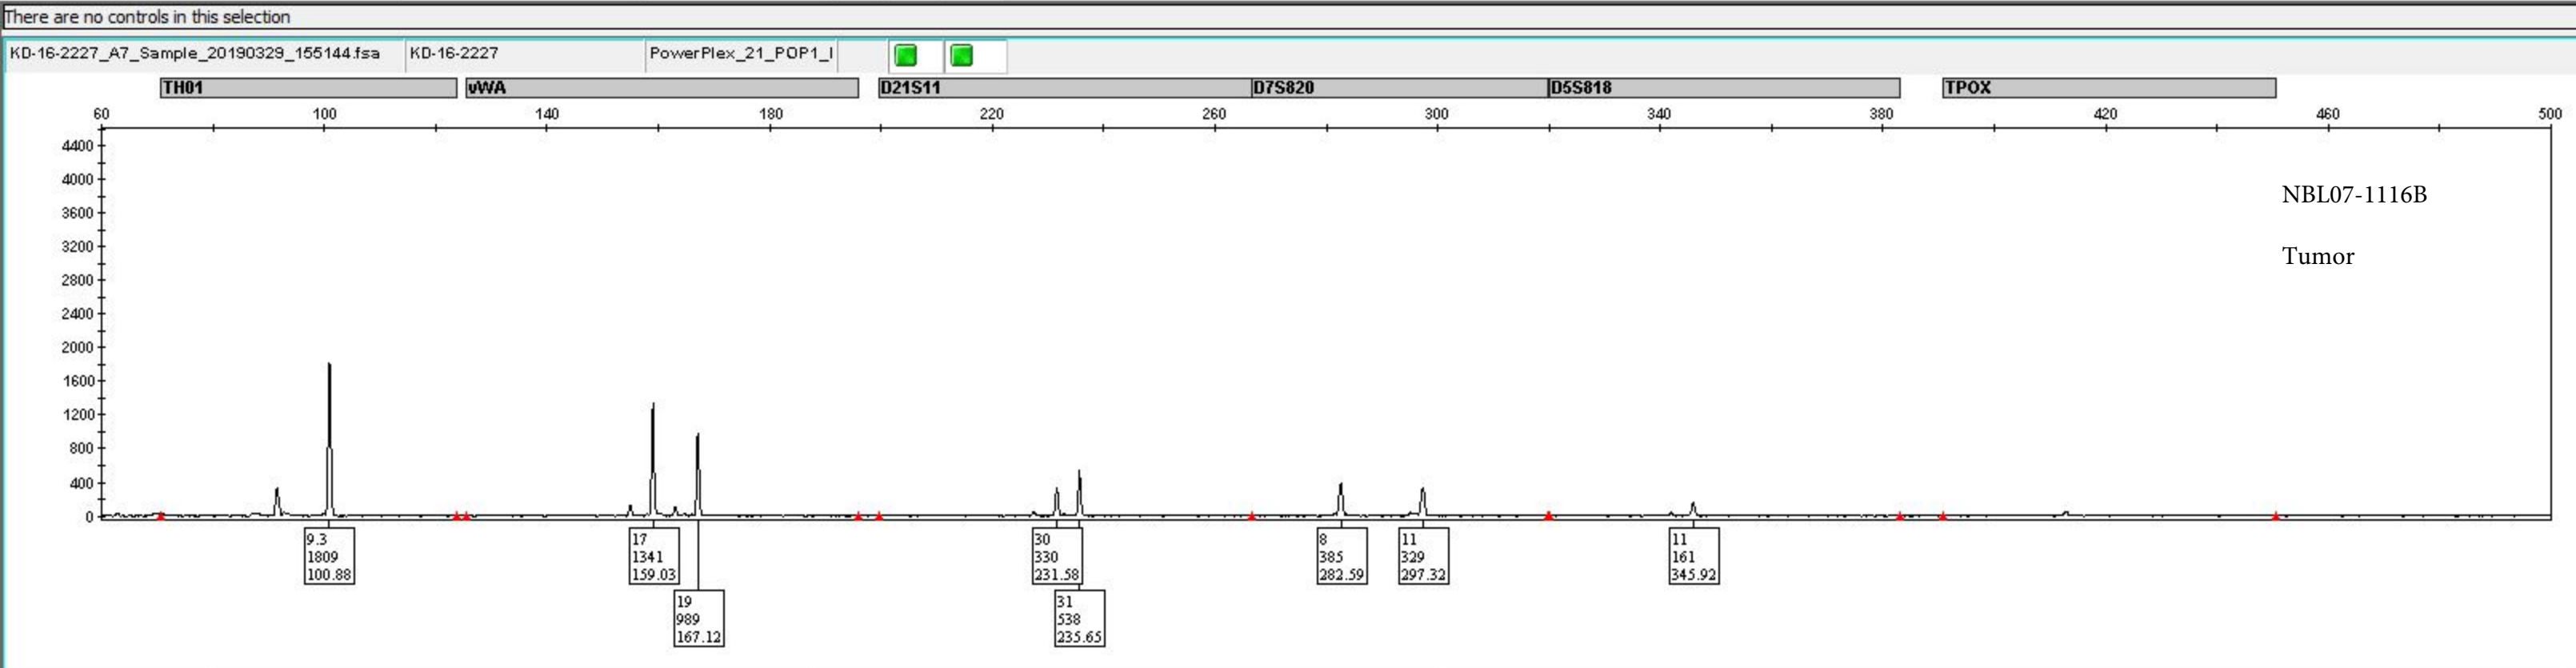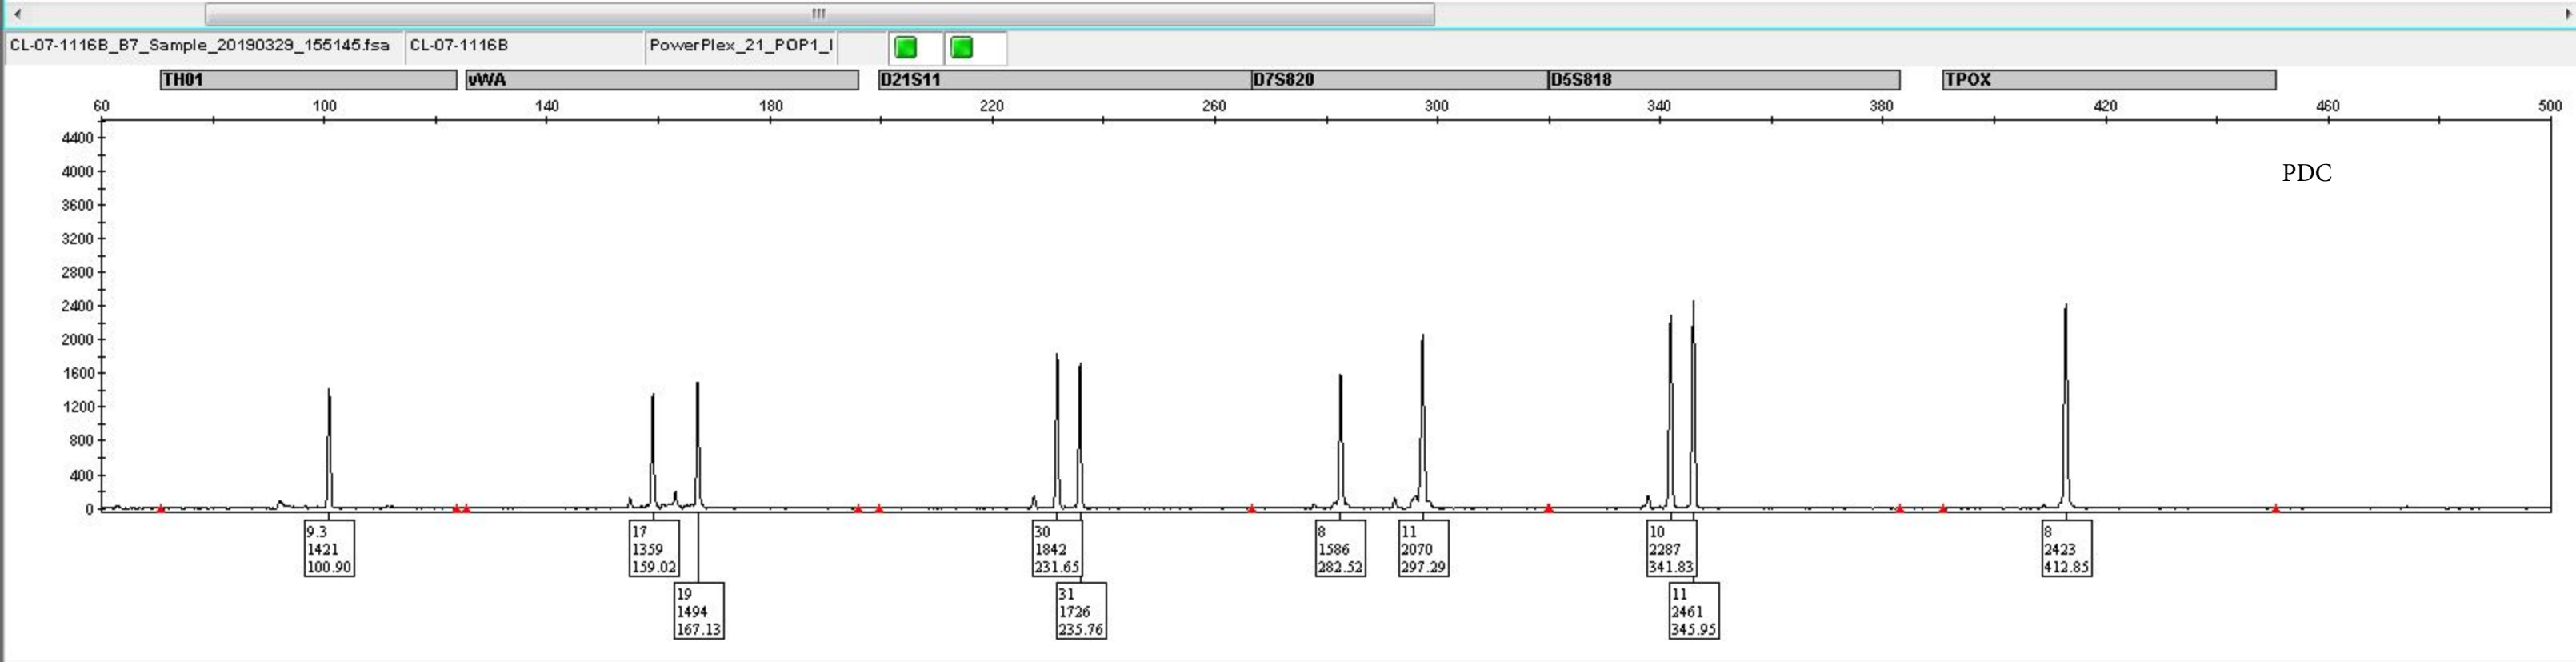



There are no controls in this selection

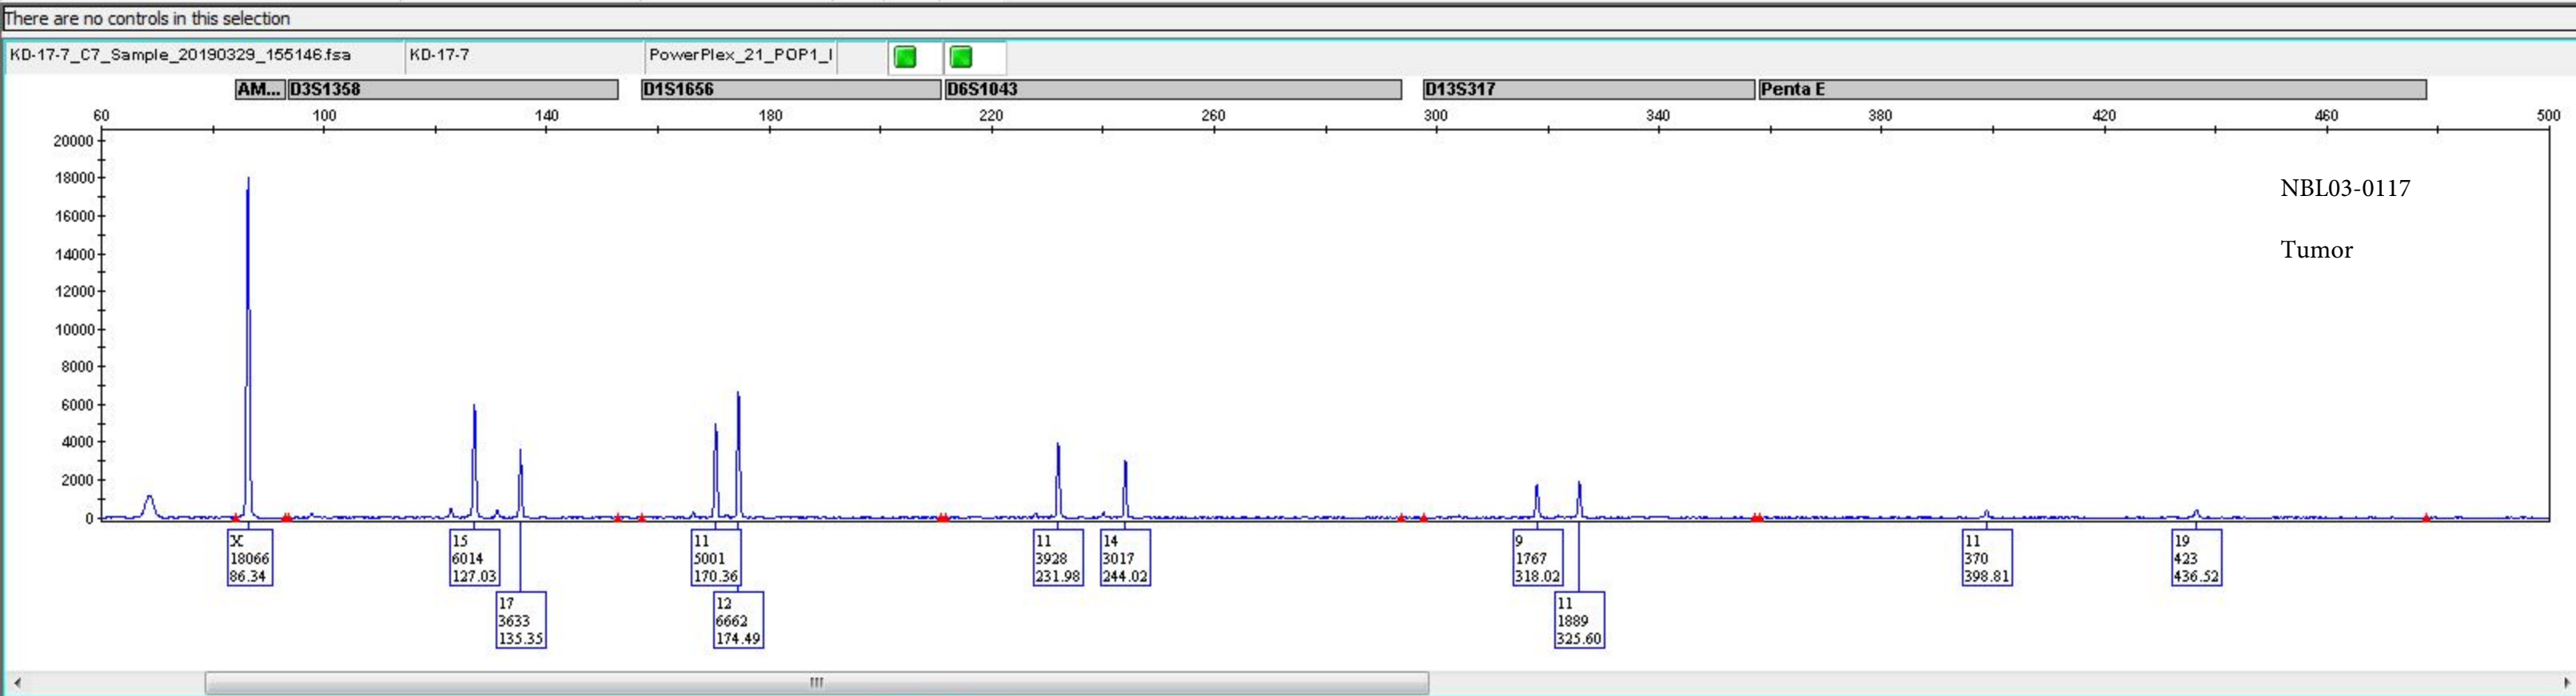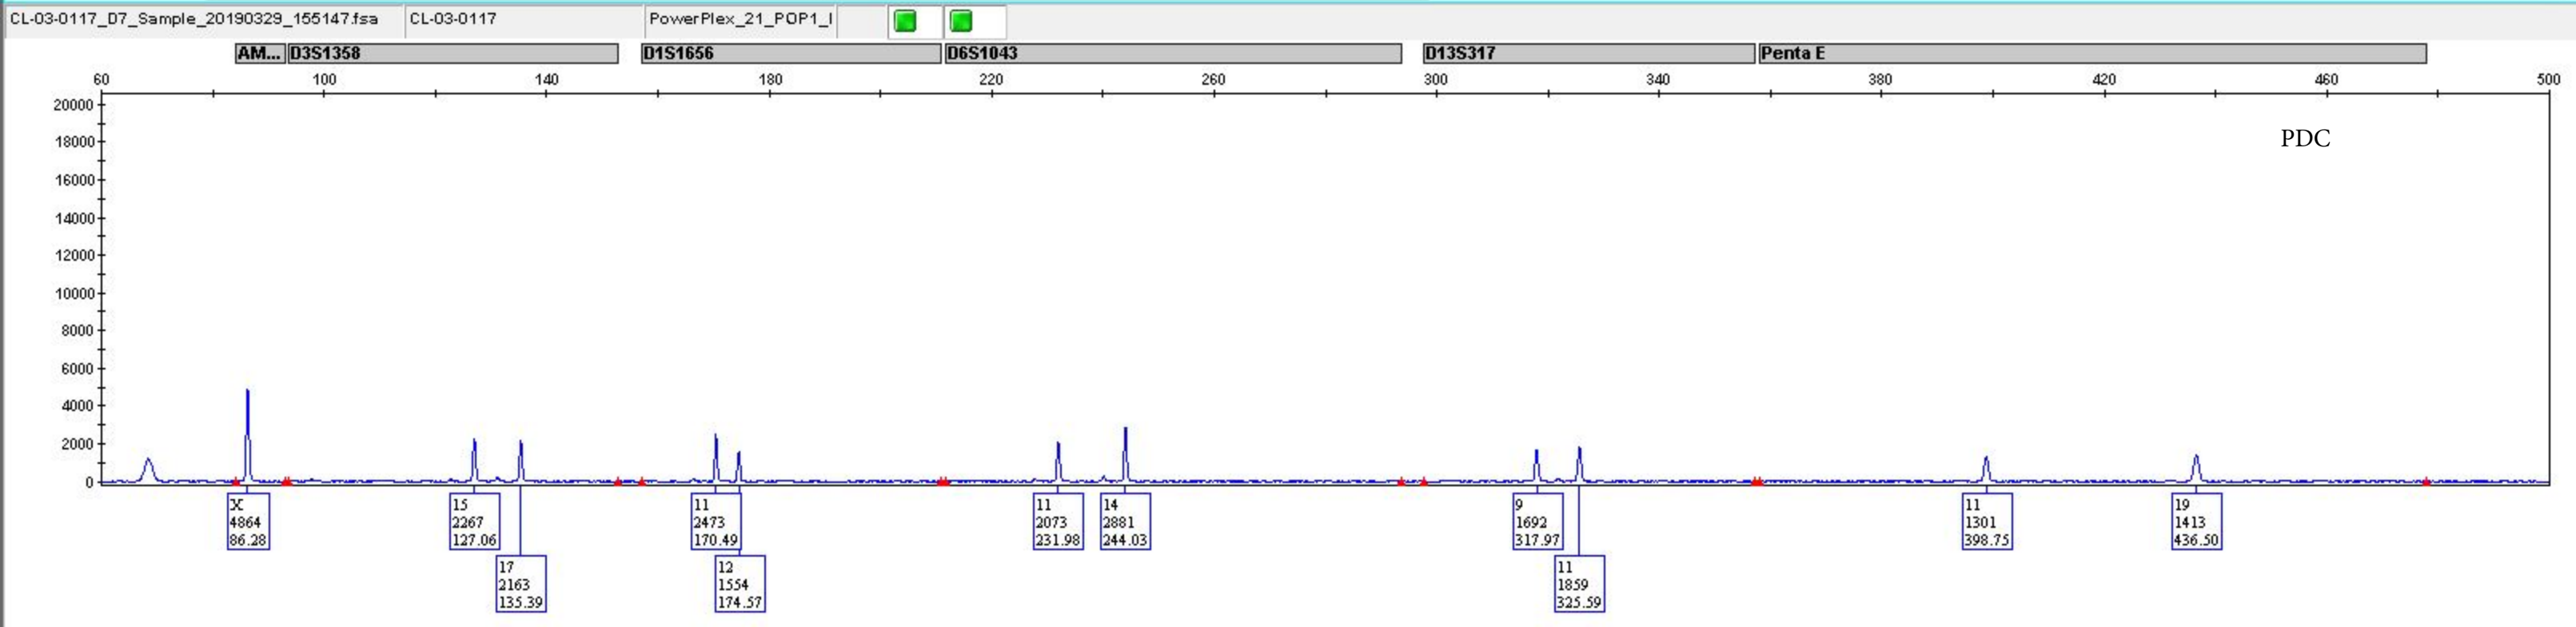

There are no controls in this selection

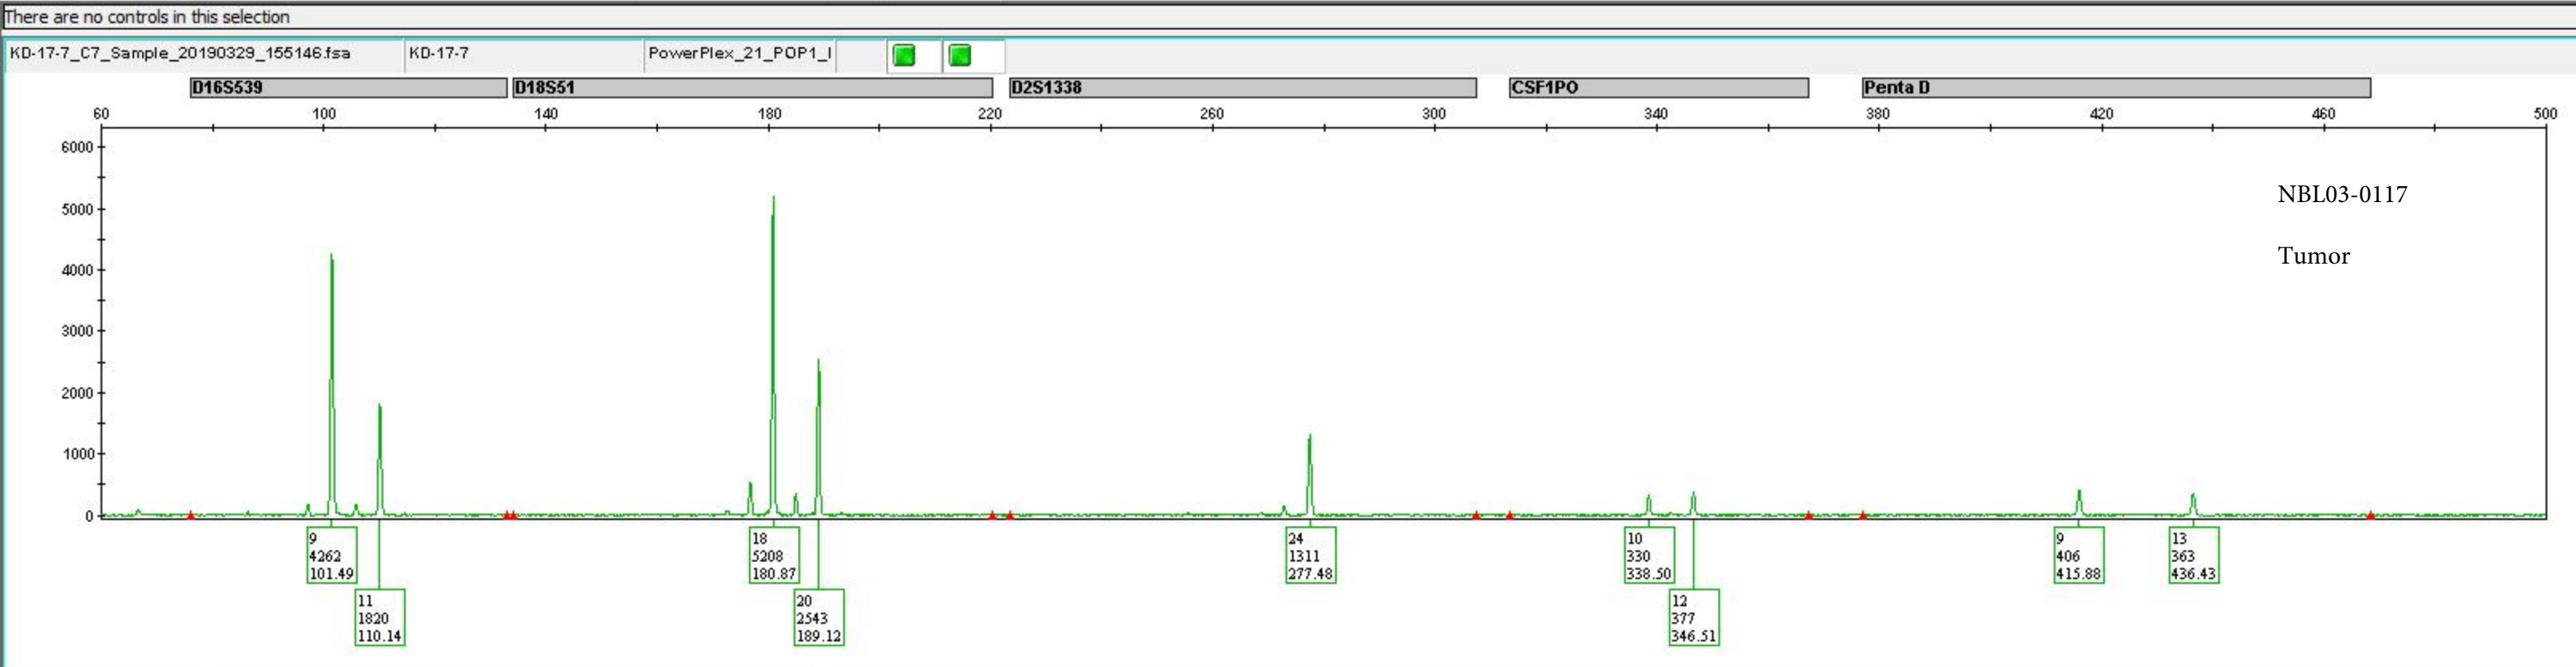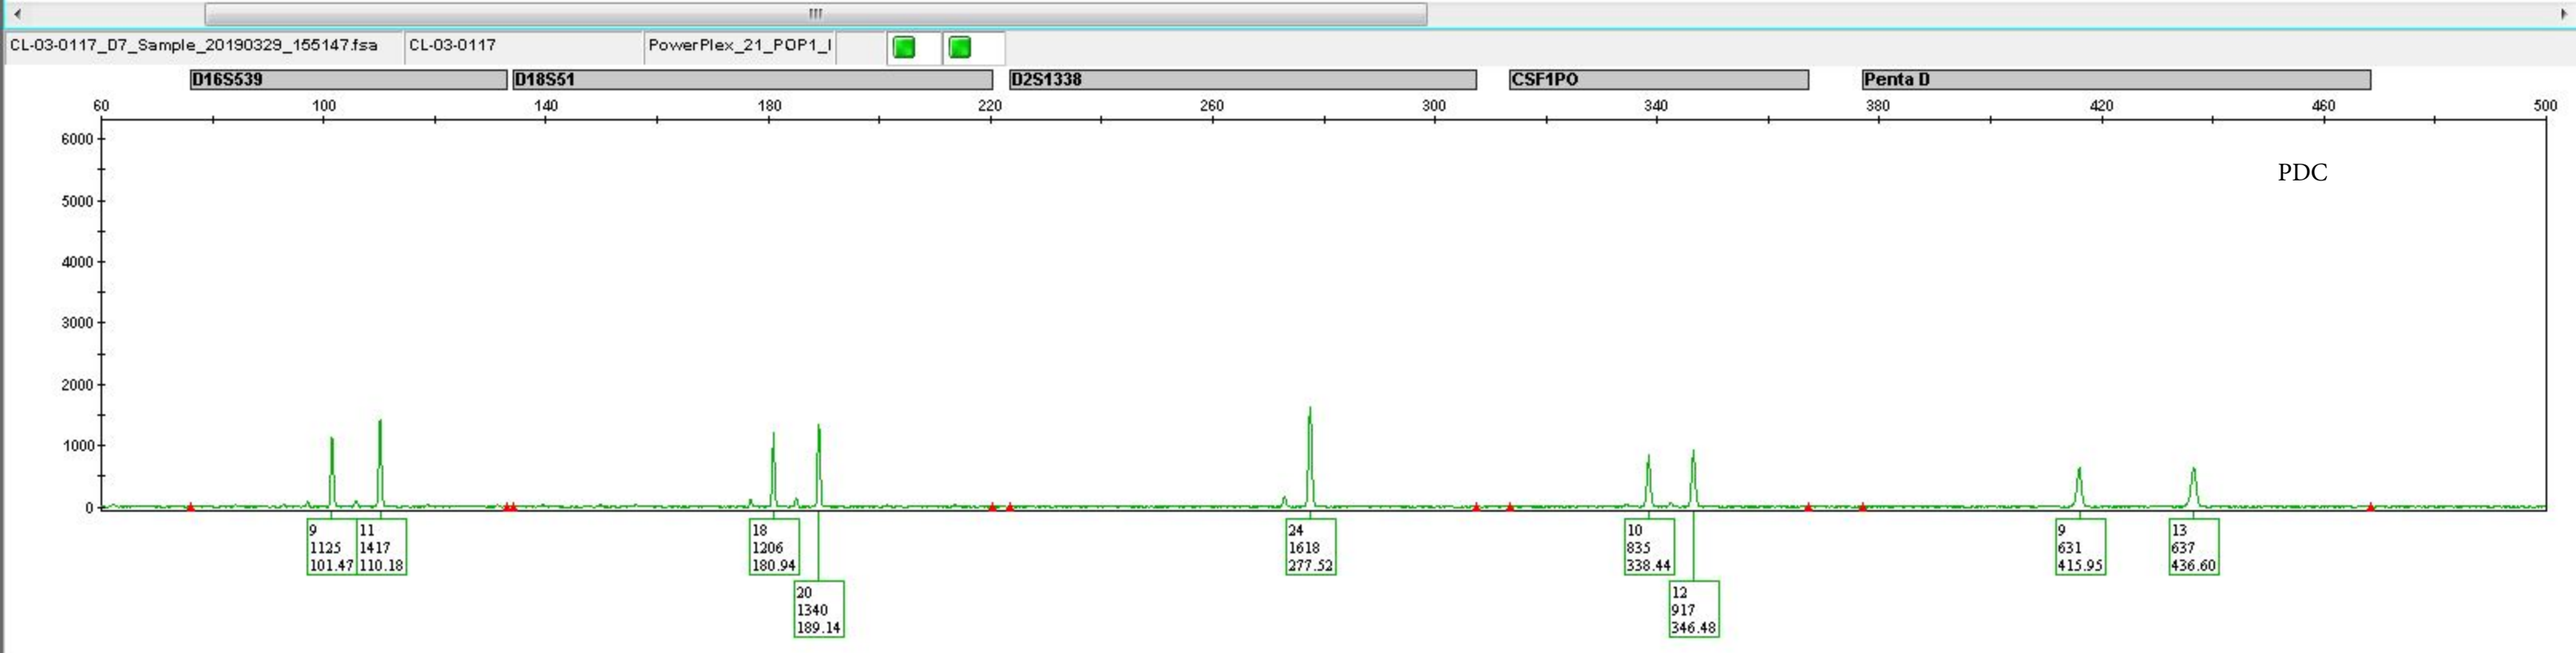

There are no controls in this selection

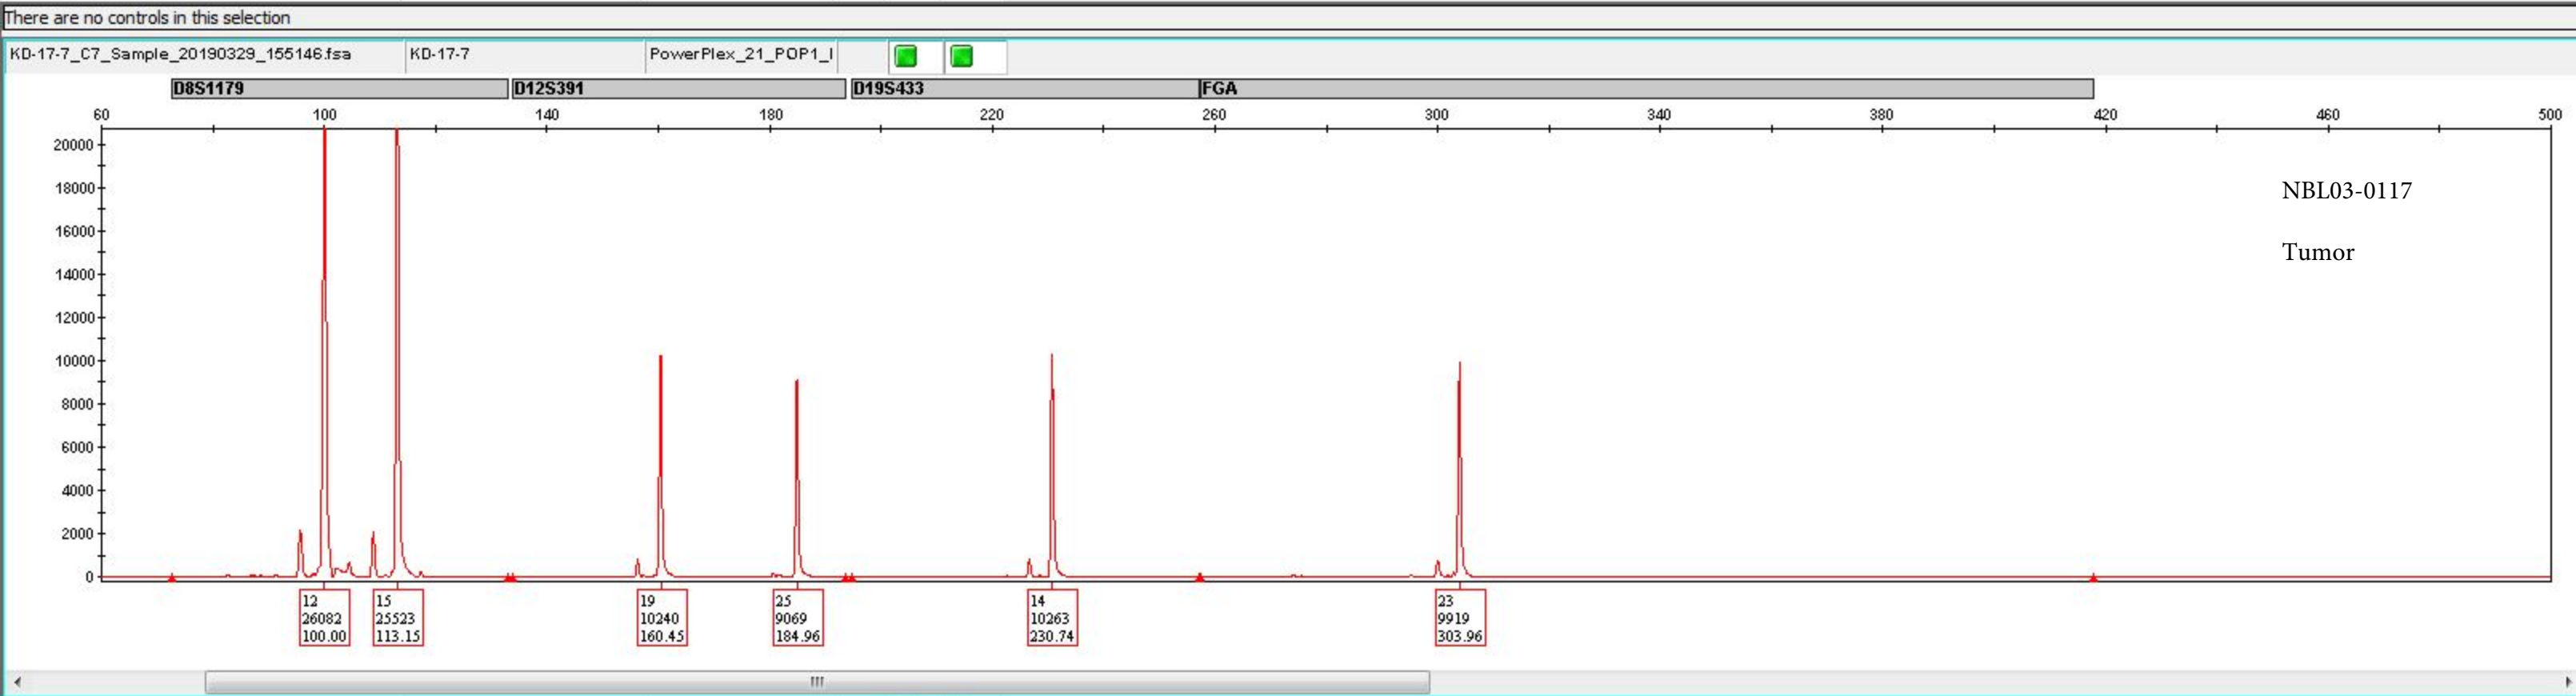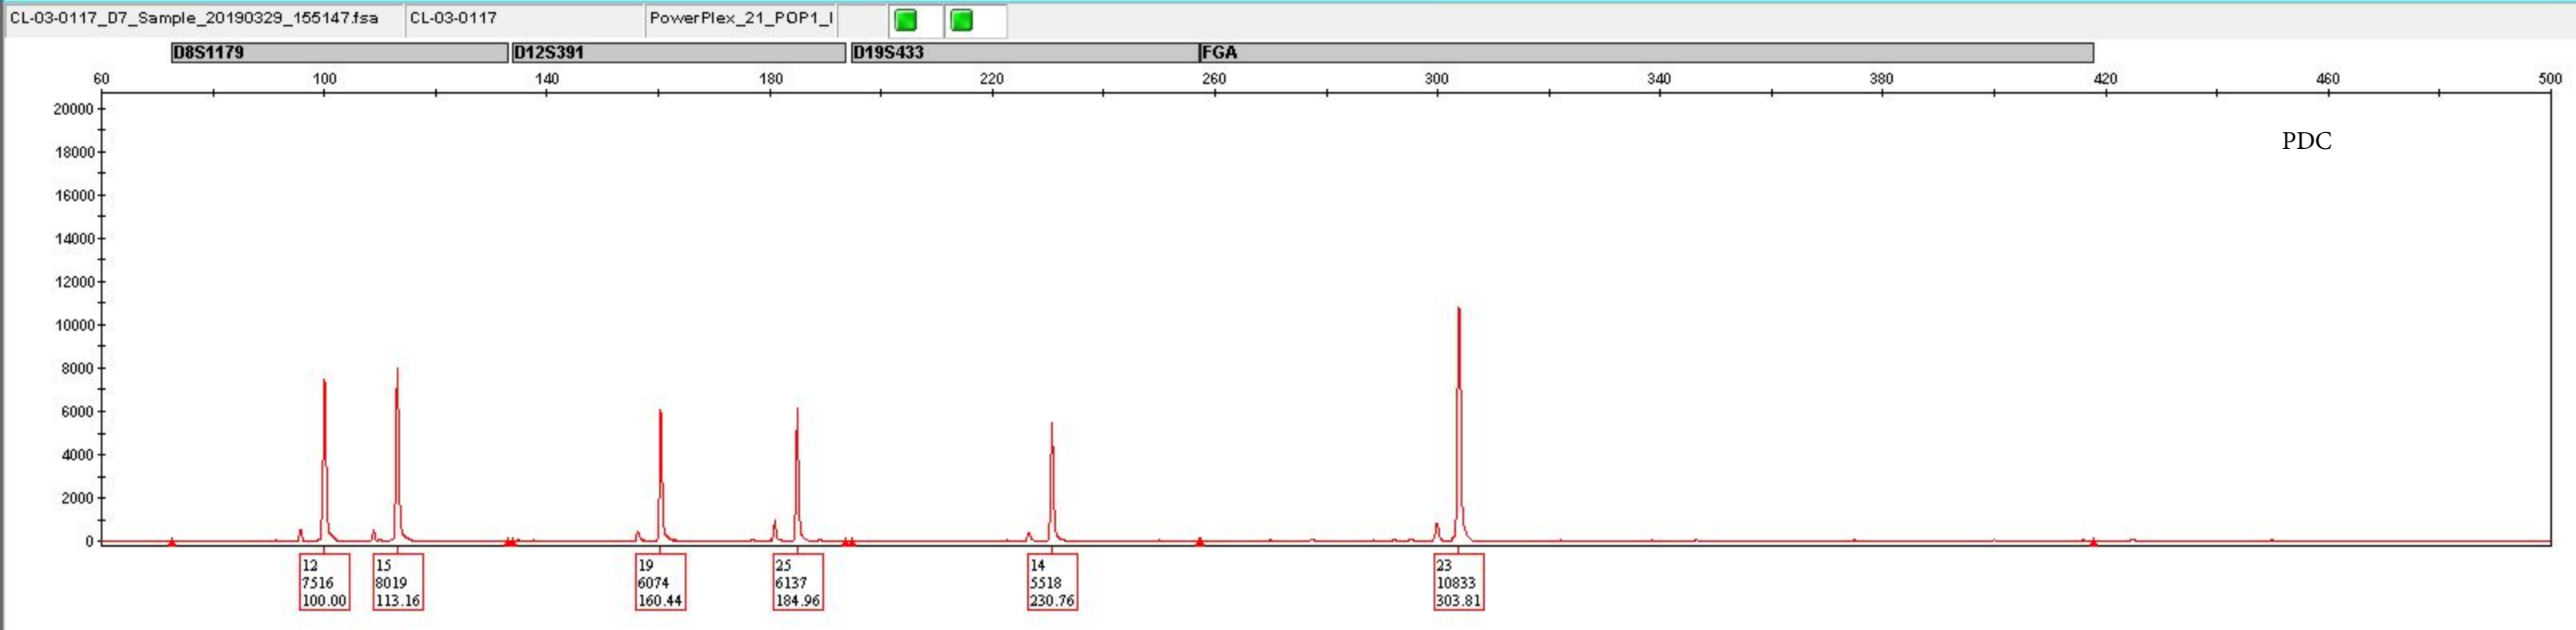

There are no controls in this selection

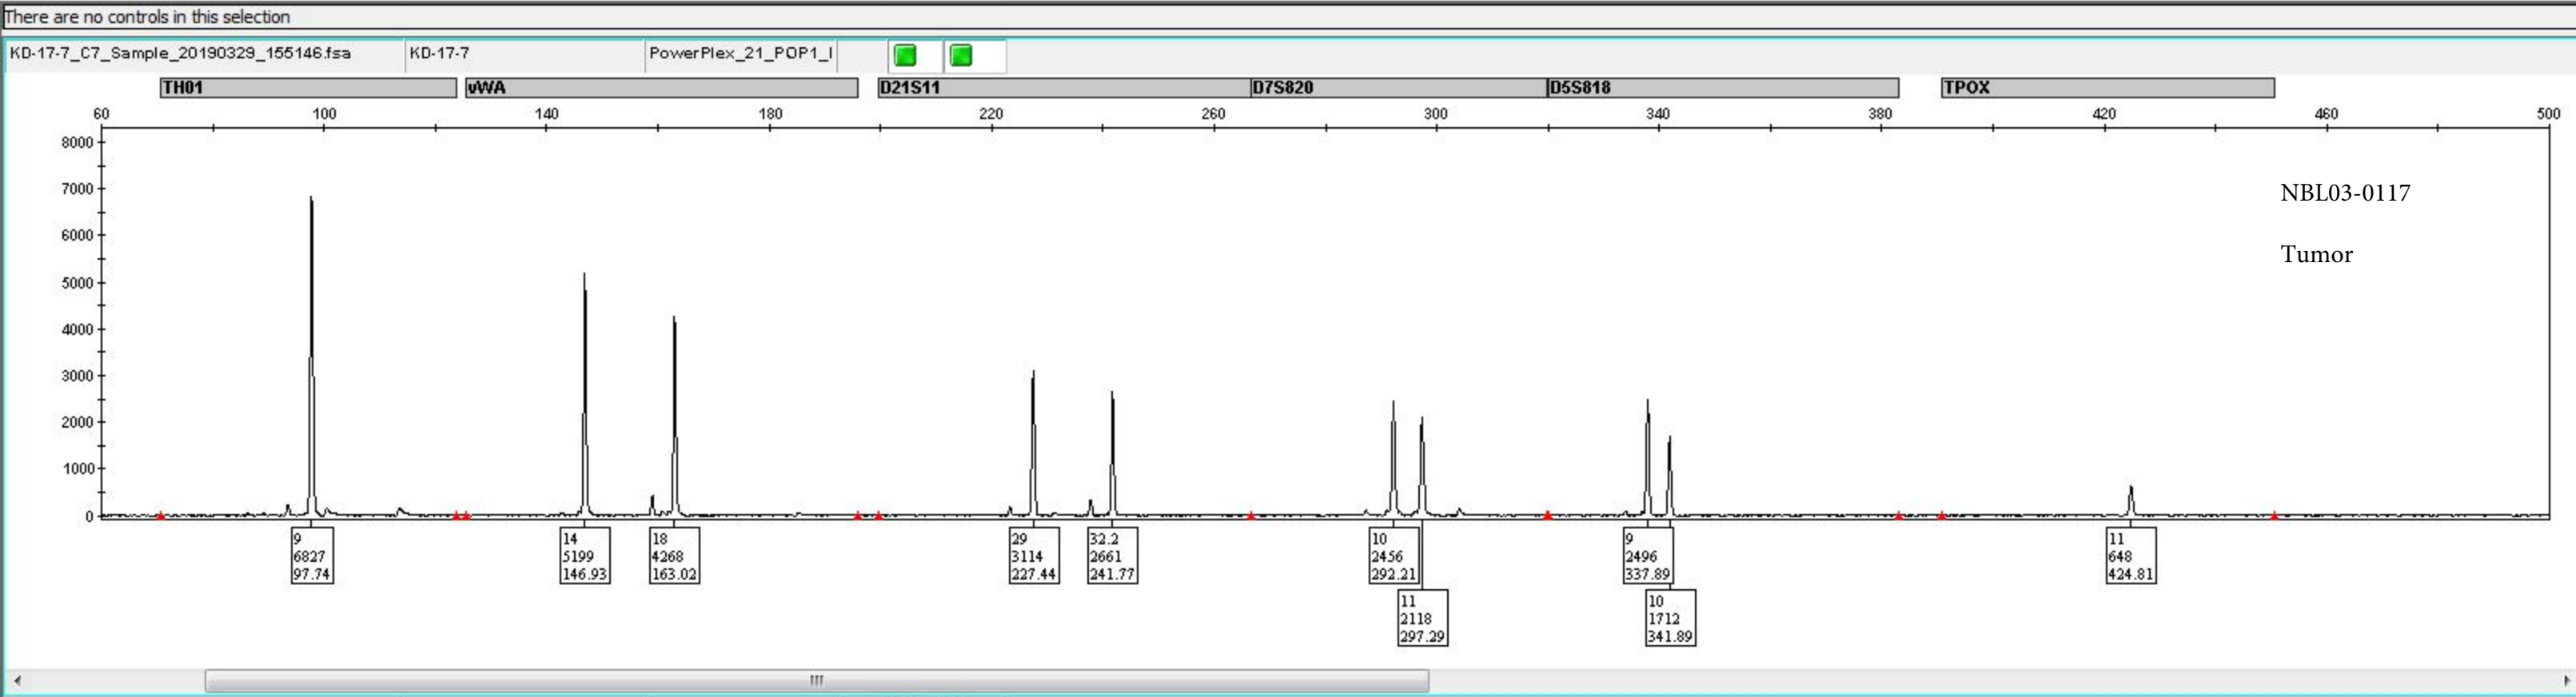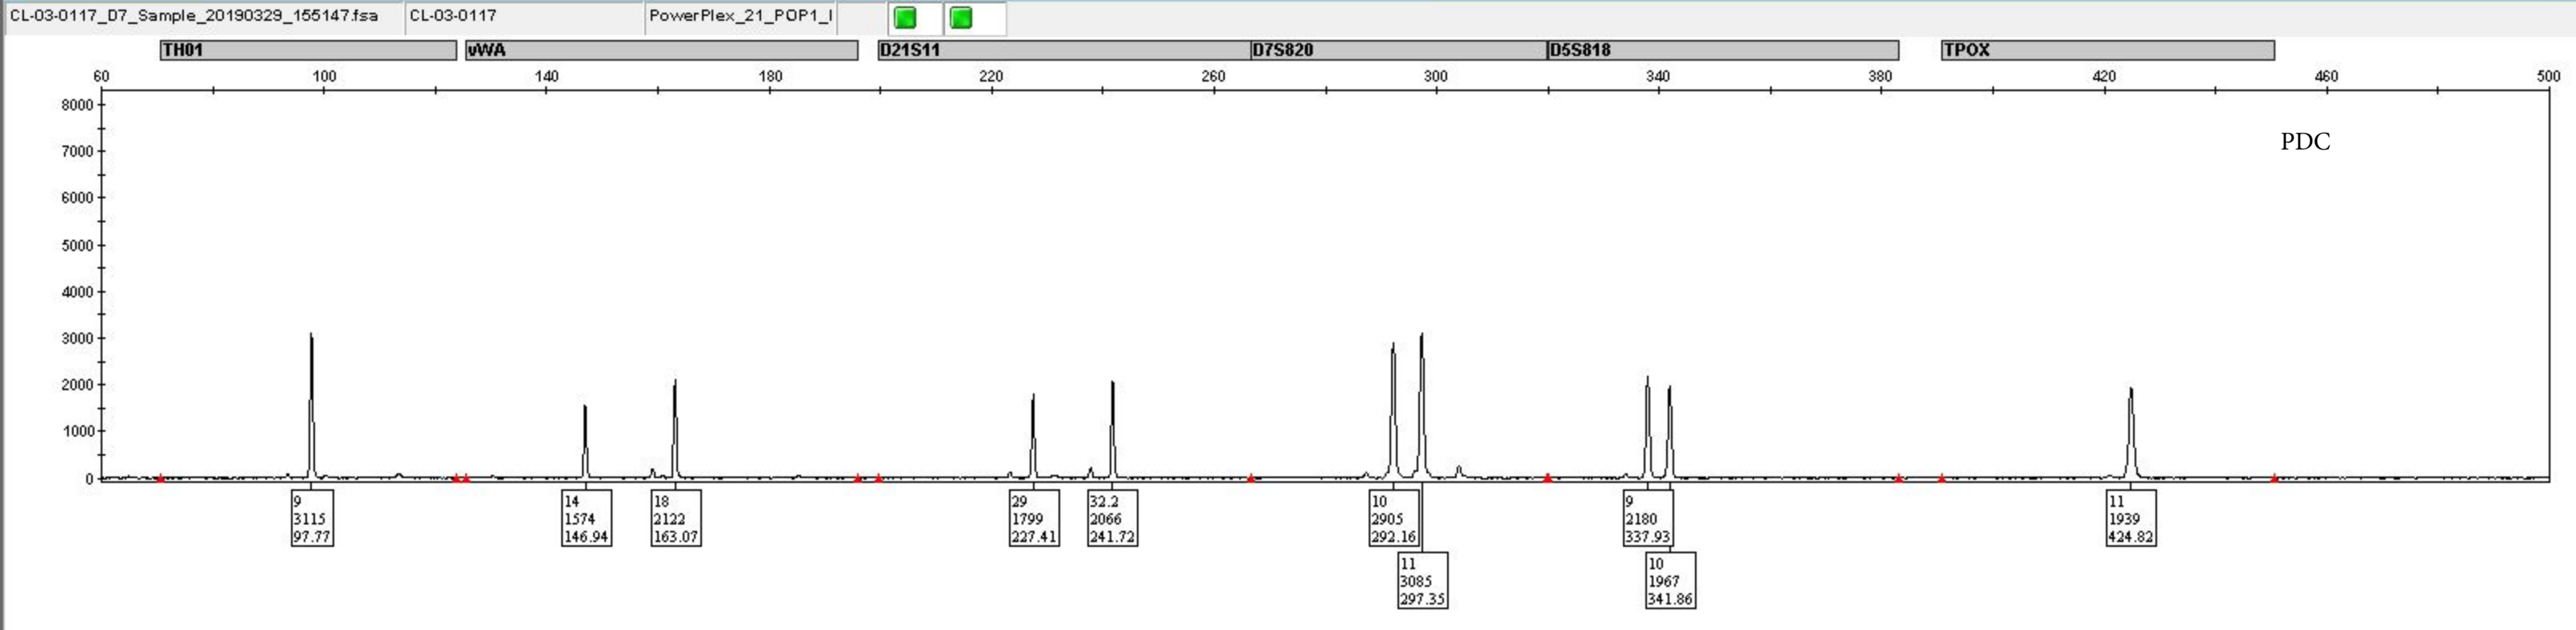

There are no controls in this selection

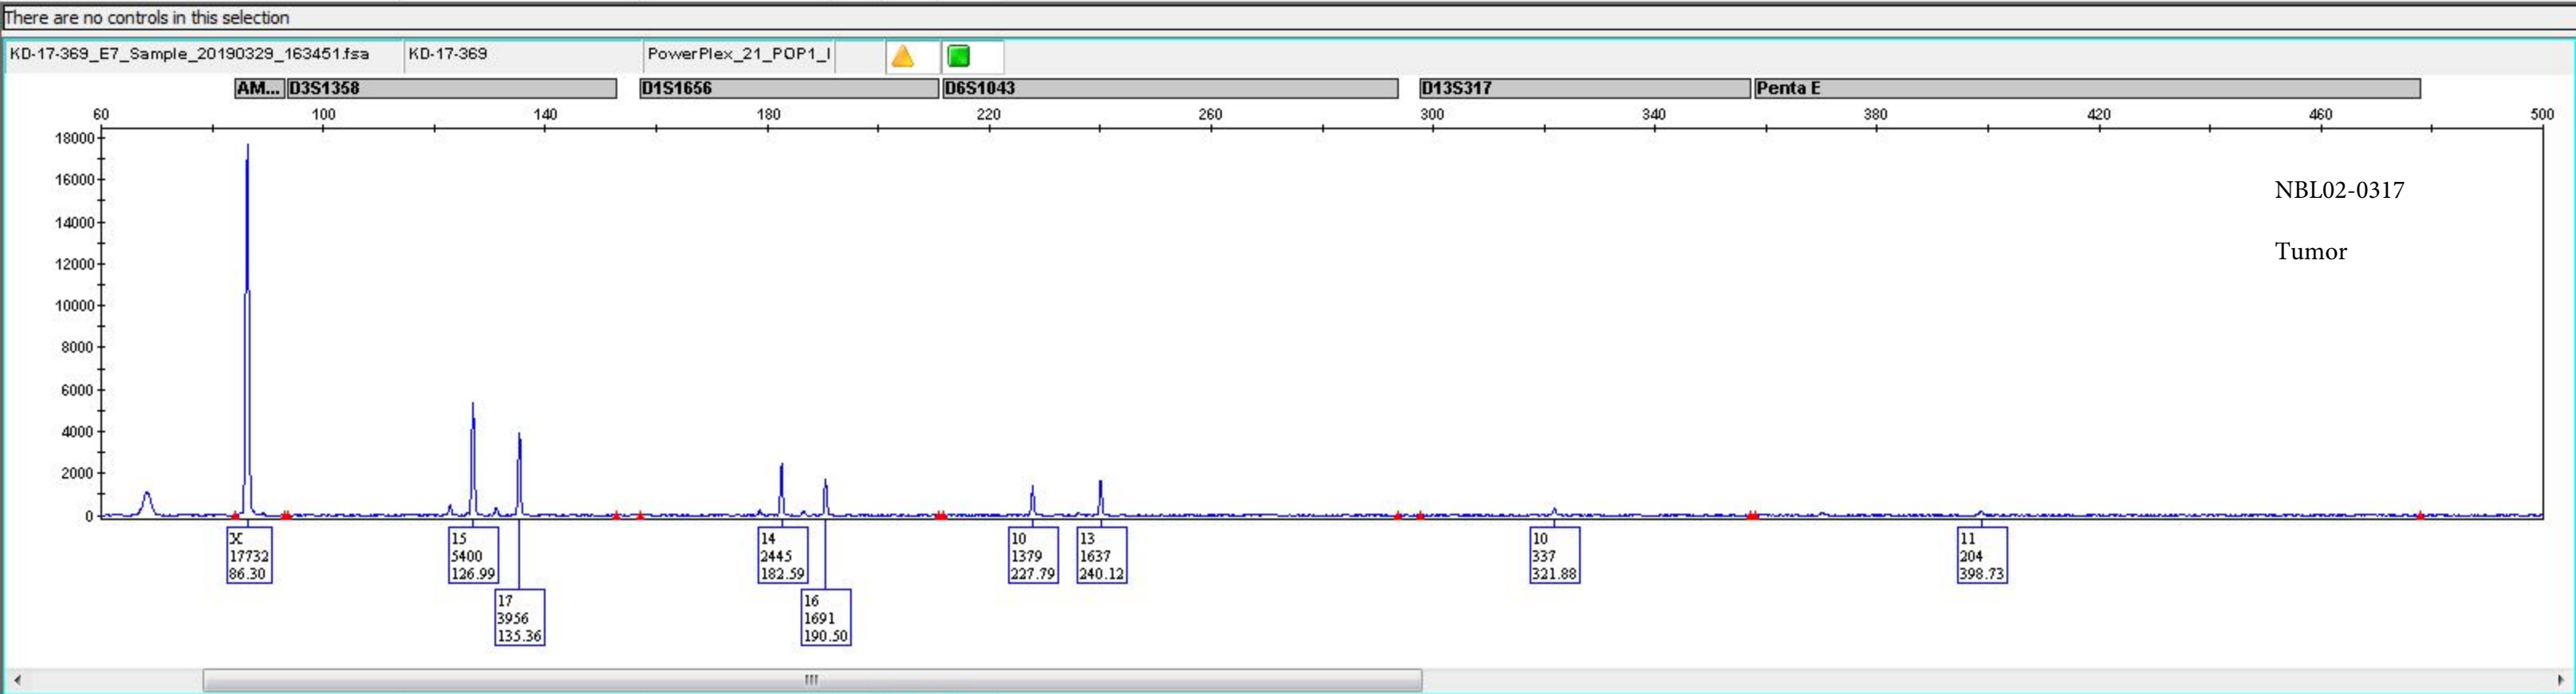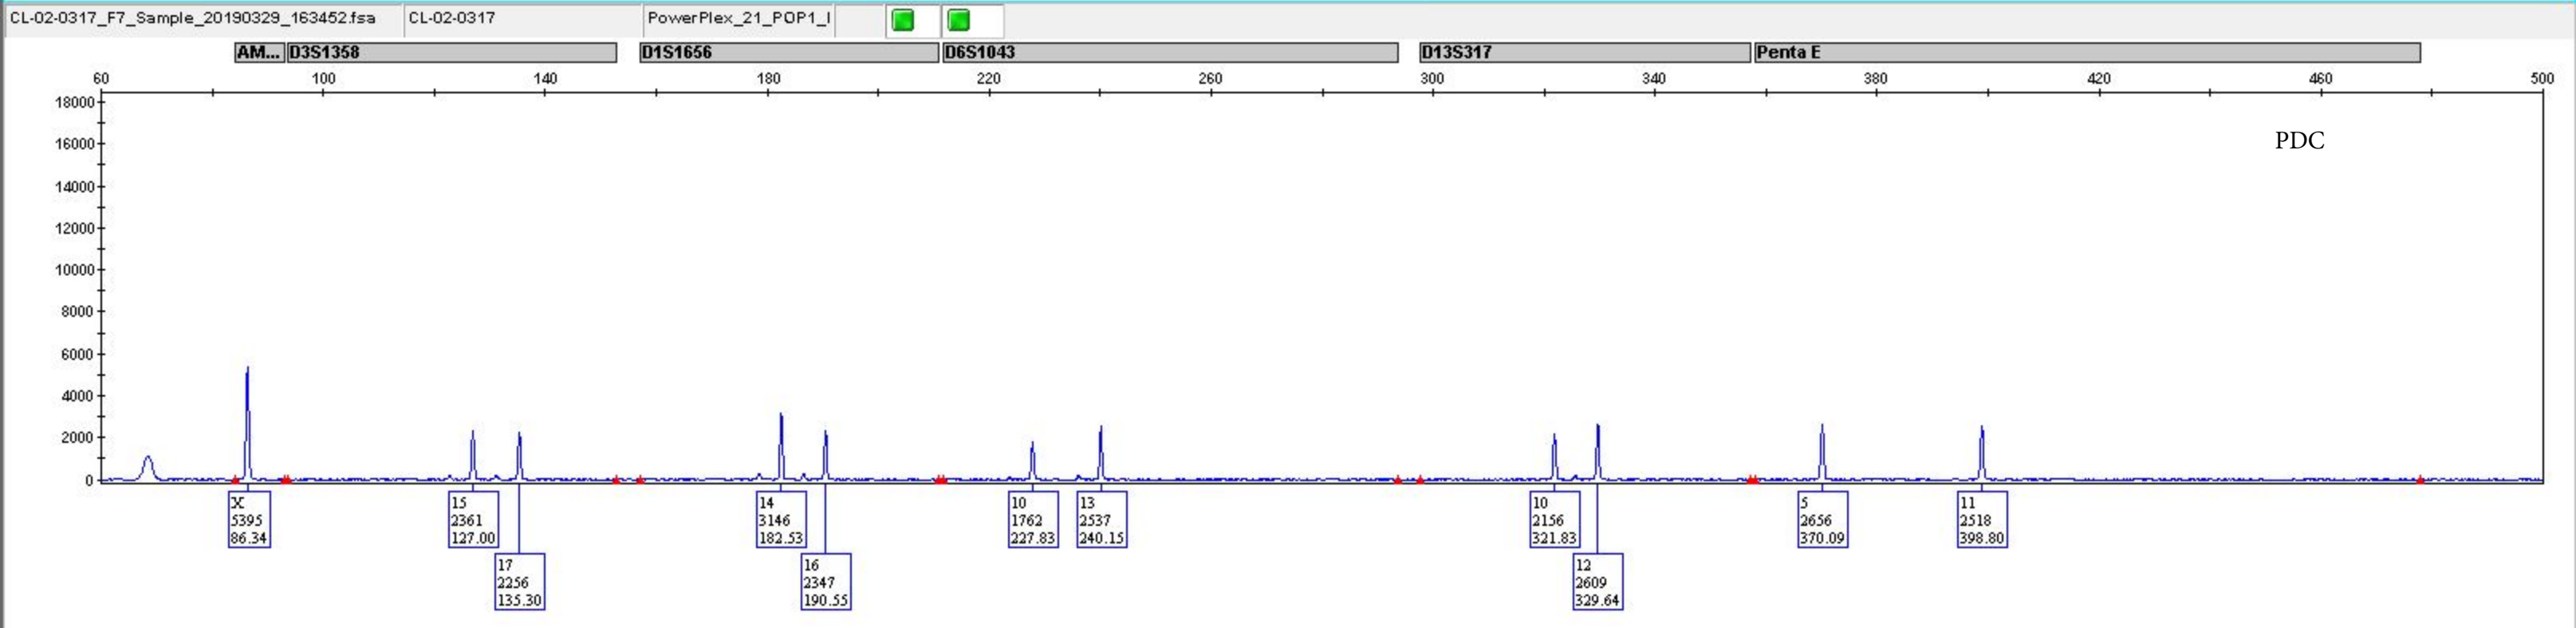

There are no controls in this selection

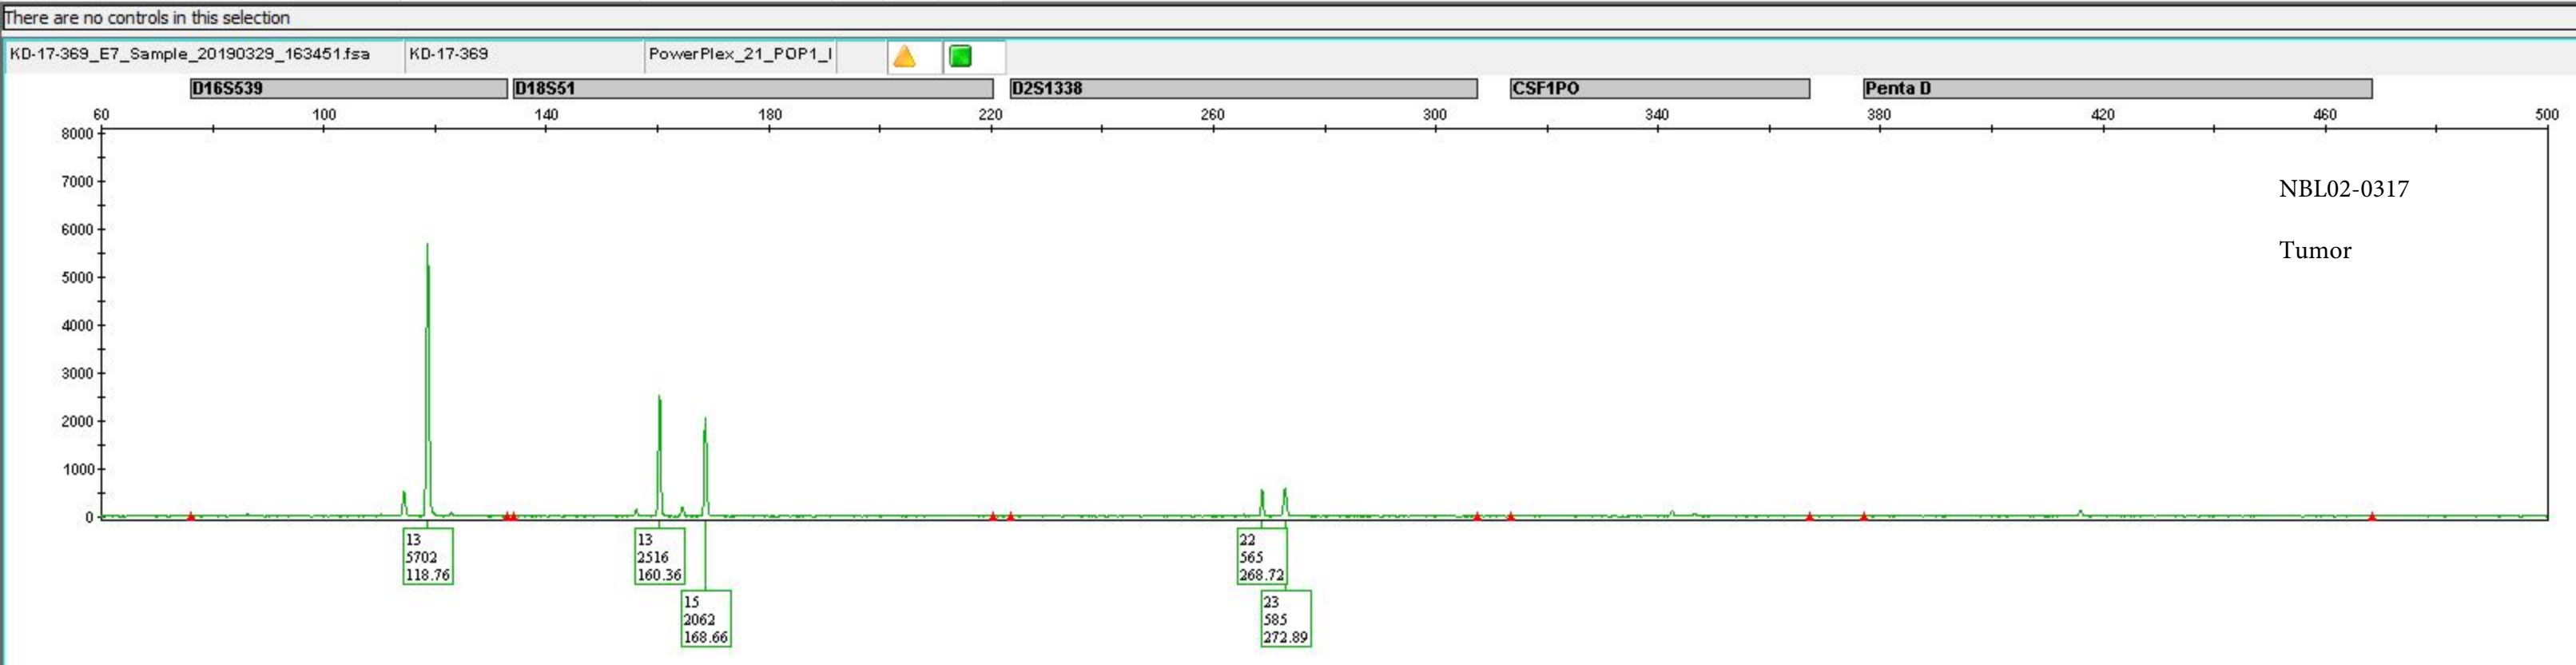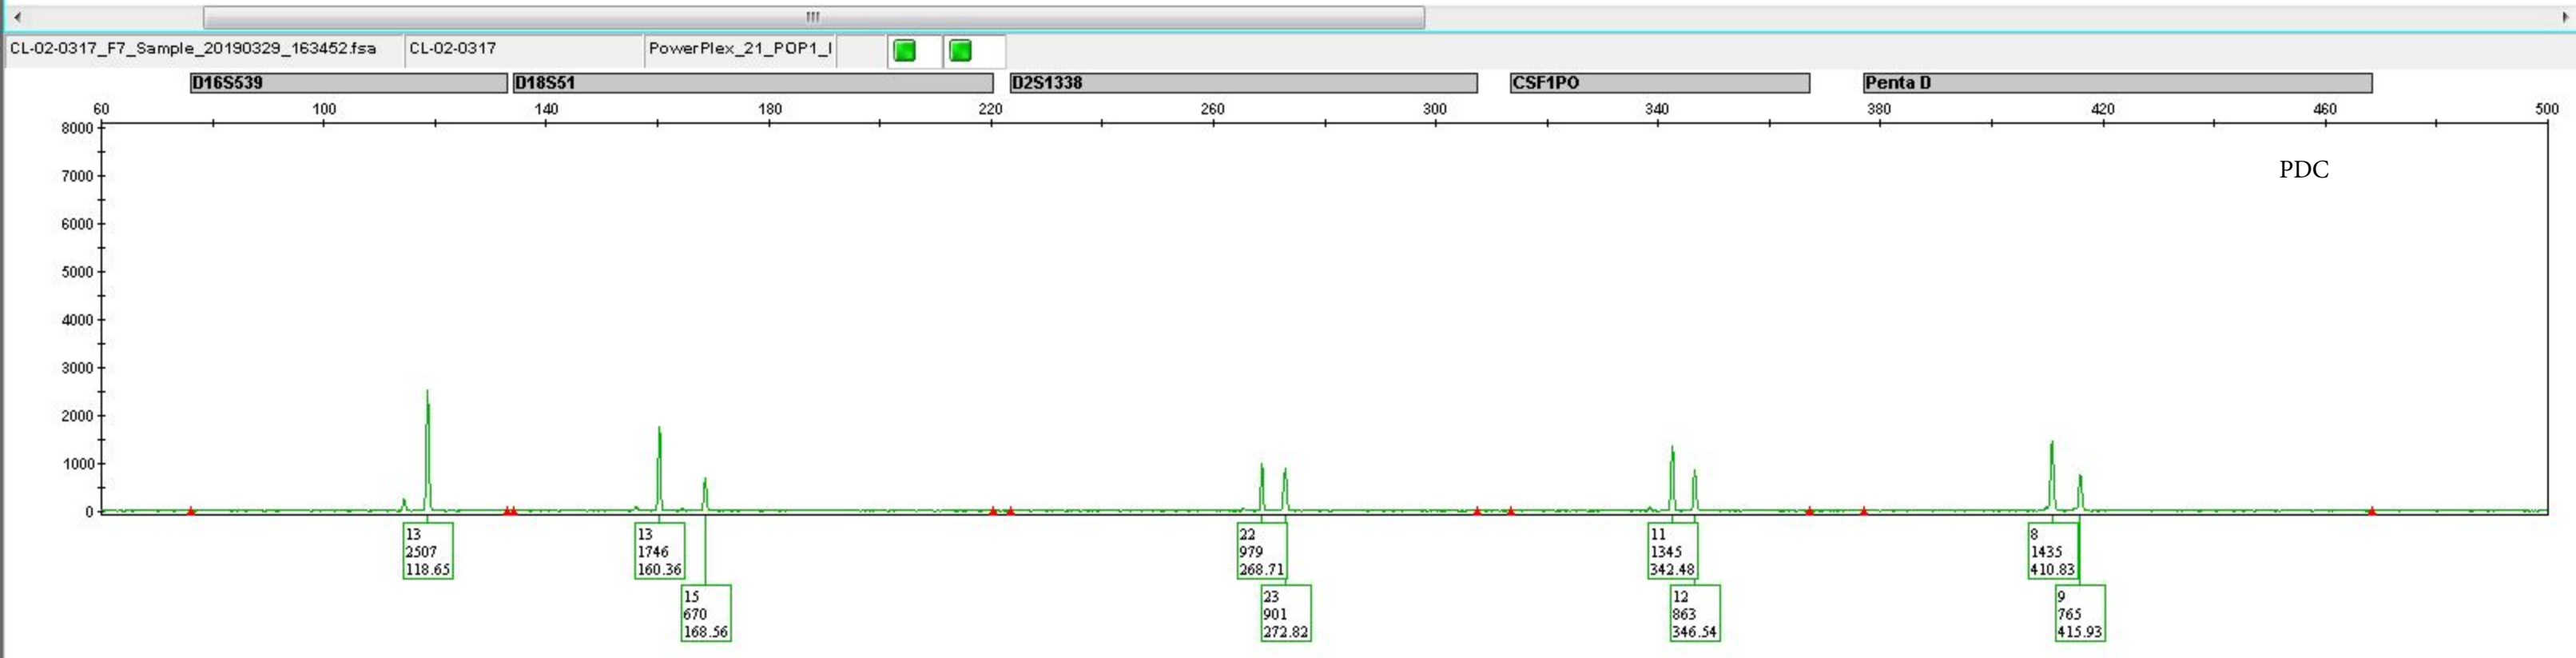

There are no controls in this selection

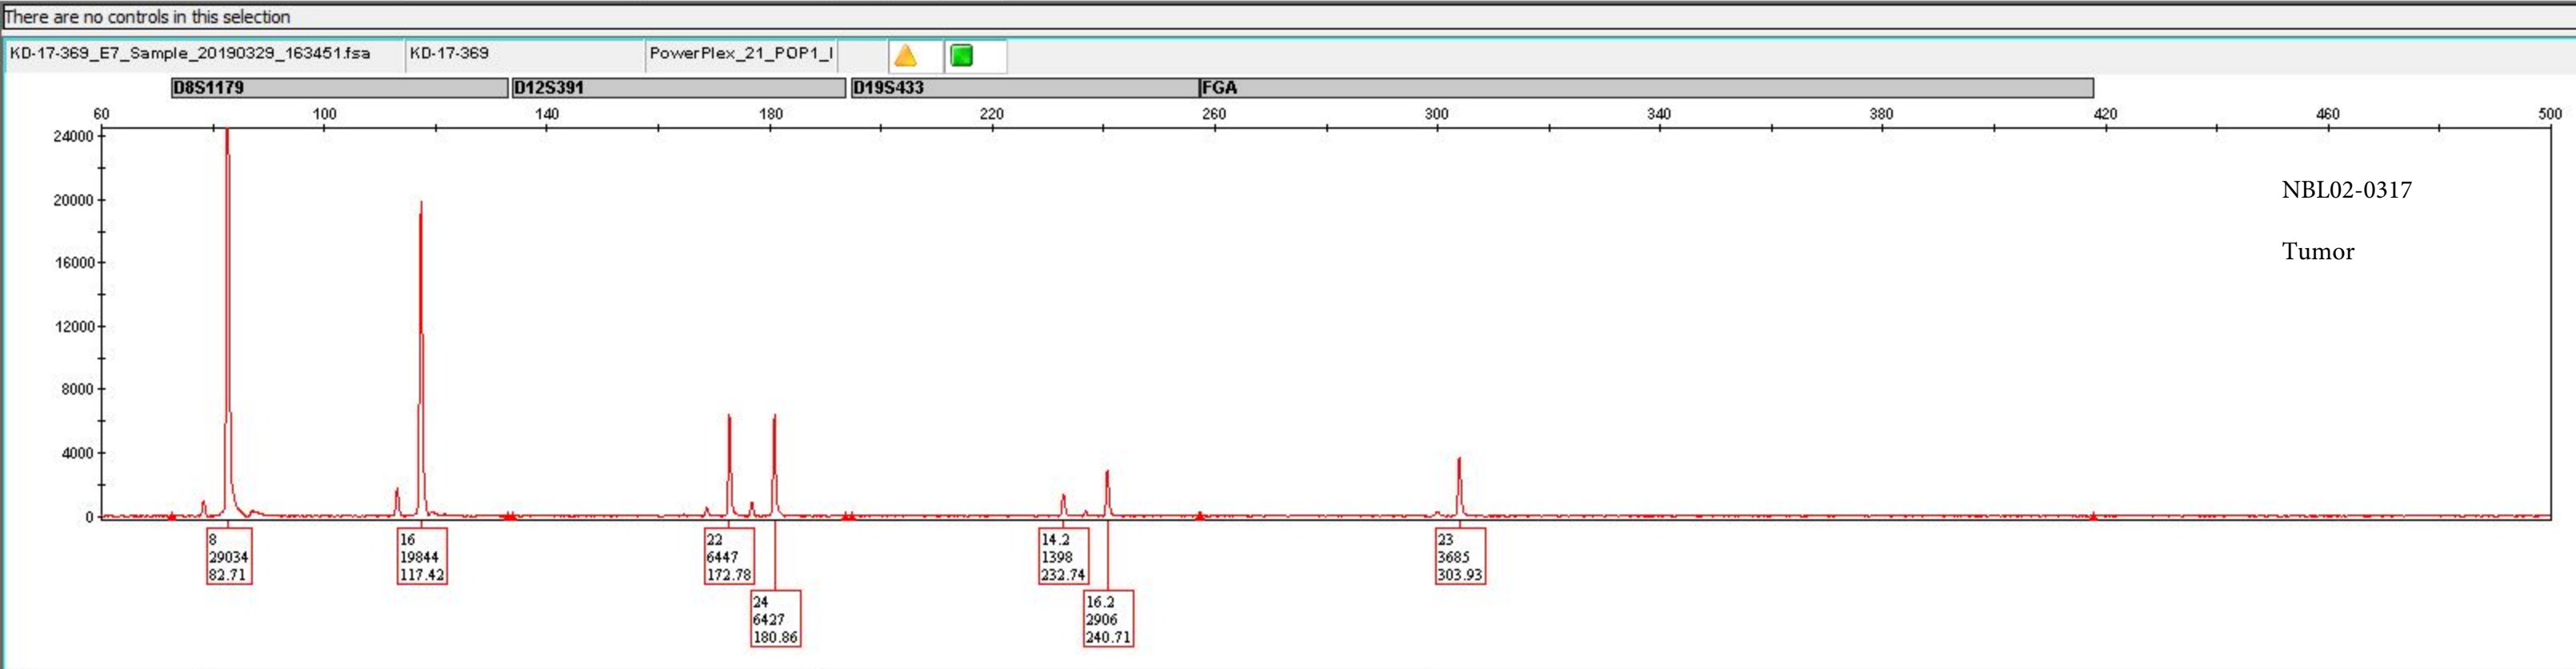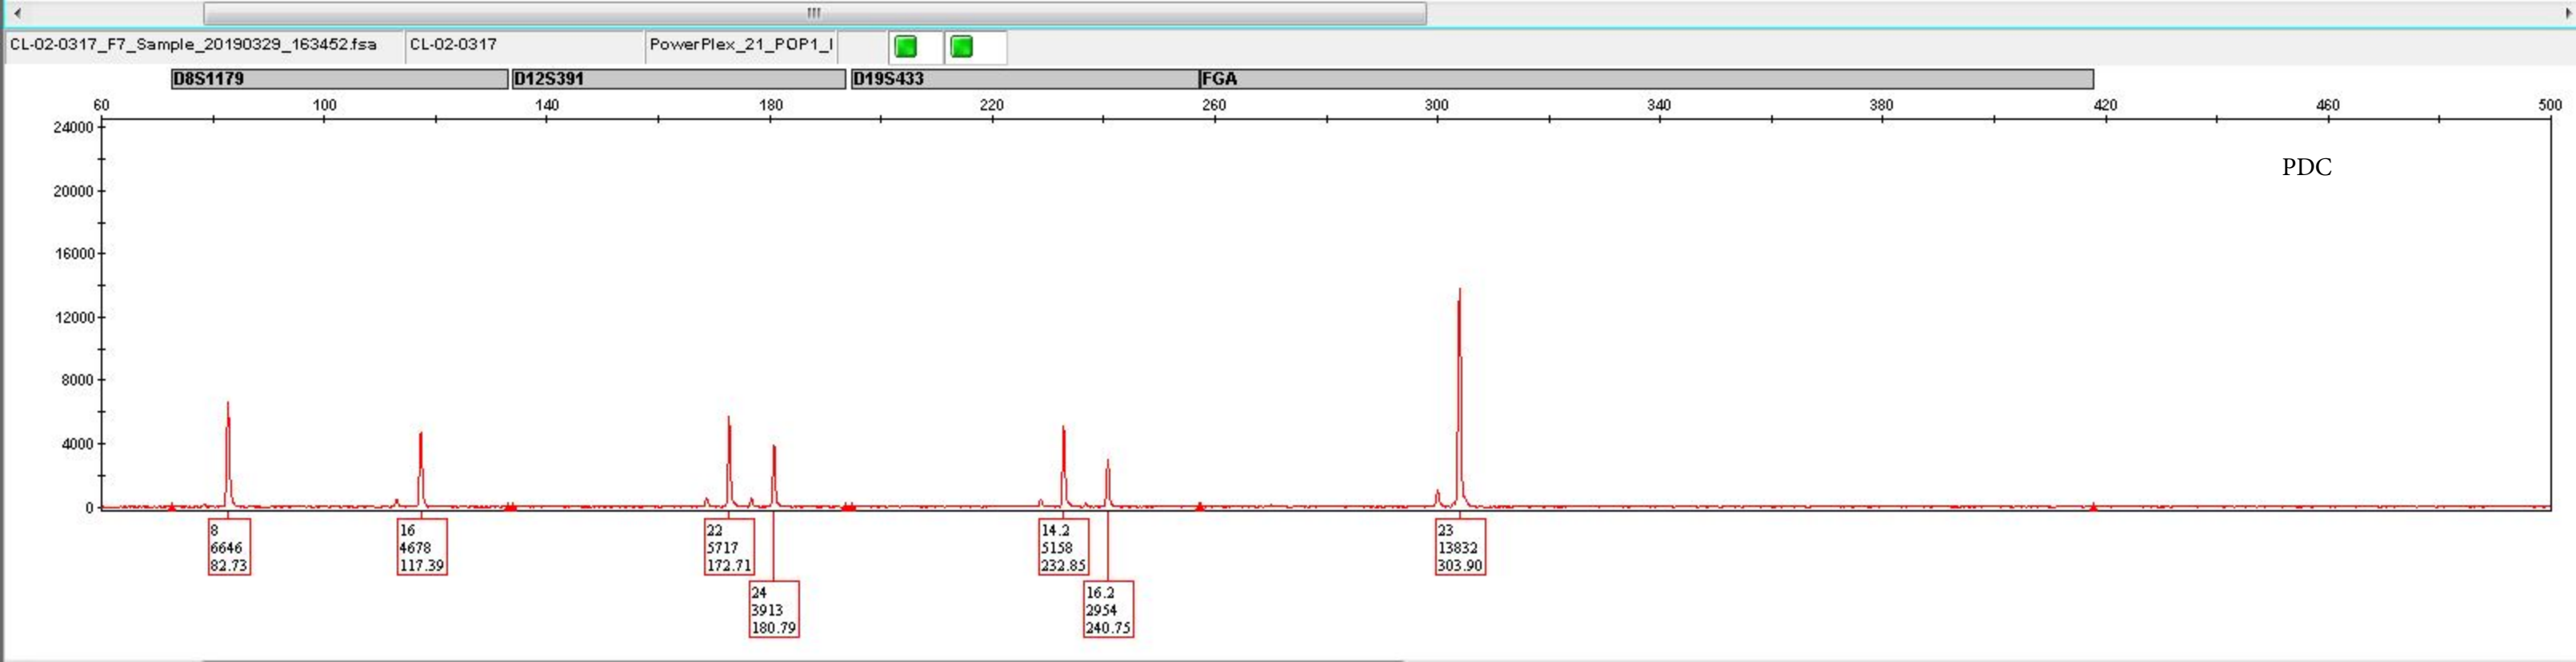

There are no controls in this selection

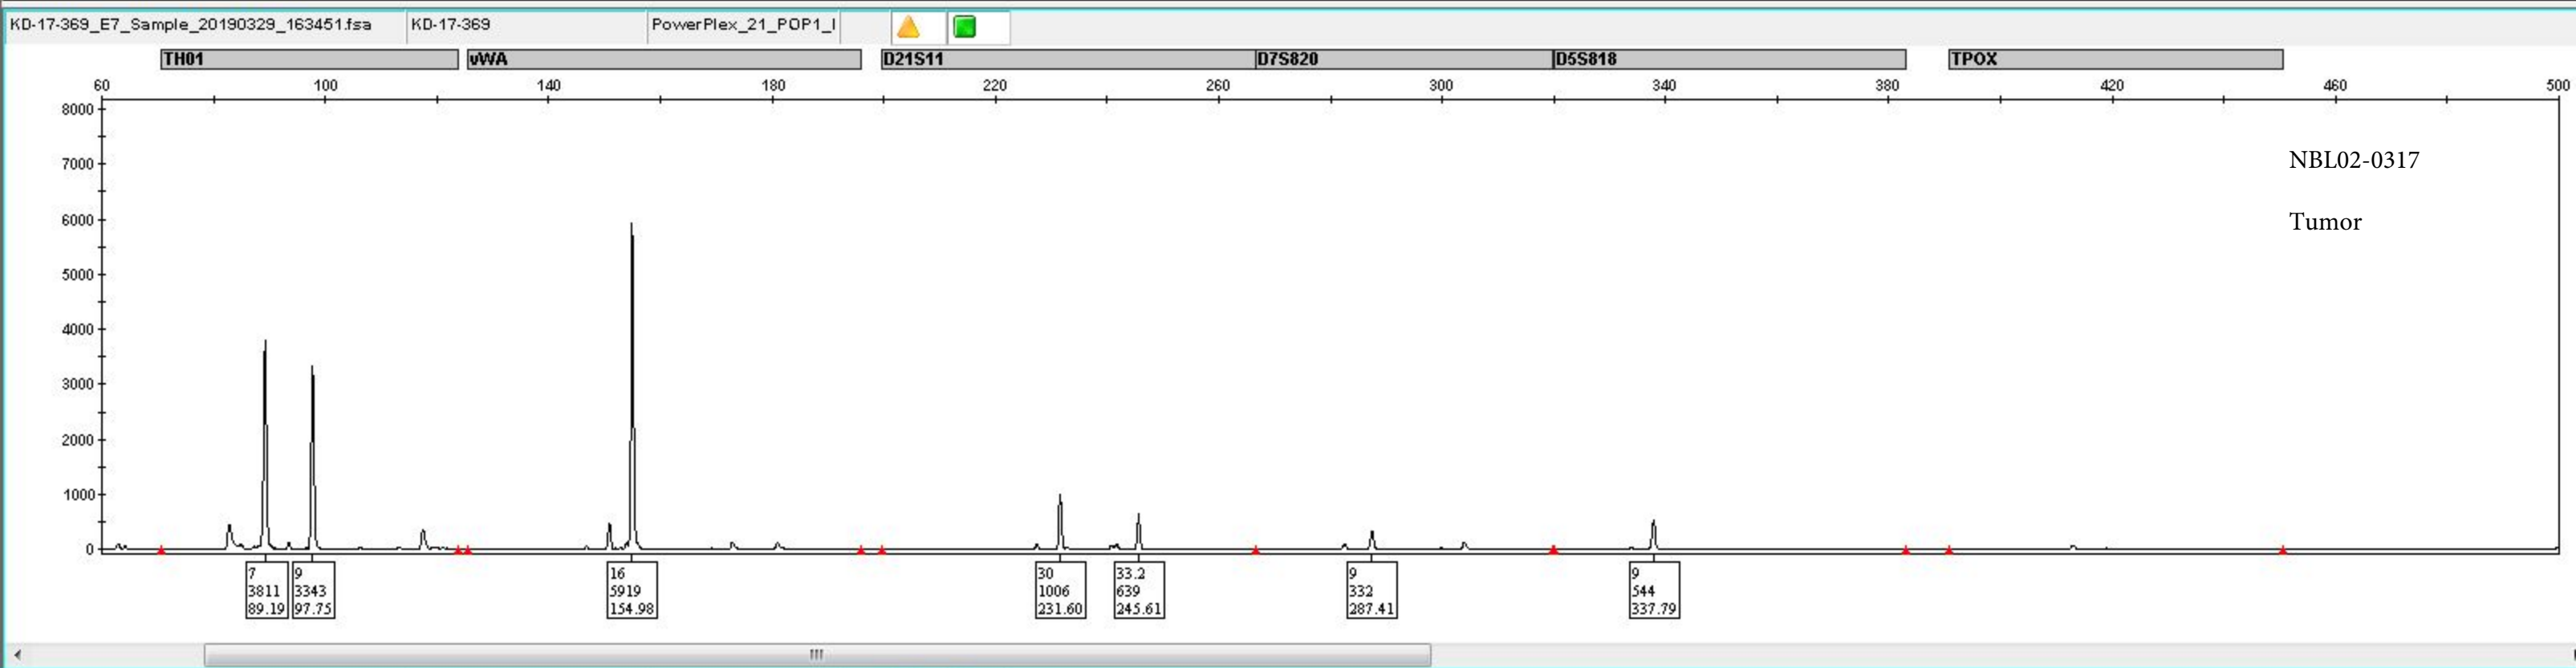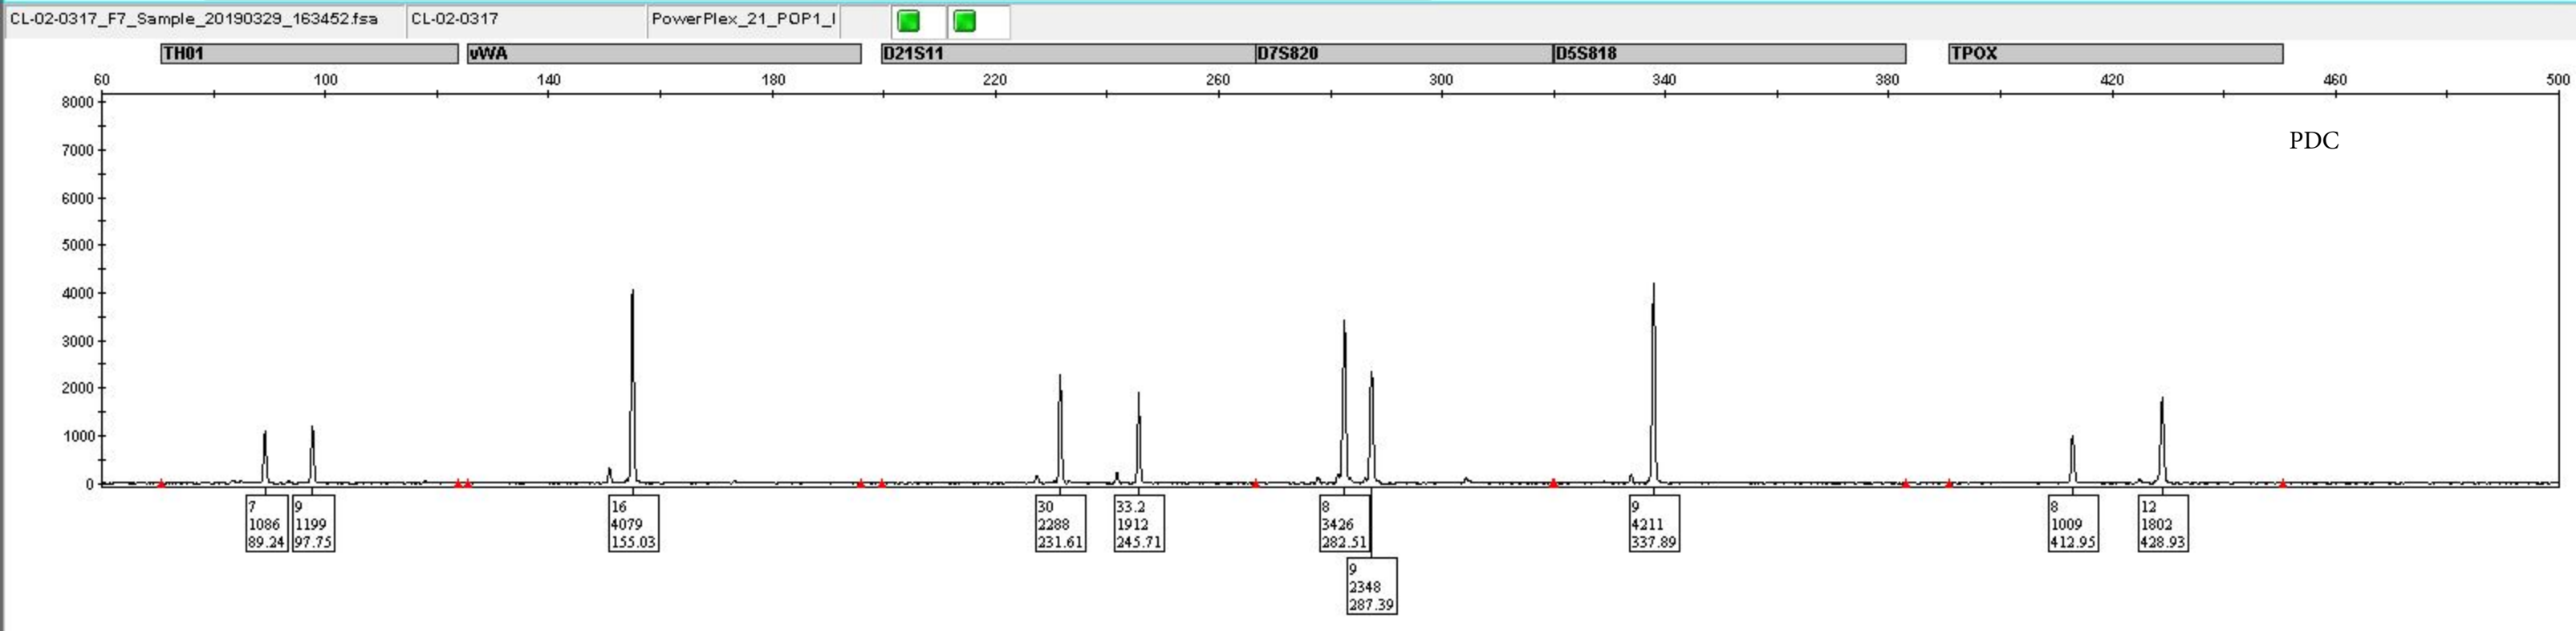



There are no controls in this selection

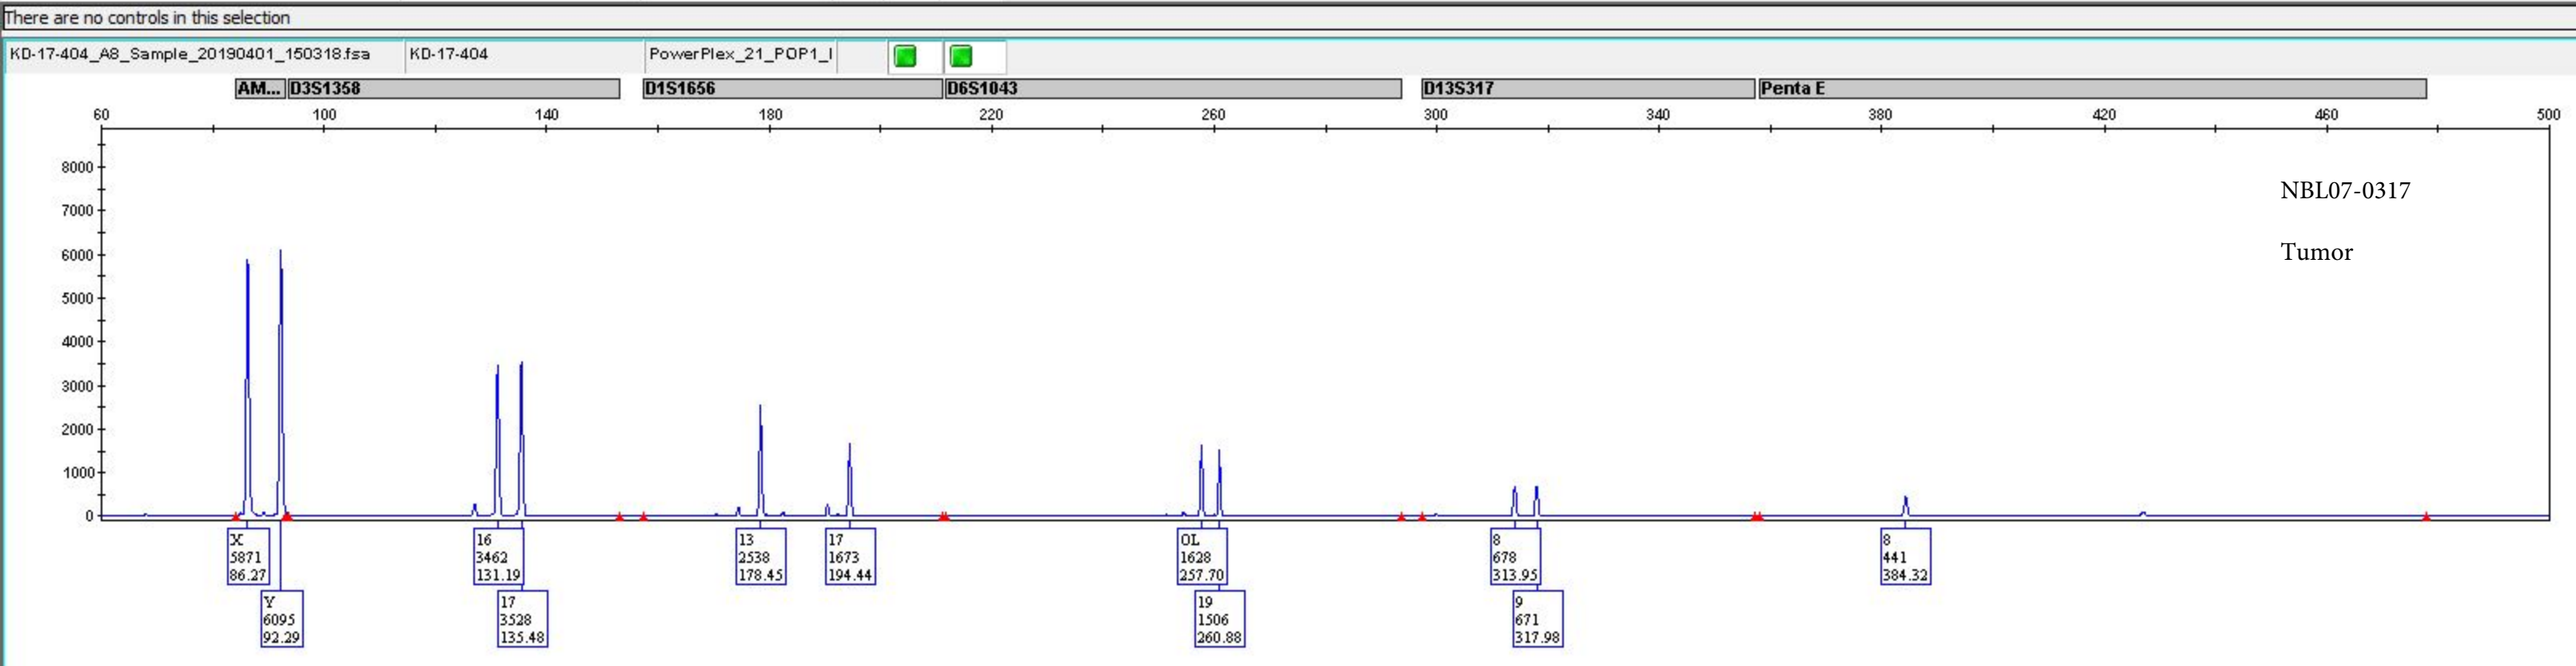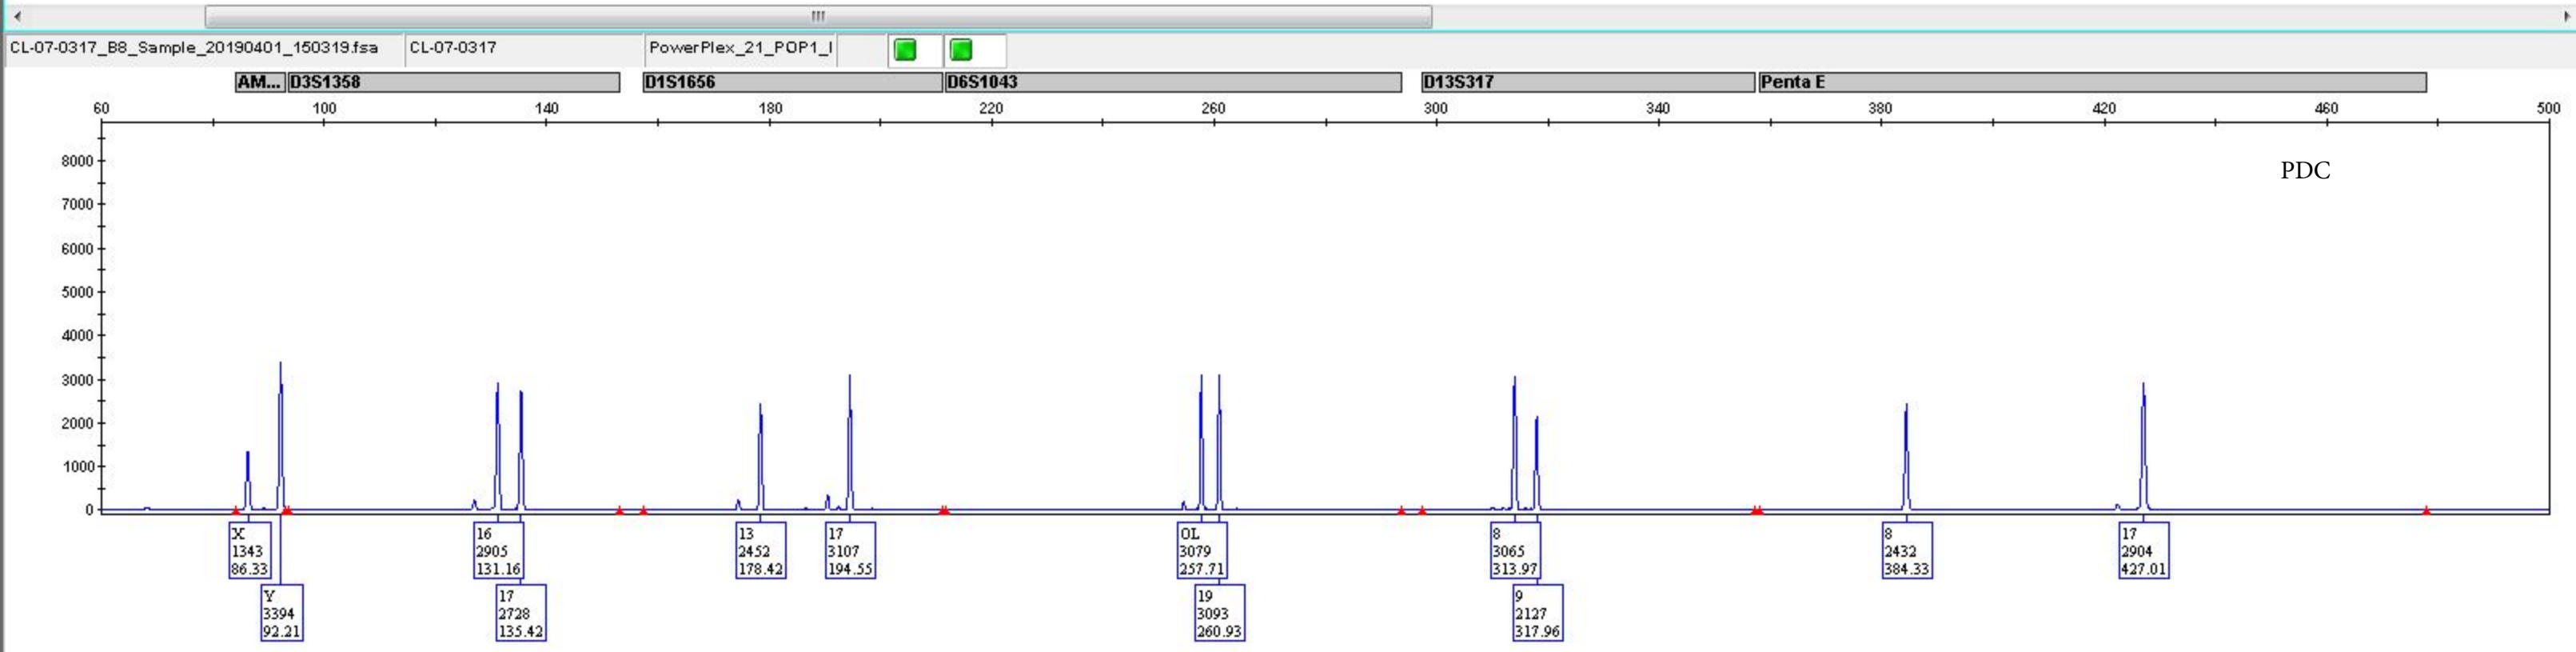

There are no controls in this selection

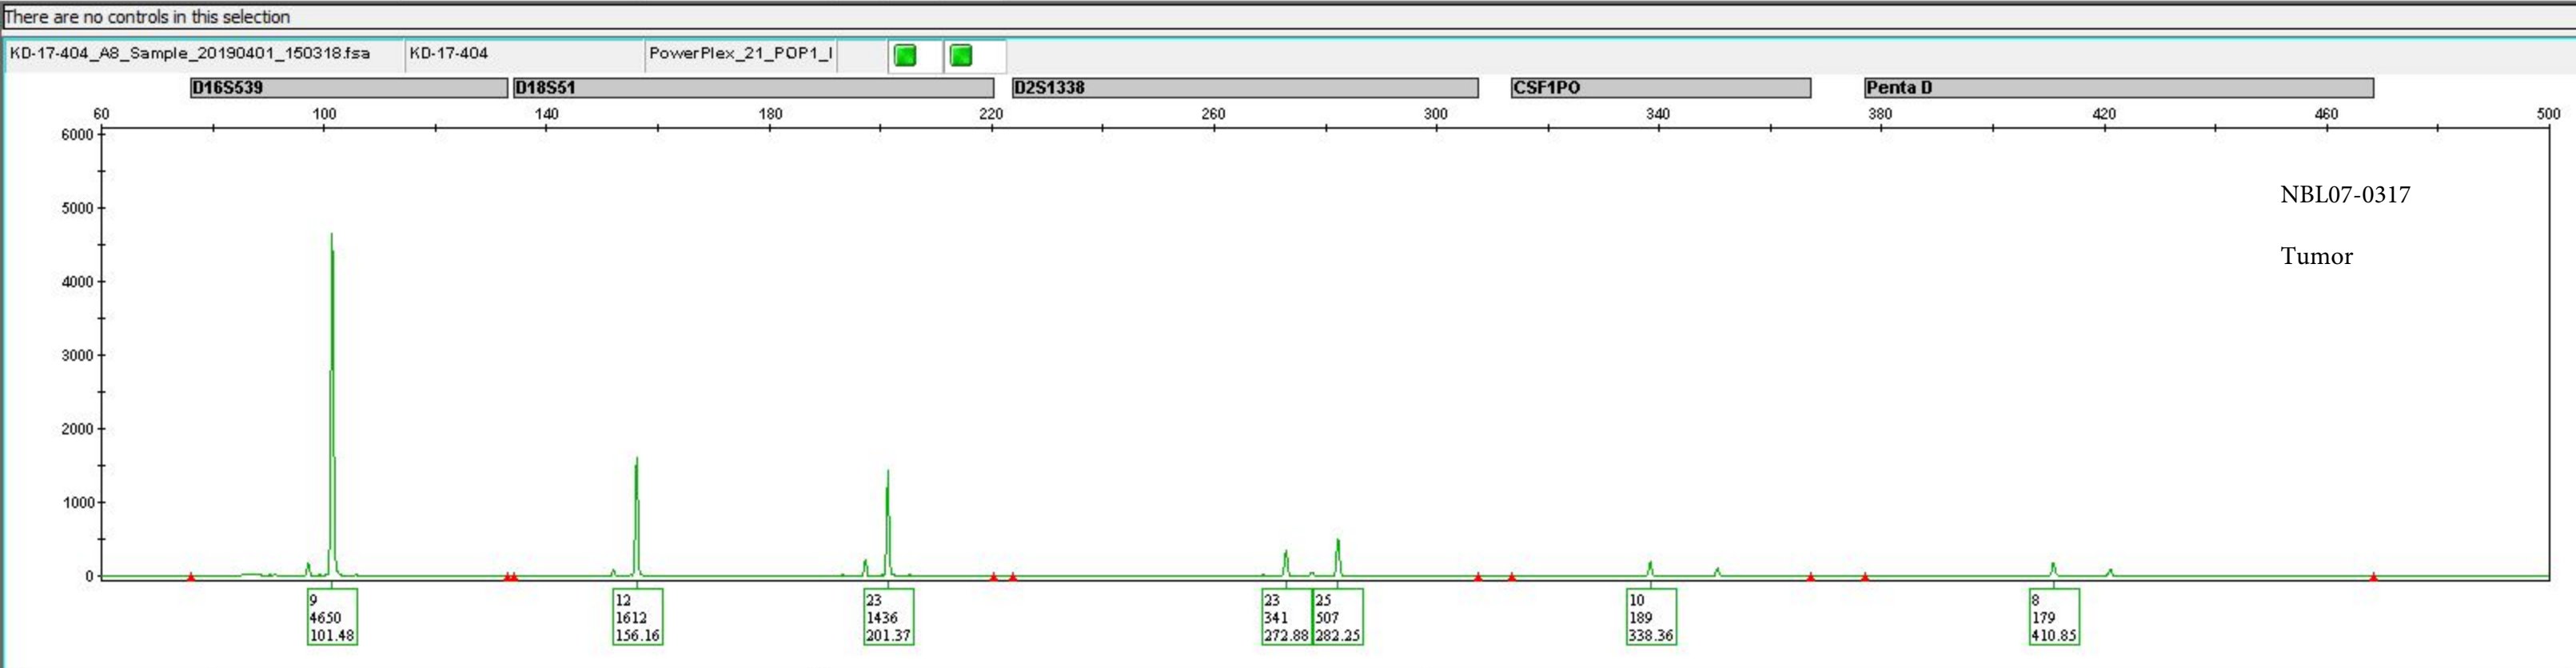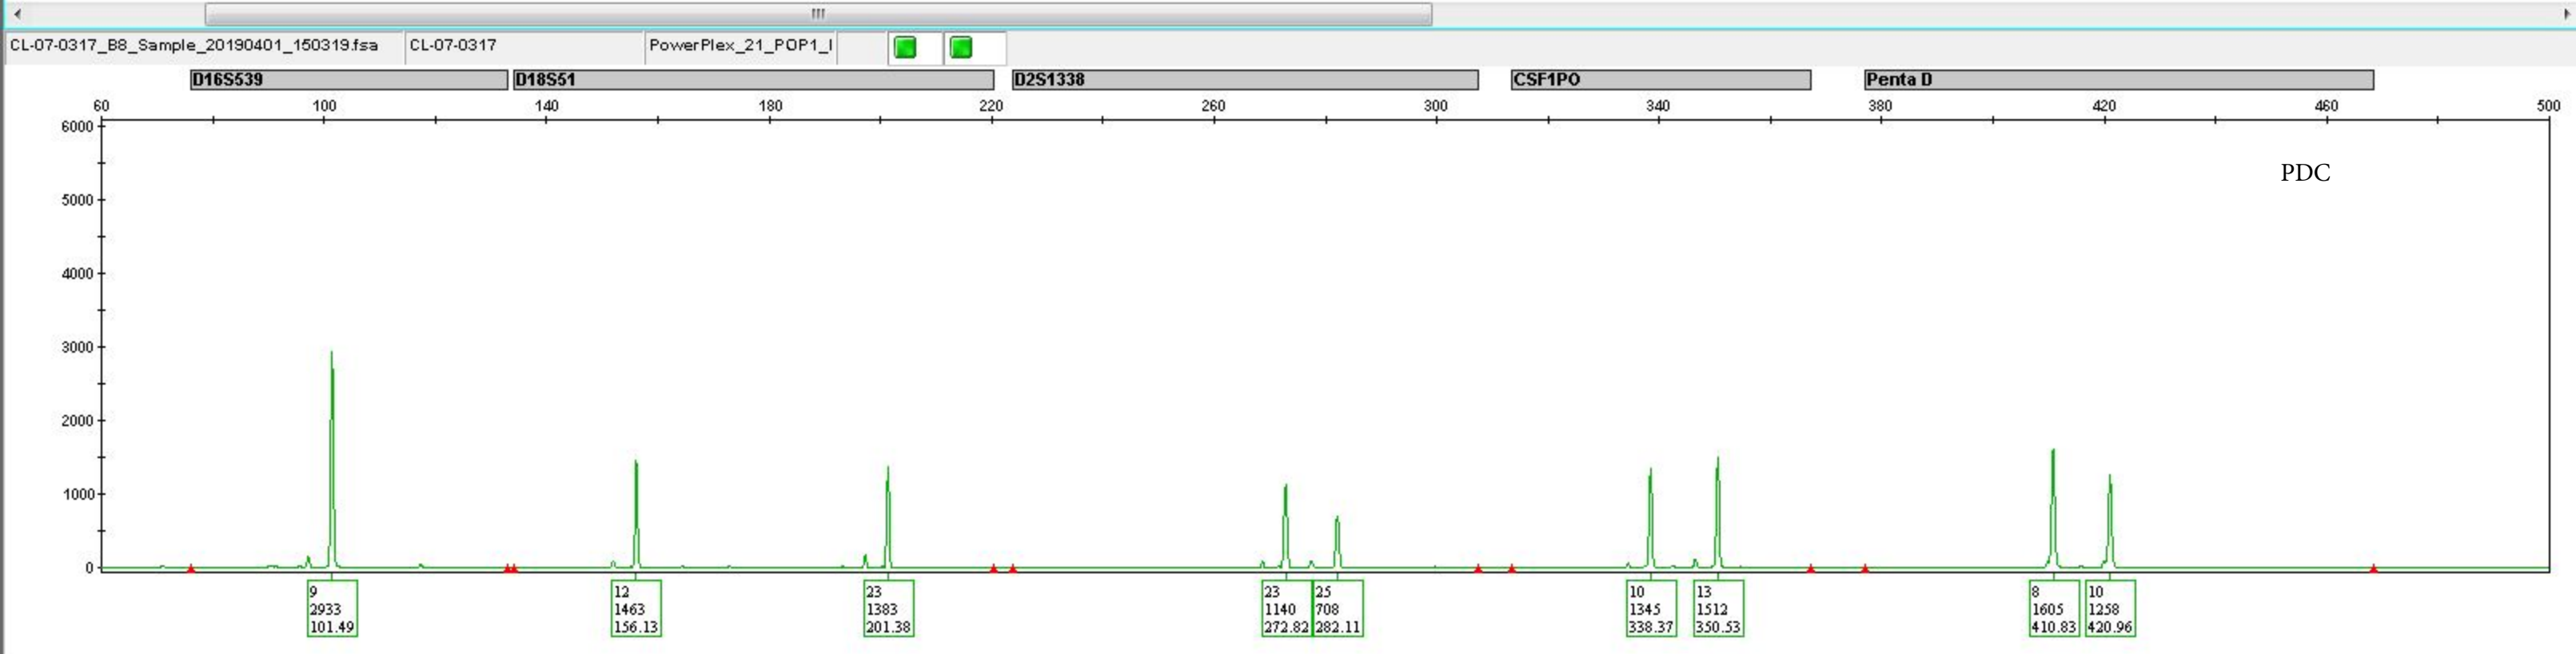

There are no controls in this selection

KD-17-404\_A8\_Sample\_20190401\_150318.fsa KD-17-404 PowerPlex\_21\_POP1\_I

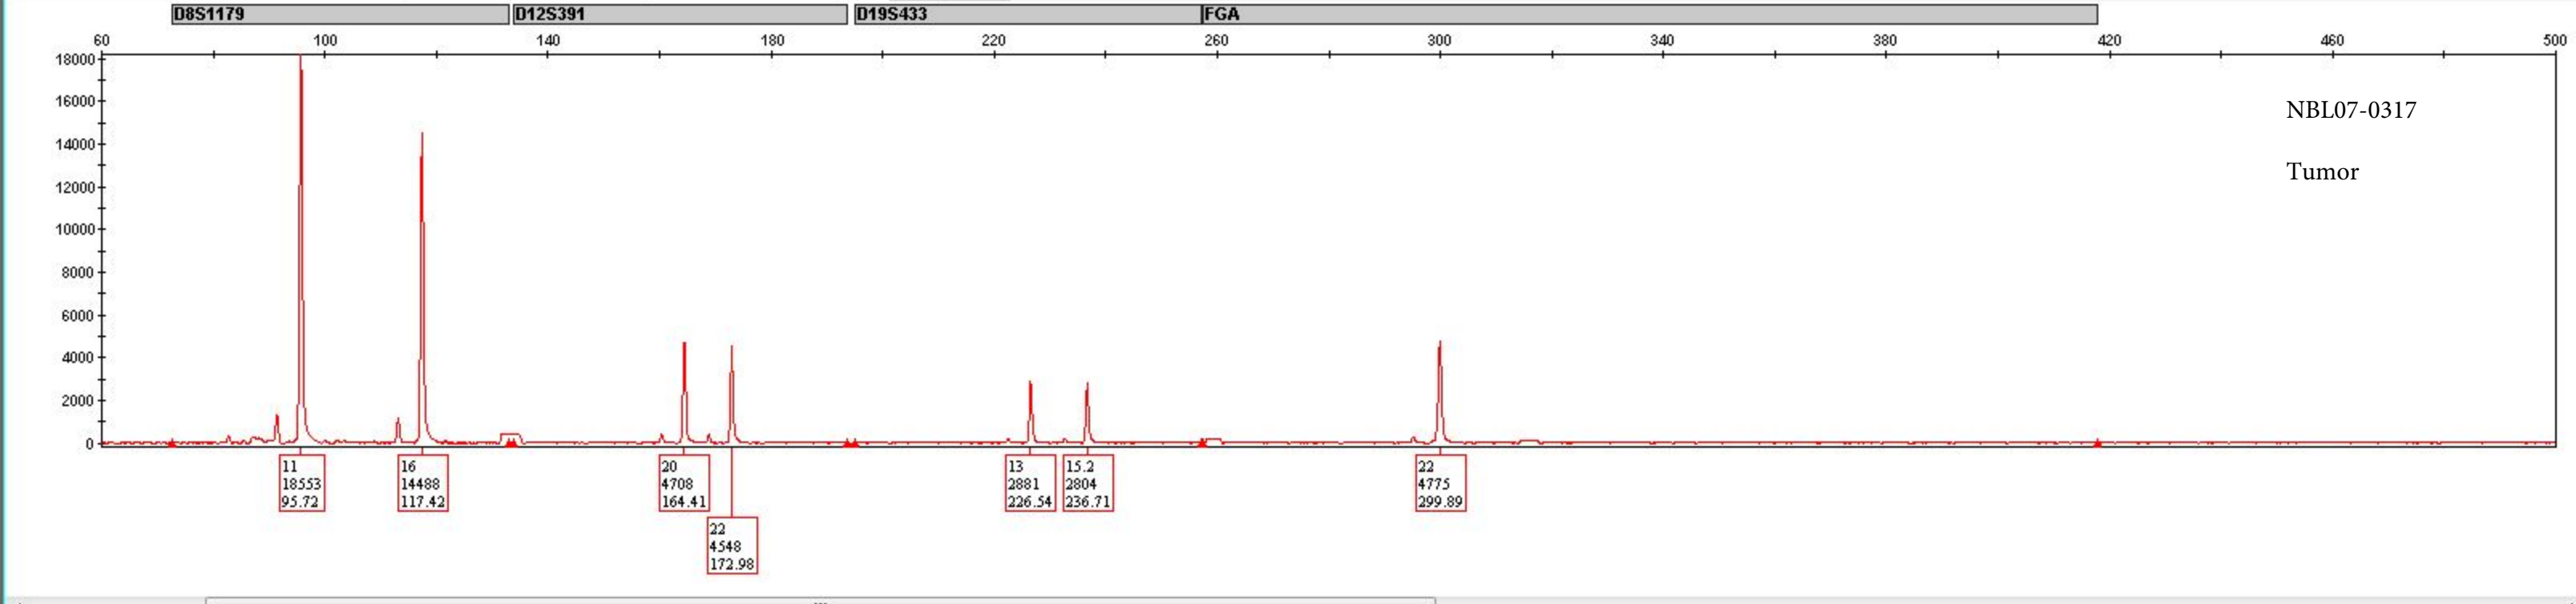

CL-07-0317\_B8\_Sample\_20190401\_150319.fsa CL-07-0317 PowerPlex\_21\_POP1\_I

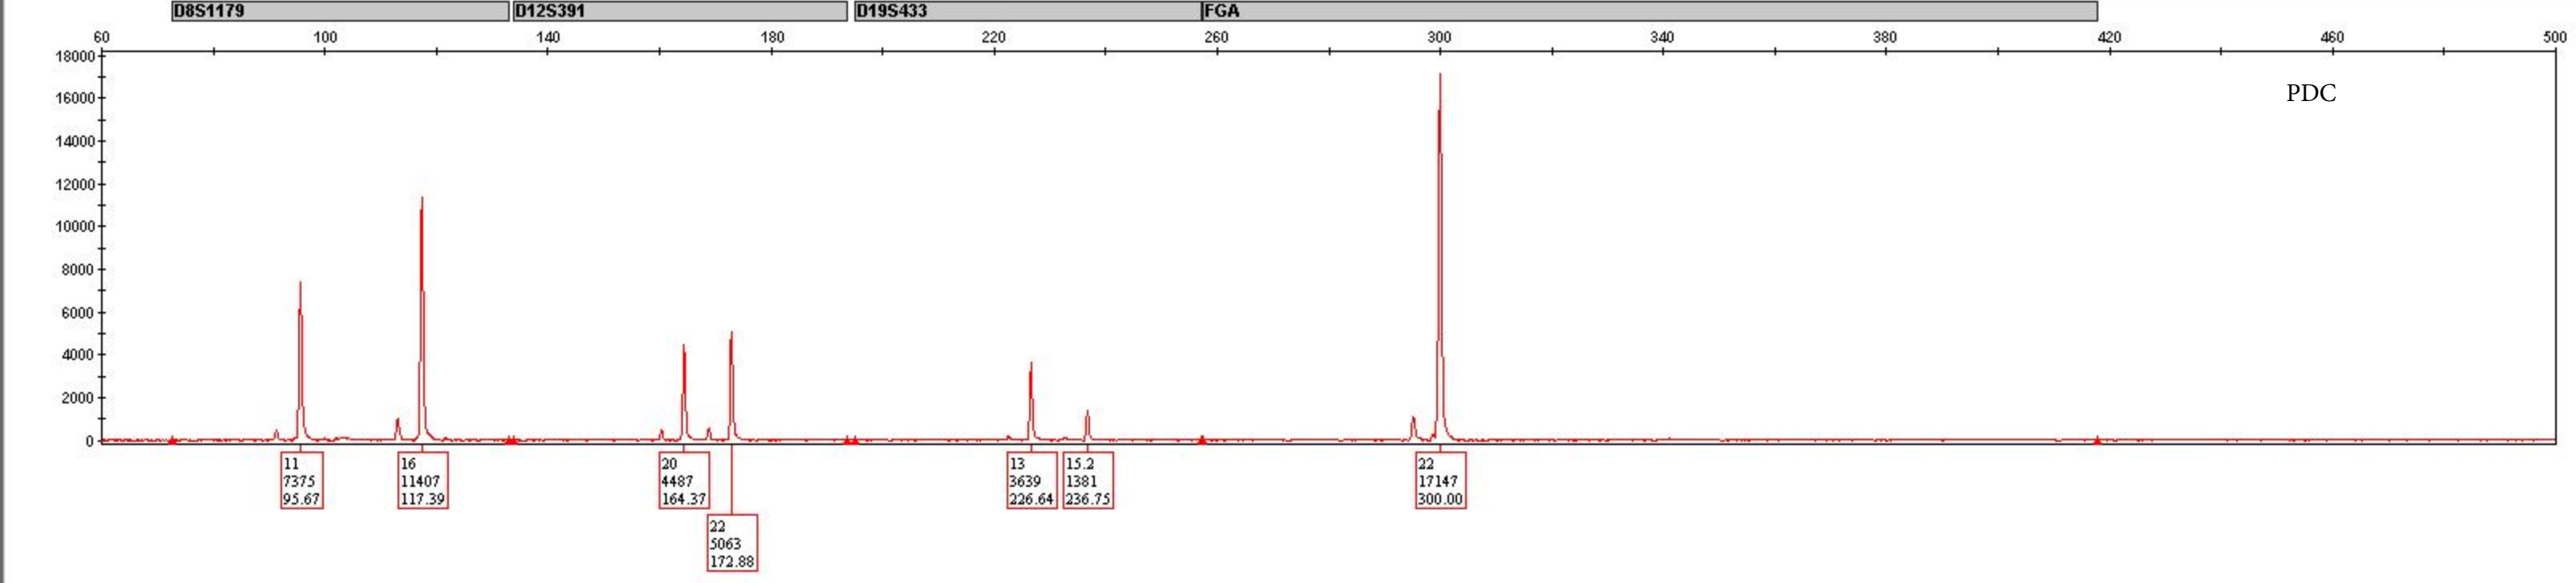

There are no controls in this selection

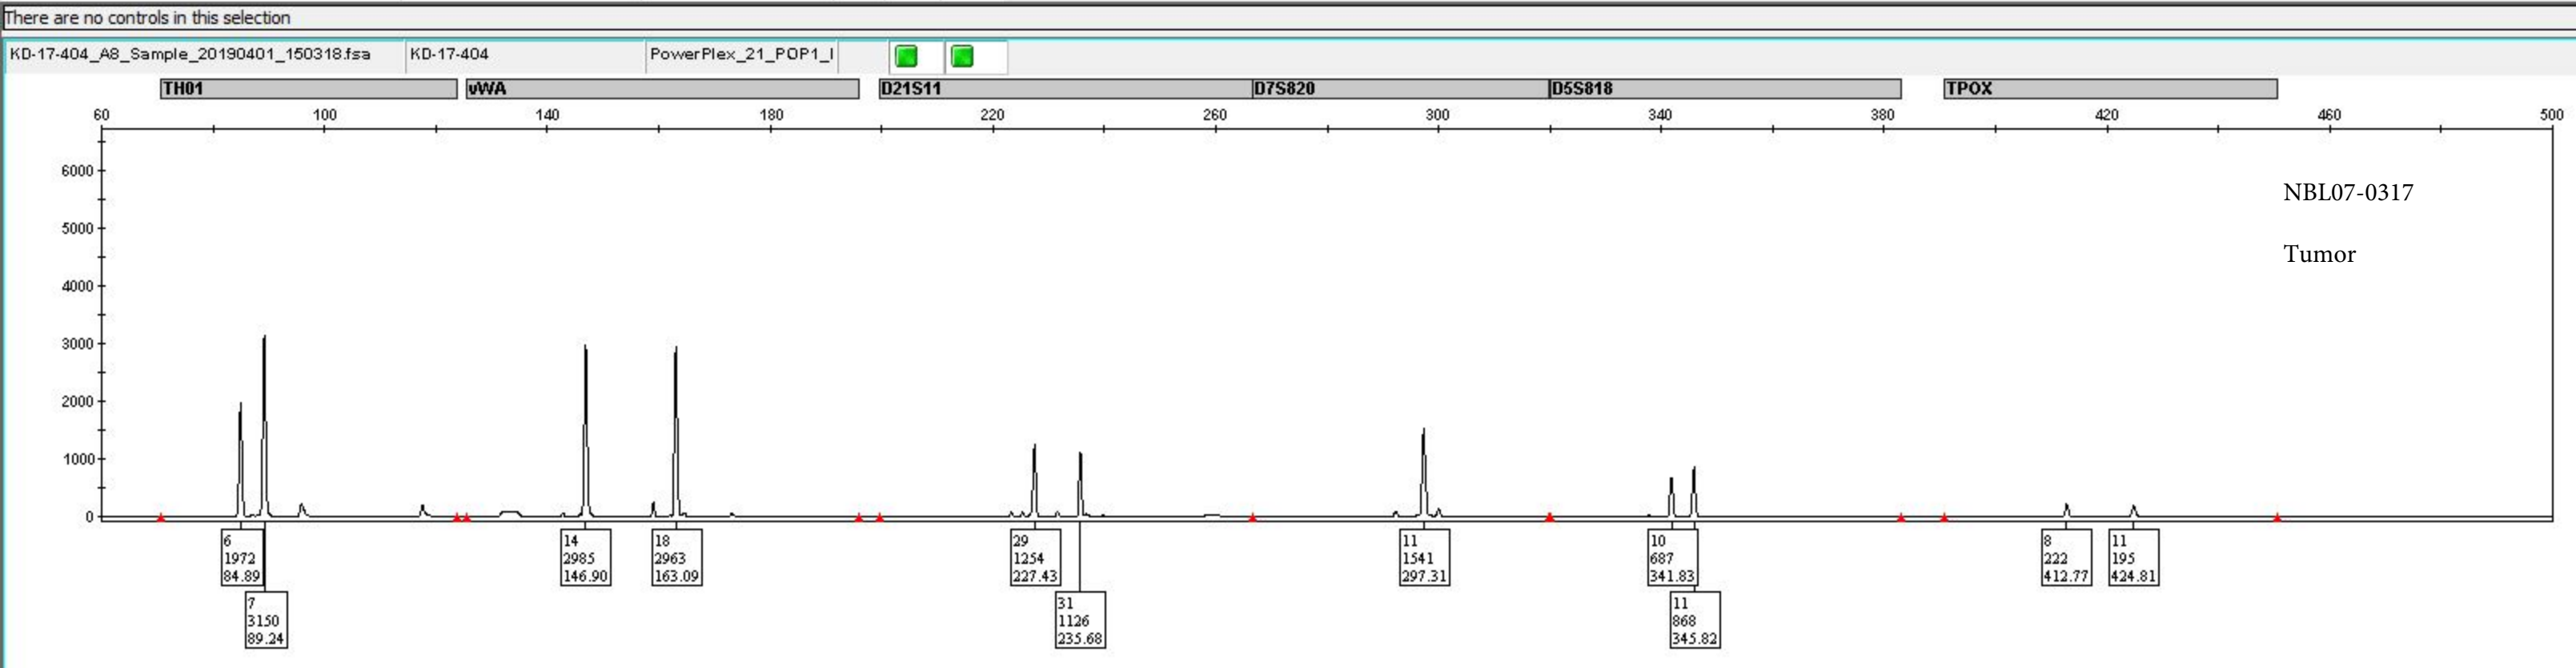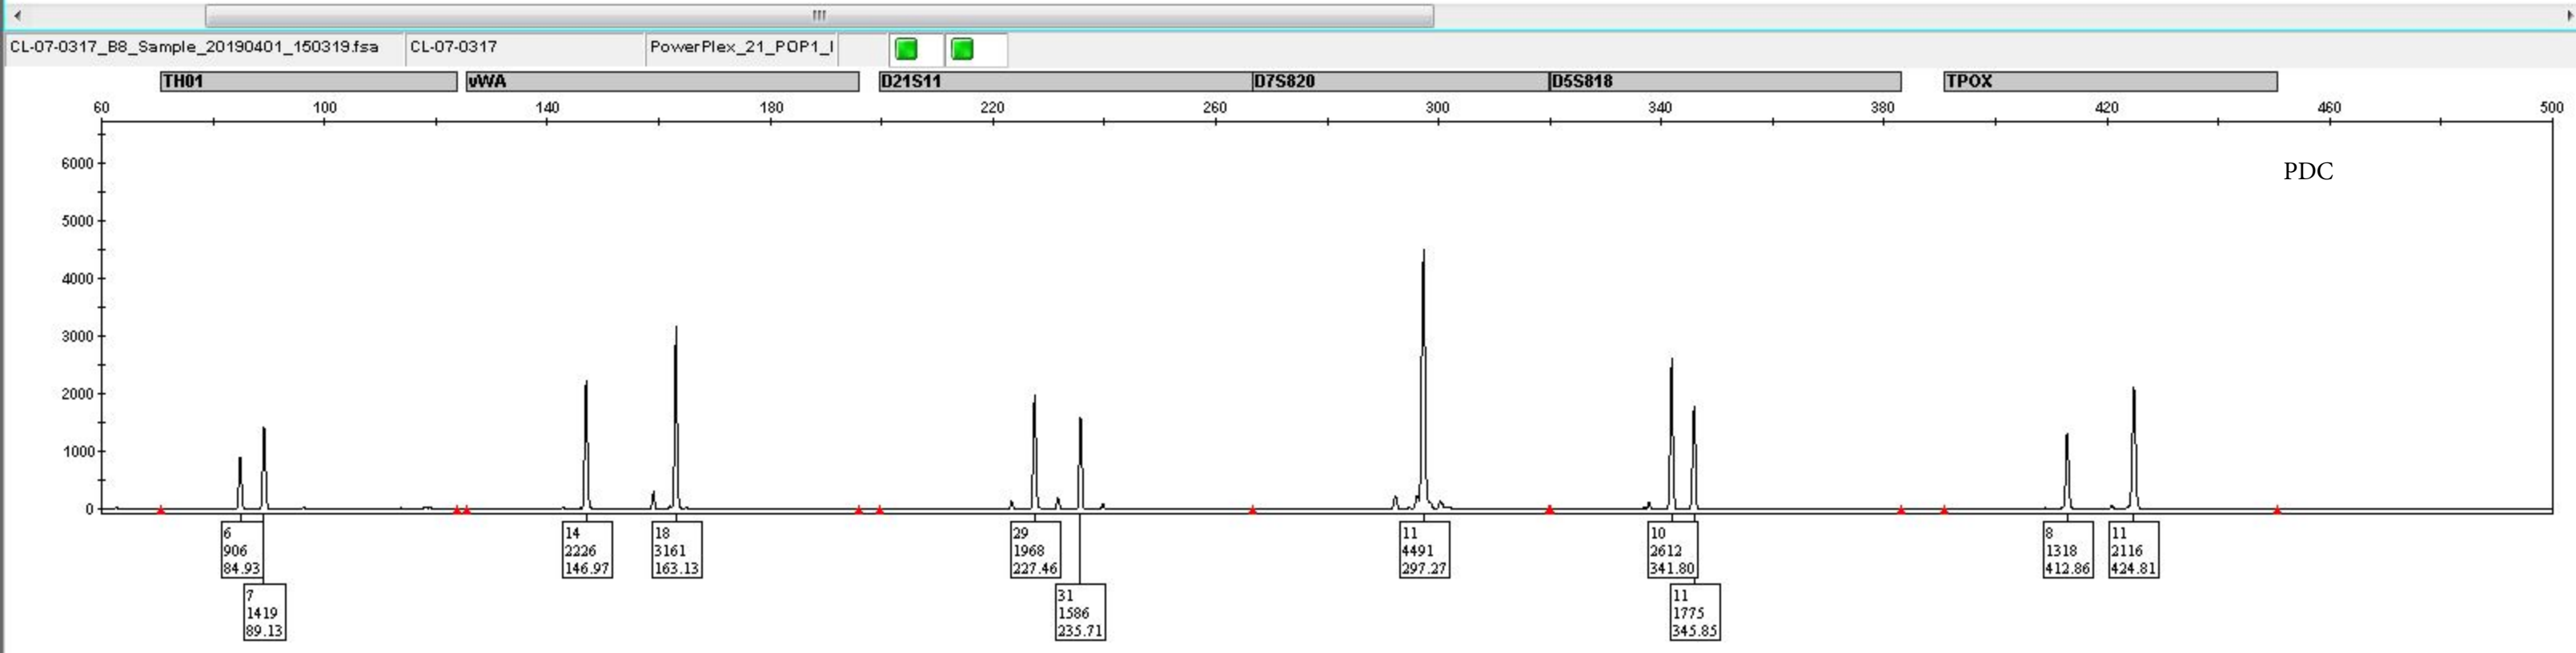

There are no controls in this selection

KD-18-85\_C8\_Sample\_20190401\_150320.fsa KD-18-85 PowerPlex\_21\_POP1\_I

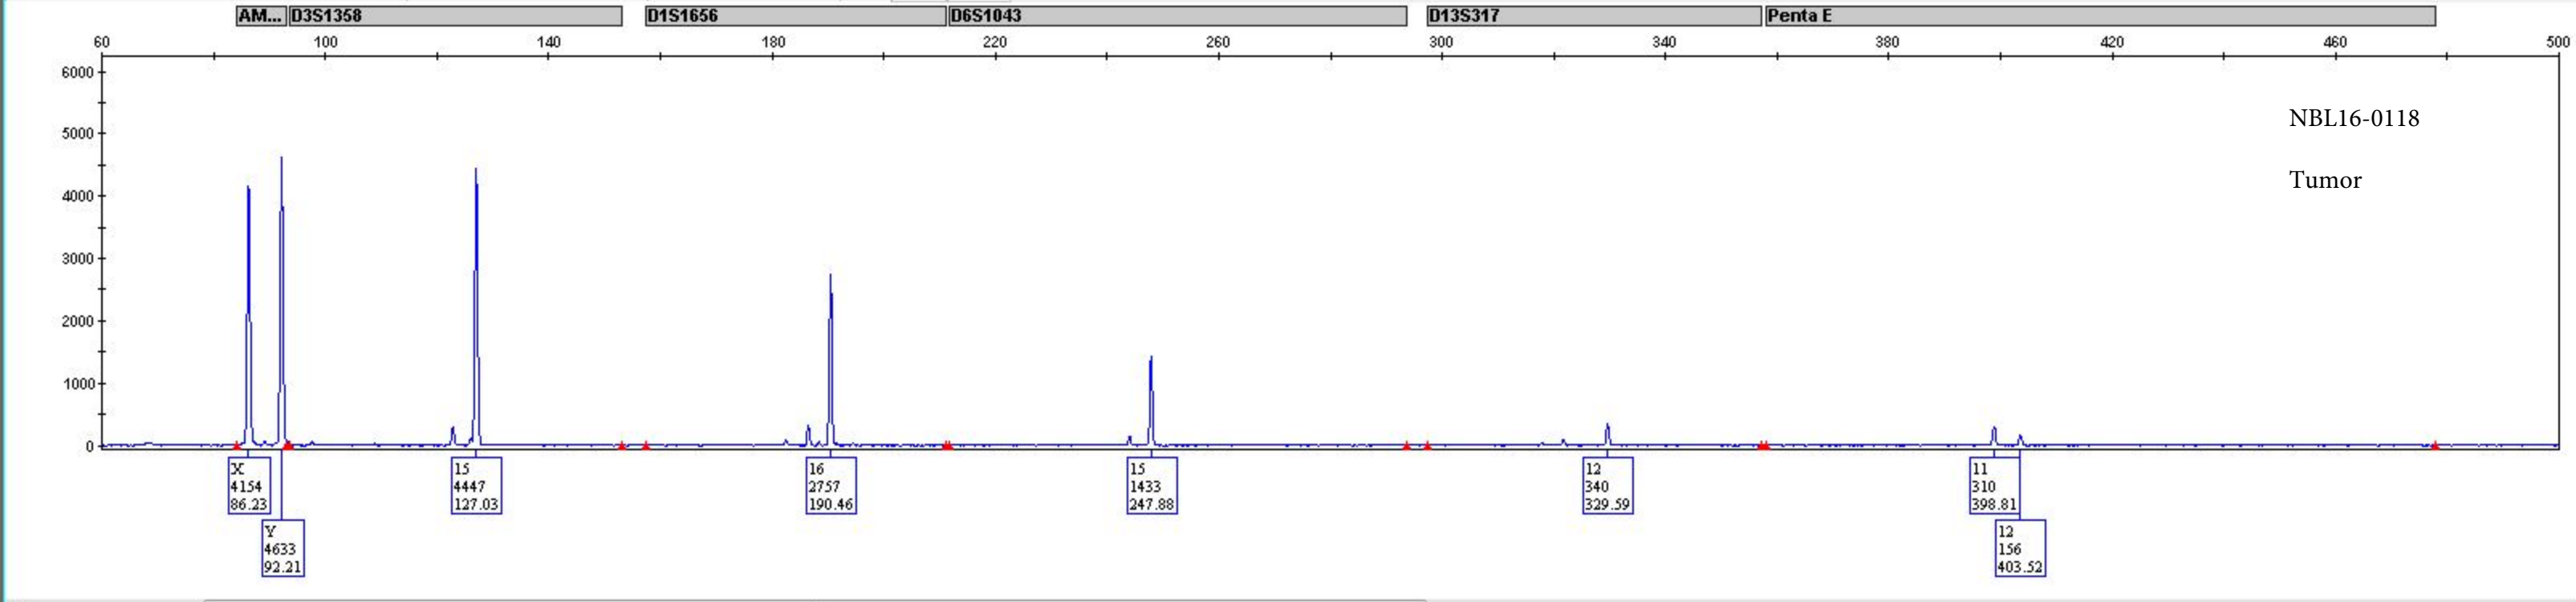

CL-16-0118\_D8\_Sample\_20190401\_150321.fsa CL-16-0118 PowerPlex\_21\_POP1\_I

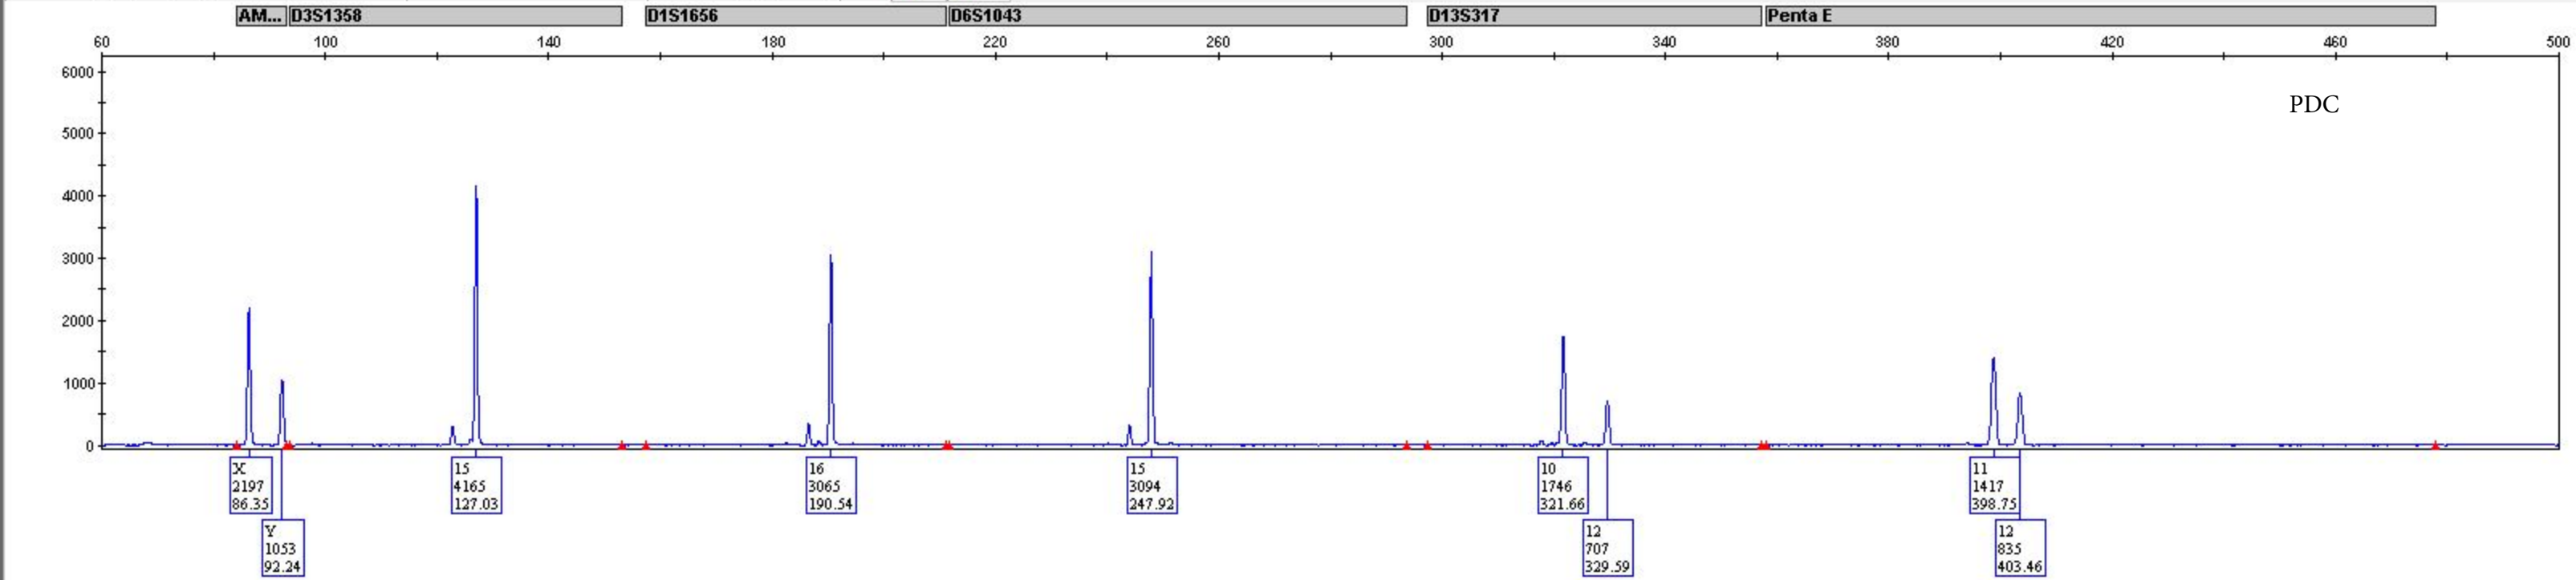

There are no controls in this selection

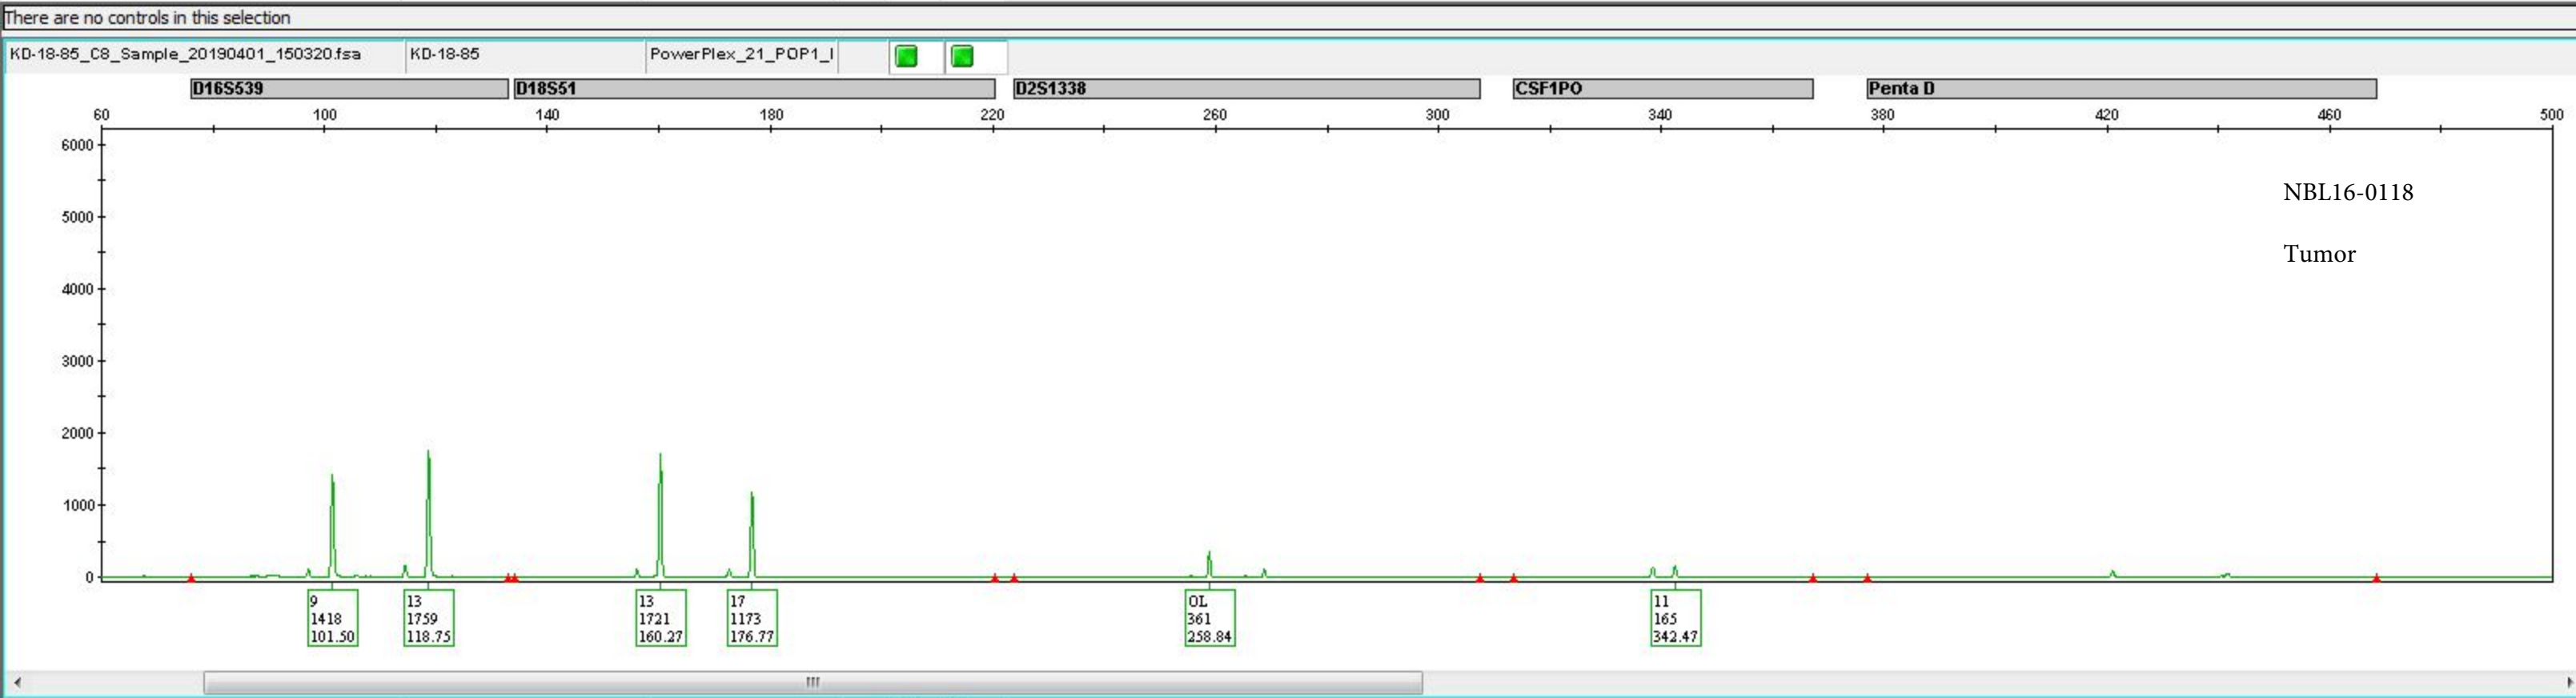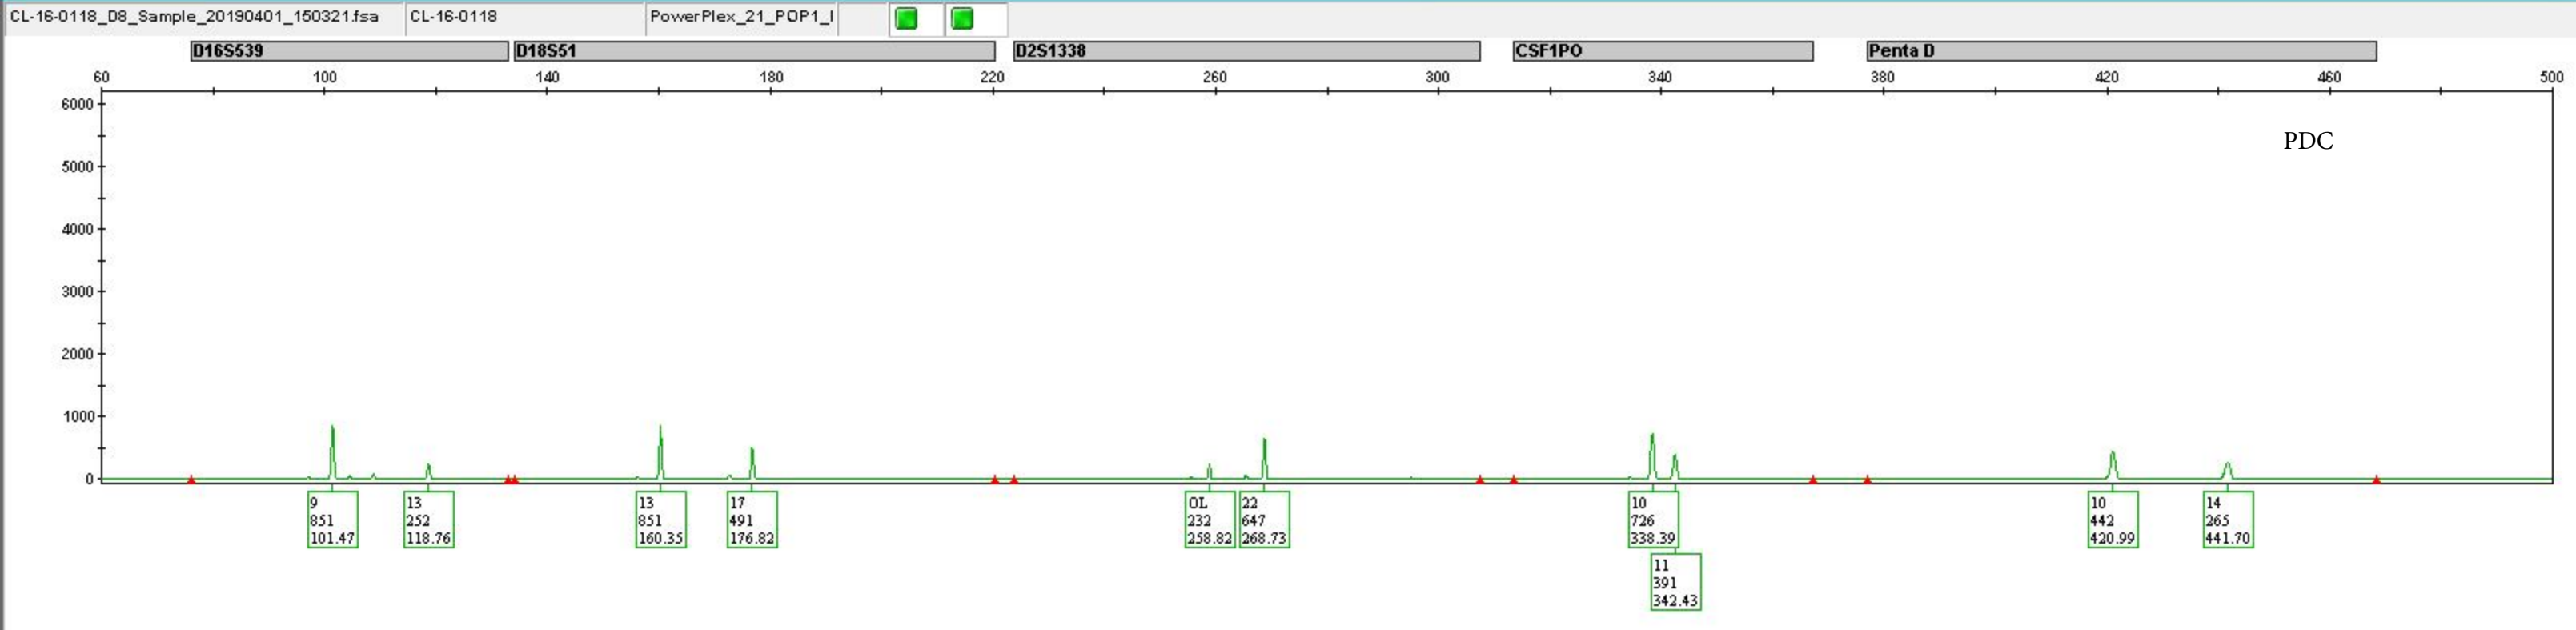

There are no controls in this selection

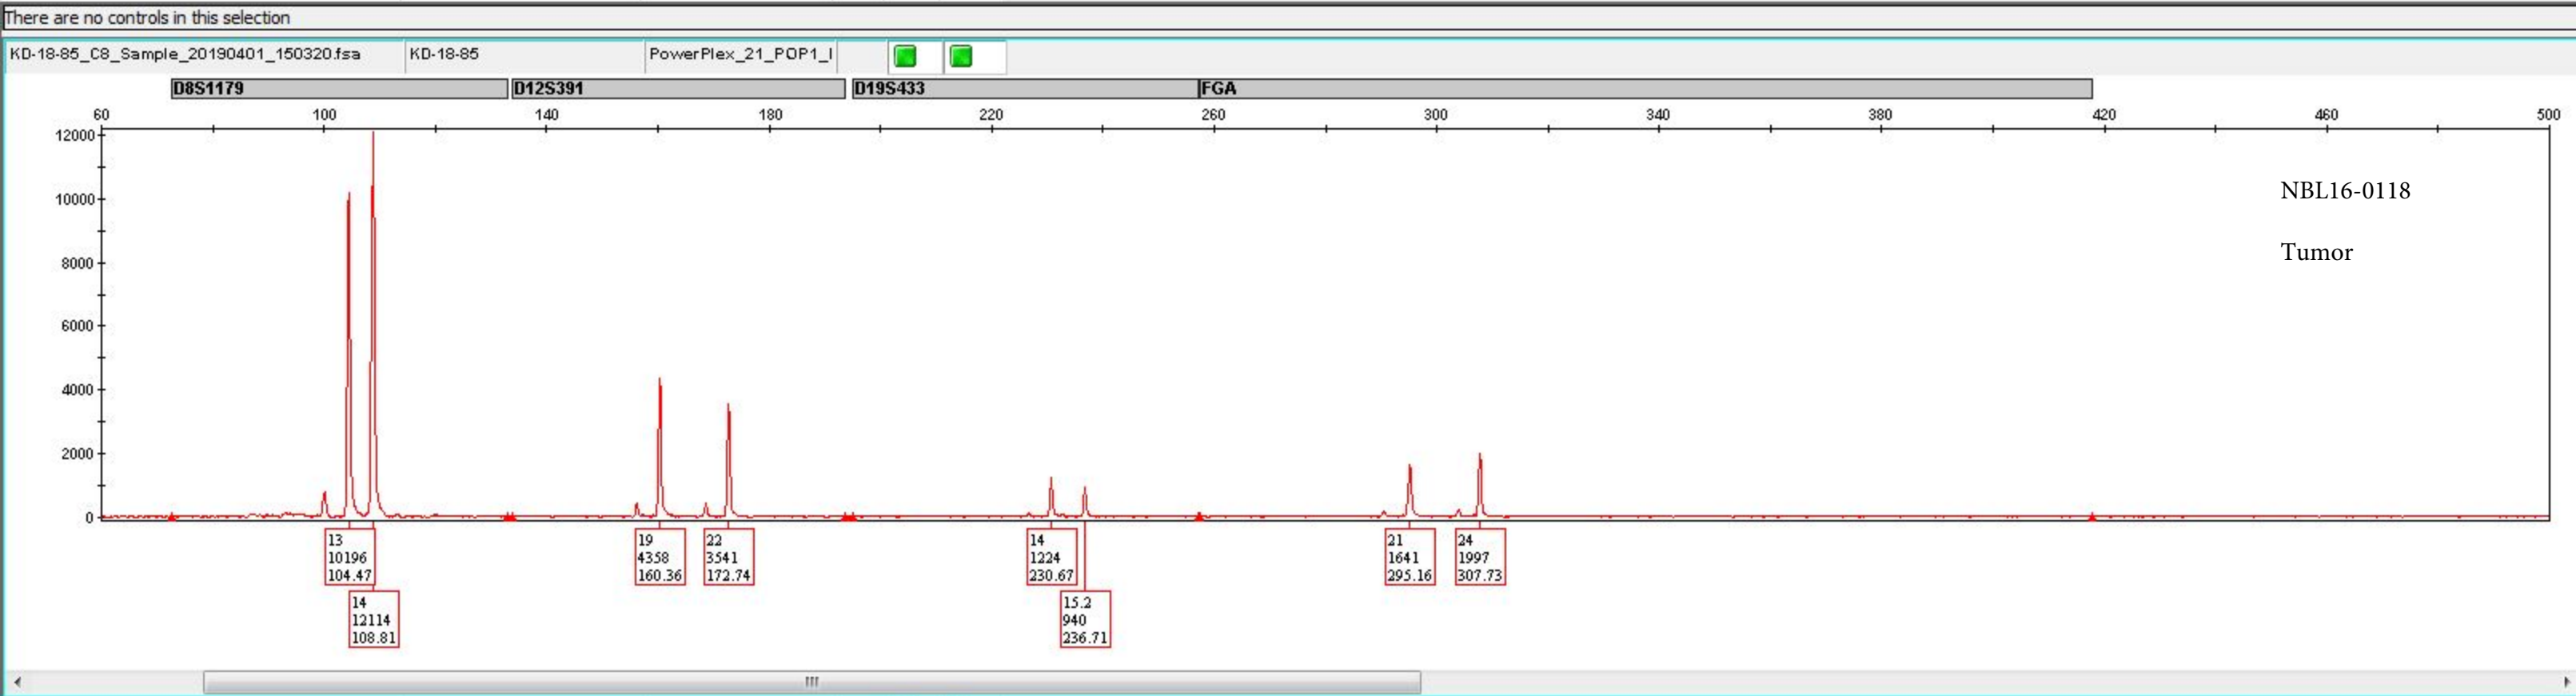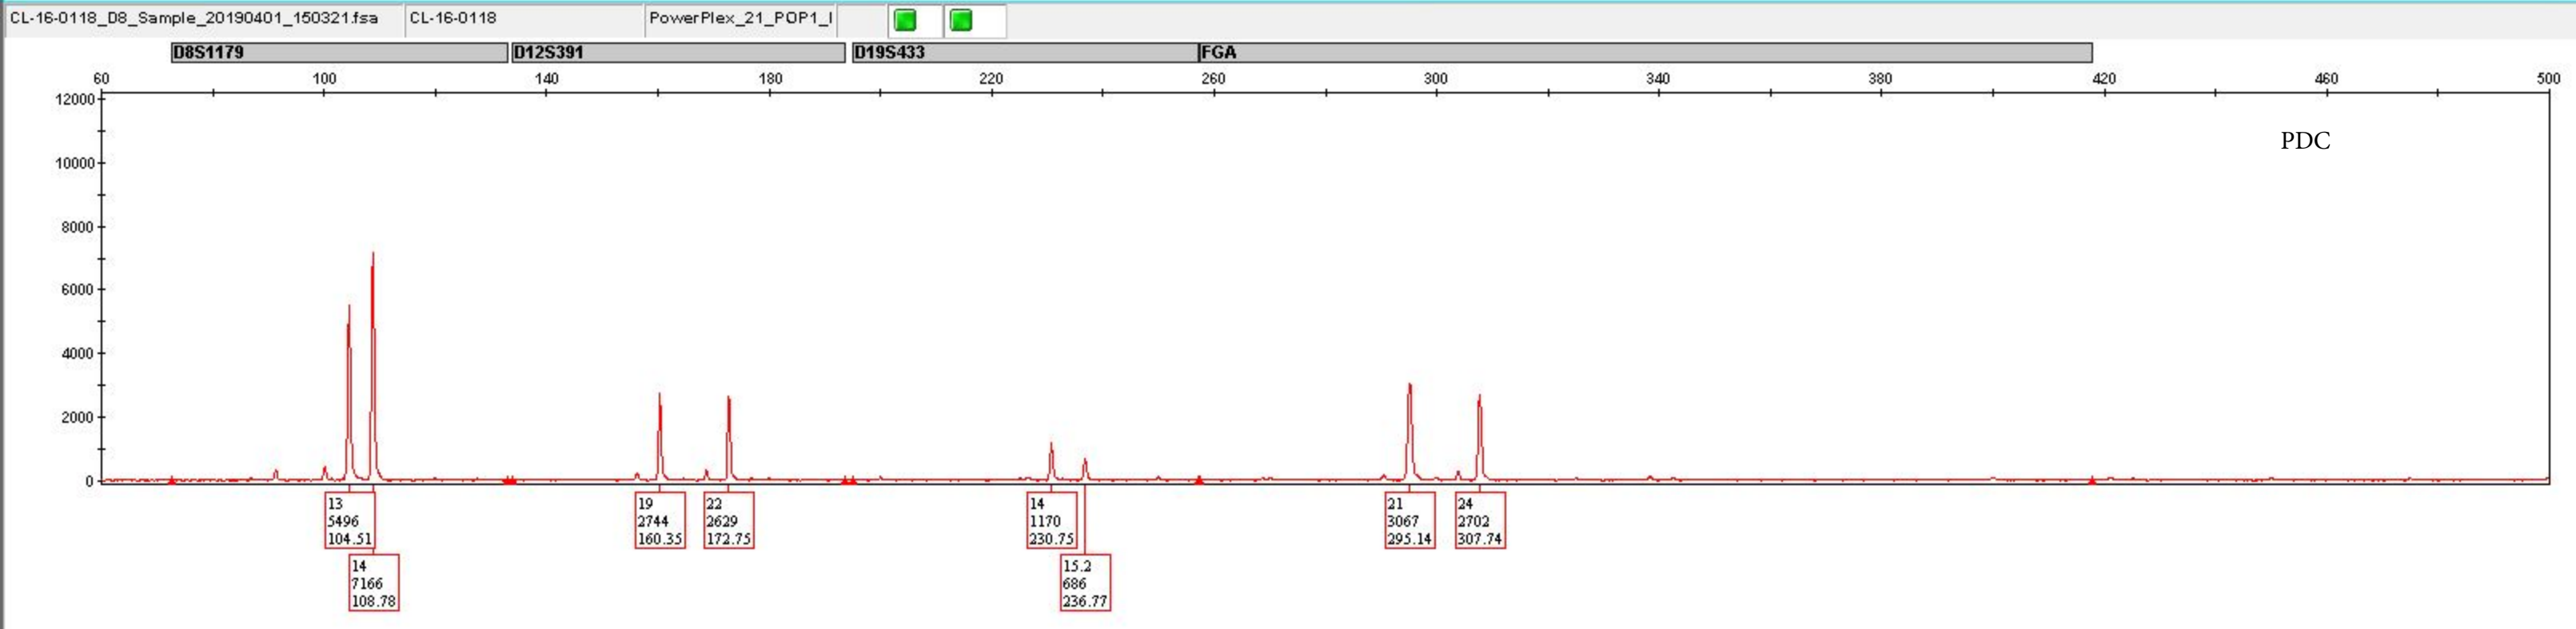

There are no controls in this selection

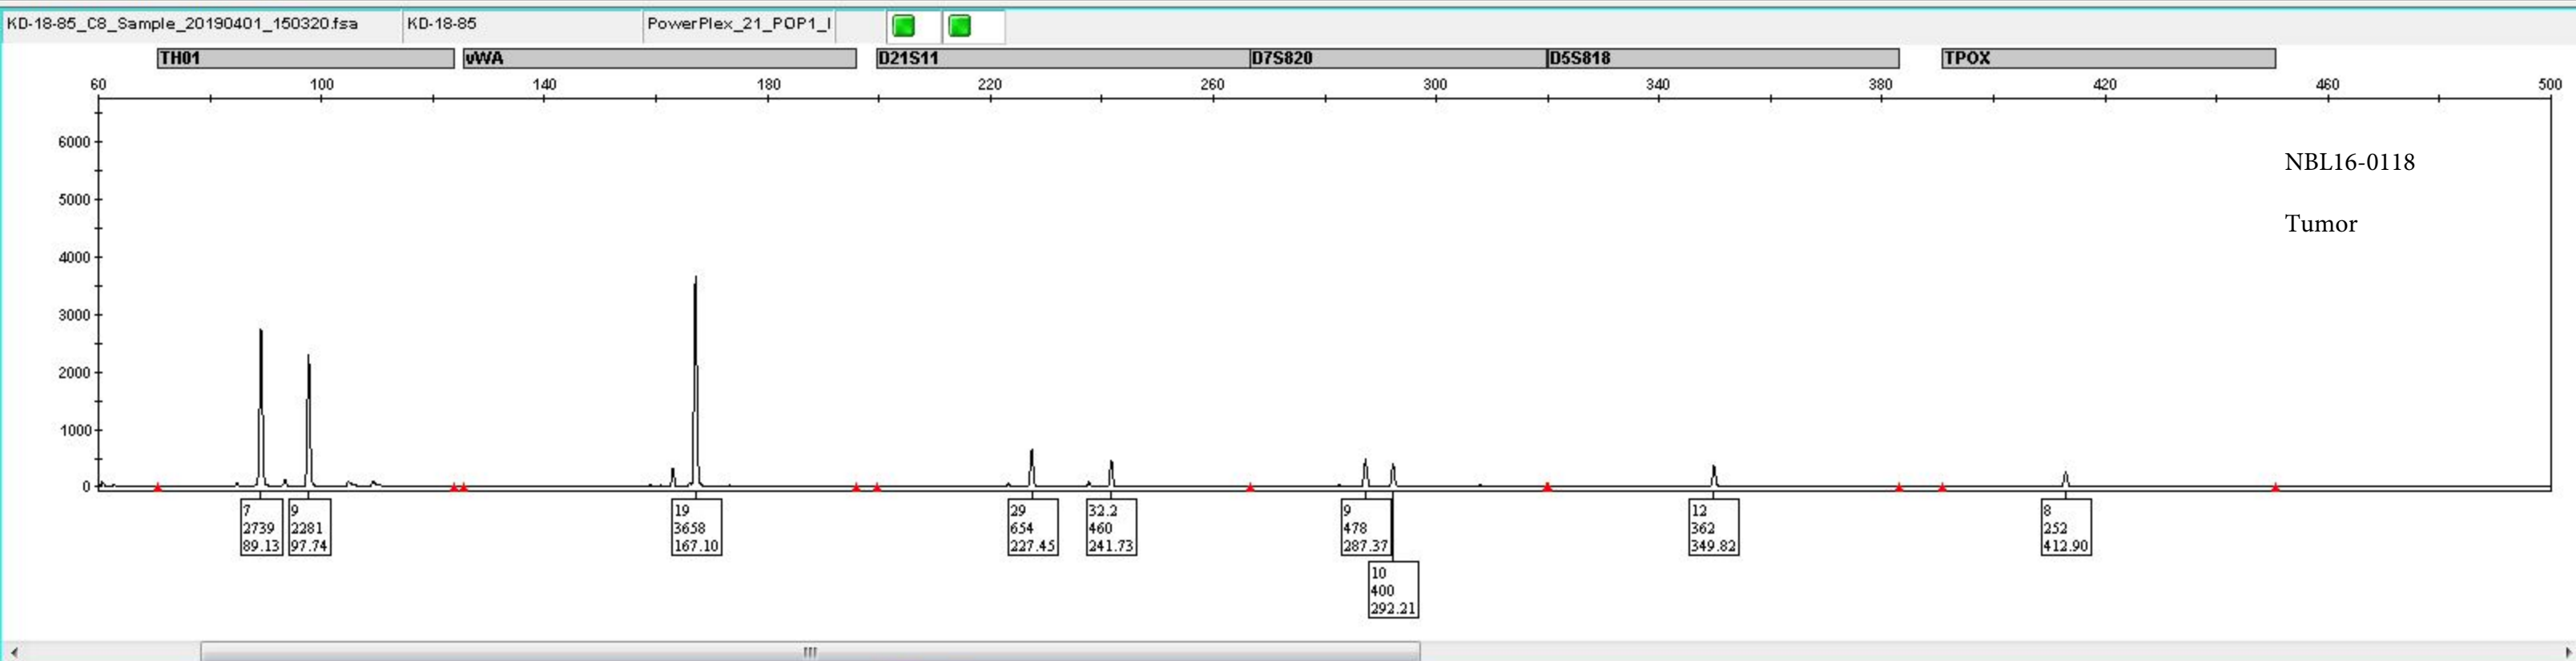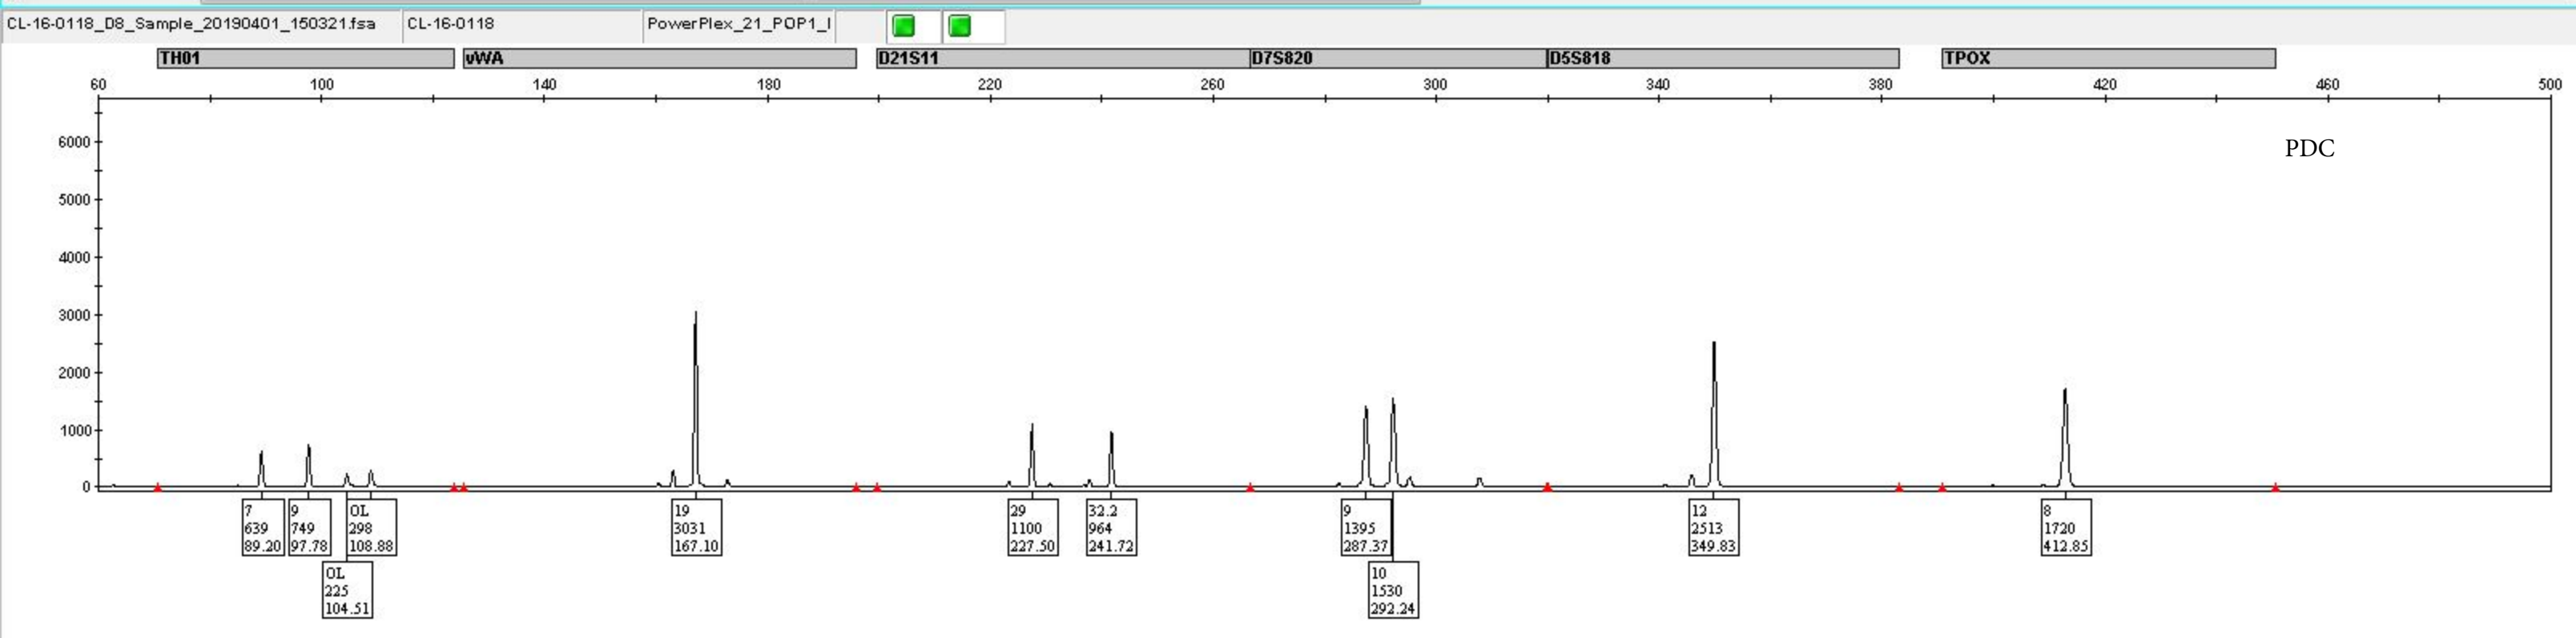



There are no controls in this selection

KD-18-126\_E8\_Sample\_20190401\_154618.fsa KD-18-126 PowerPlex\_21\_POP1\_I

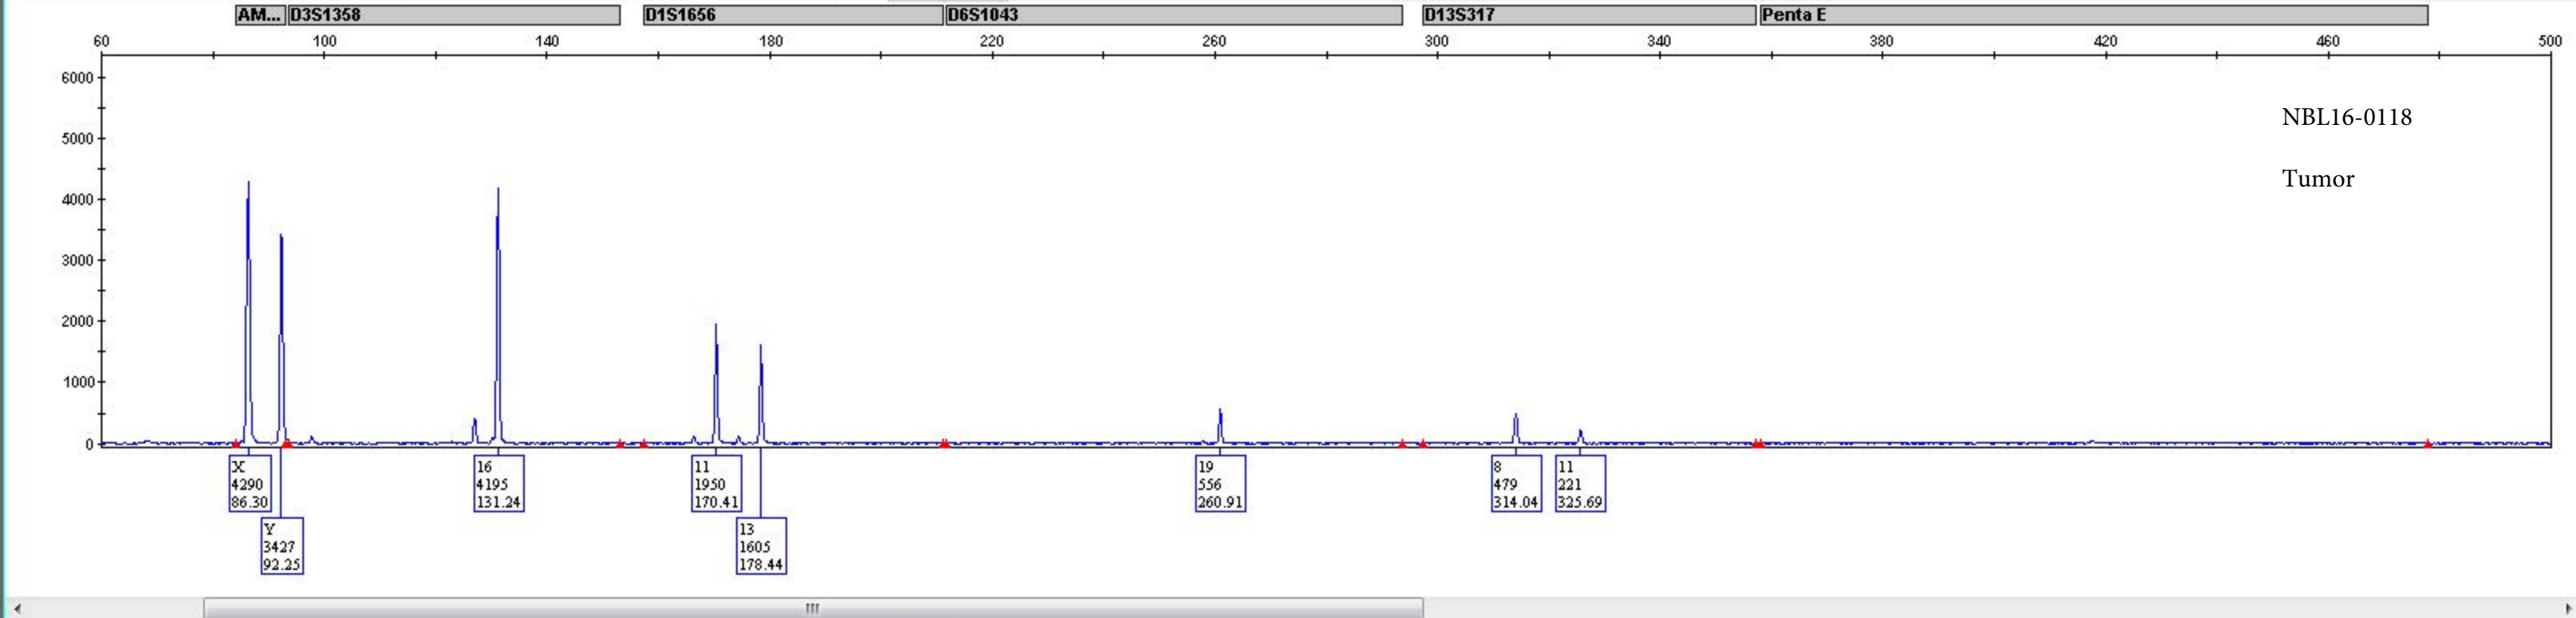

CL-23-0118\_F8\_Sample\_20190401\_154619.fsa CL-23-0118 PowerPlex\_21\_POP1\_I

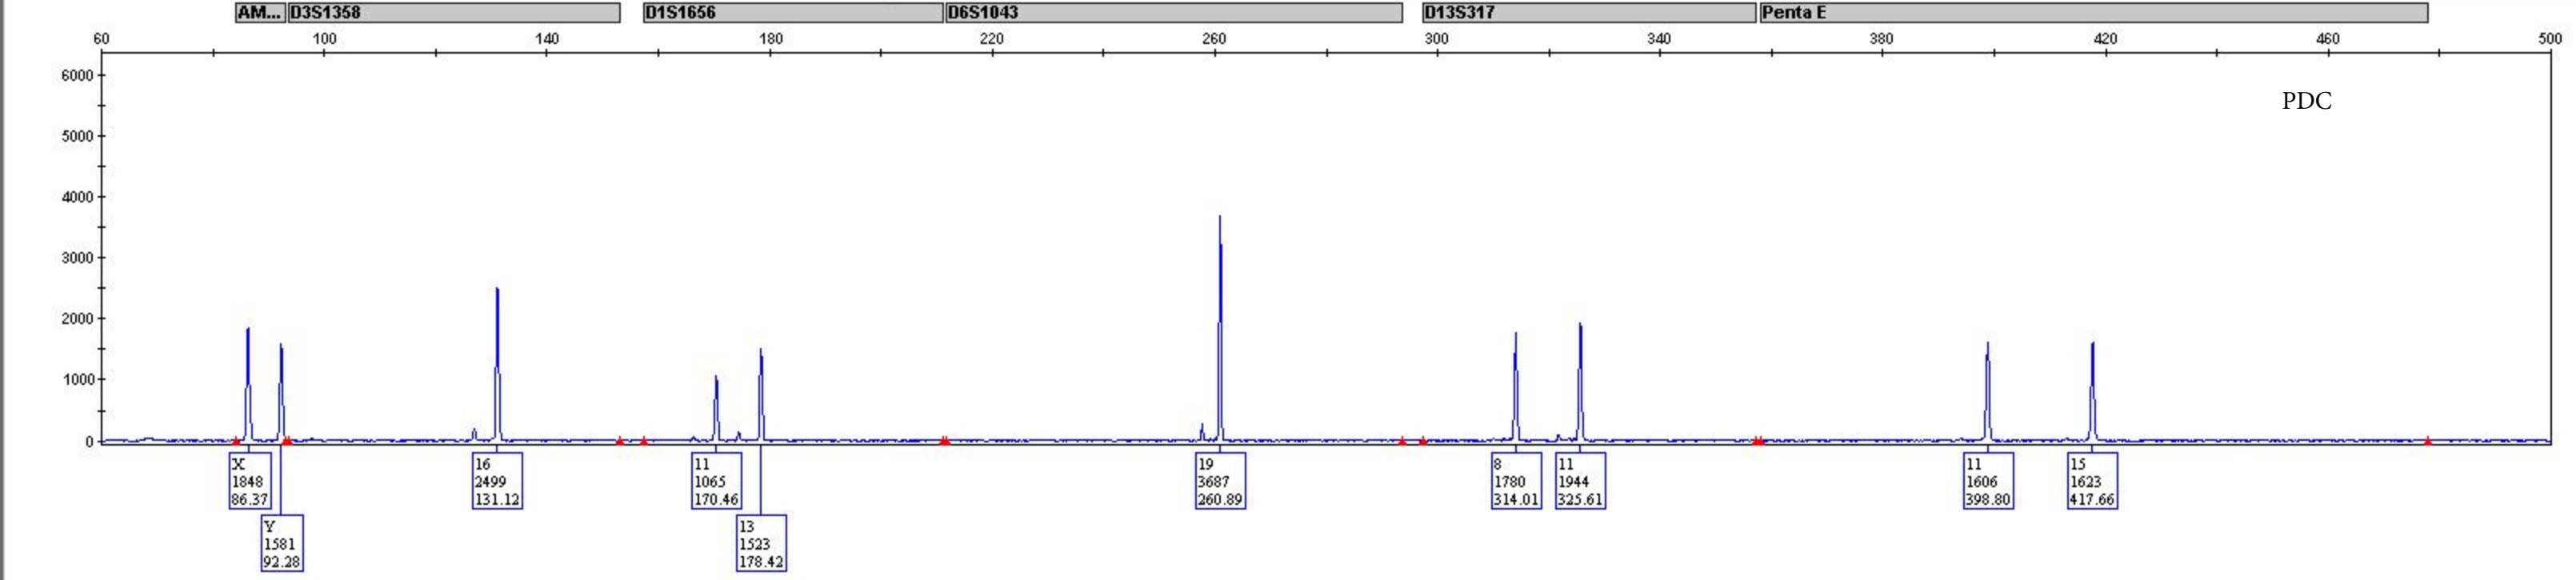

There are no controls in this selection

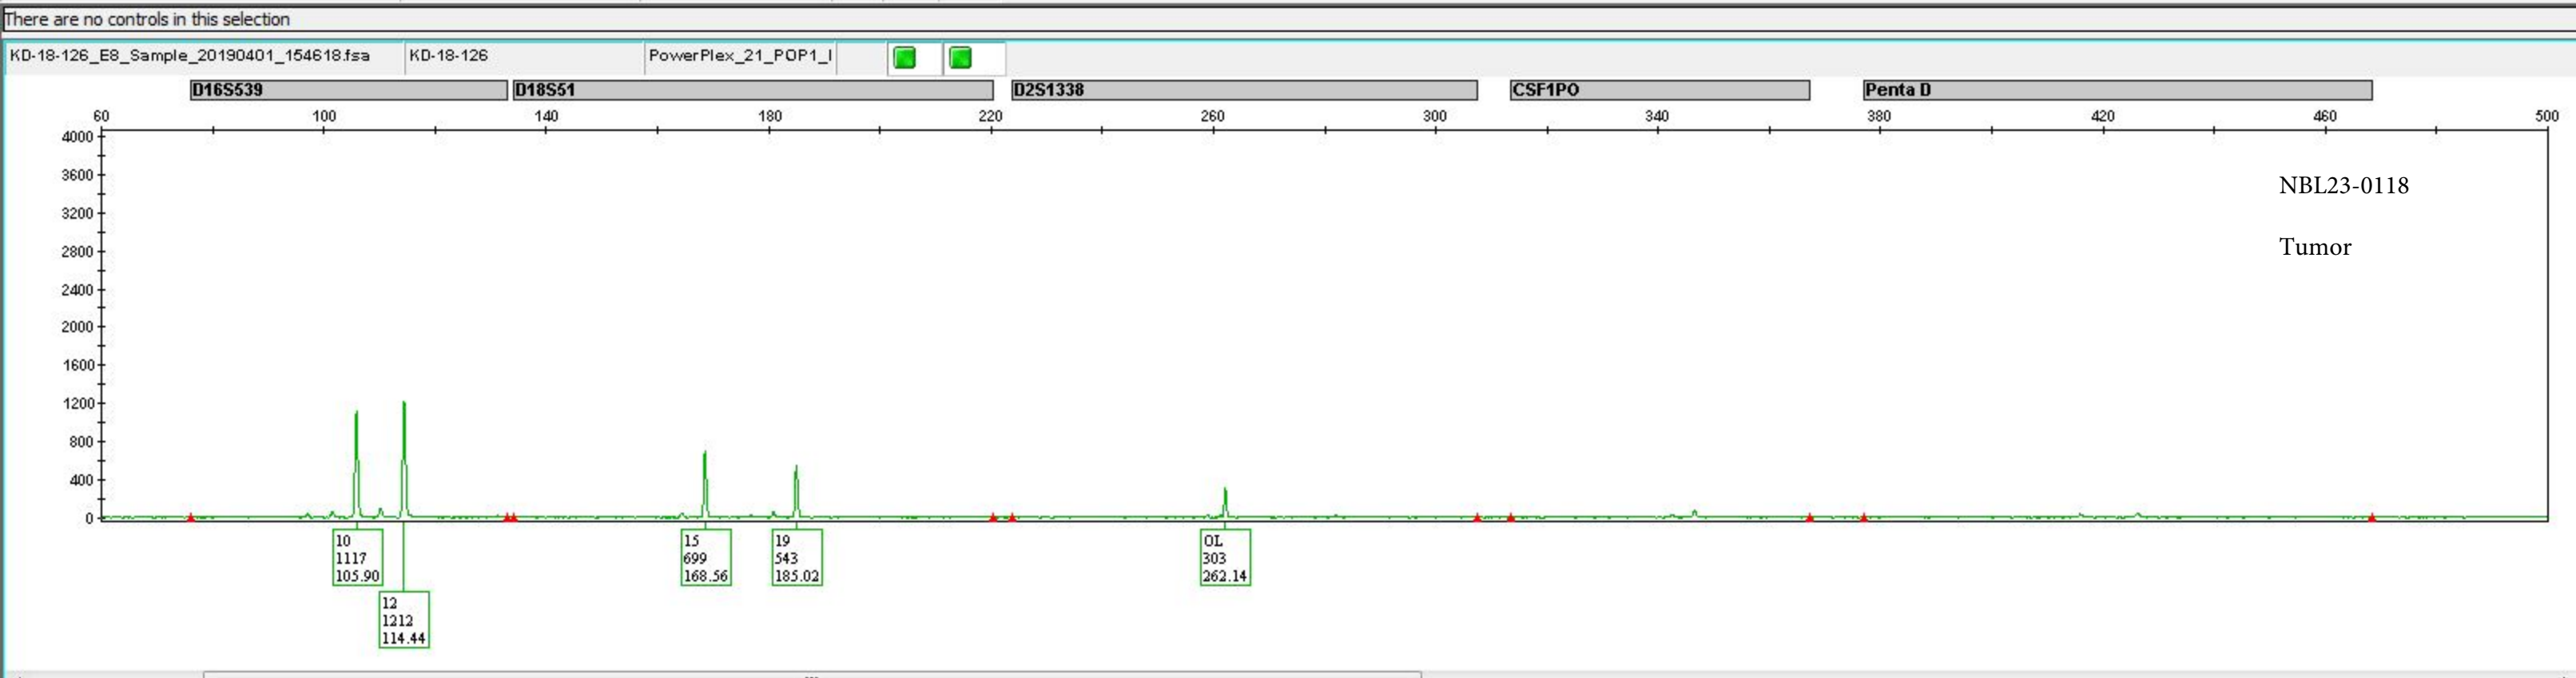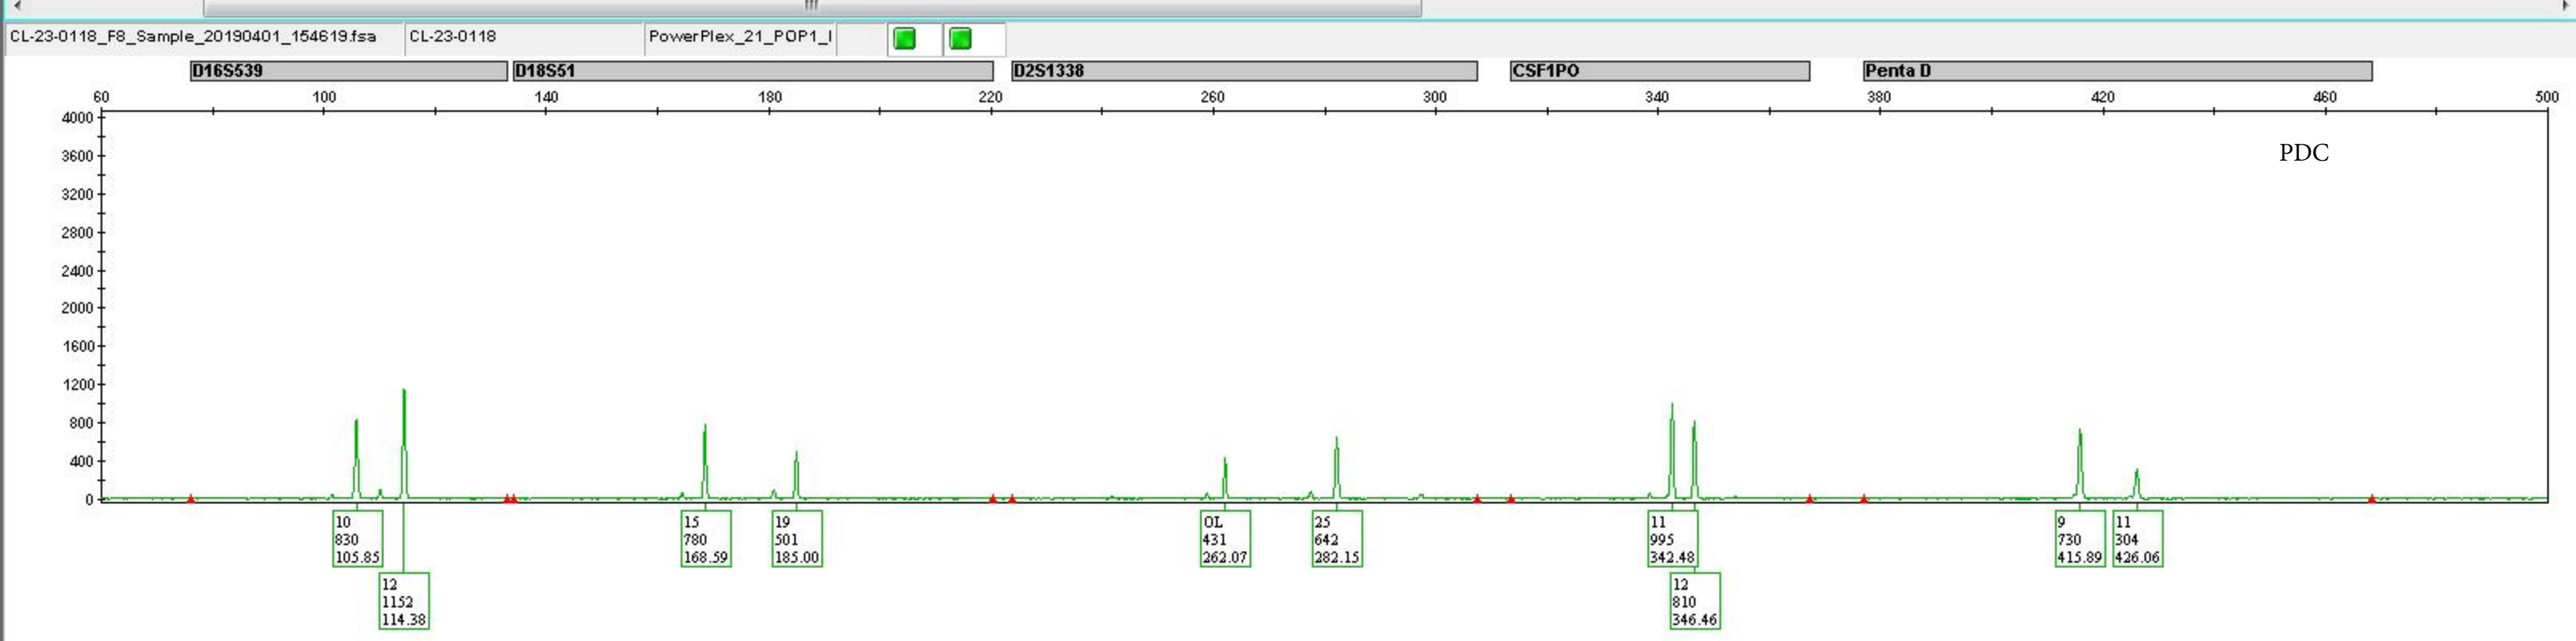

There are no controls in this selection

KD-18-126\_E8\_Sample\_20190401\_154618.fsa KD-18-126 PowerPlex\_21\_POP1\_I

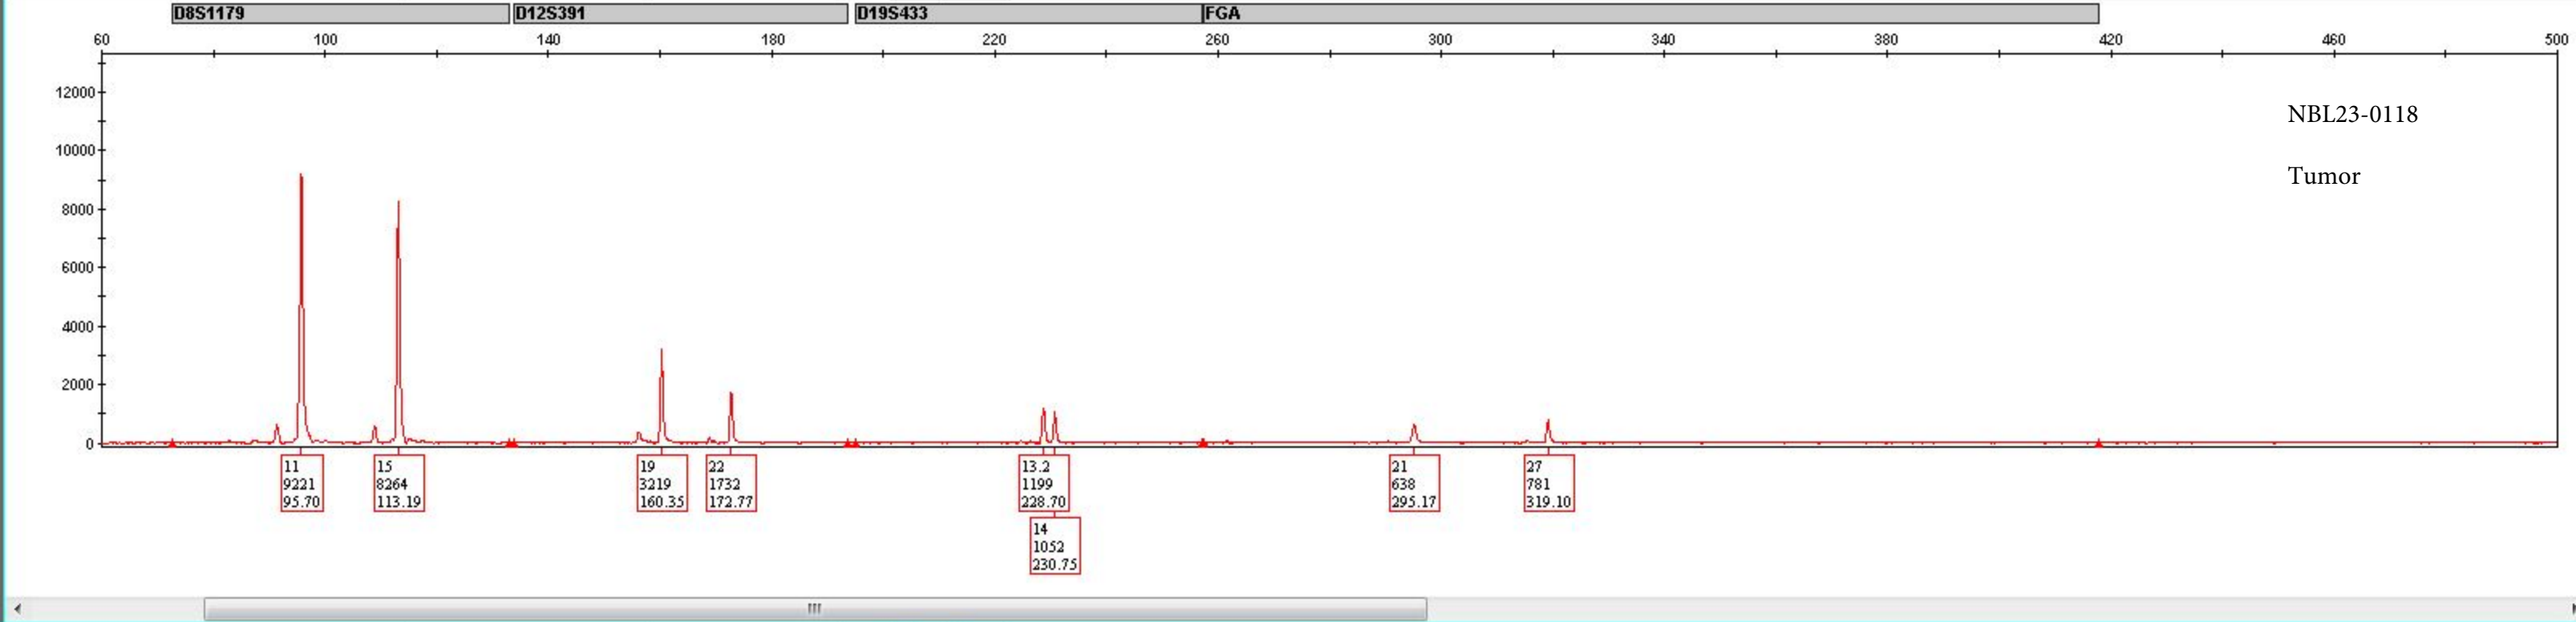

CL-23-0118\_F8\_Sample\_20190401\_154619.fsa CL-23-0118 PowerPlex\_21\_POP1\_I

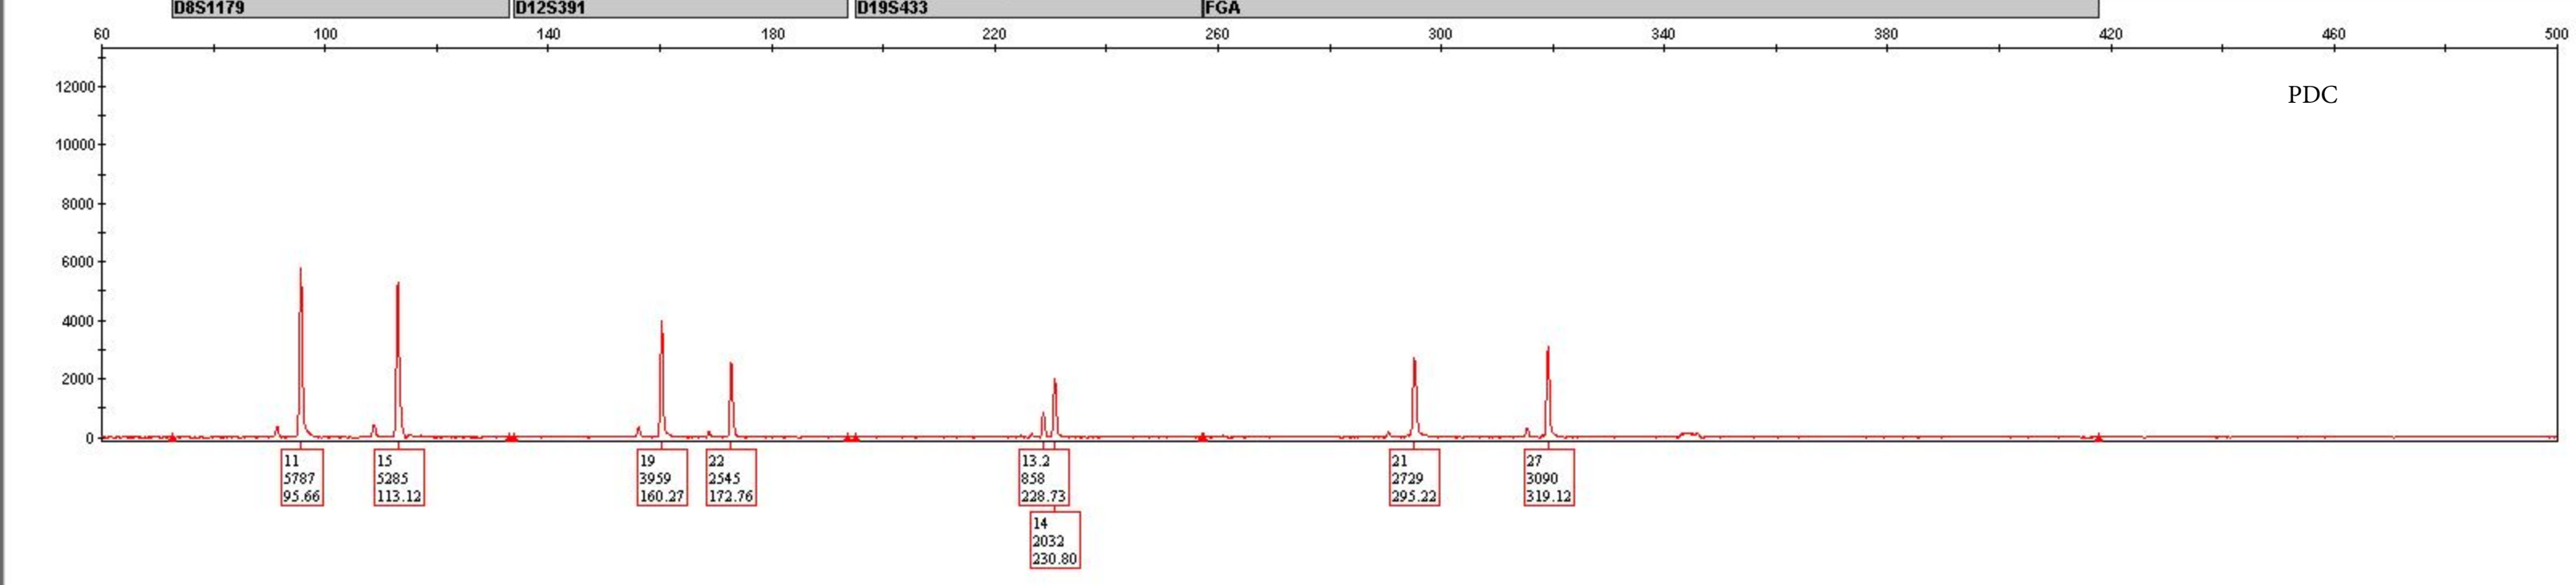

There are no controls in this selection

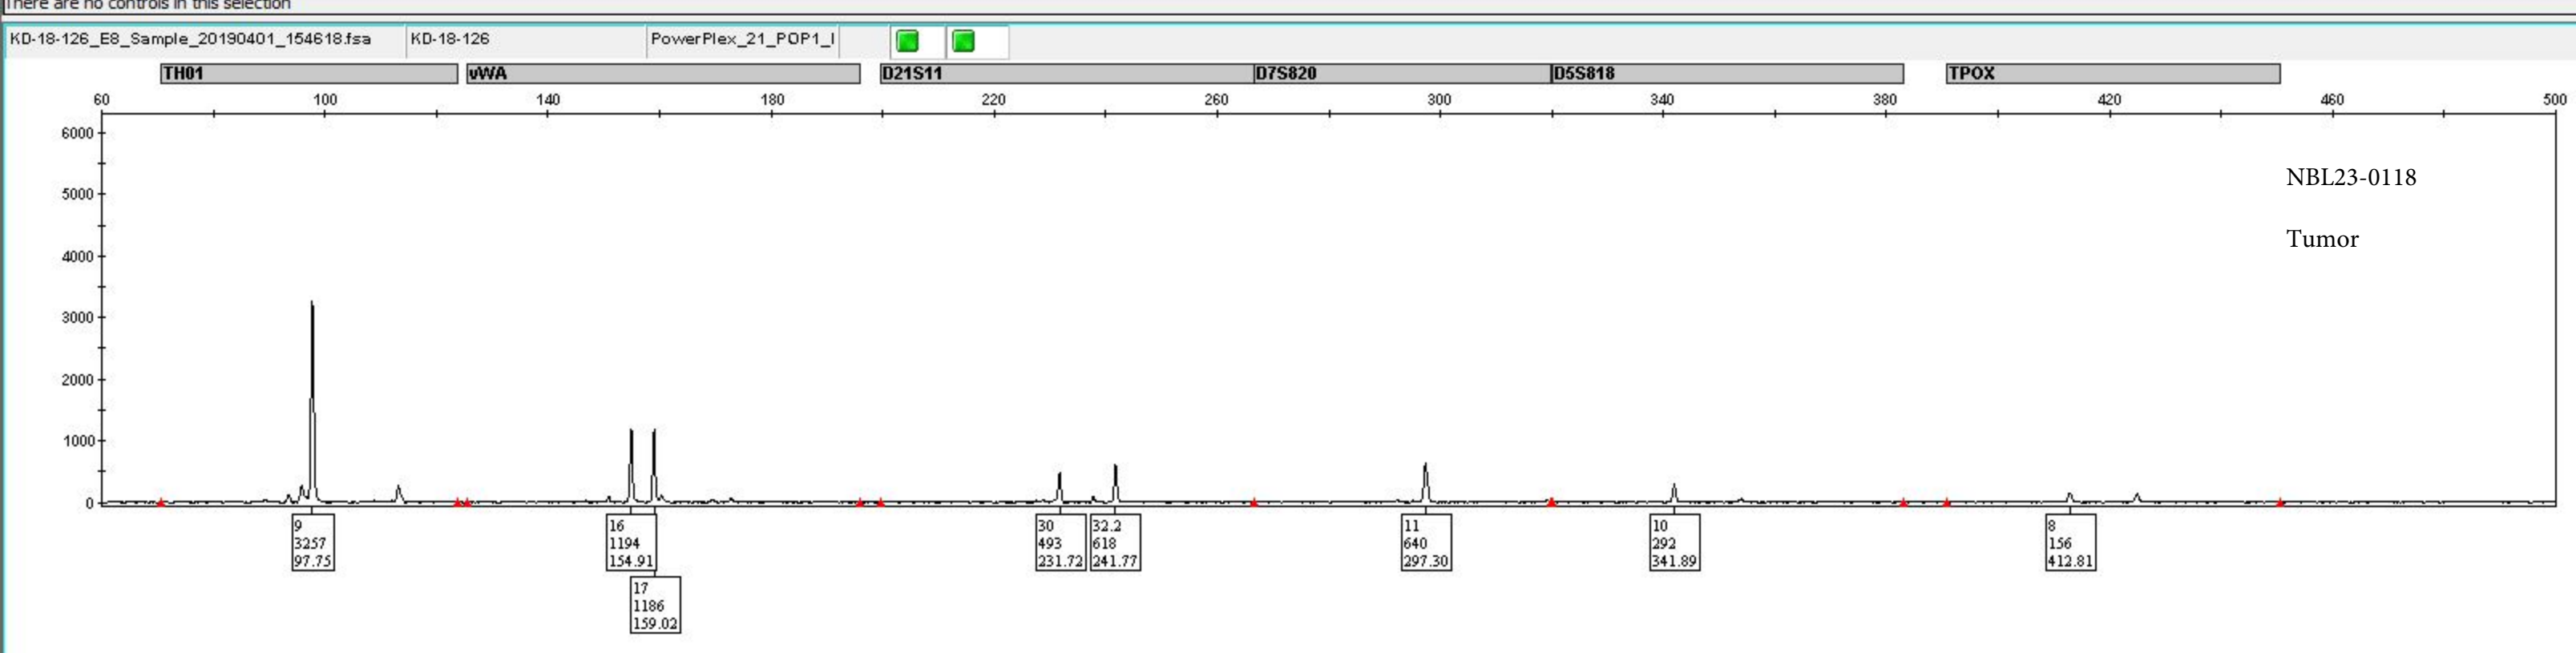

CL-23-0118\_F8\_Sample\_20190401\_154619.fsa CL-23-0118 PowerPlex\_21\_POP1\_I

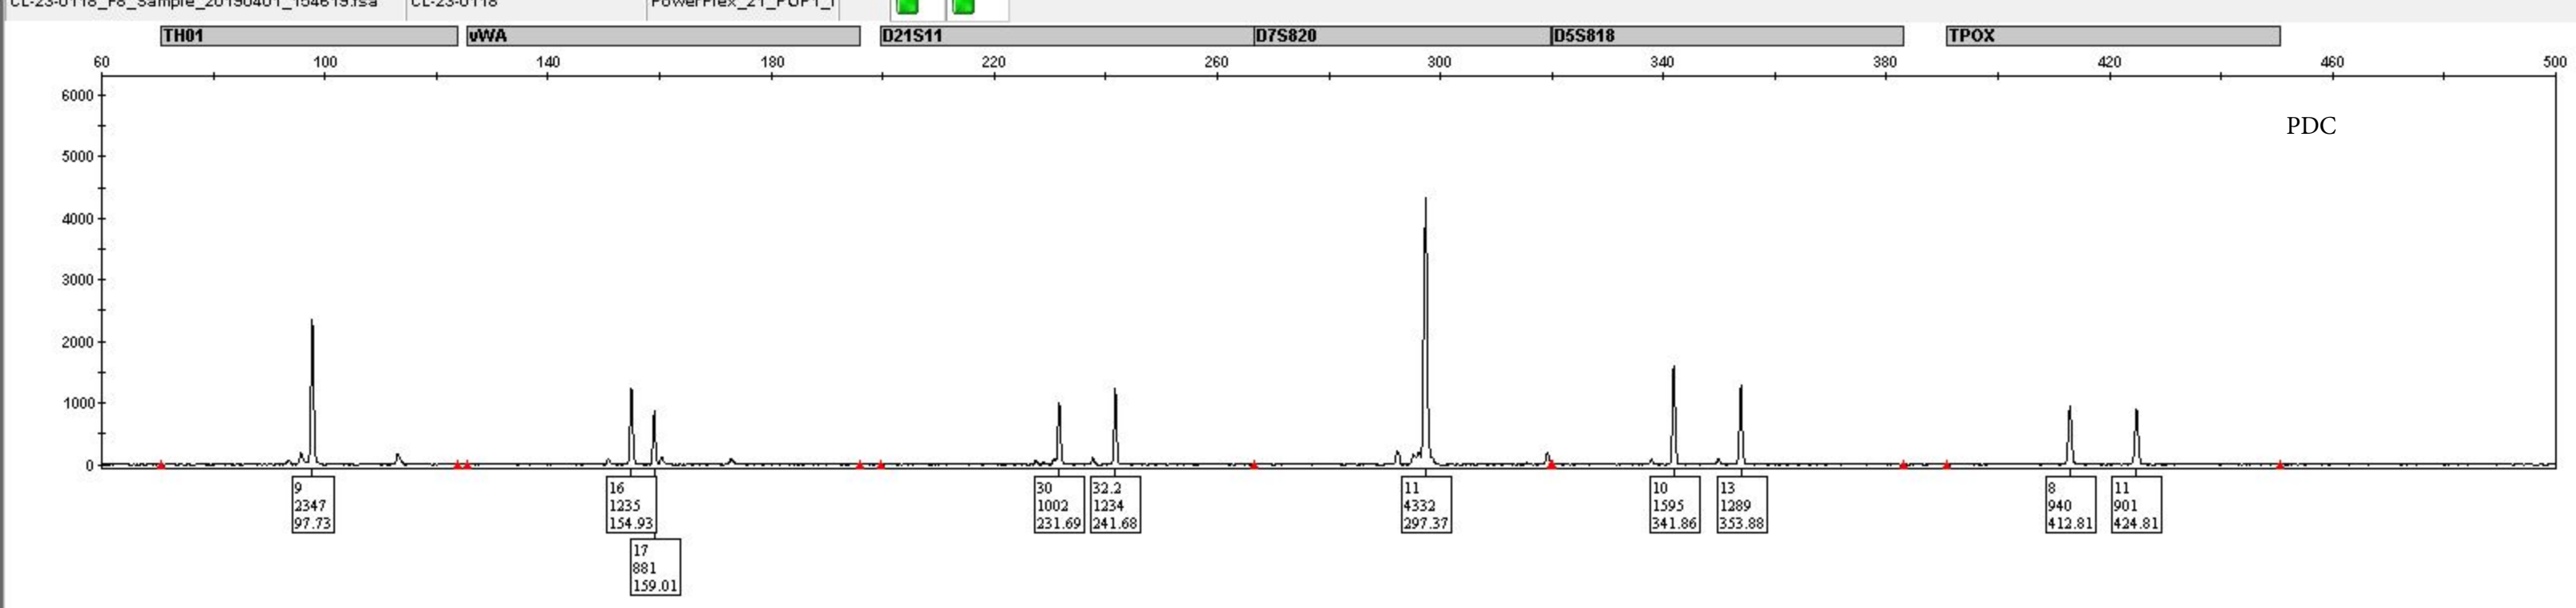

There are no controls in this selection

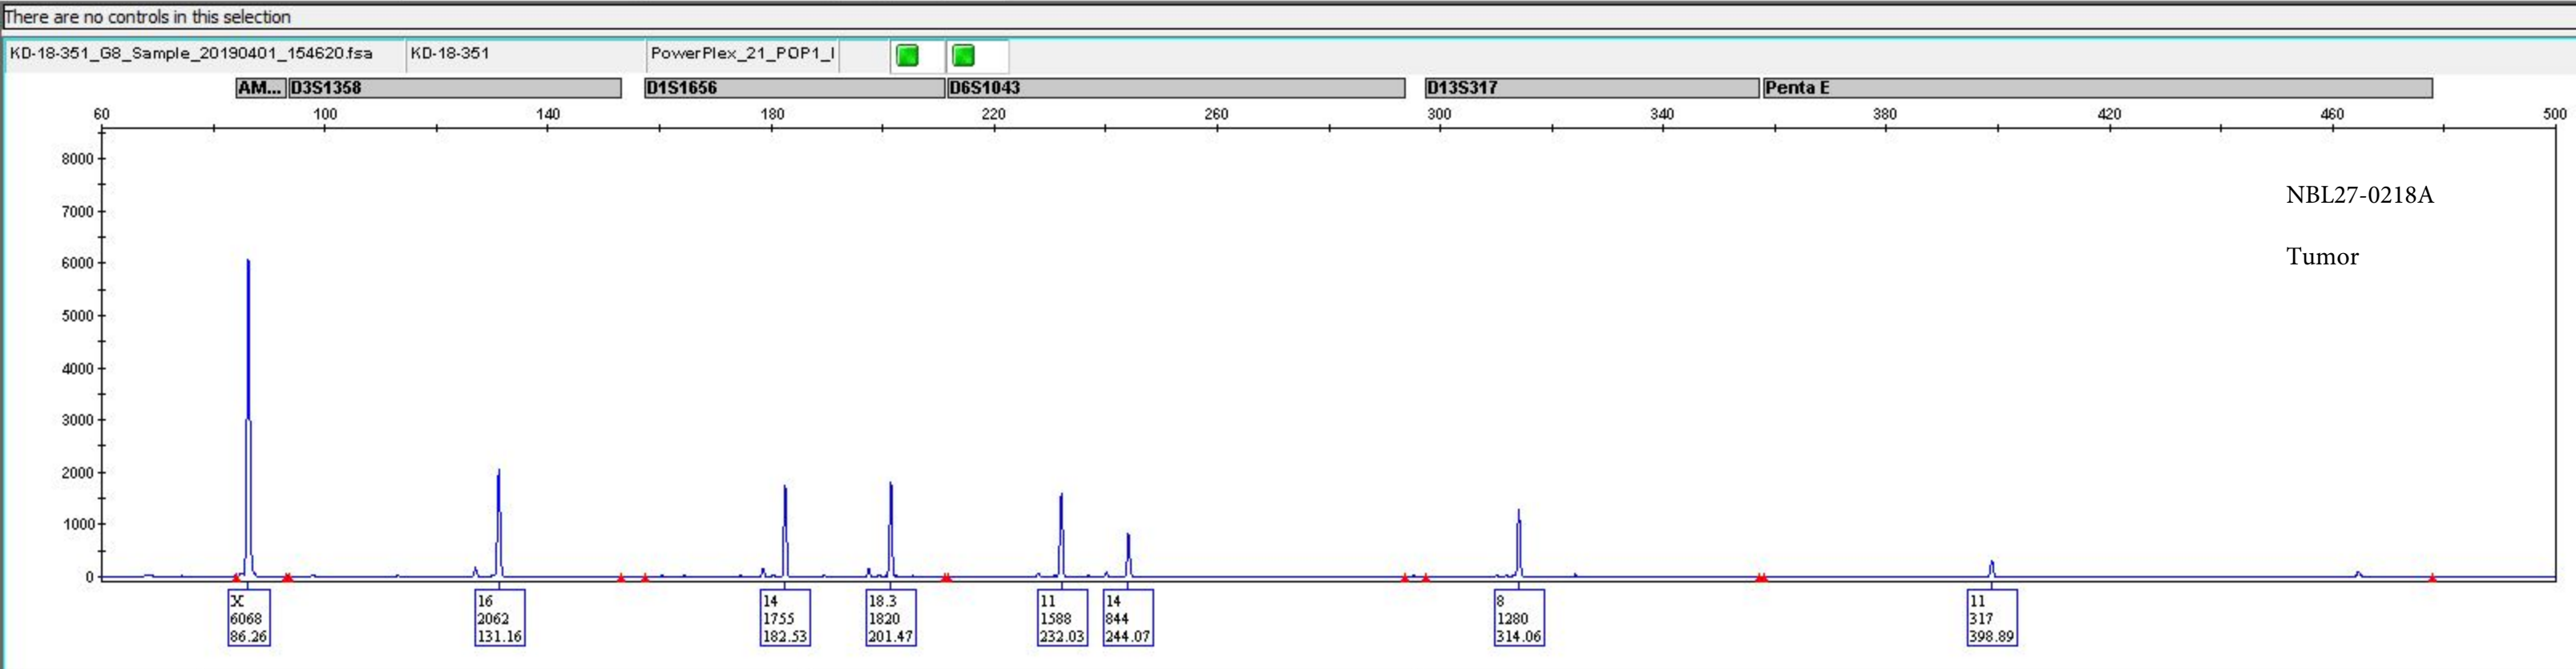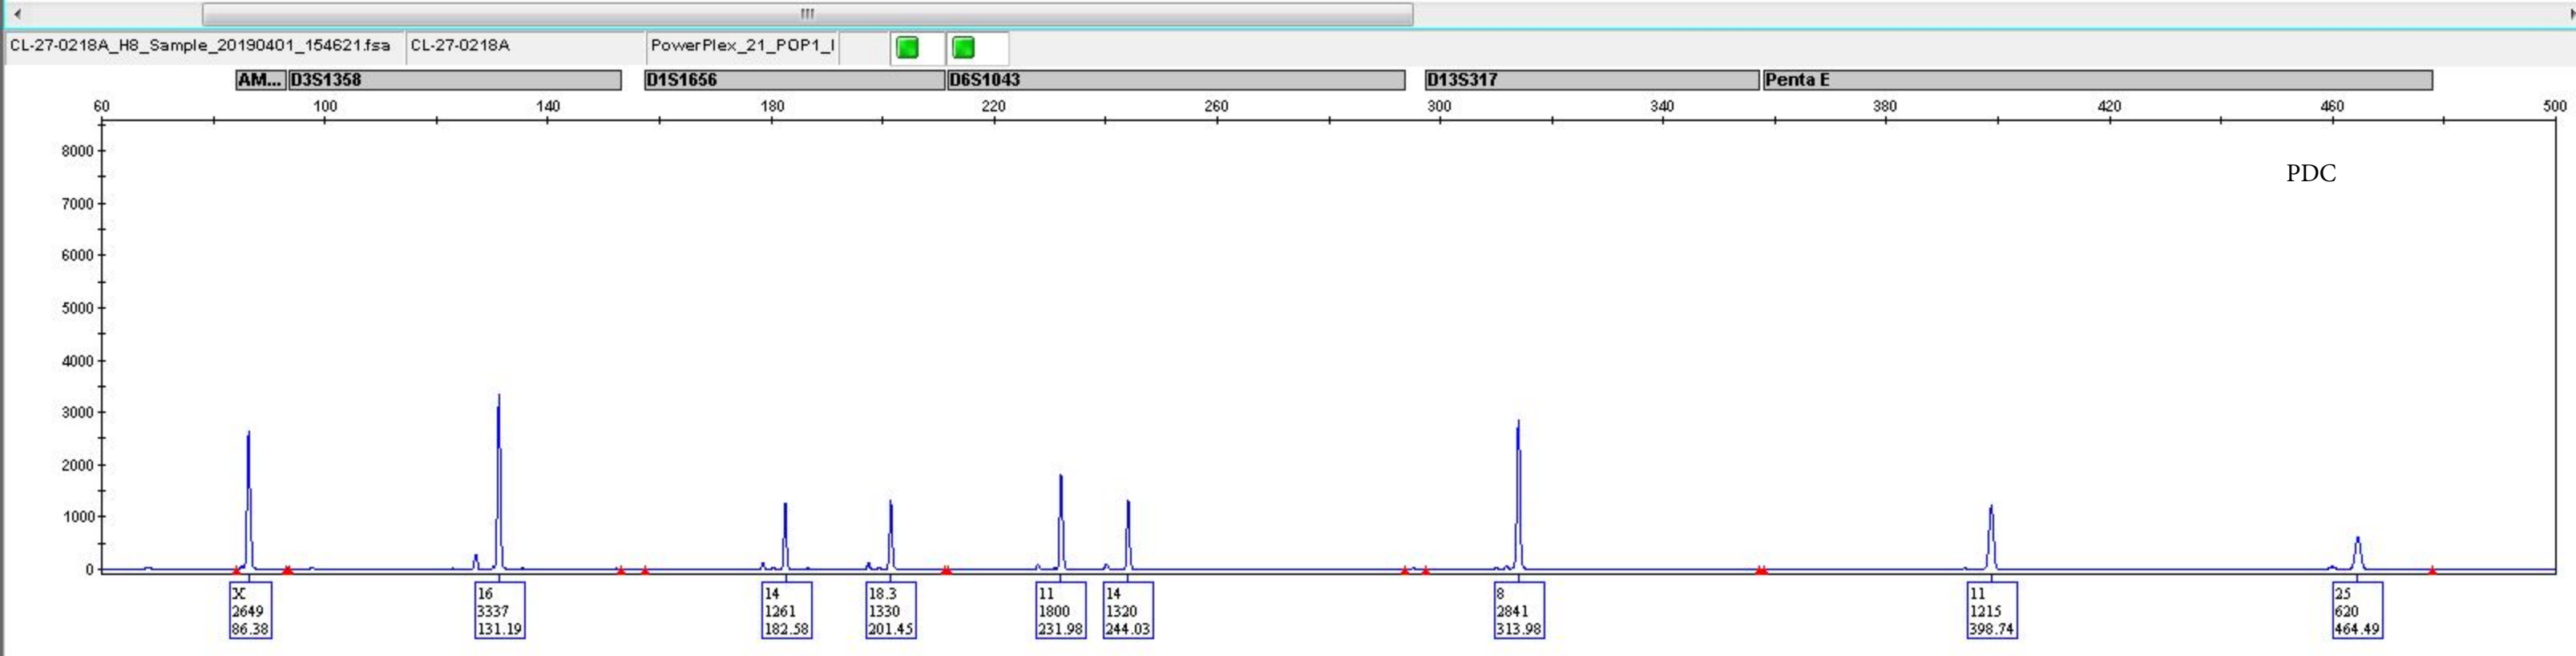

There are no controls in this selection

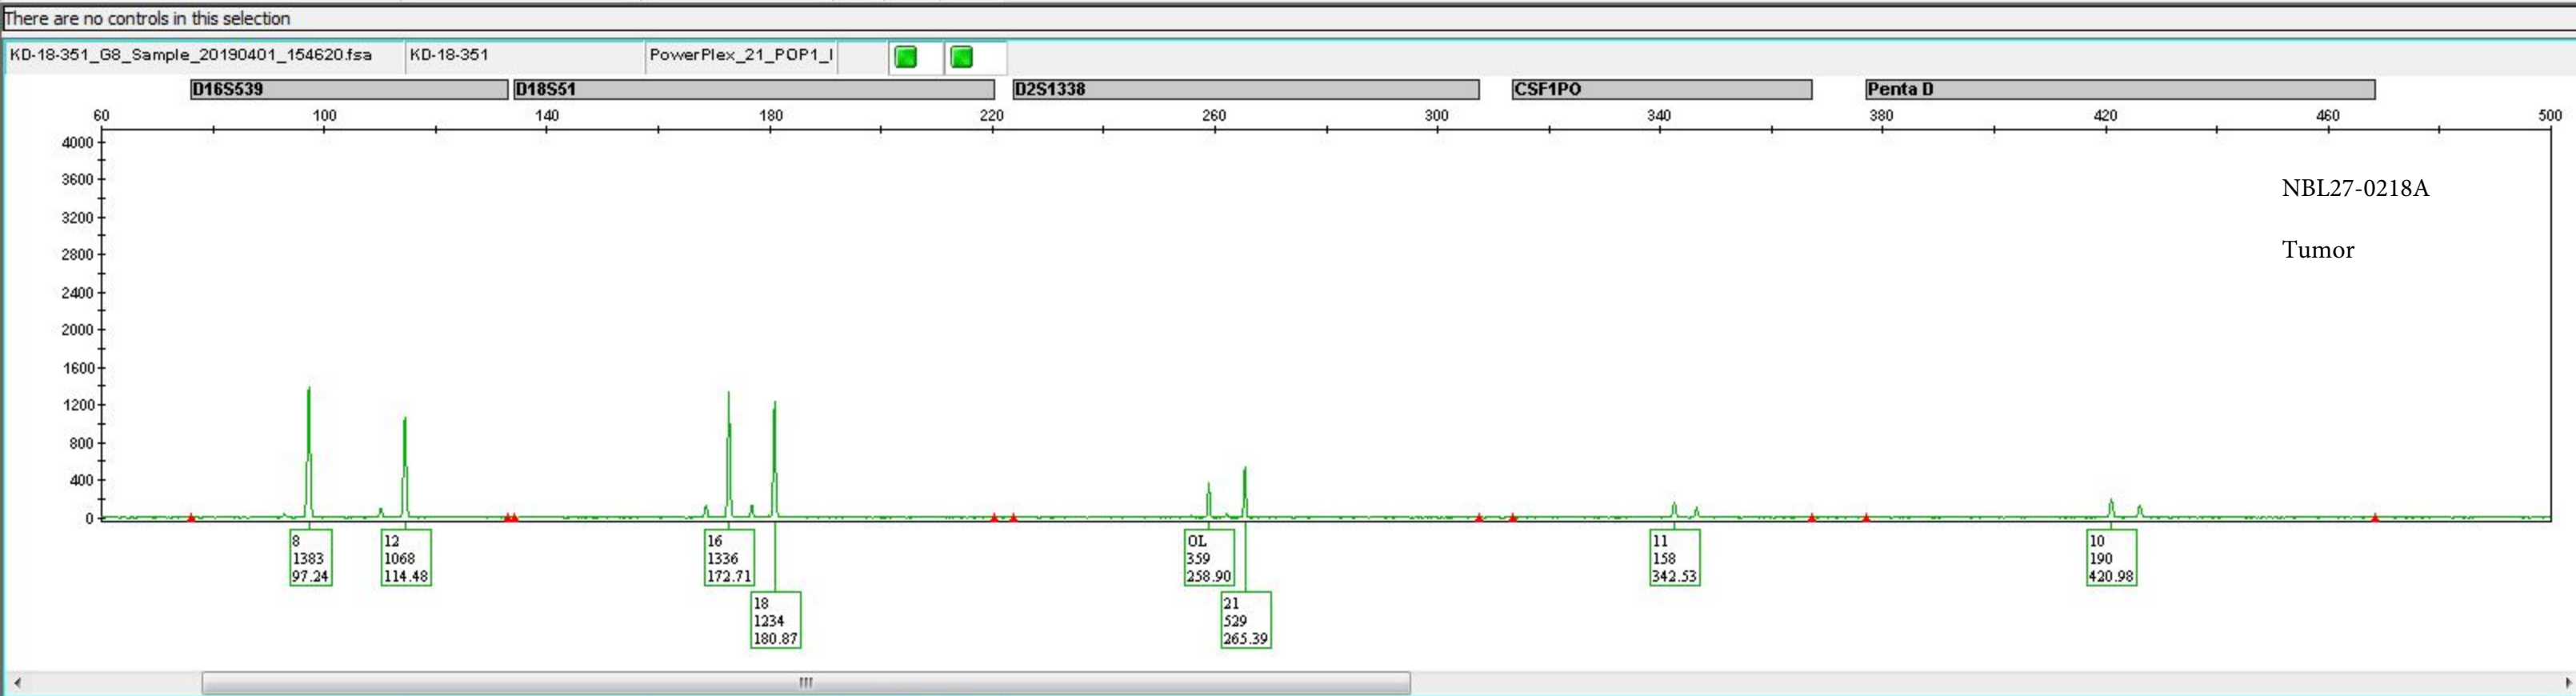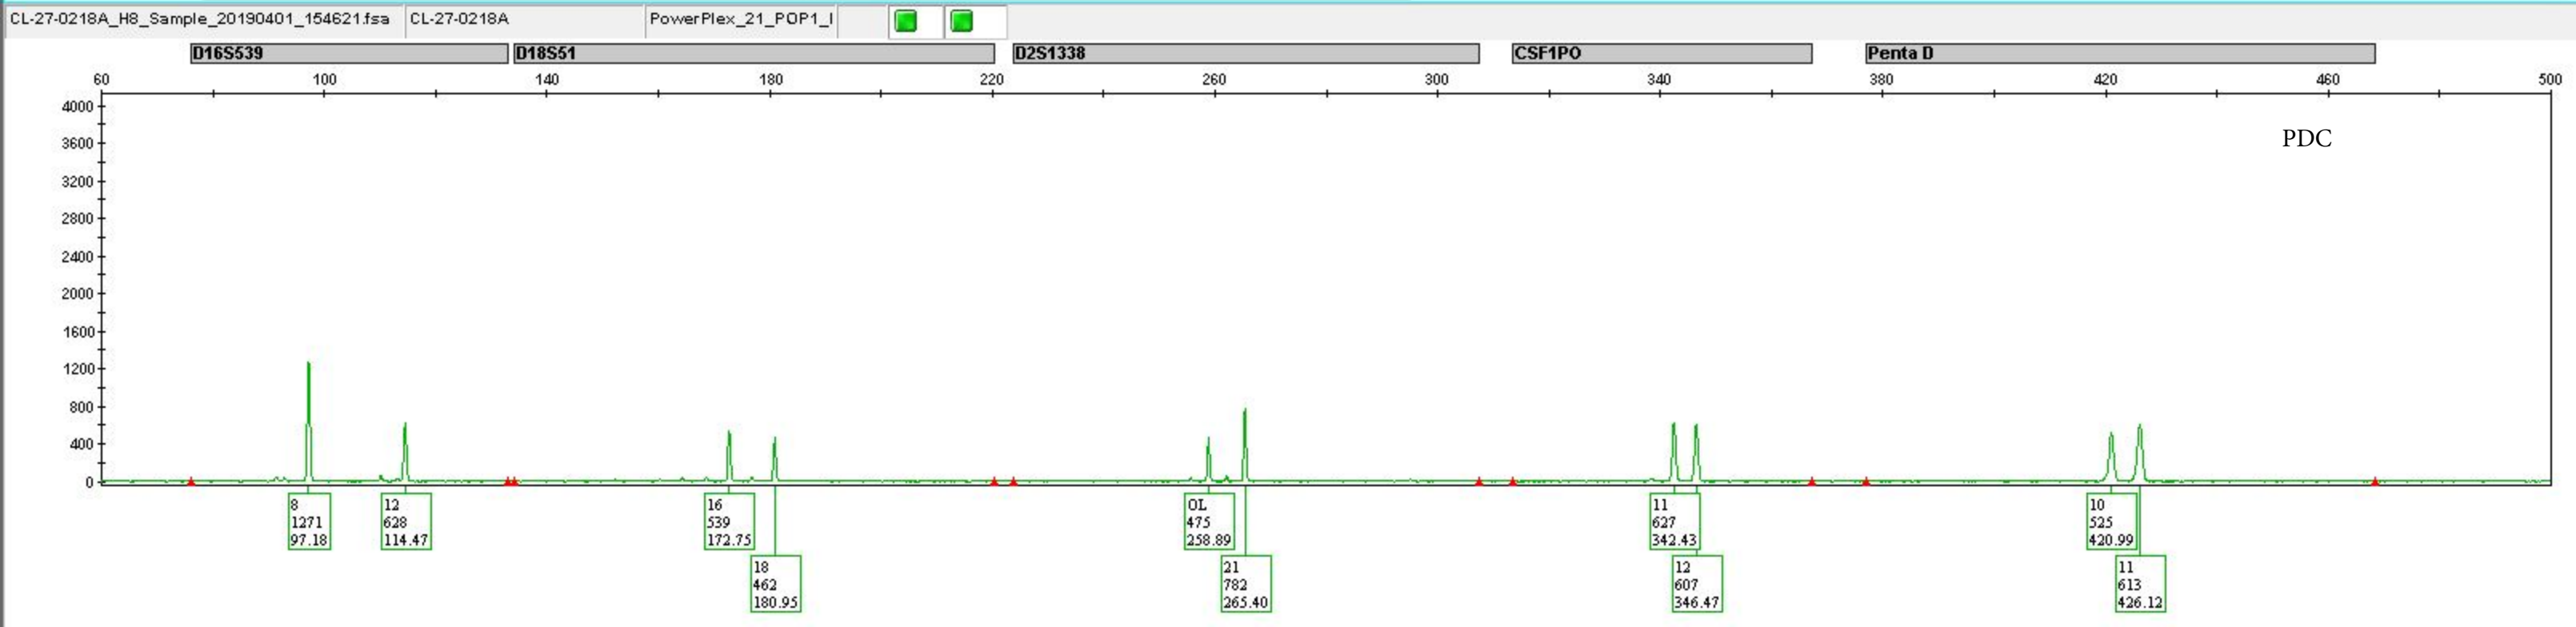

There are no controls in this selection

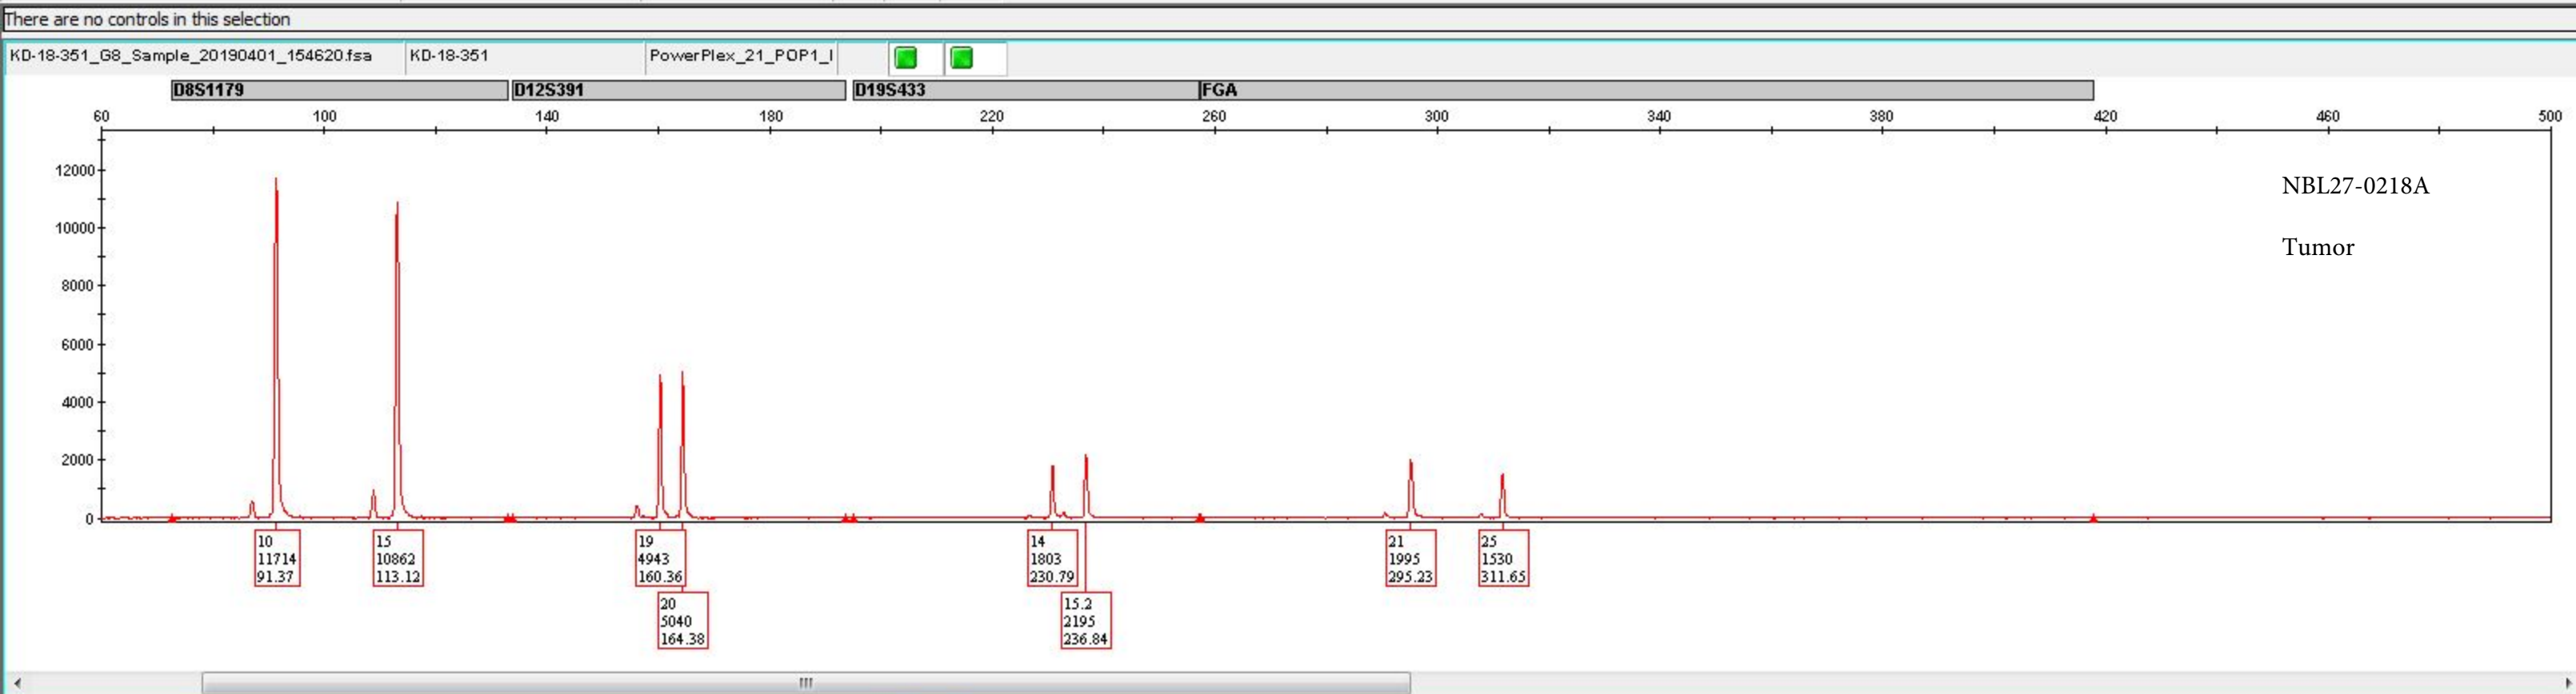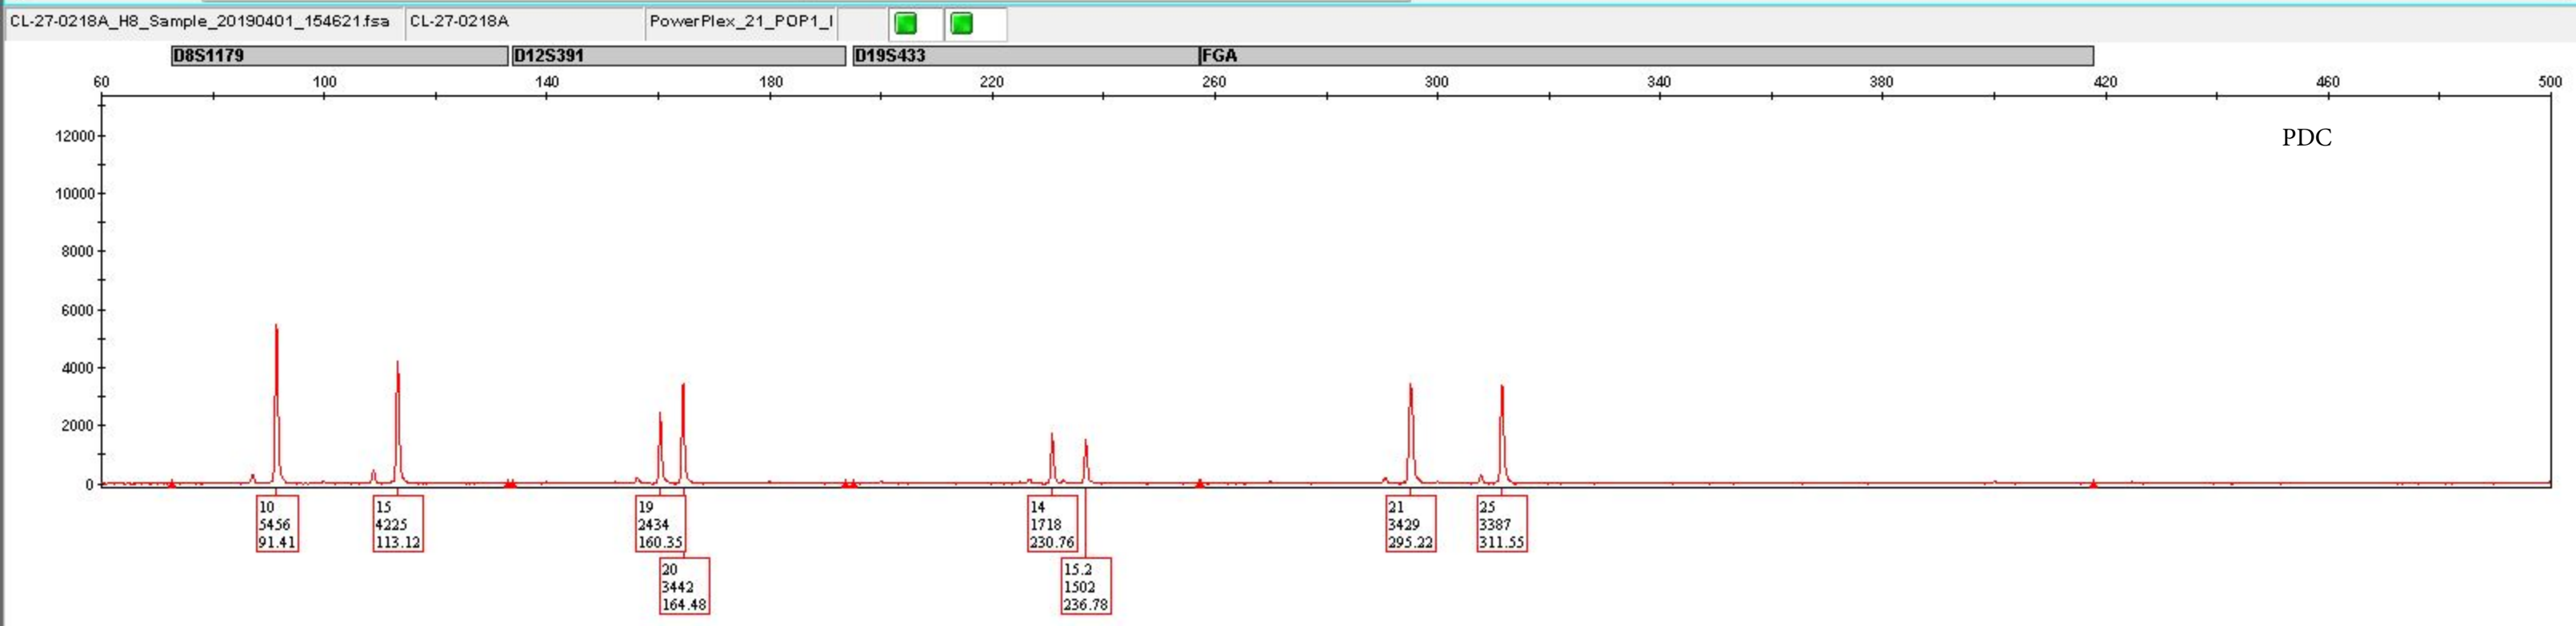

There are no controls in this selection

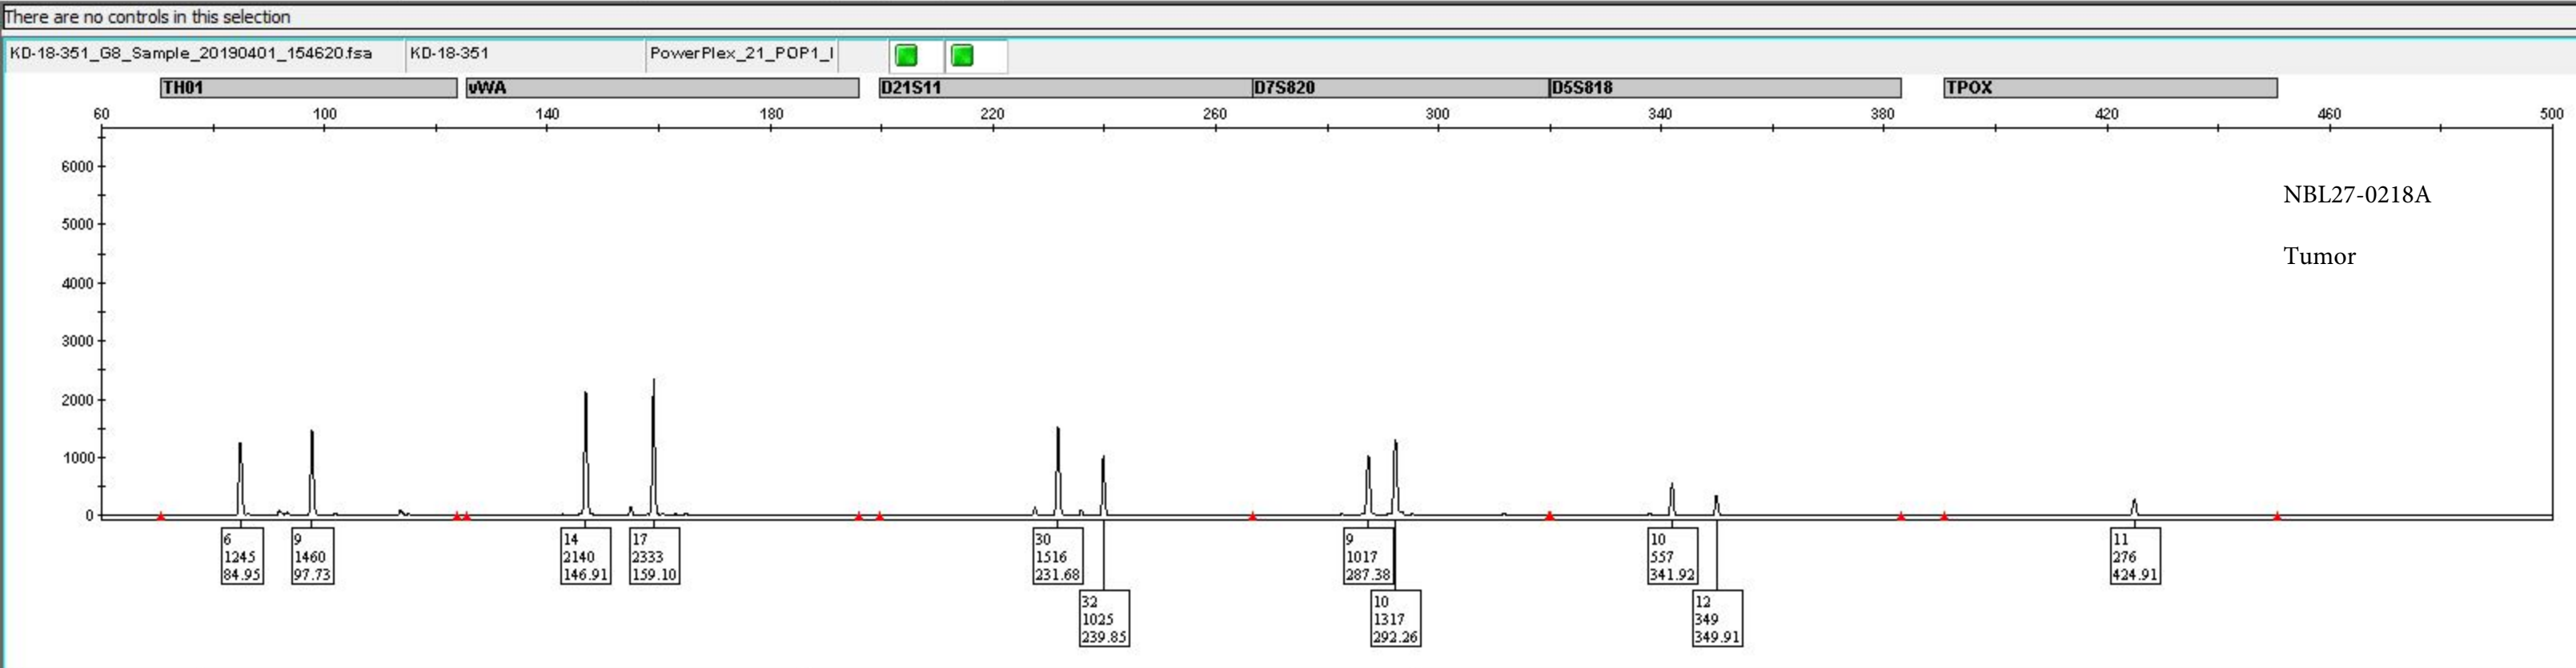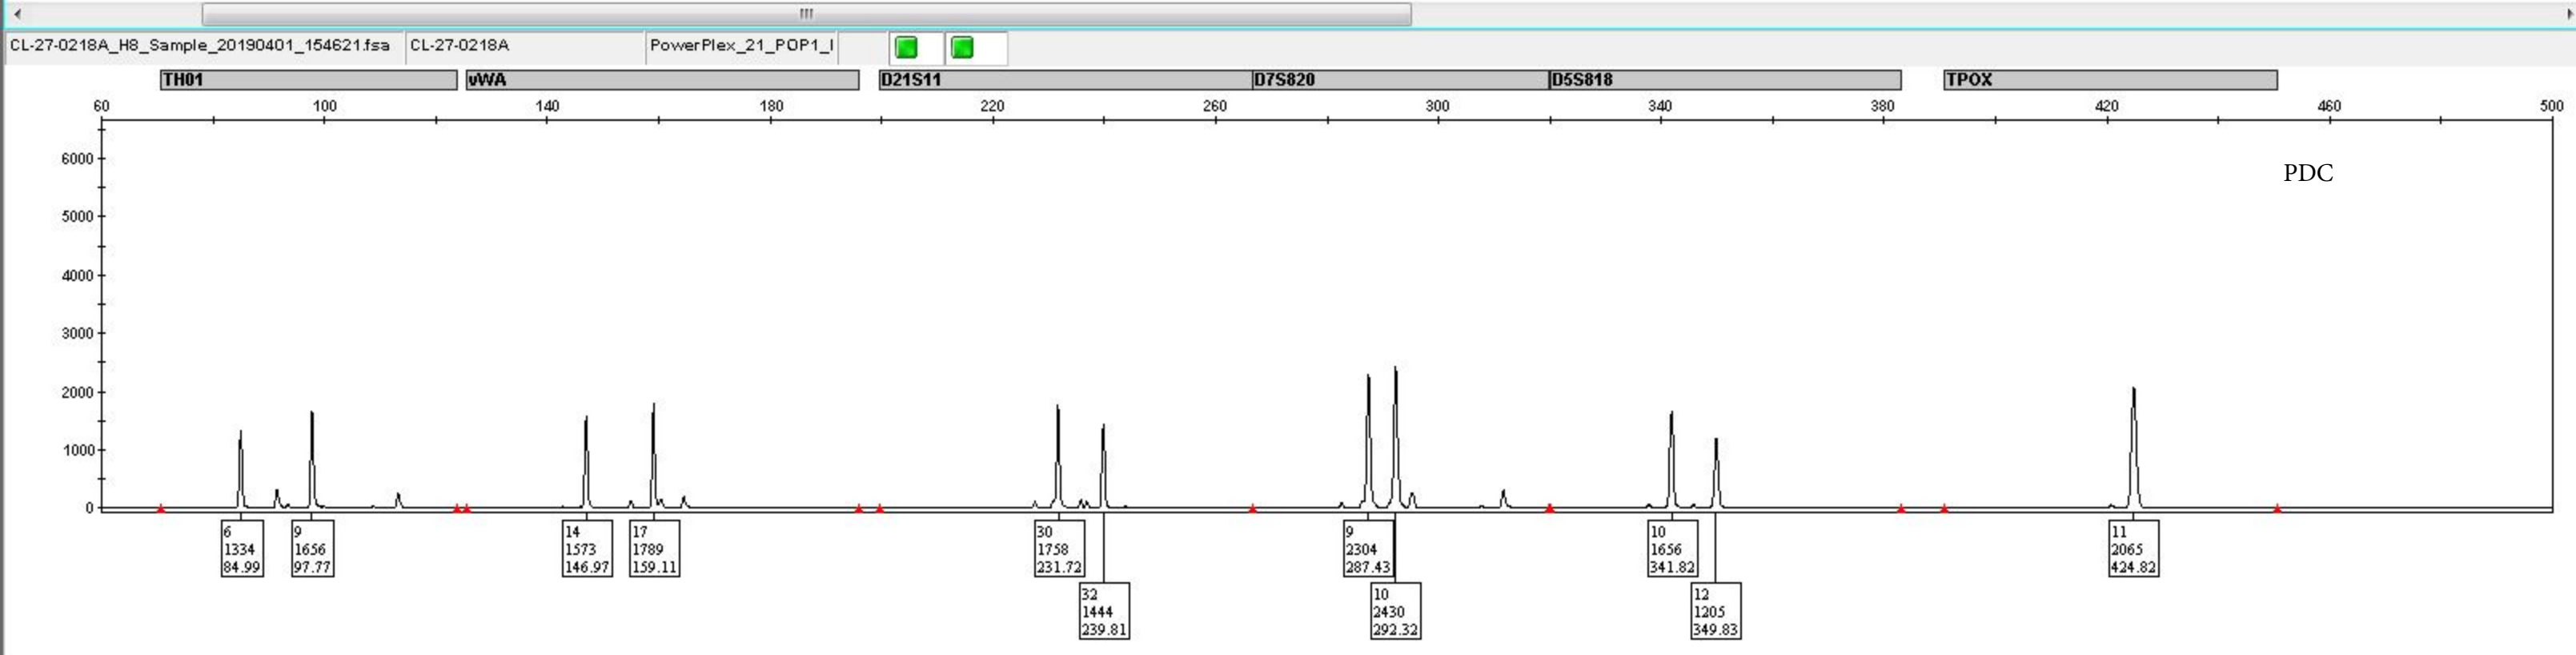



There are no controls in this selection

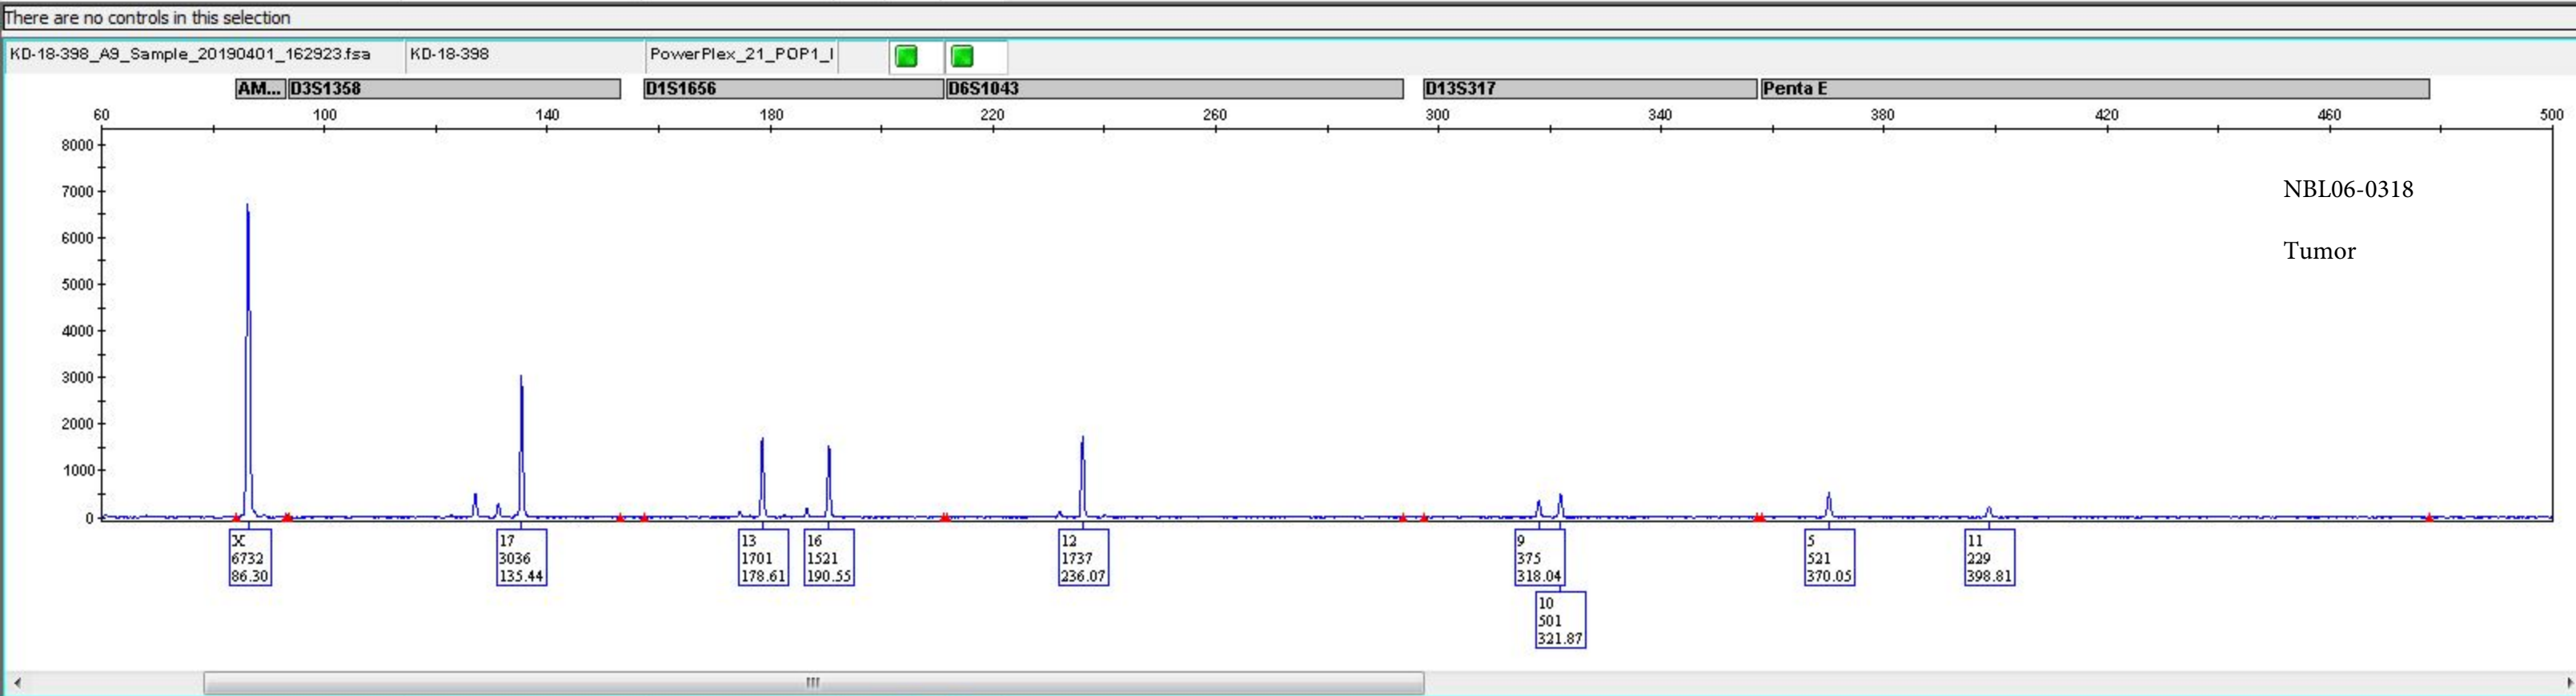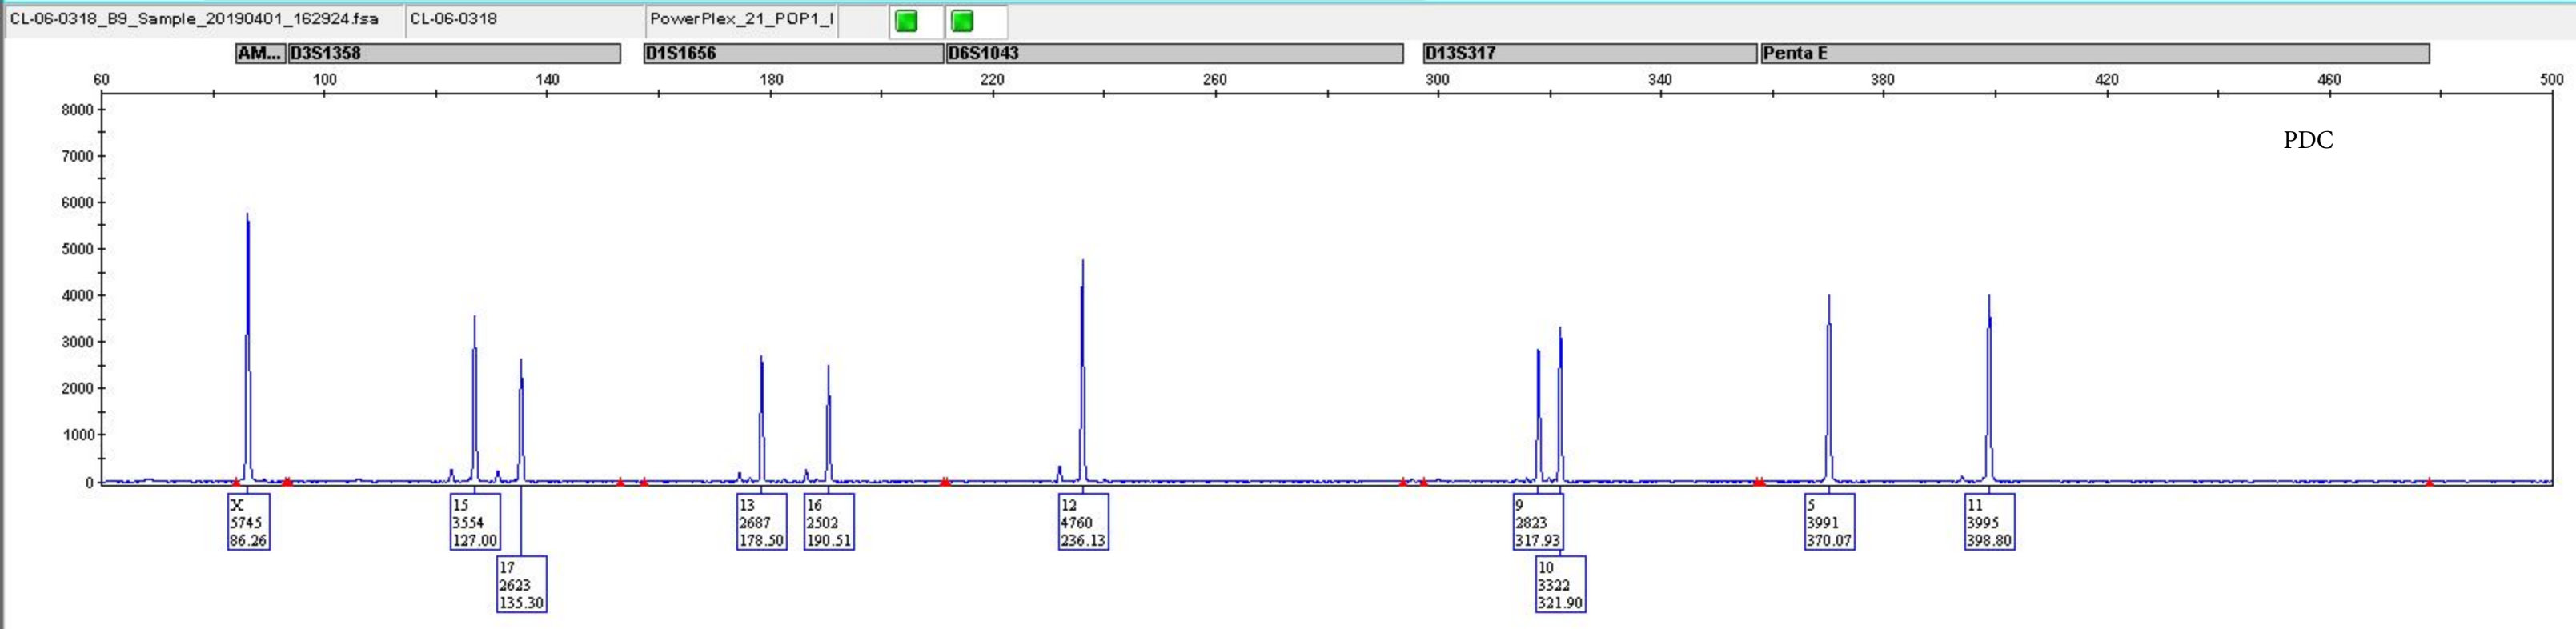

There are no controls in this selection

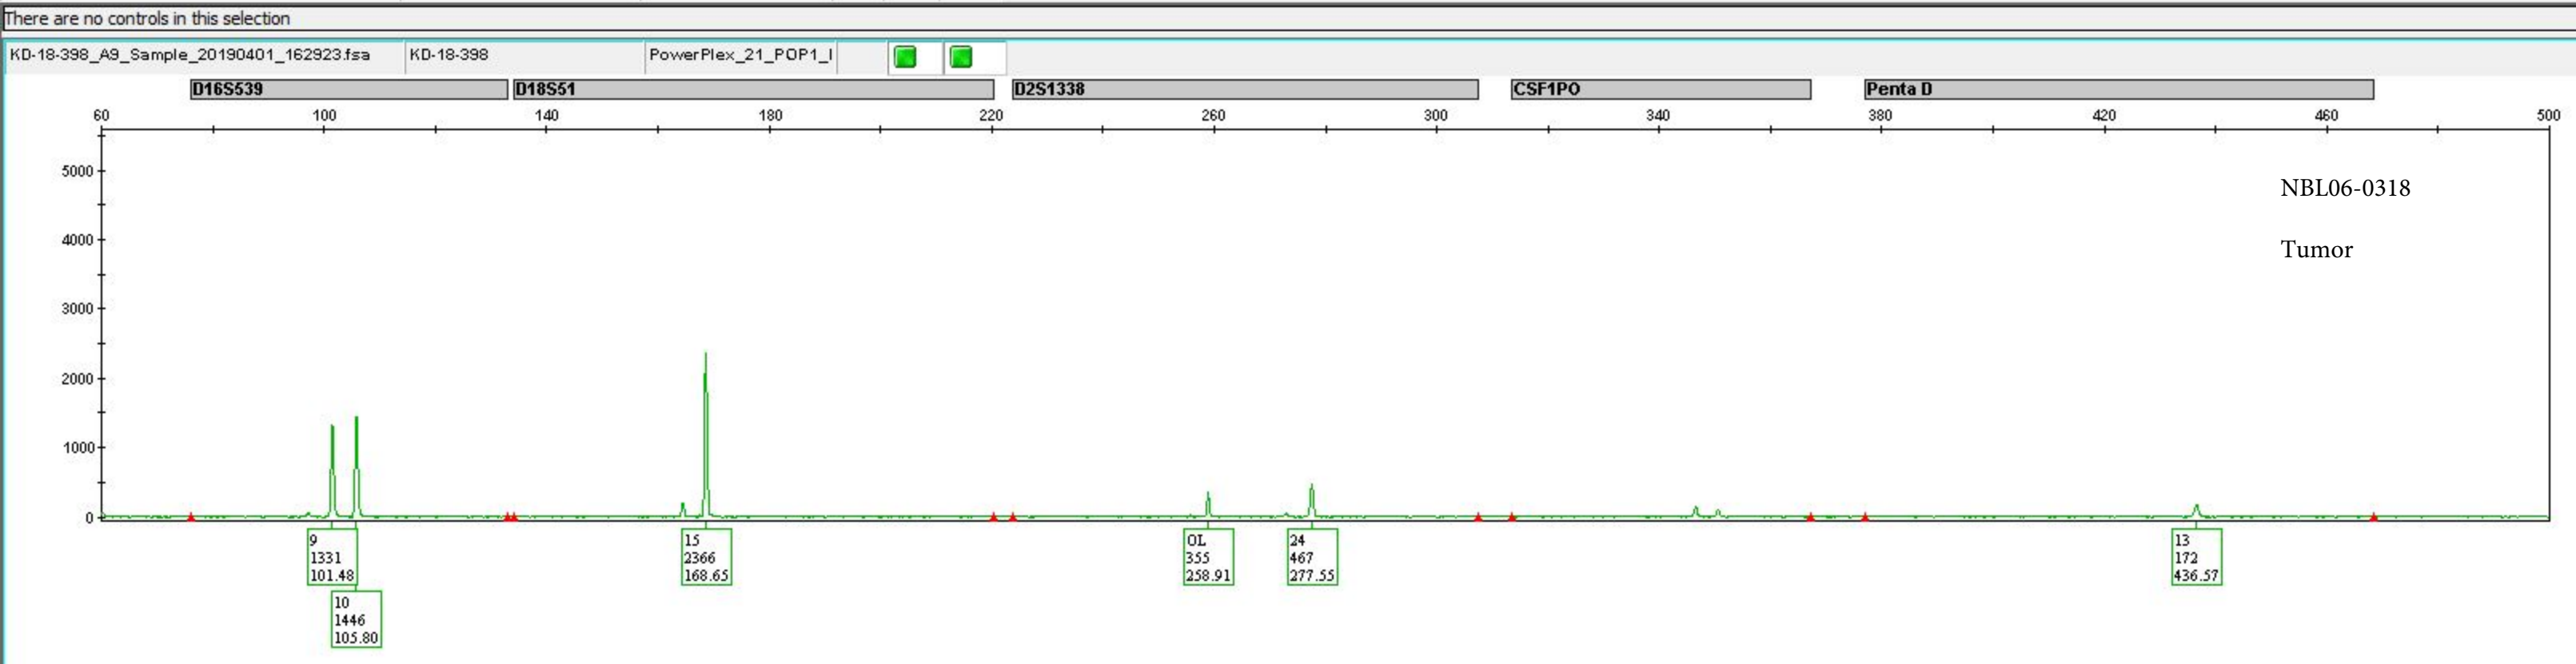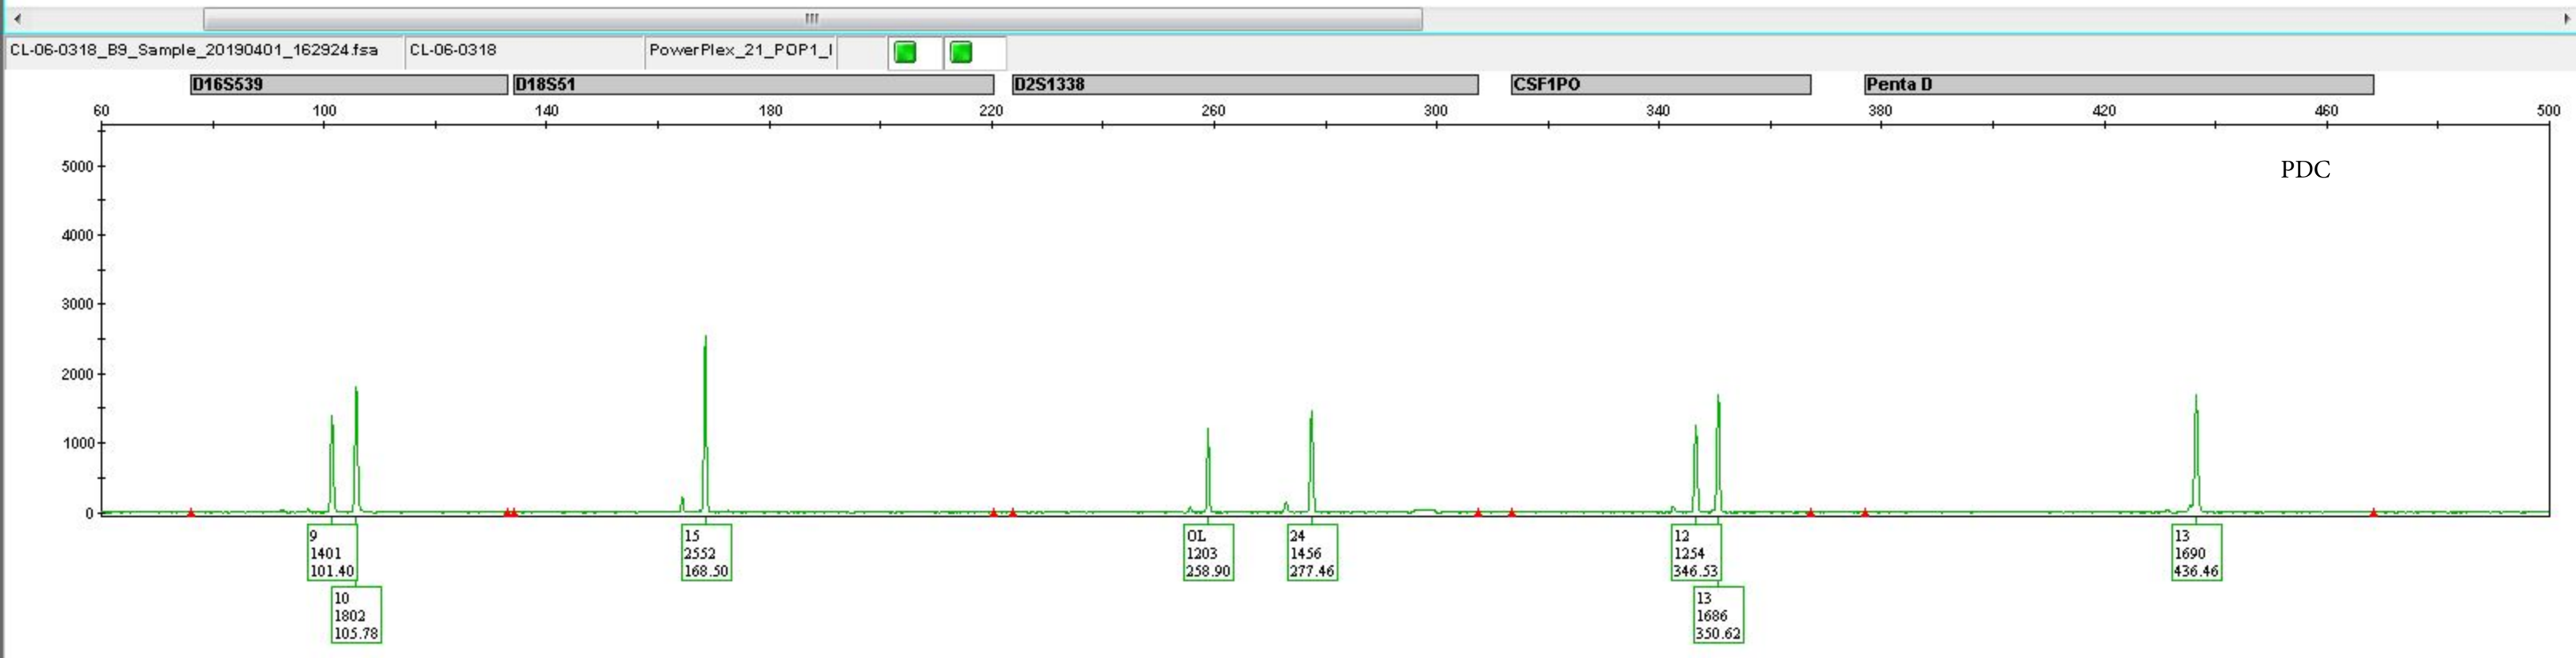

| Sample Name | Panel | SQI | OS | SQ |
|-------------|-------|-----|----|----|
|-------------|-------|-----|----|----|

There are no controls in this selection

| Sample File | Sample Name | Panel | SQI | OS | SQ |
|-------------|-------------|-------|-----|----|----|
|-------------|-------------|-------|-----|----|----|

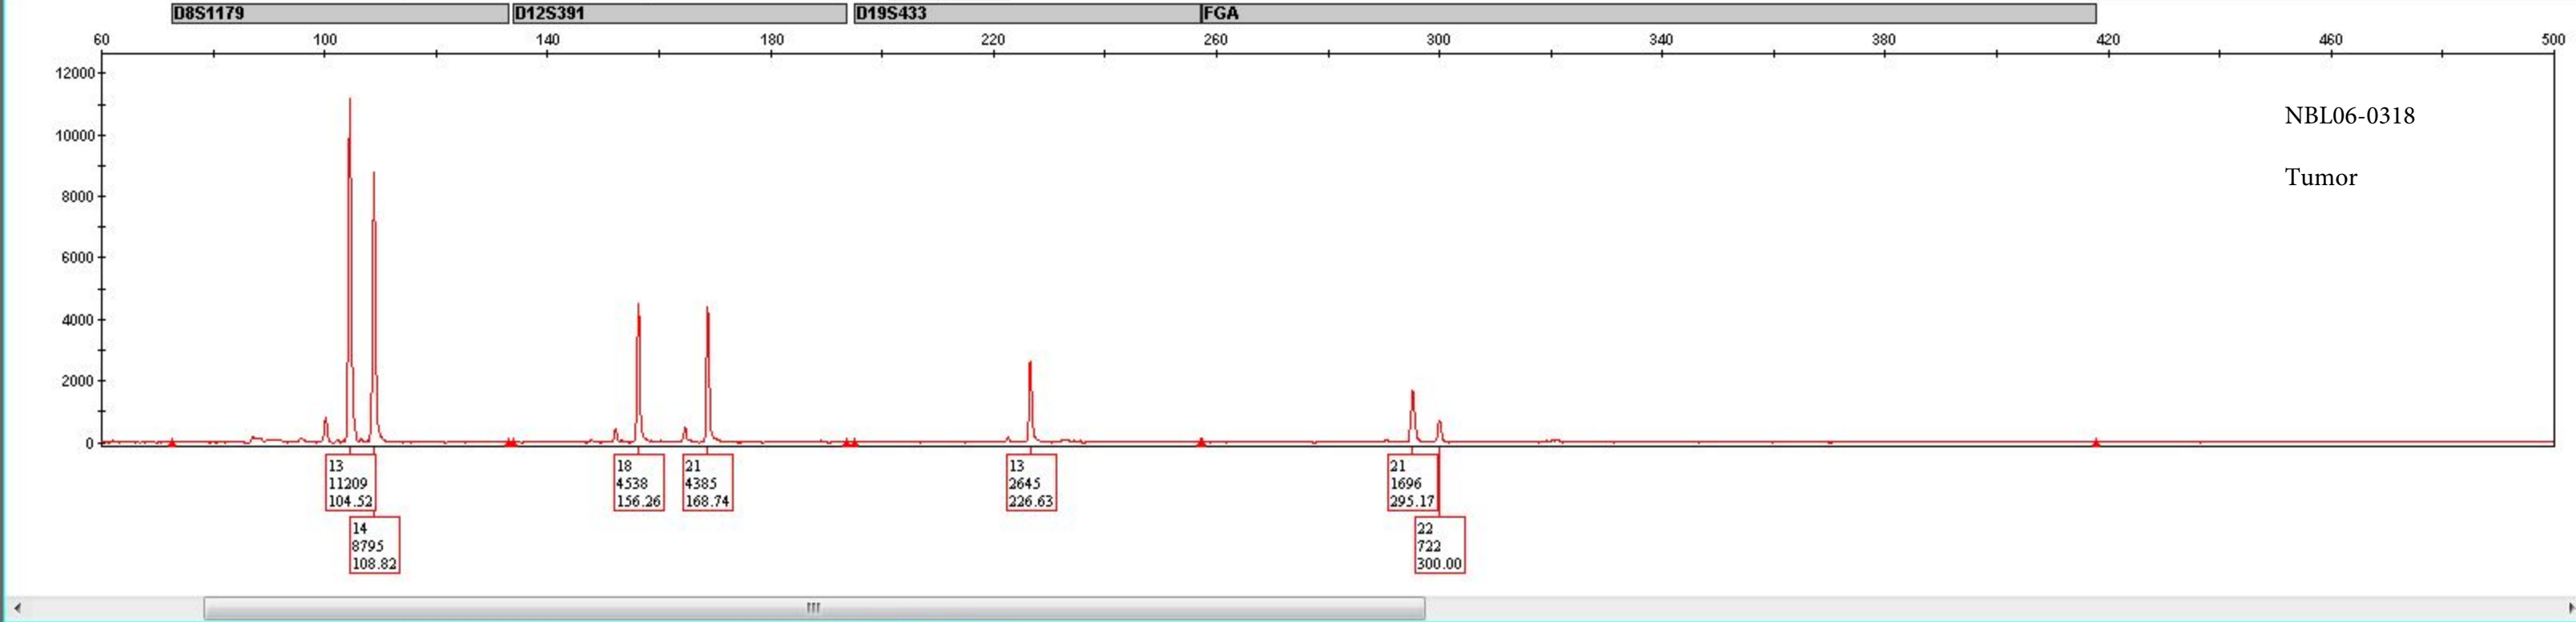

| Sample File | Sample Name | Panel | SQI | OS | SQ |
|-------------|-------------|-------|-----|----|----|
|-------------|-------------|-------|-----|----|----|

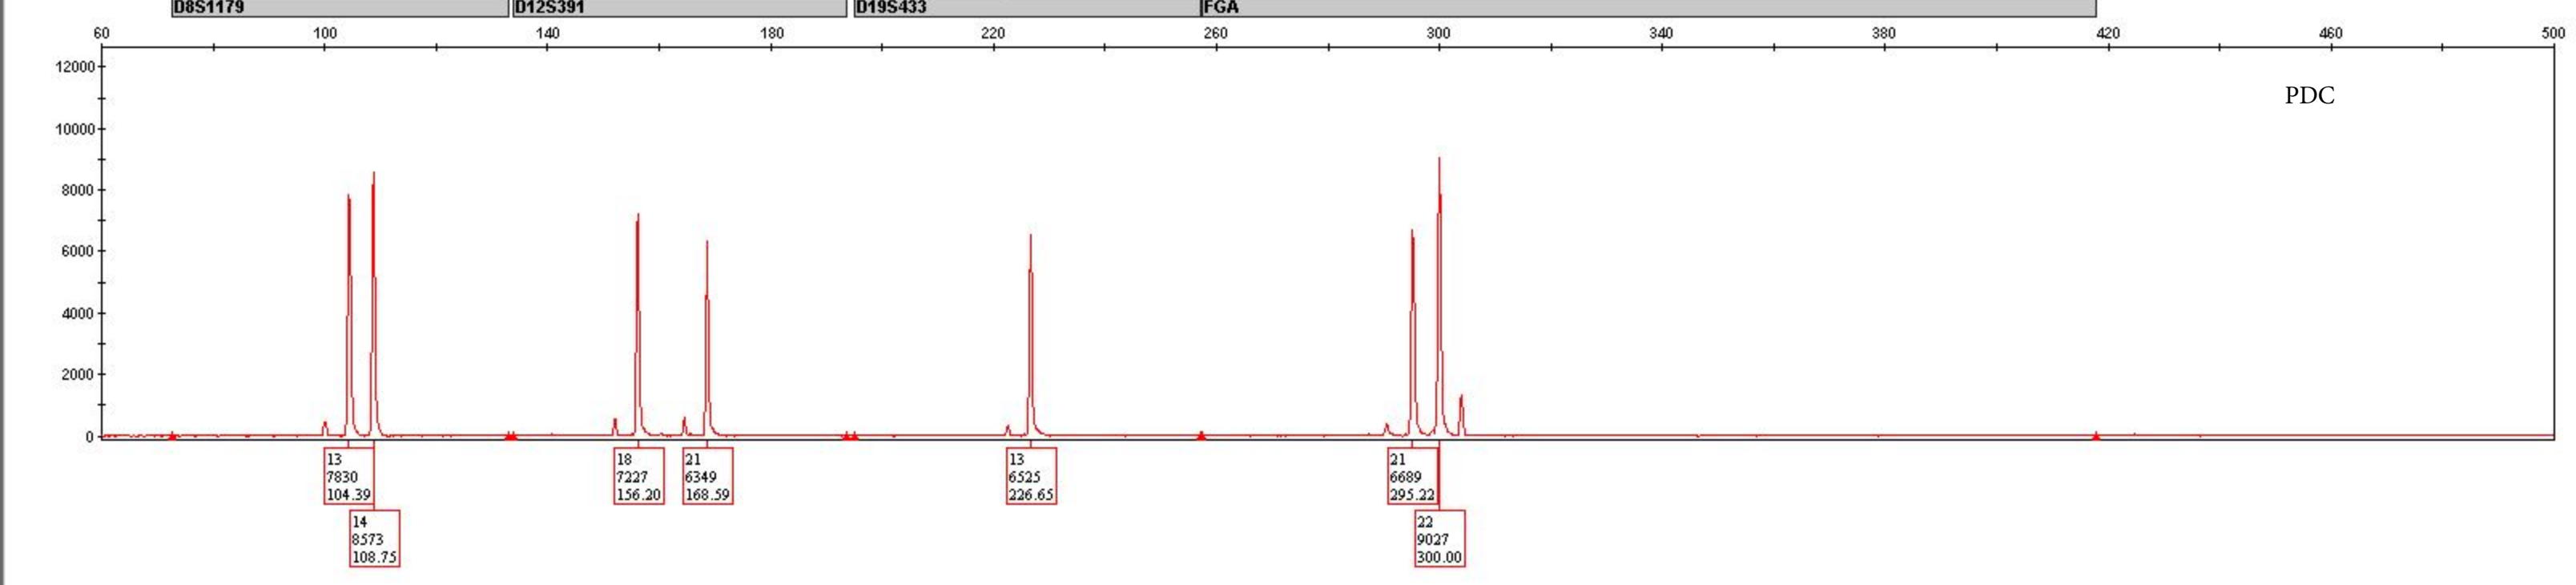

There are no controls in this selection

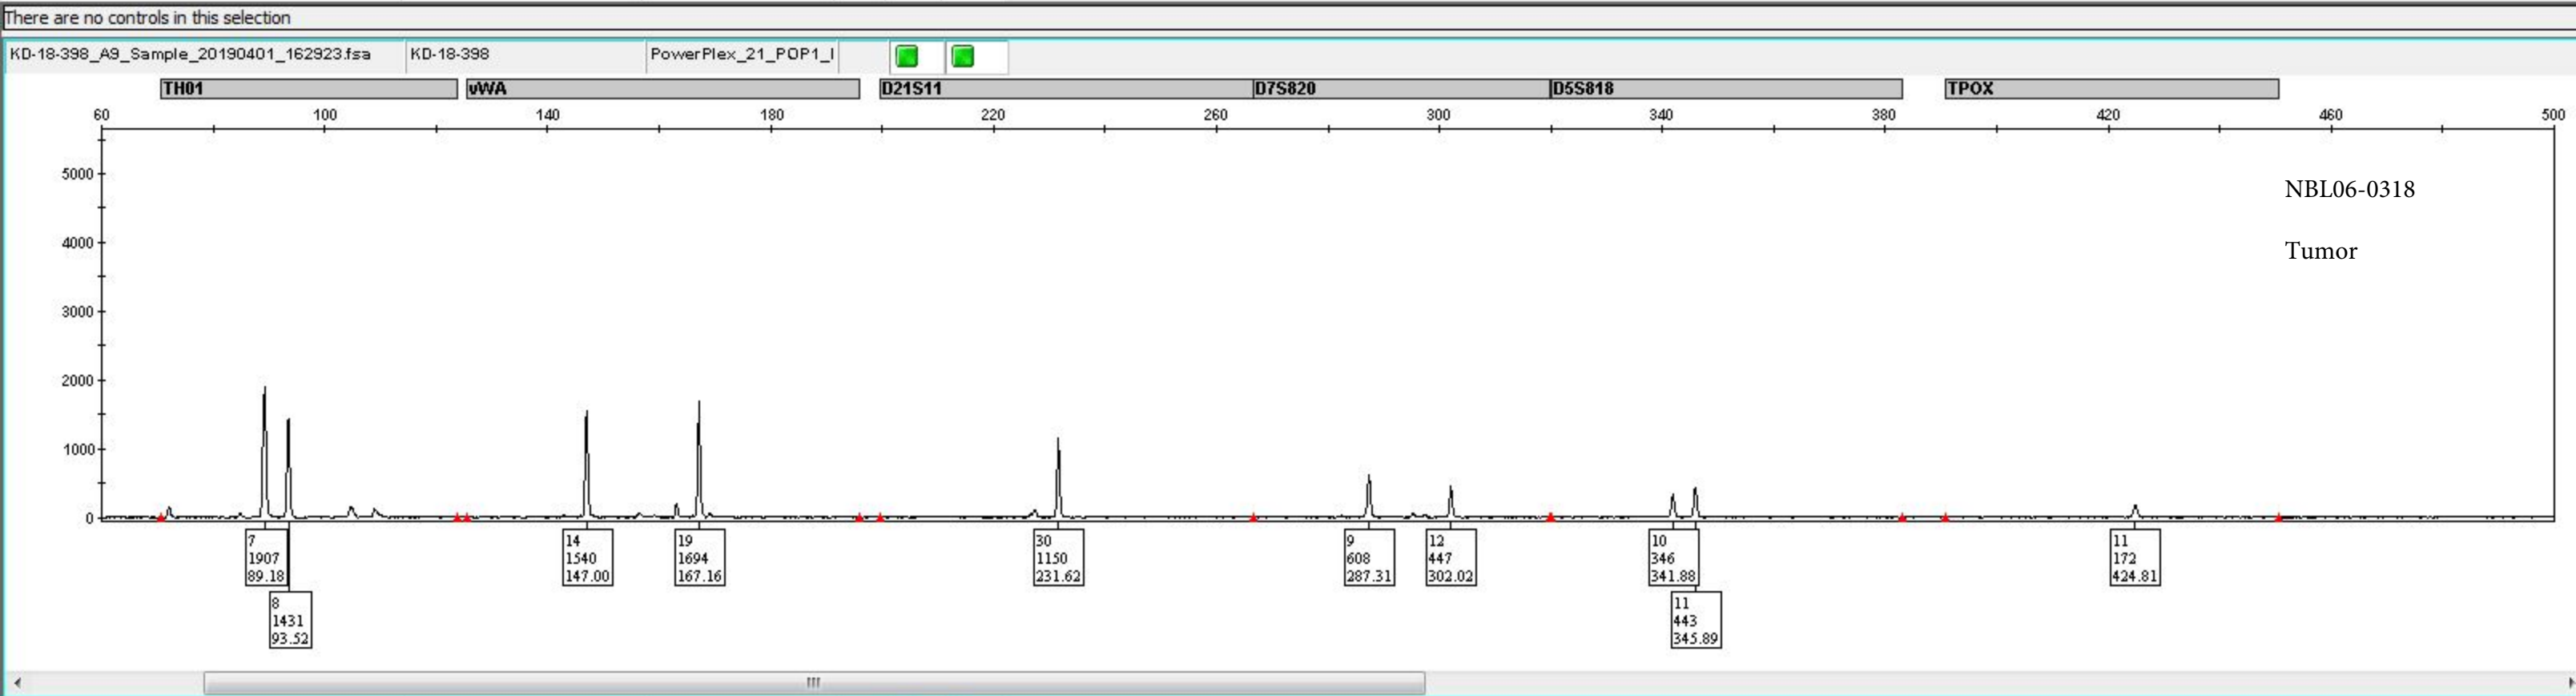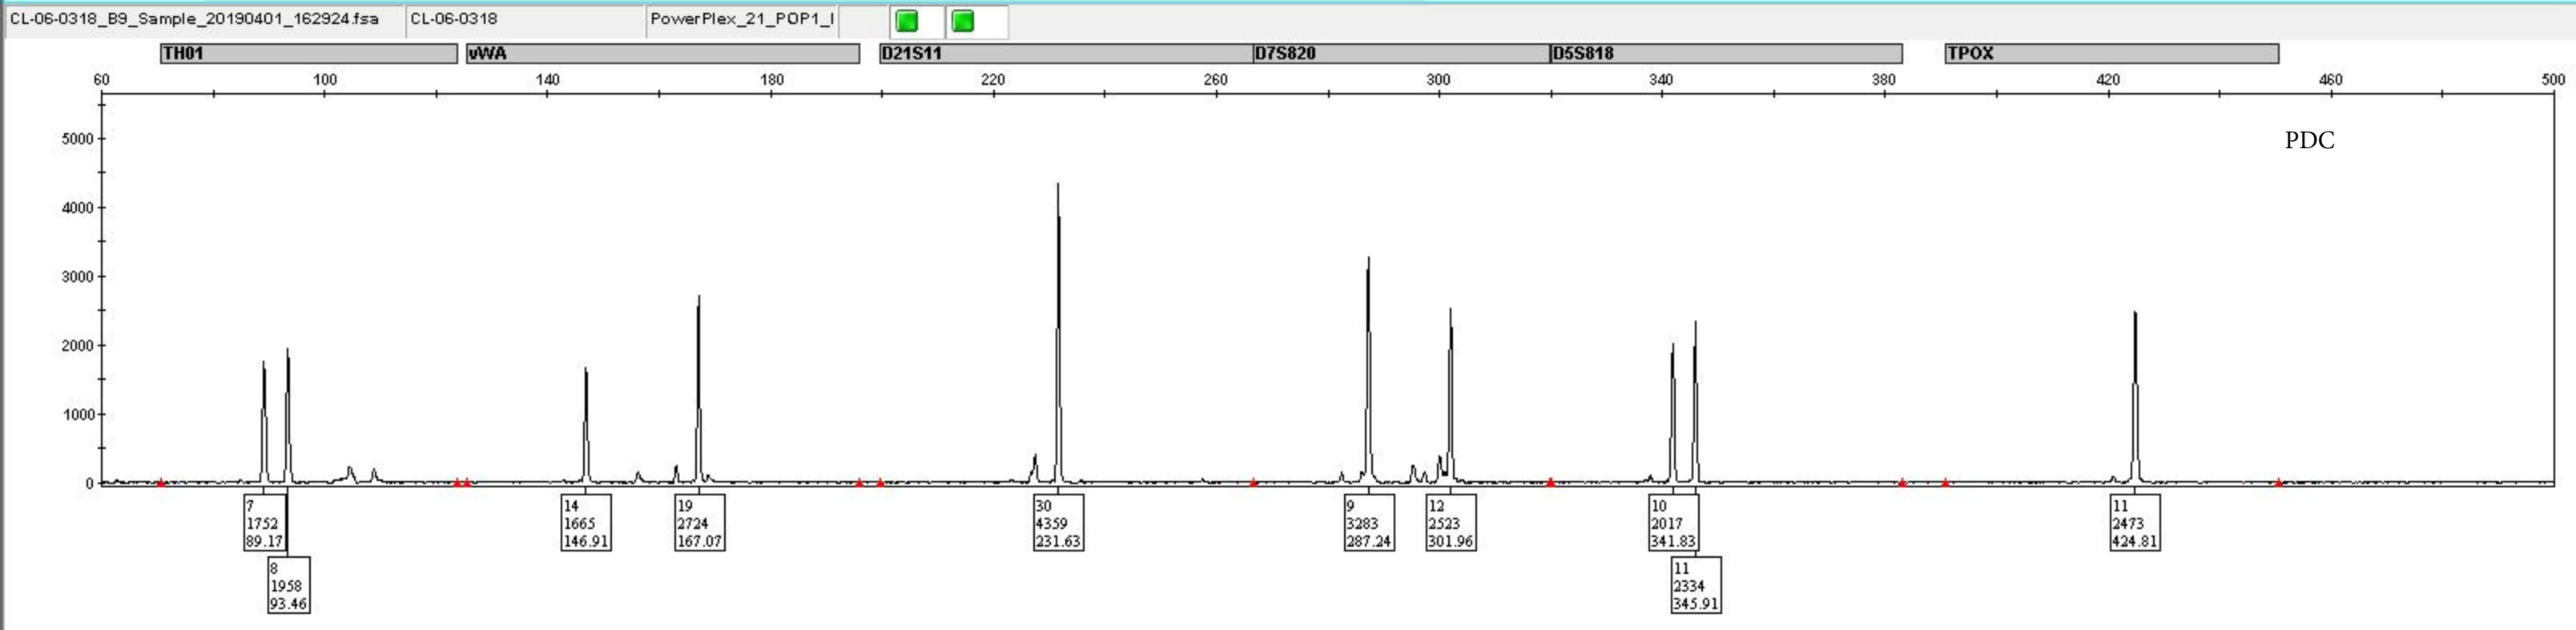

There are no controls in this selection

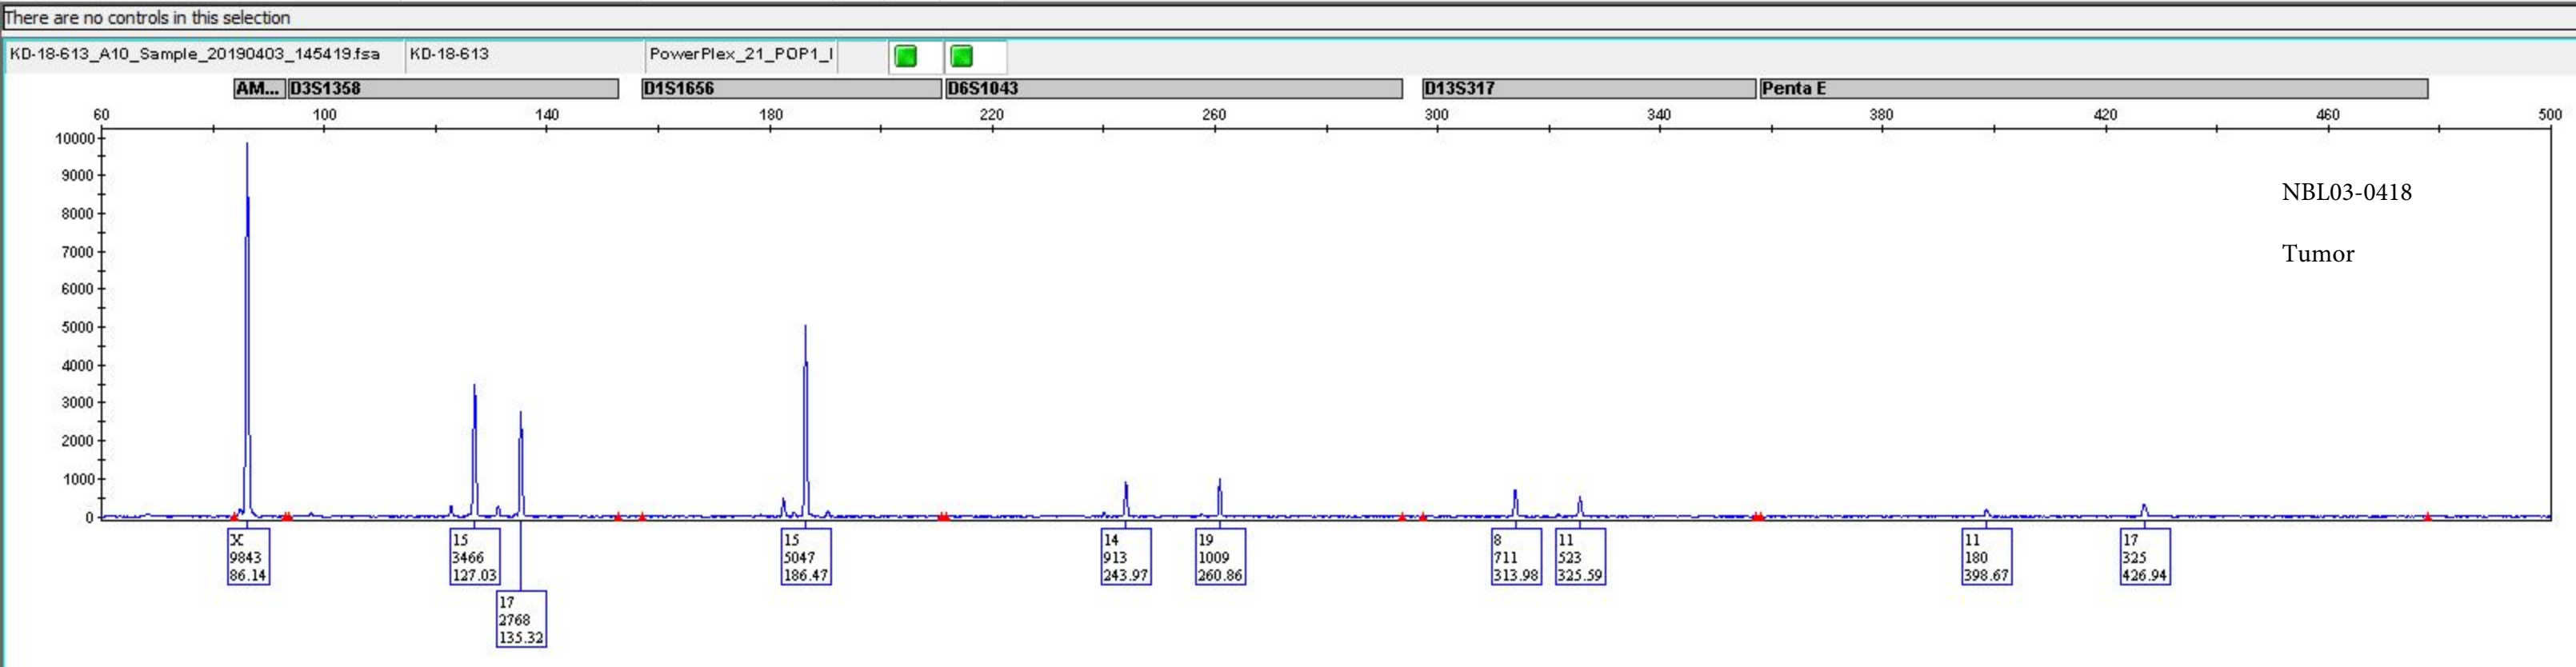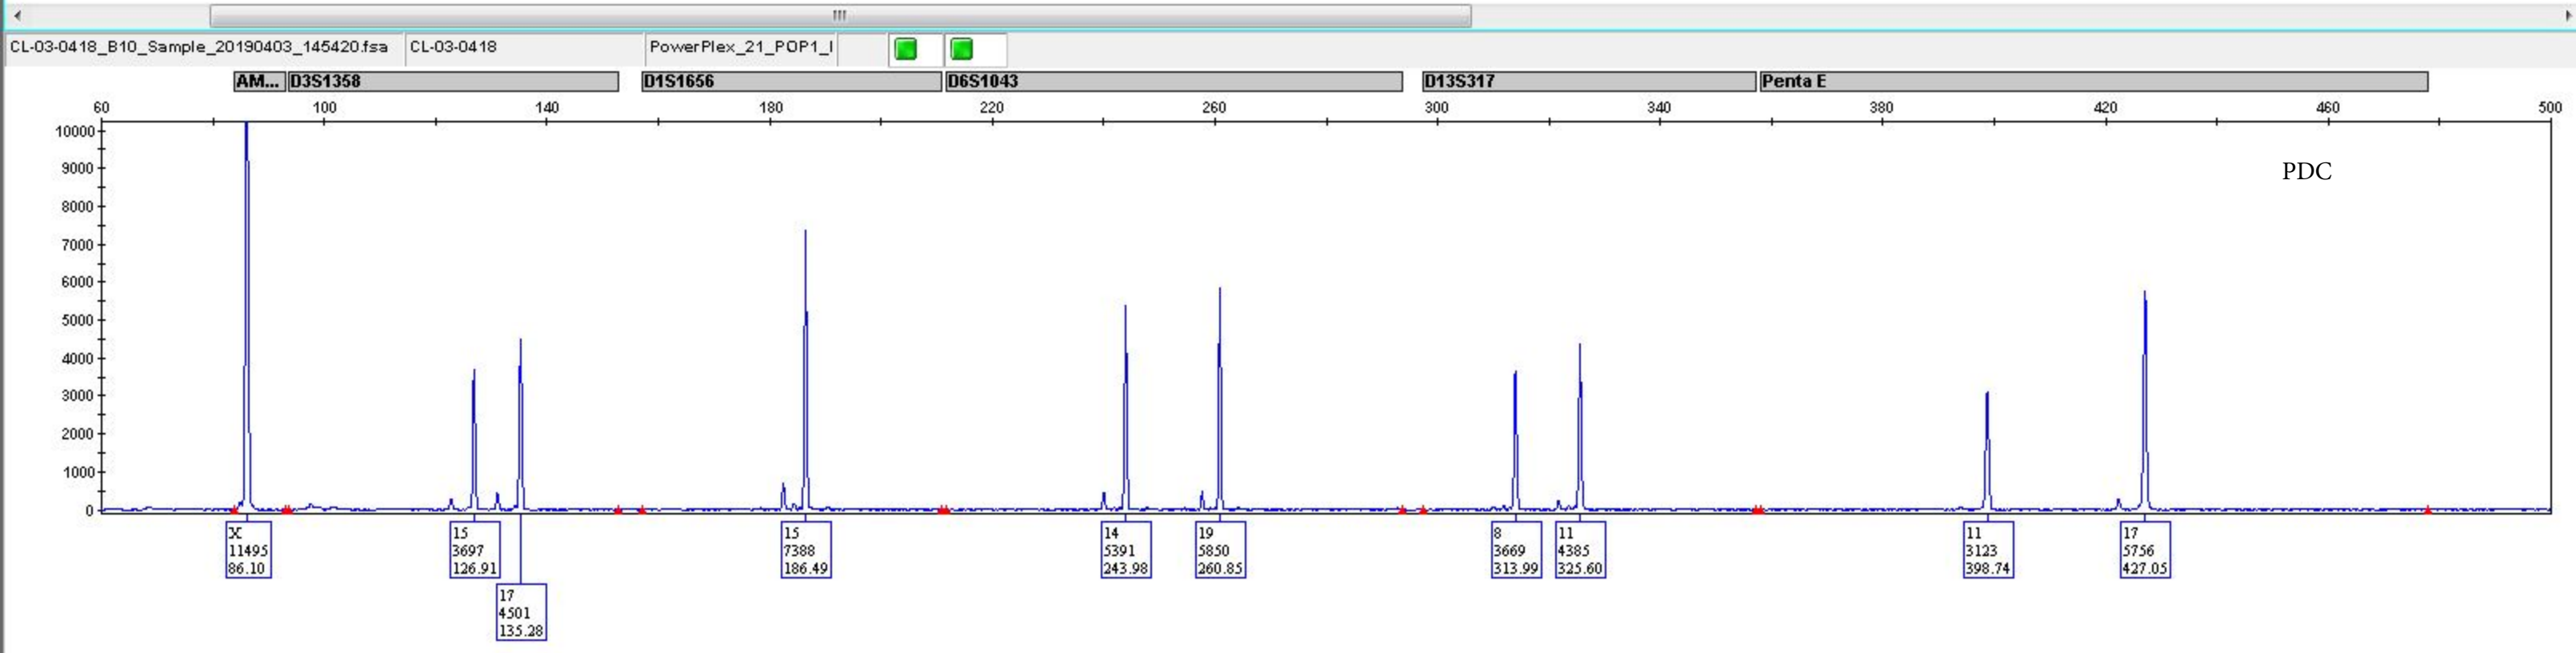

There are no controls in this selection

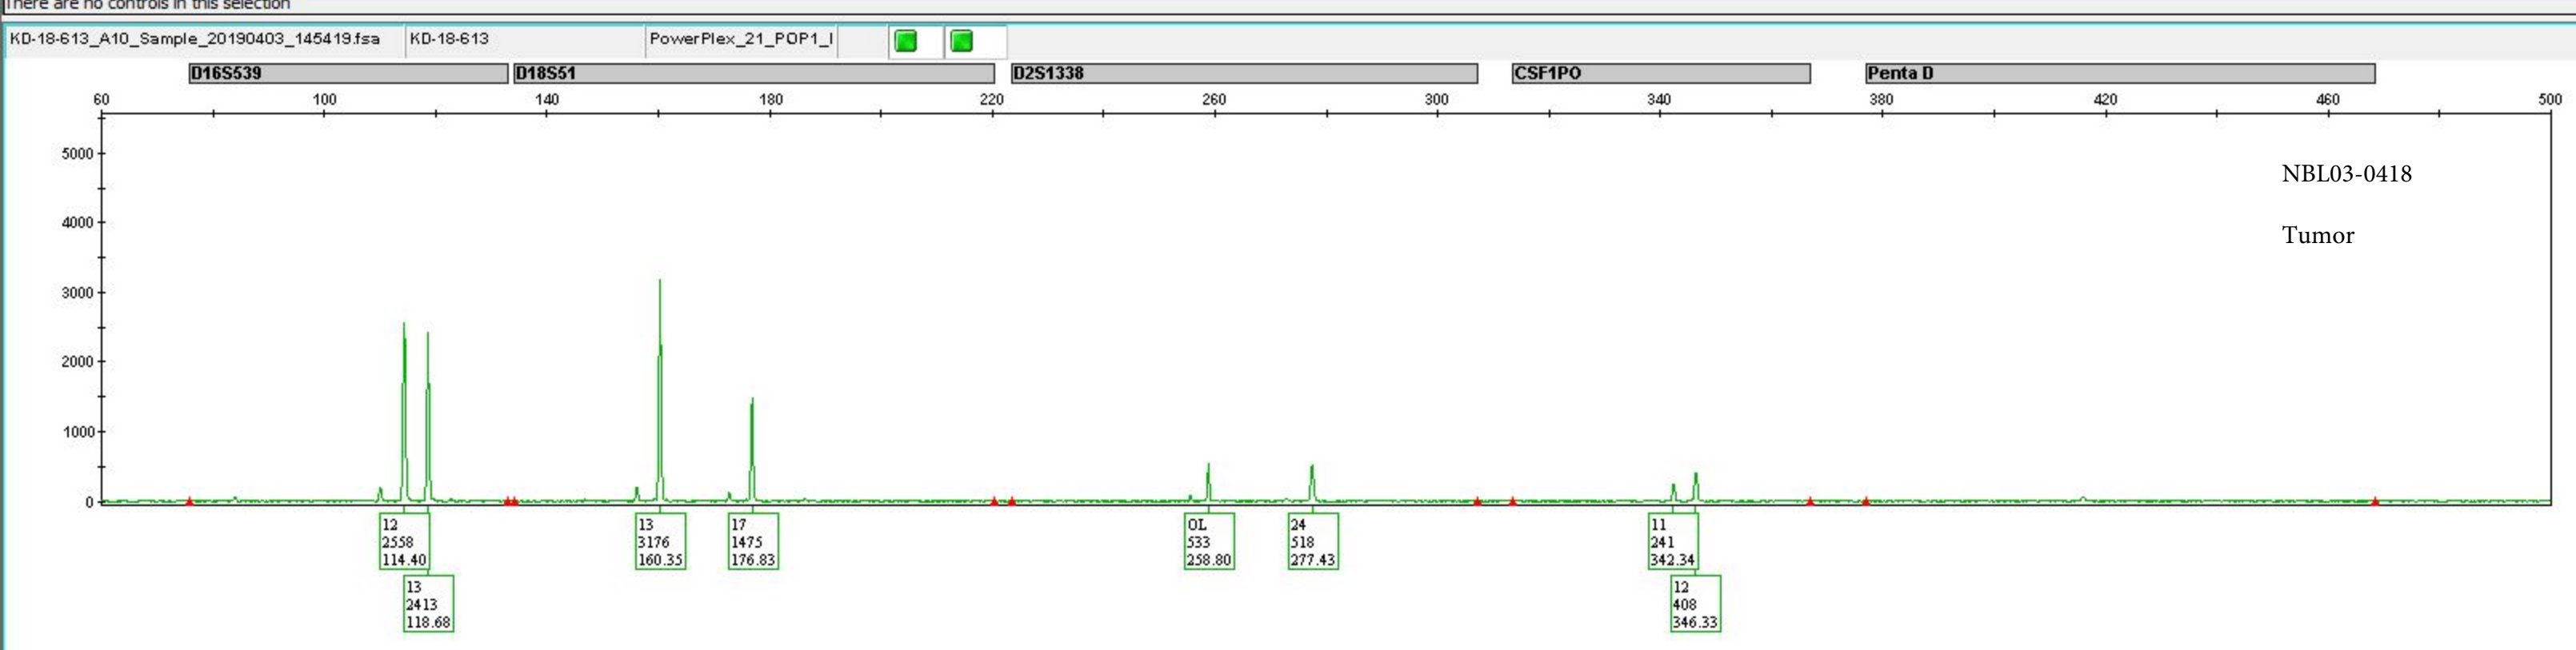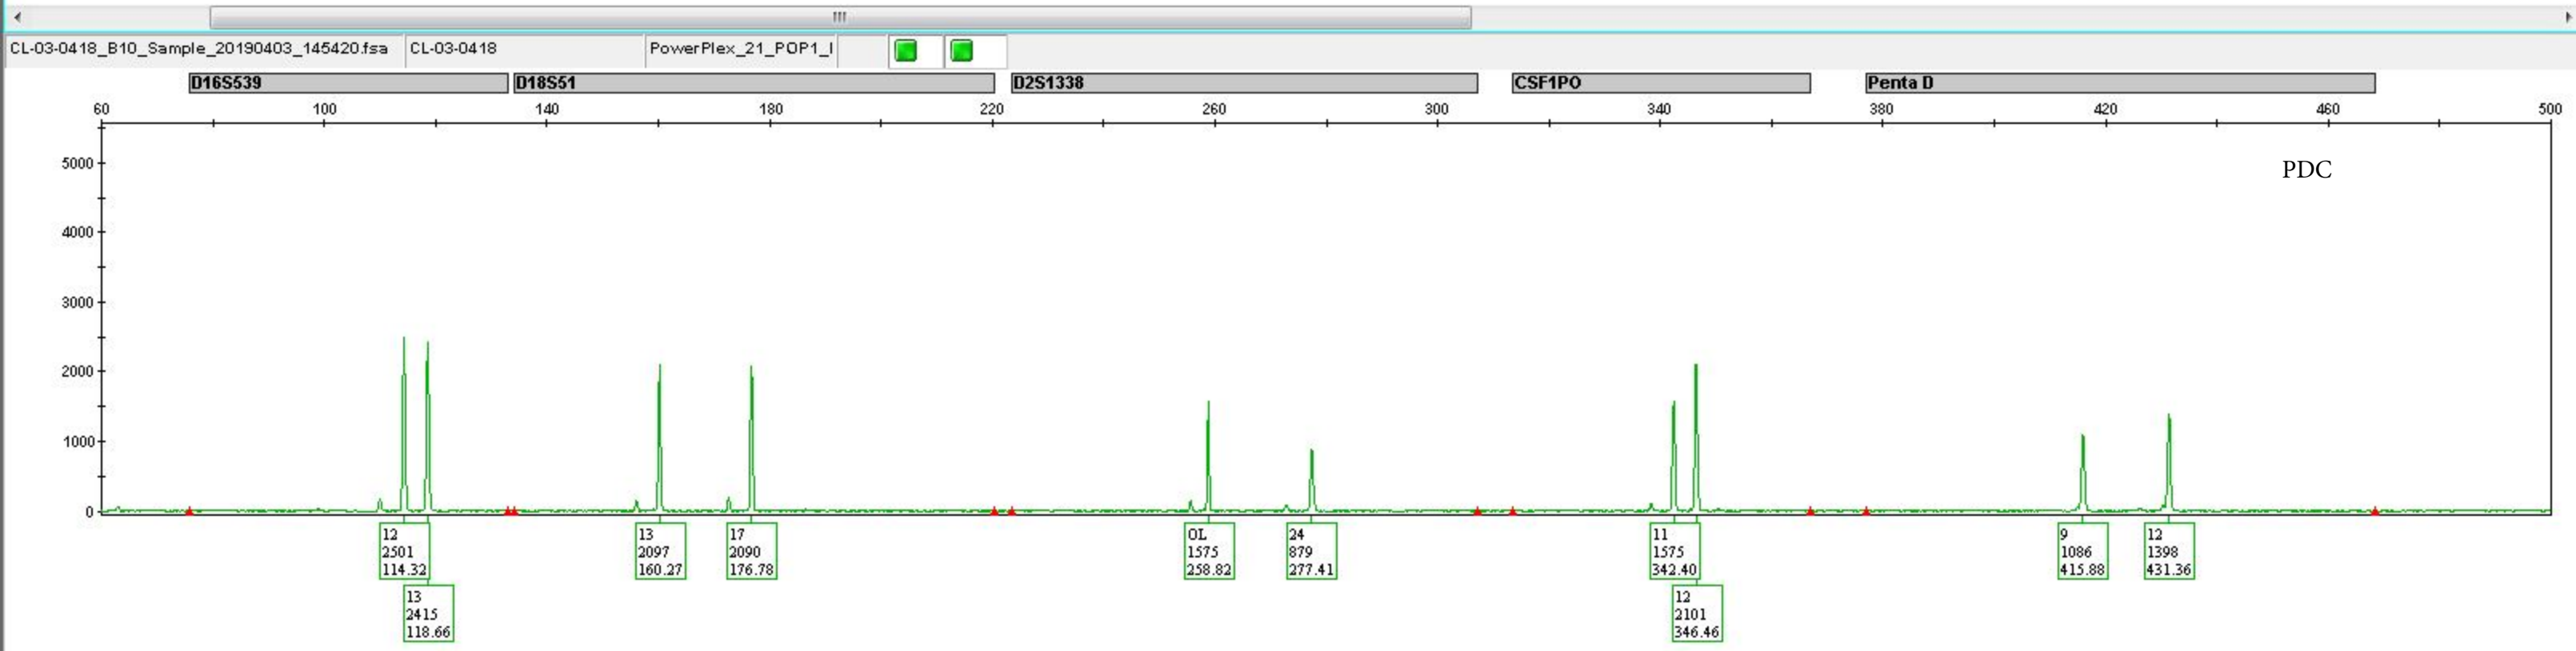

There are no controls in this selection

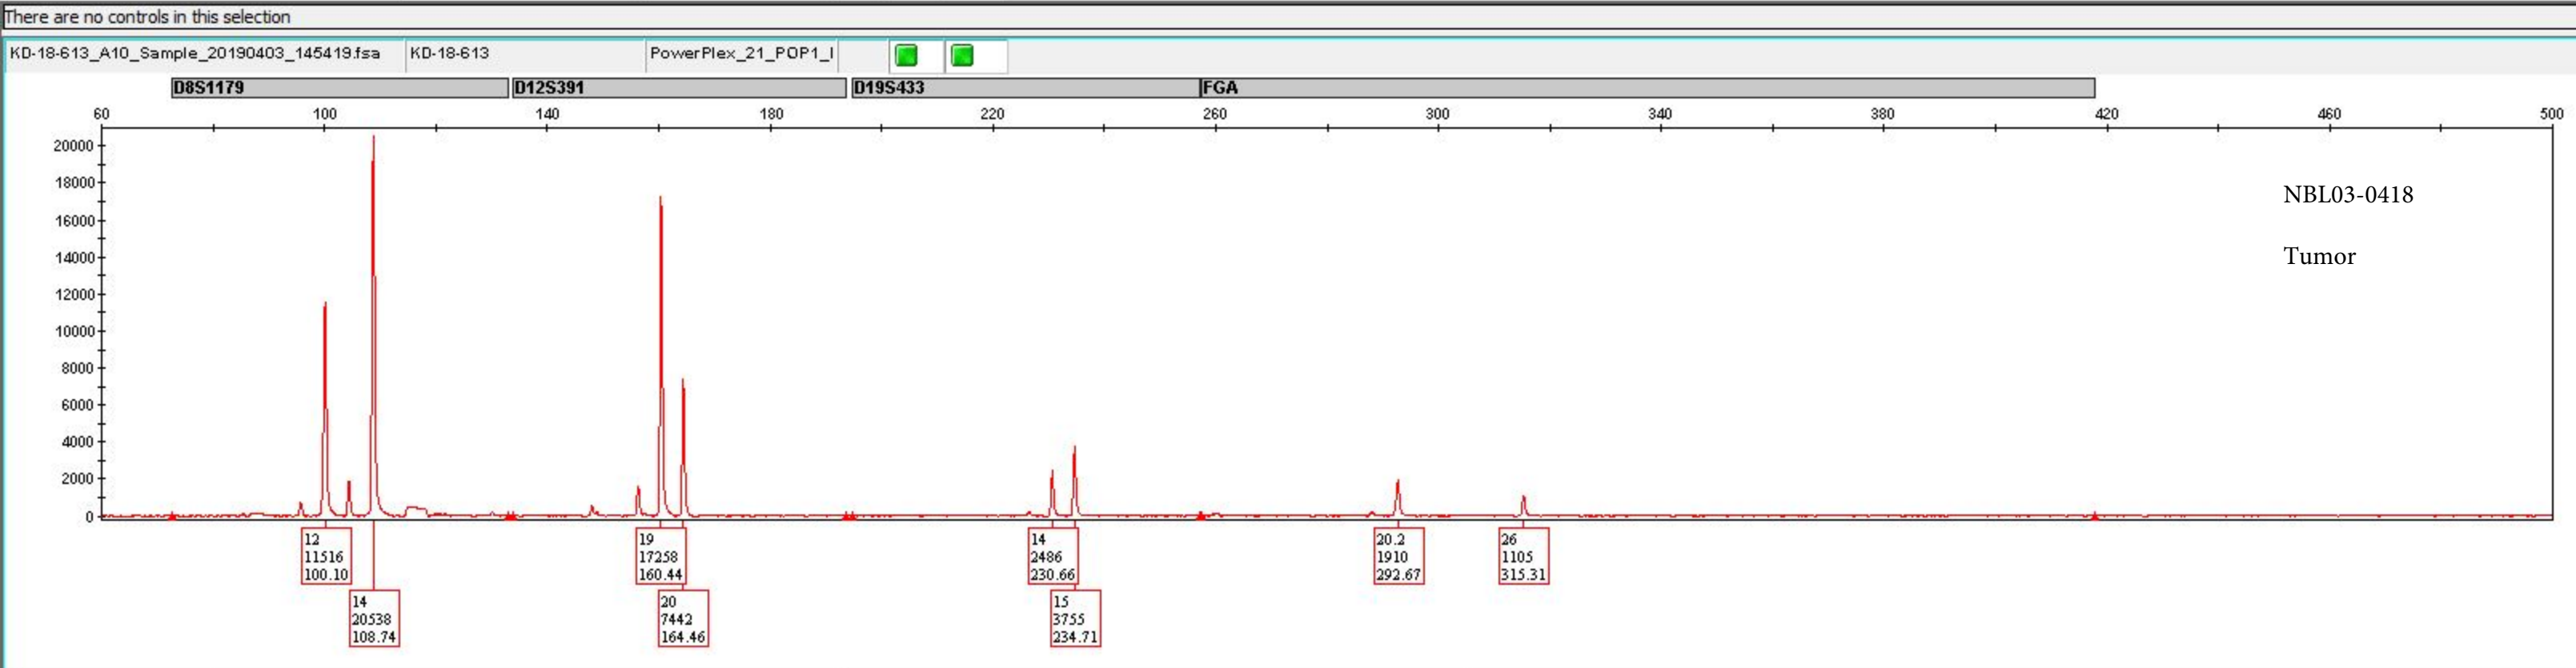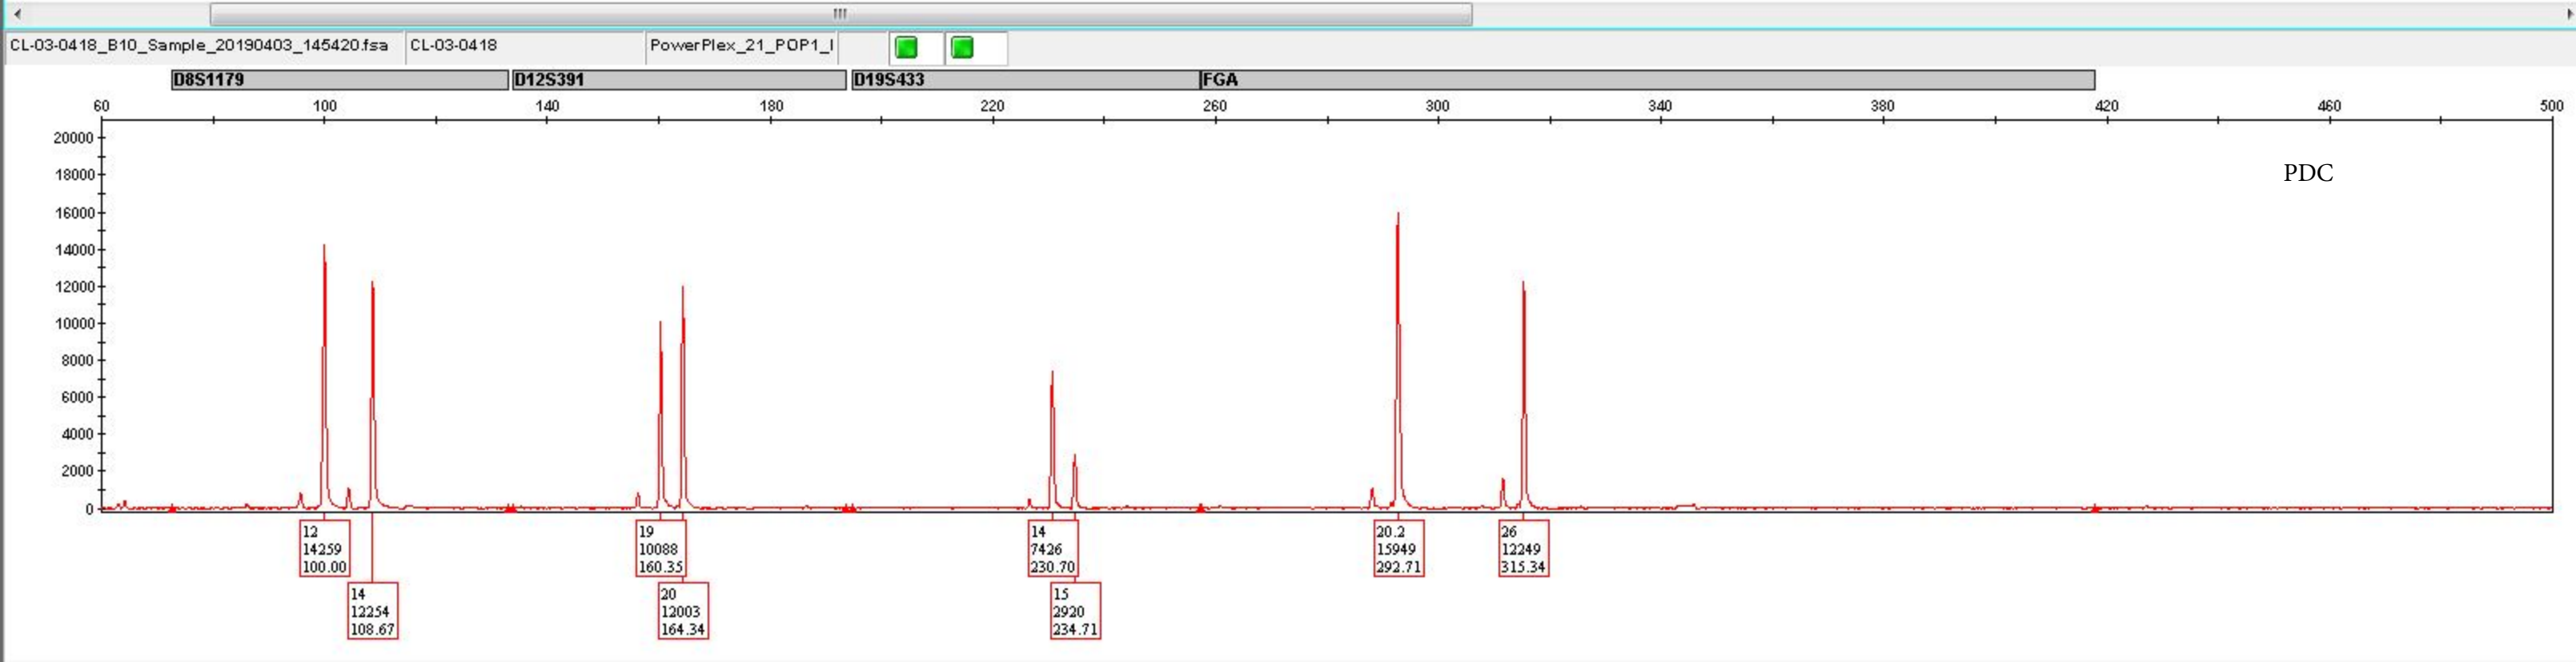

There are no controls in this selection

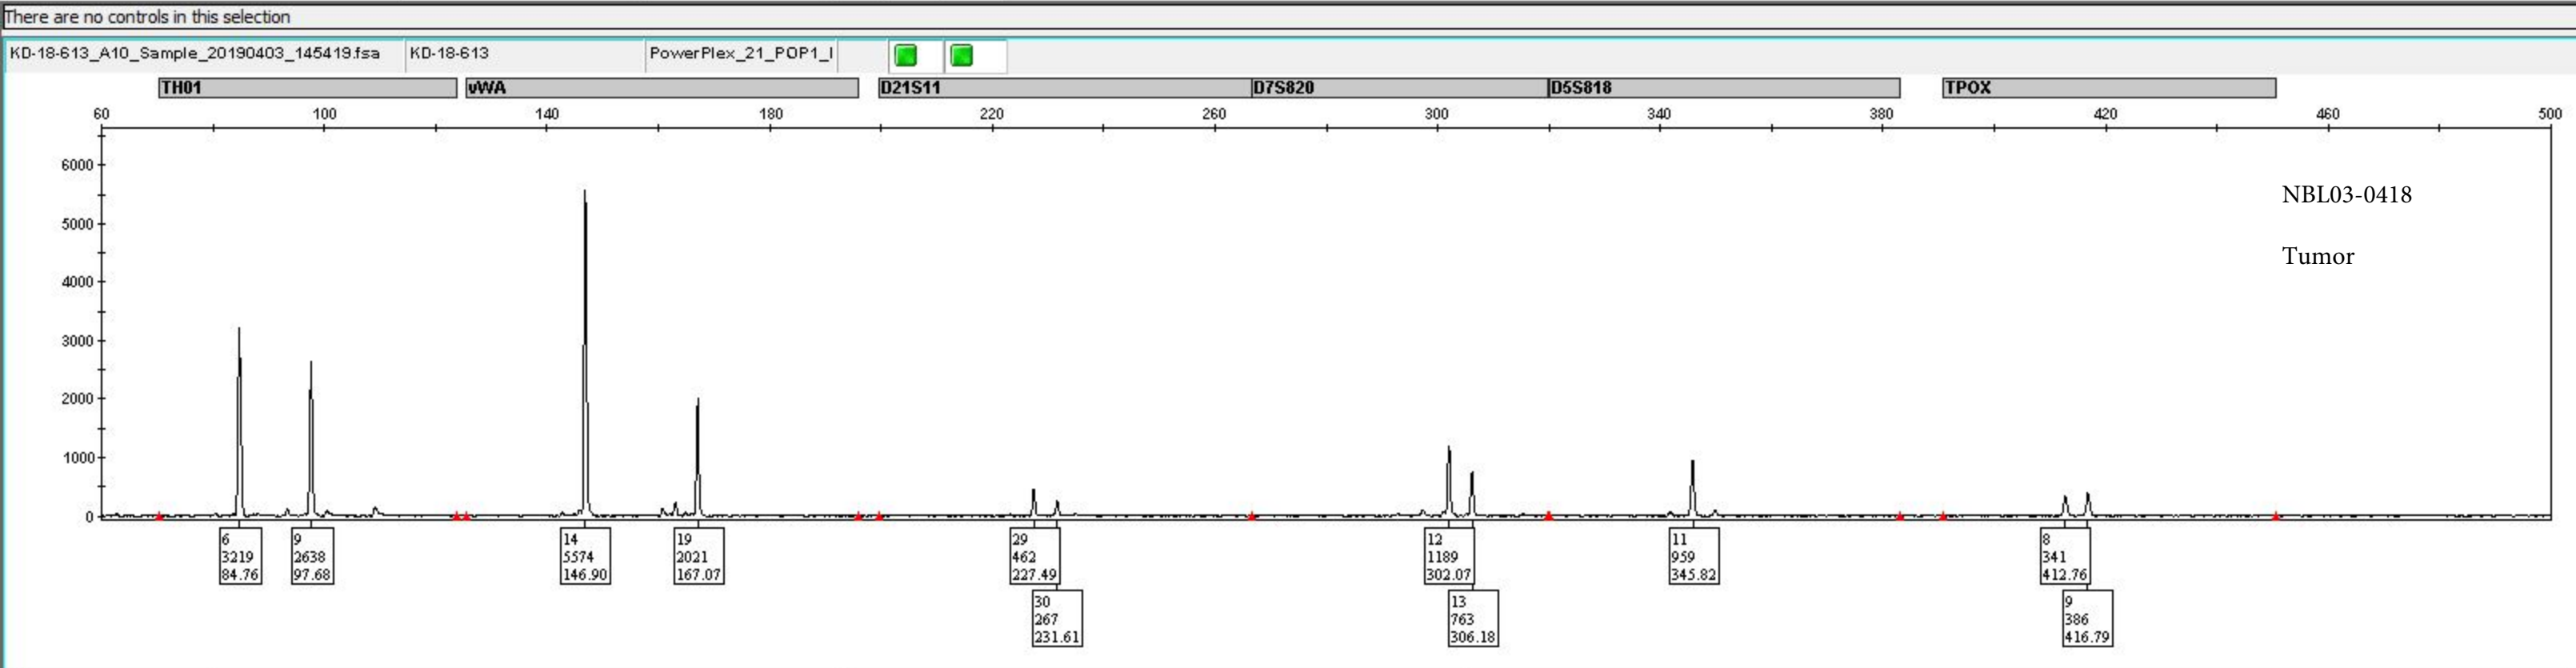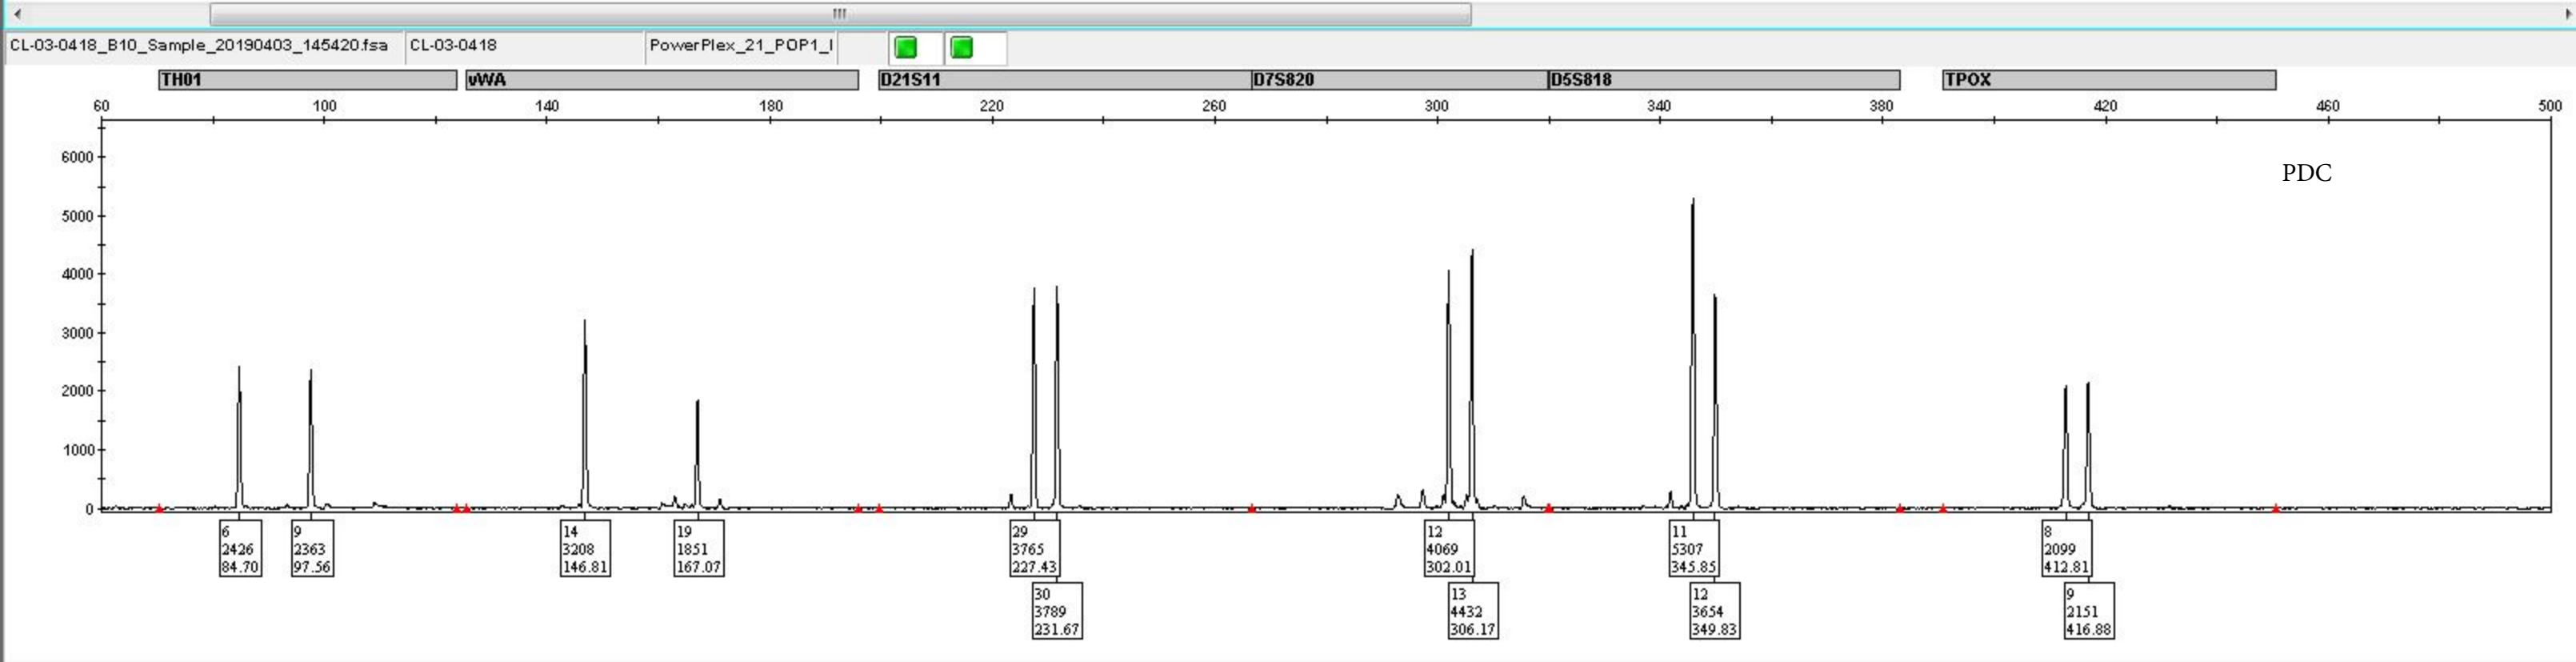



There are no controls in this selection

KD-18-737\_C10\_Sample\_20190403\_145421.fsa KD-18-737 PowerPlex\_21\_POP1\_I

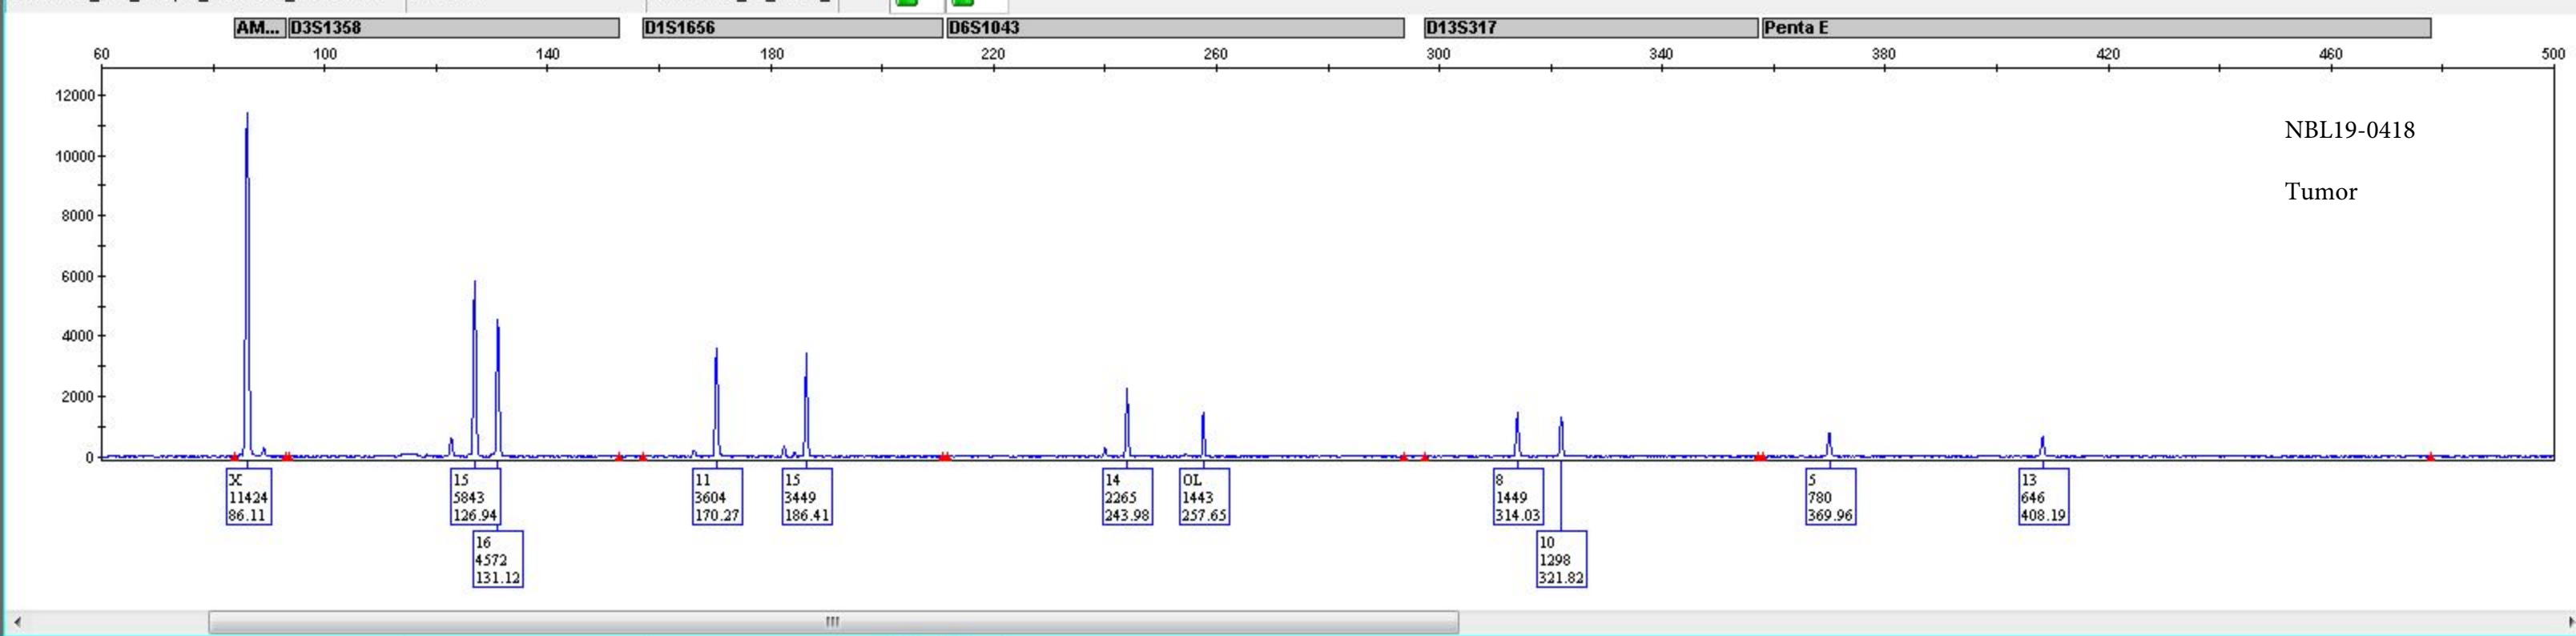

CL-19-0418\_D10\_Sample\_20190403\_145422.fsa CL-19-0418 PowerPlex\_21\_POP1\_I

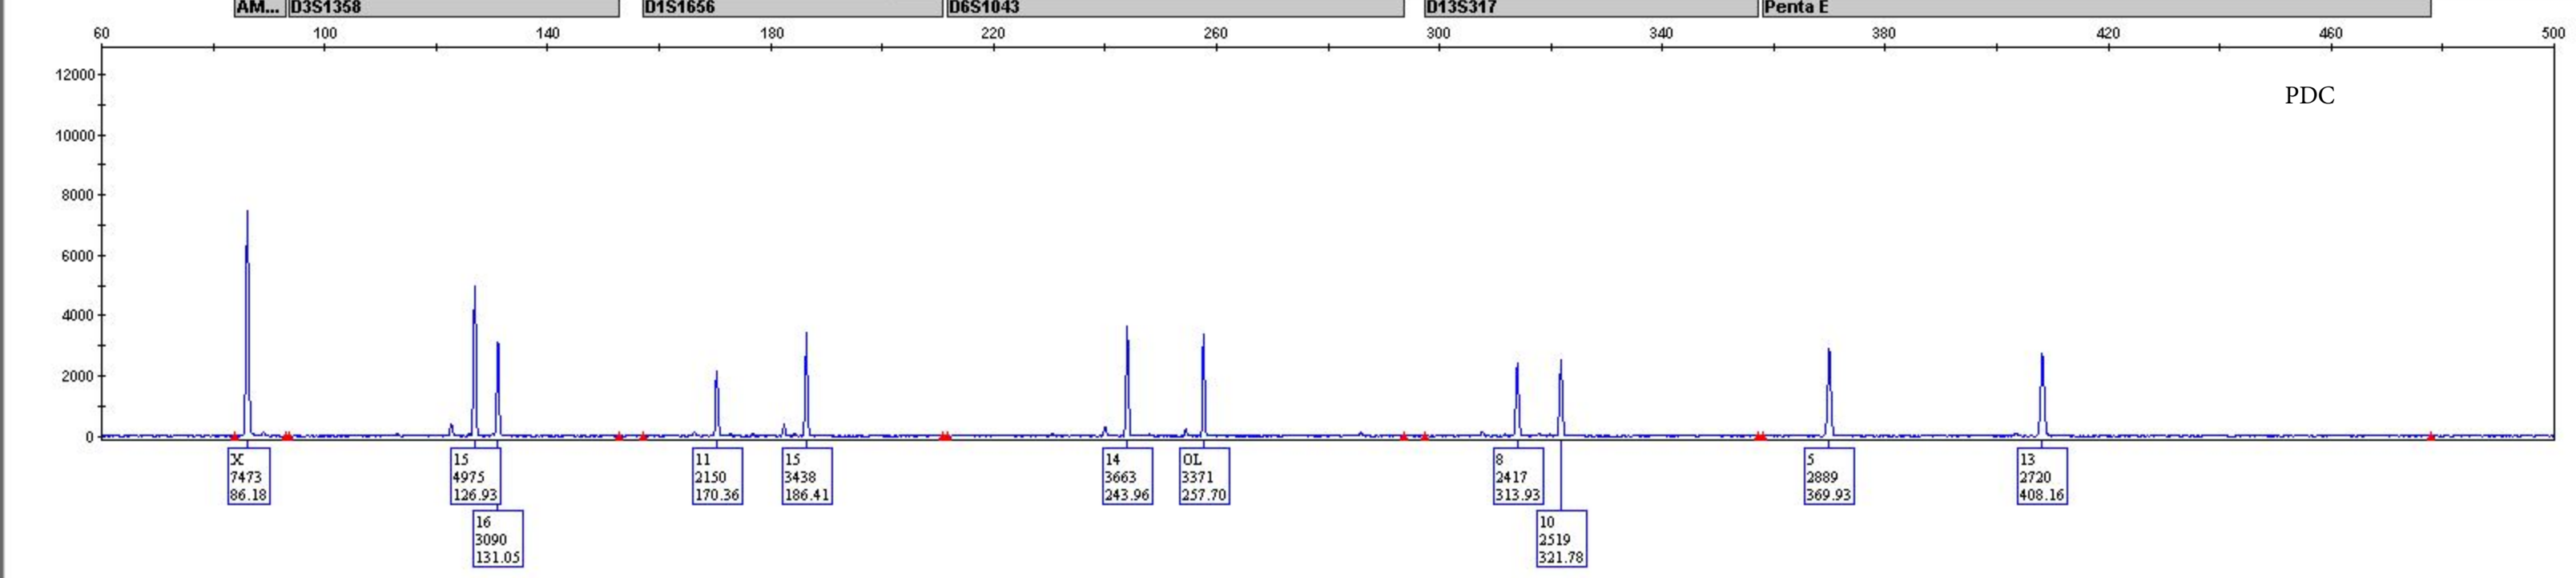

There are no controls in this selection

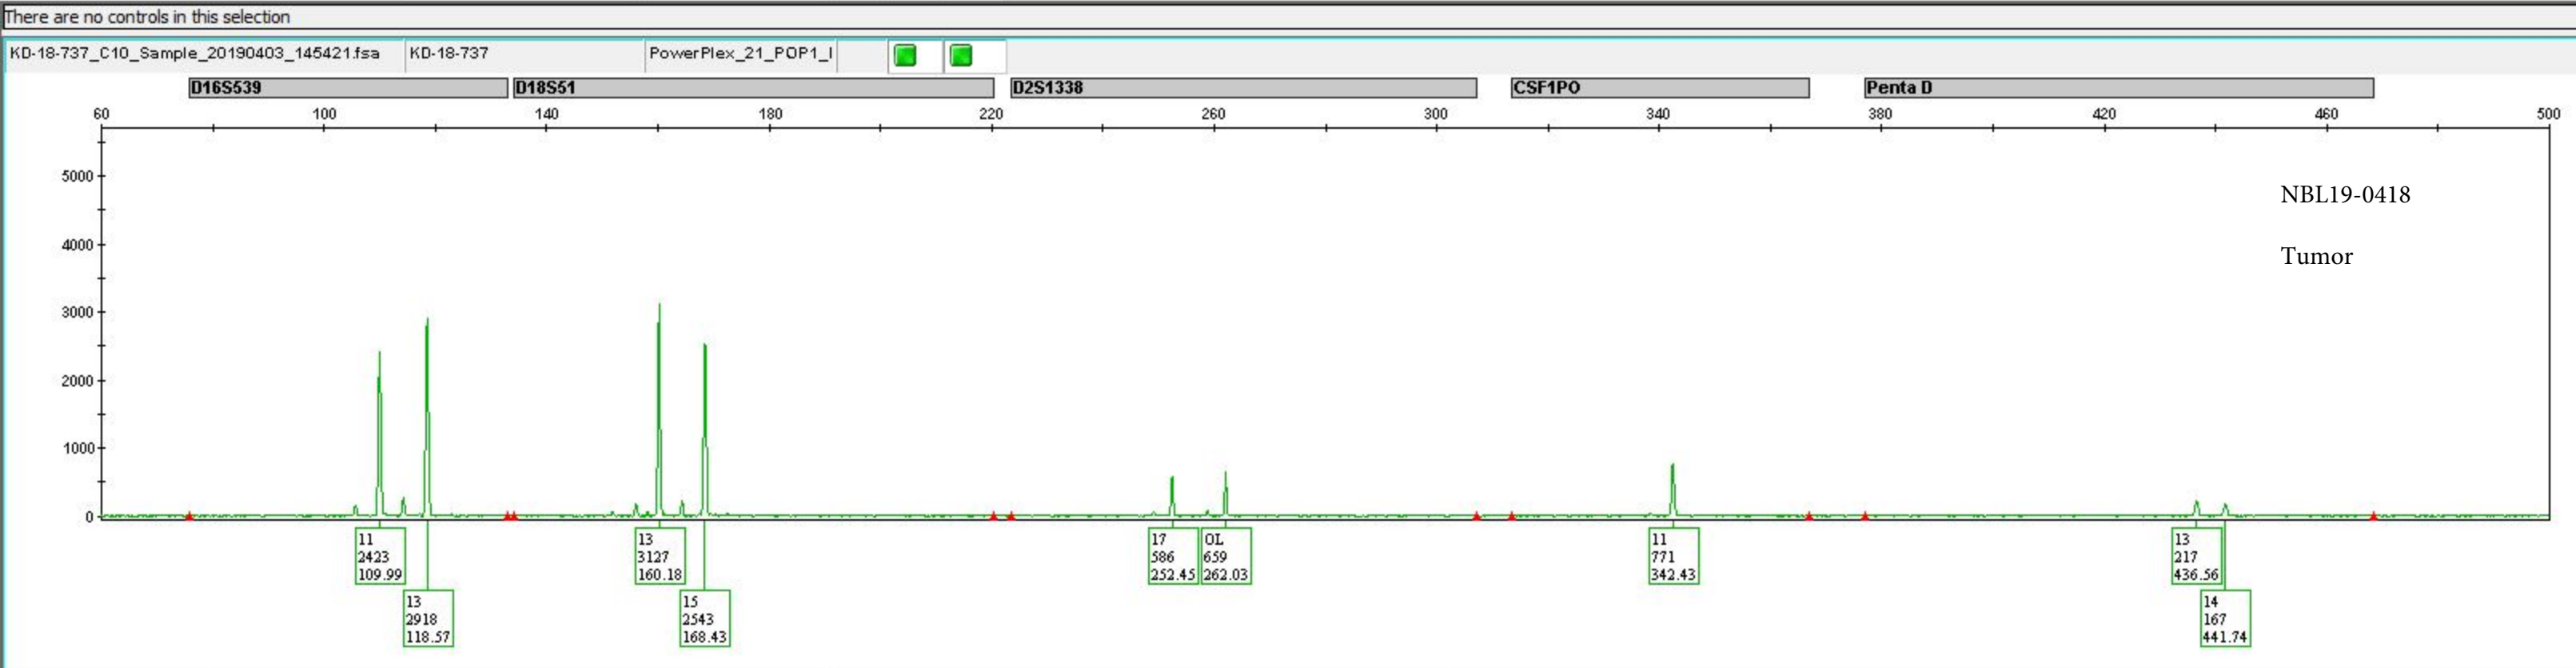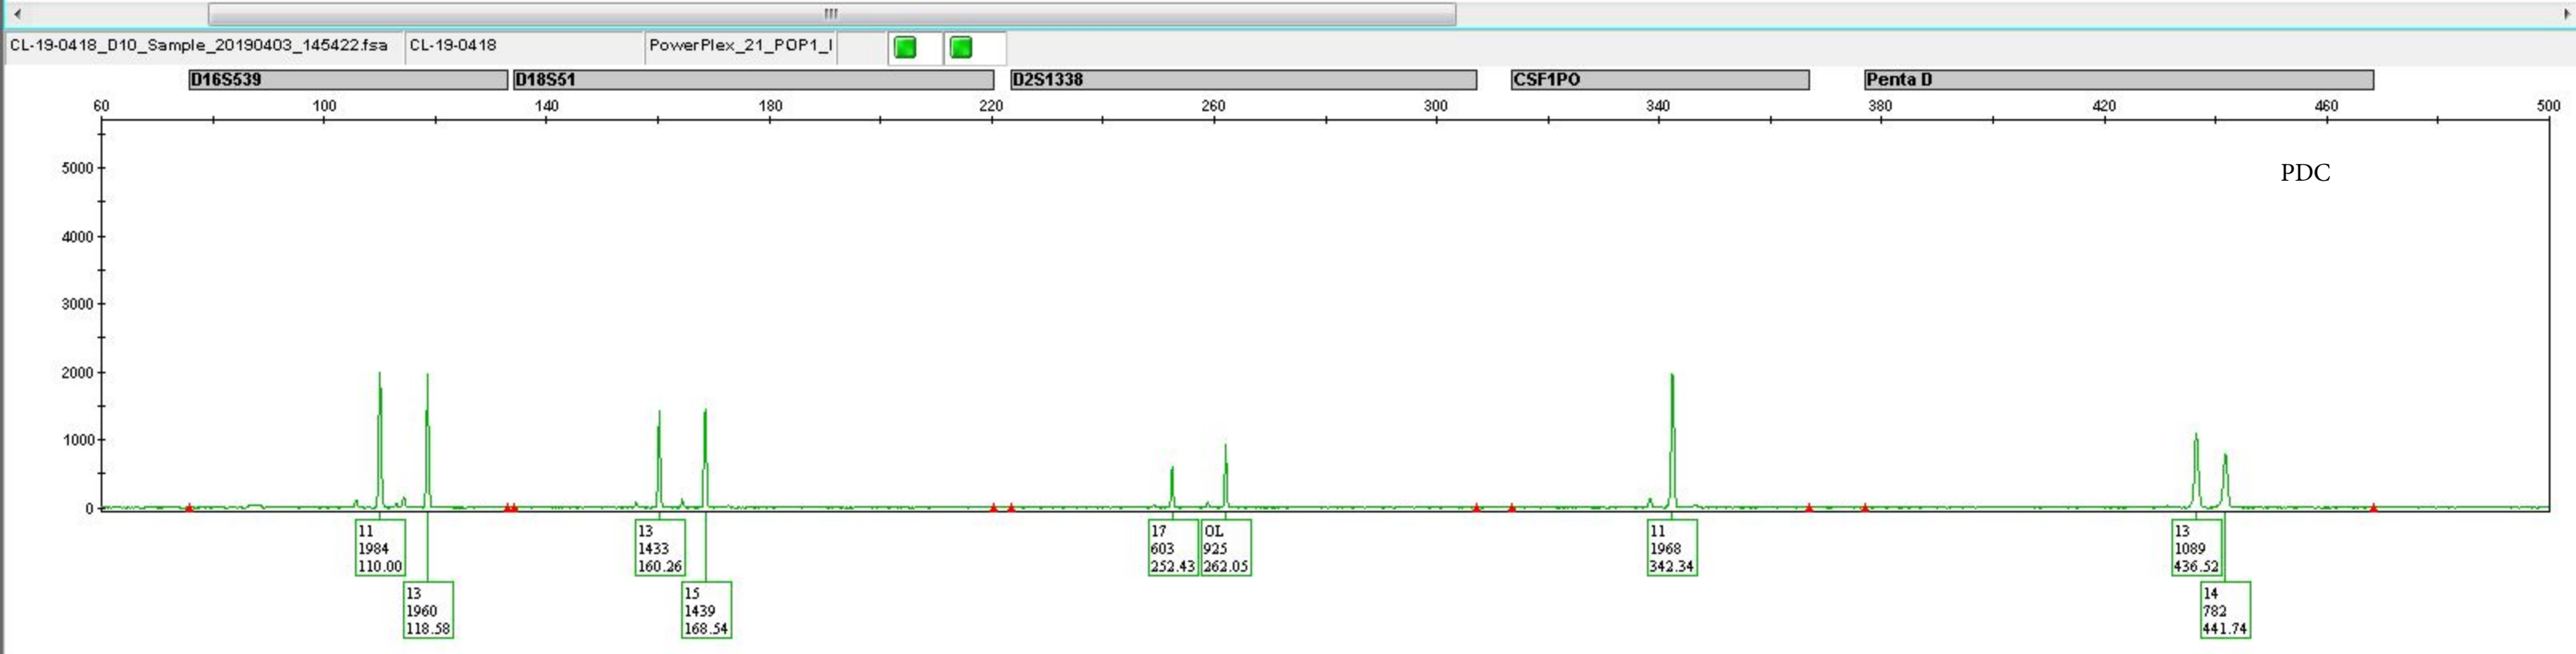

There are no controls in this selection

KD-18-737\_C10\_Sample\_20190403\_145421.fsa KD-18-737 PowerPlex\_21\_POP1\_I

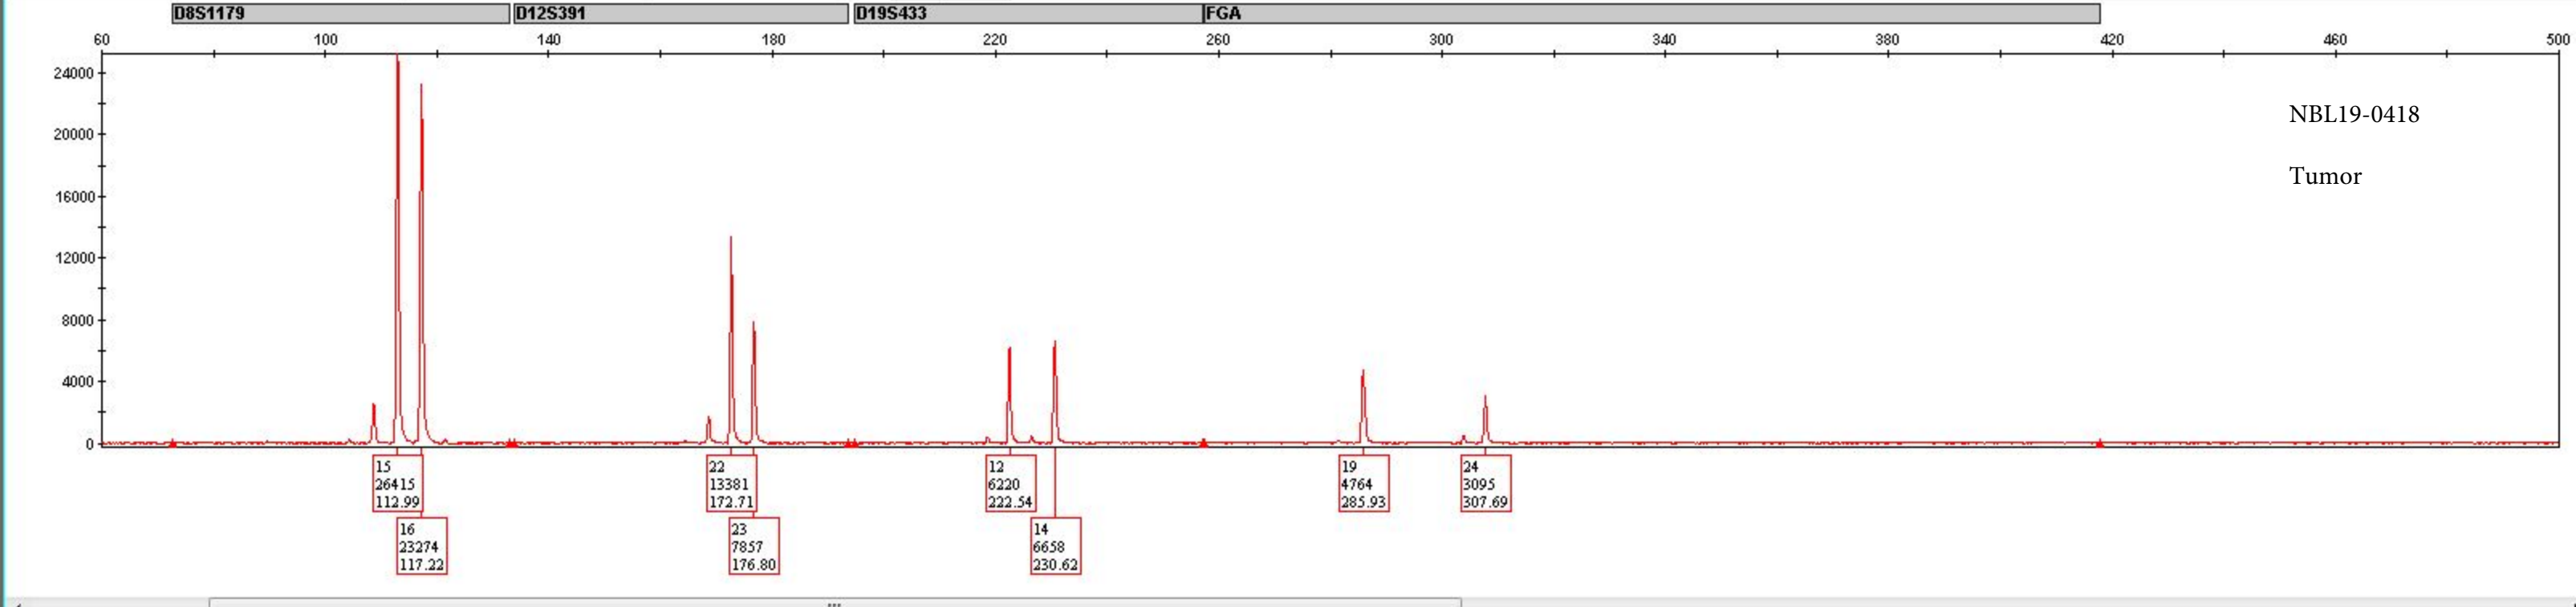

CL-19-0418\_D10\_Sample\_20190403\_145422.fsa CL-19-0418 PowerPlex\_21\_POP1\_I

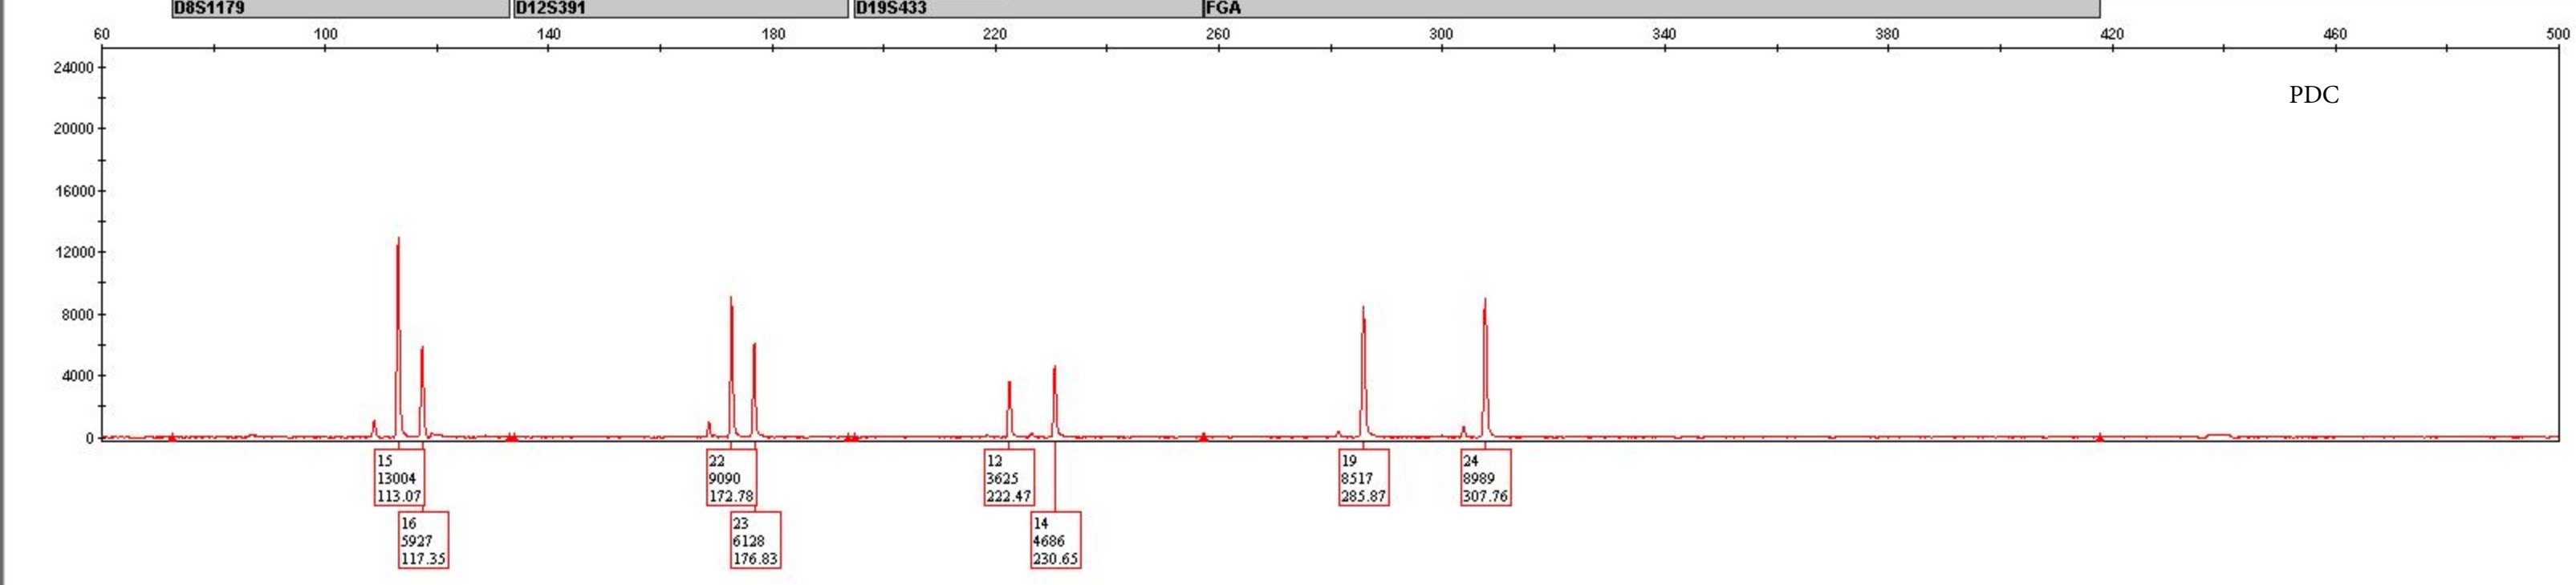

There are no controls in this selection

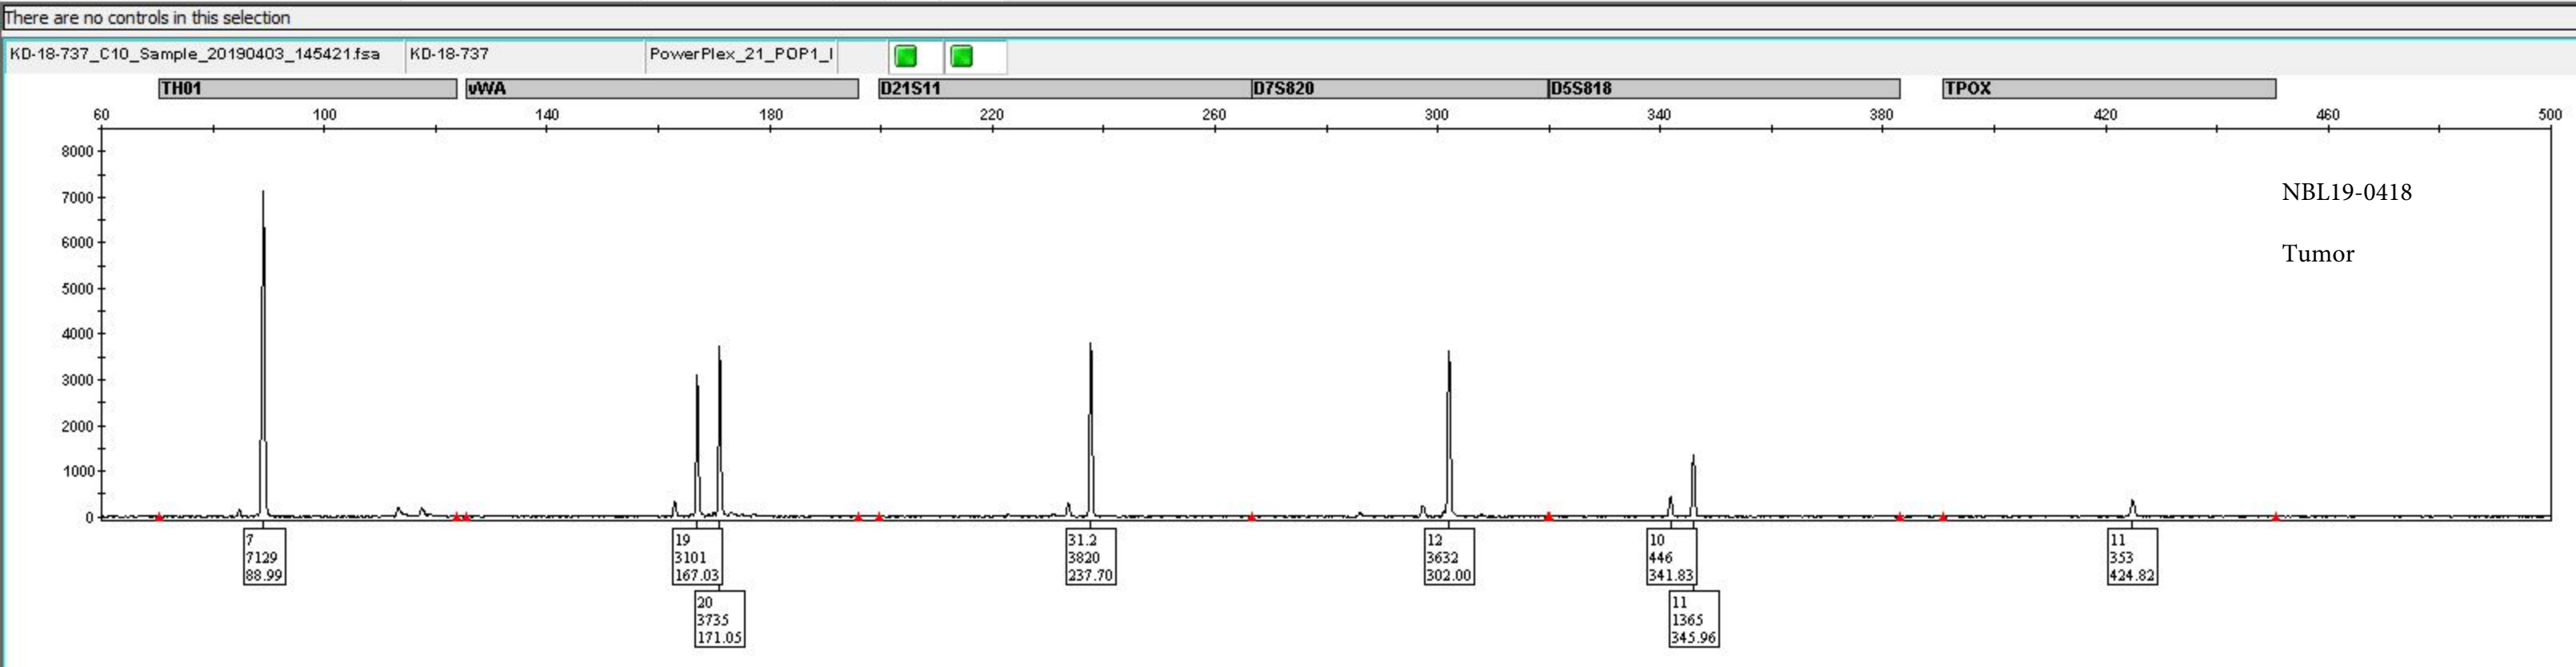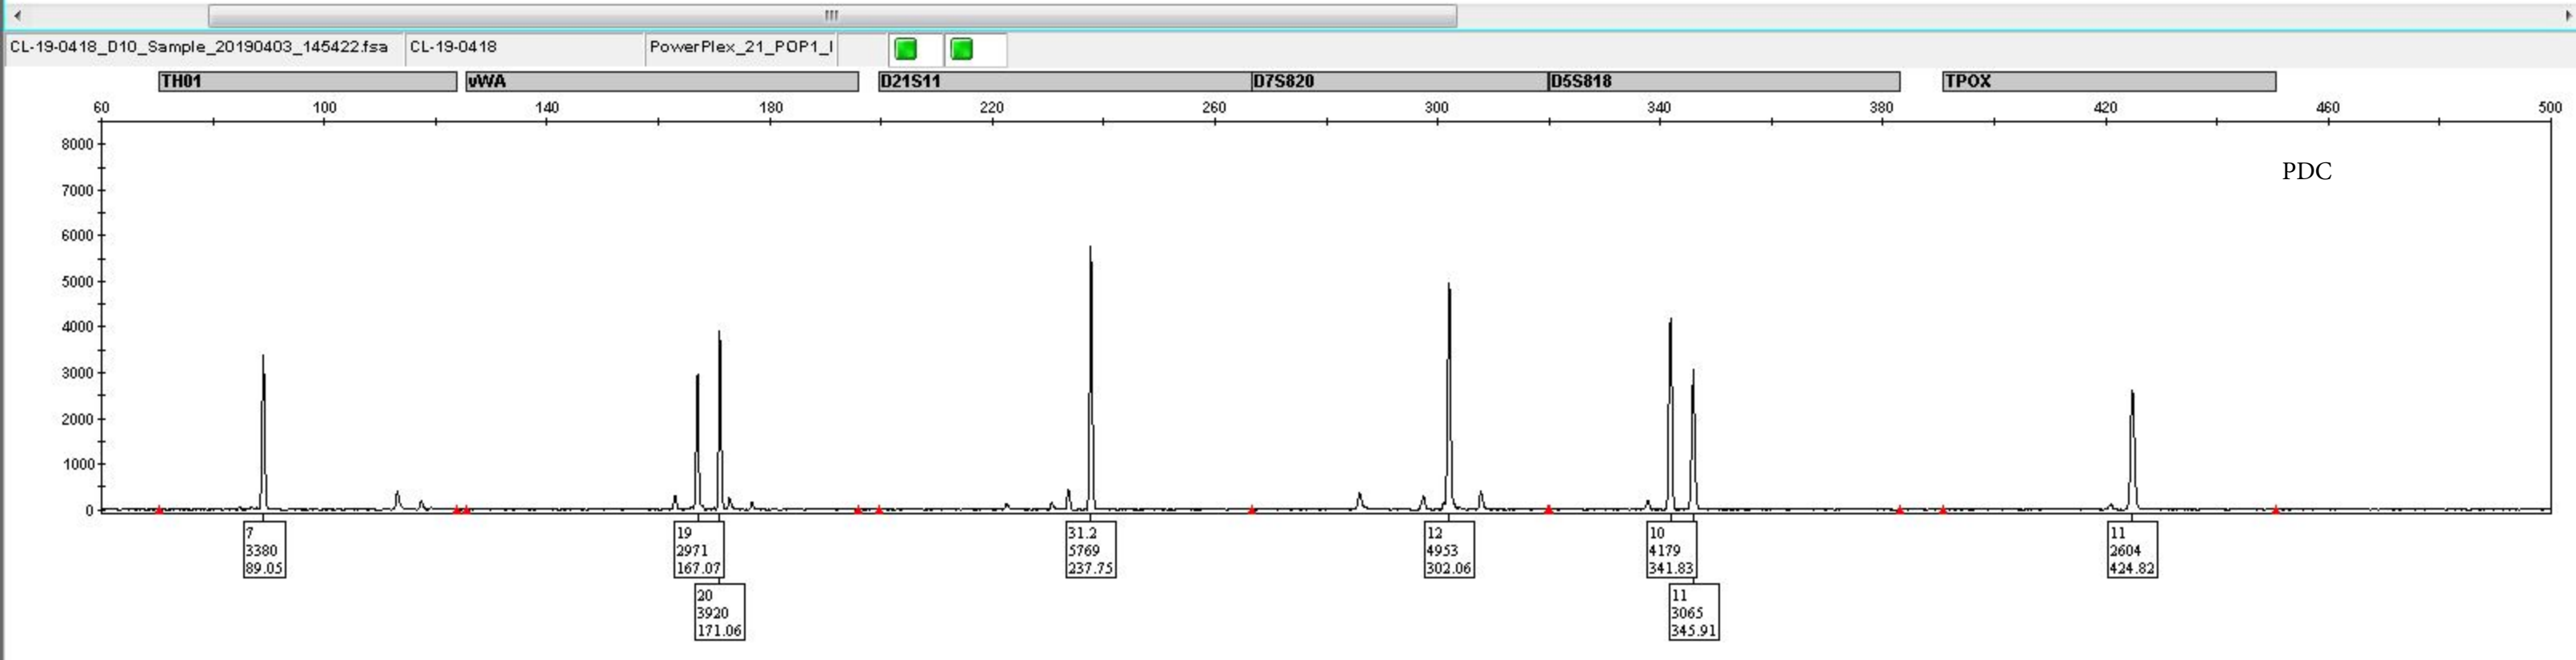

There are no controls in this selection

KD-18-760\_E10\_Sample\_20190403\_153726.fsa KD-18-760 PowerPlex\_21\_POP1\_I

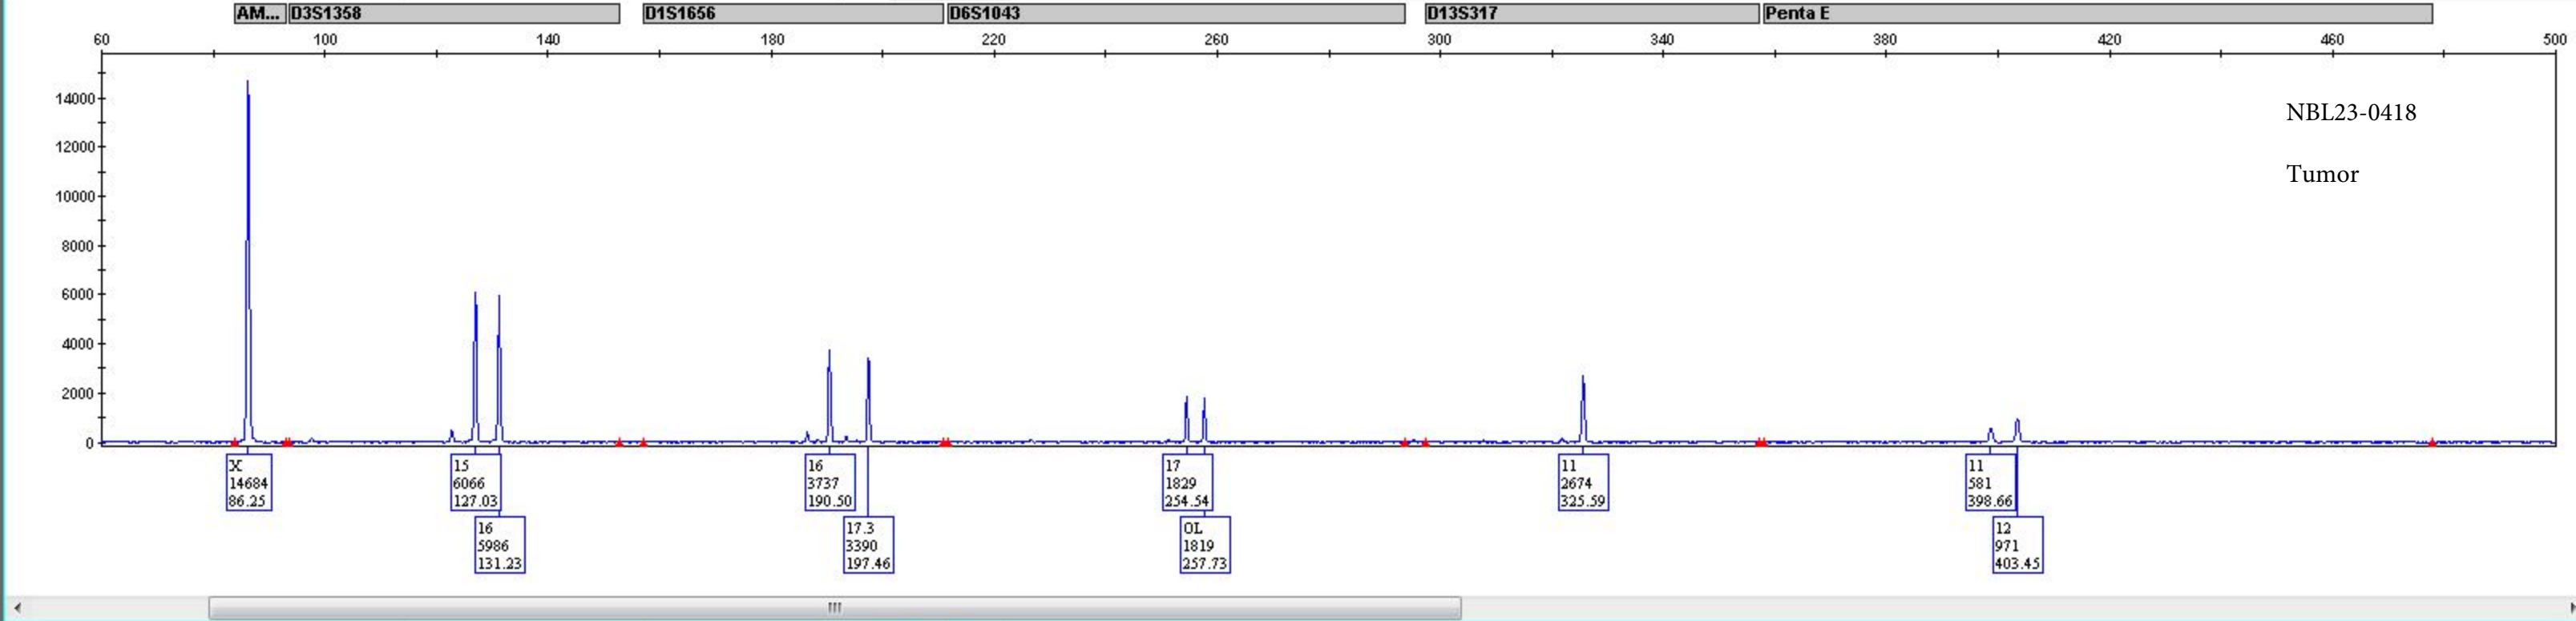

CL-23-0418\_F10\_Sample\_20190403\_153727.fsa CL-23-0418 PowerPlex\_21\_POP1\_I

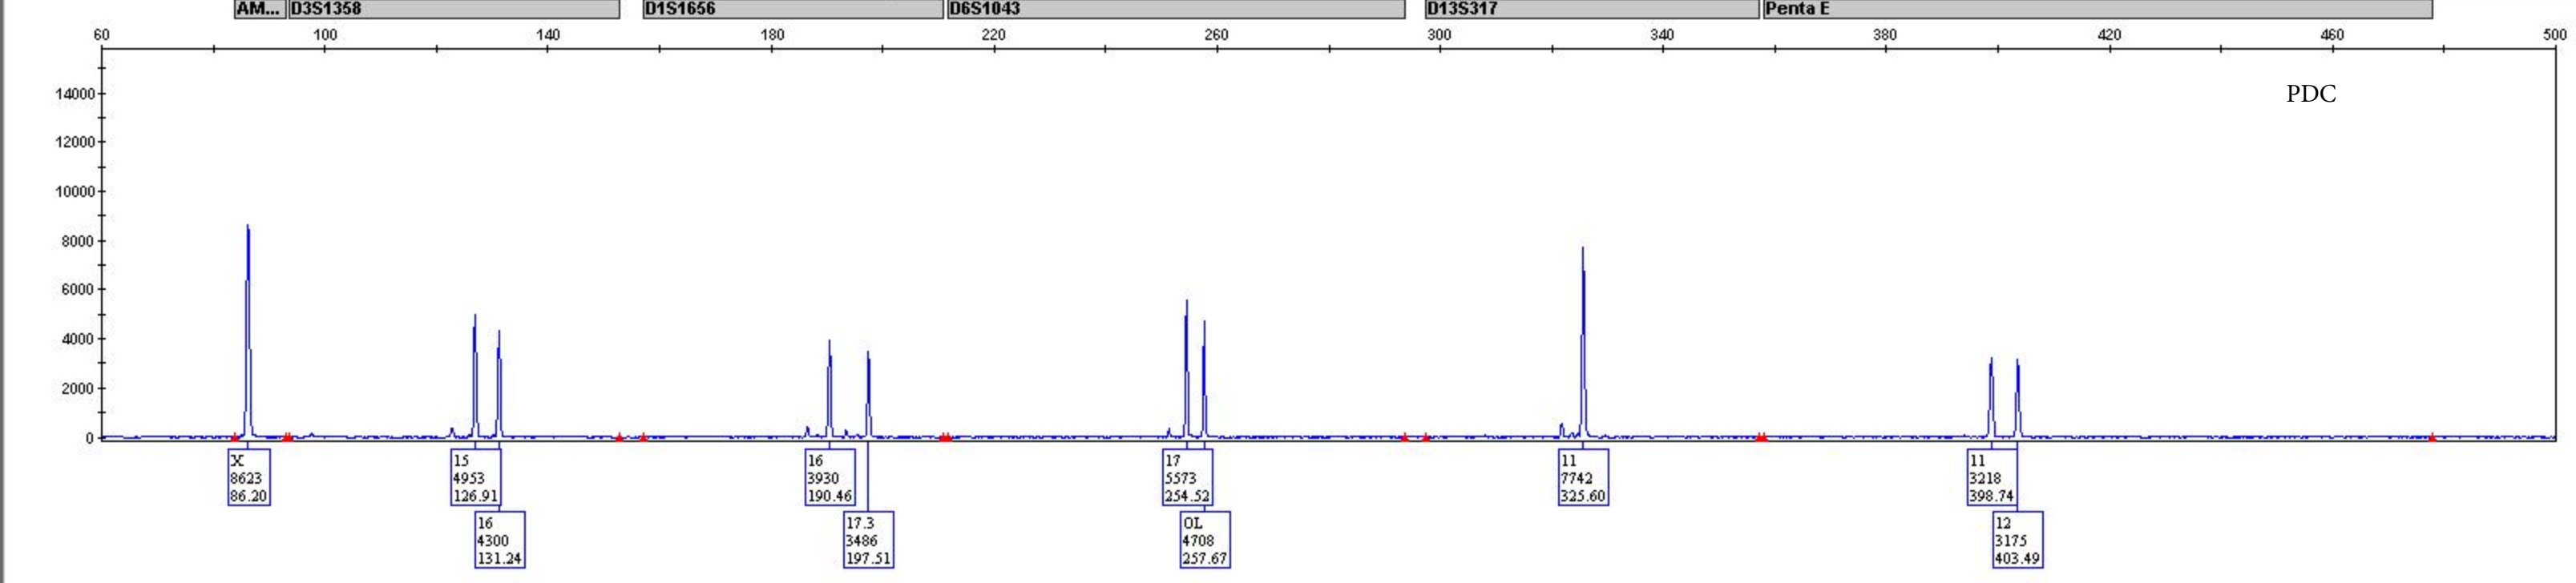

There are no controls in this selection

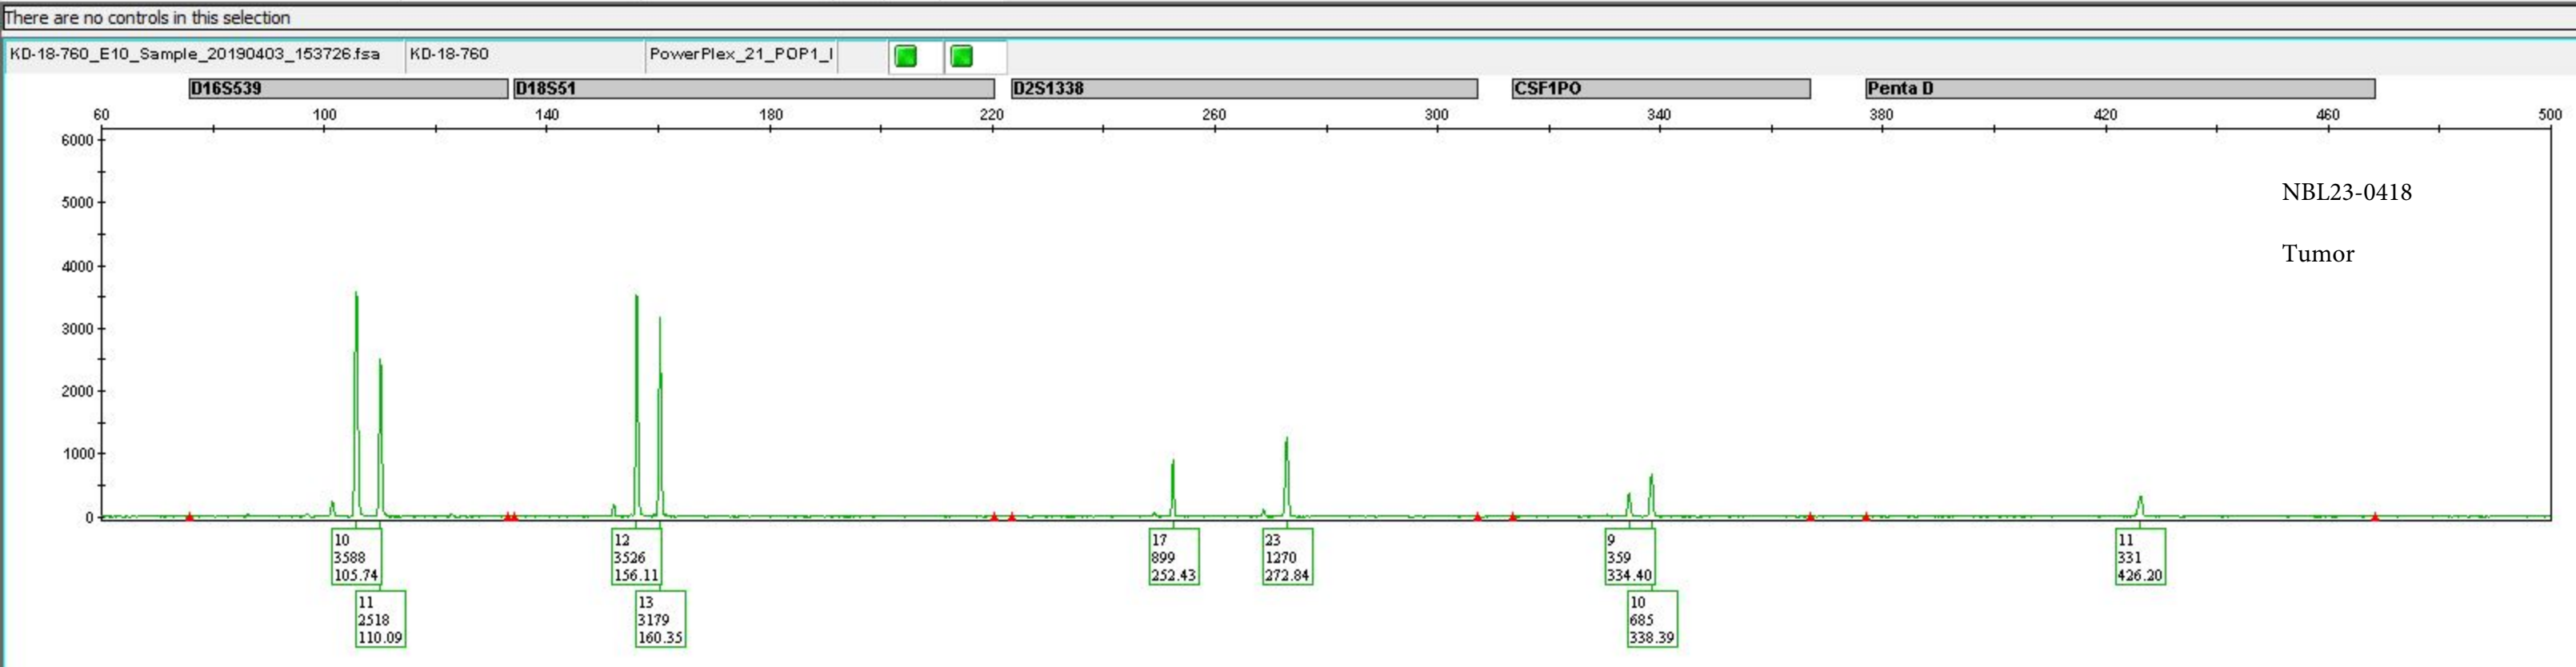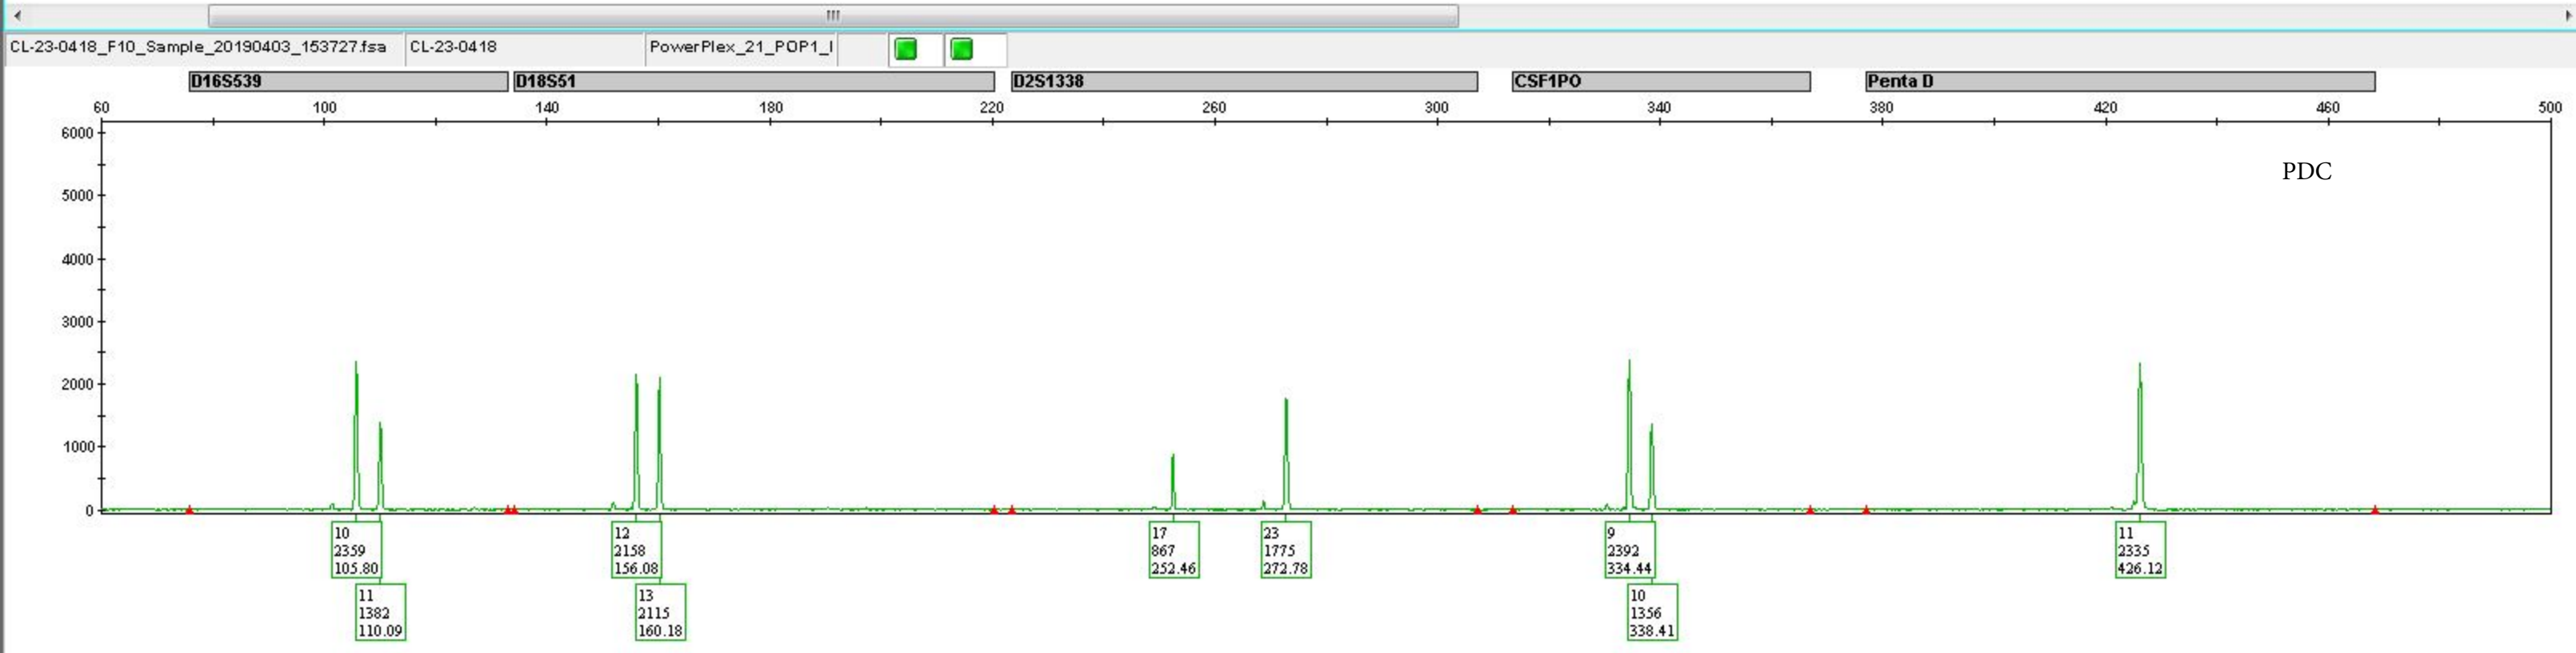

There are no controls in this selection

KD-18-760\_E10\_Sample\_20190403\_153726.fsa KD-18-760 PowerPlex\_21\_POP1\_I

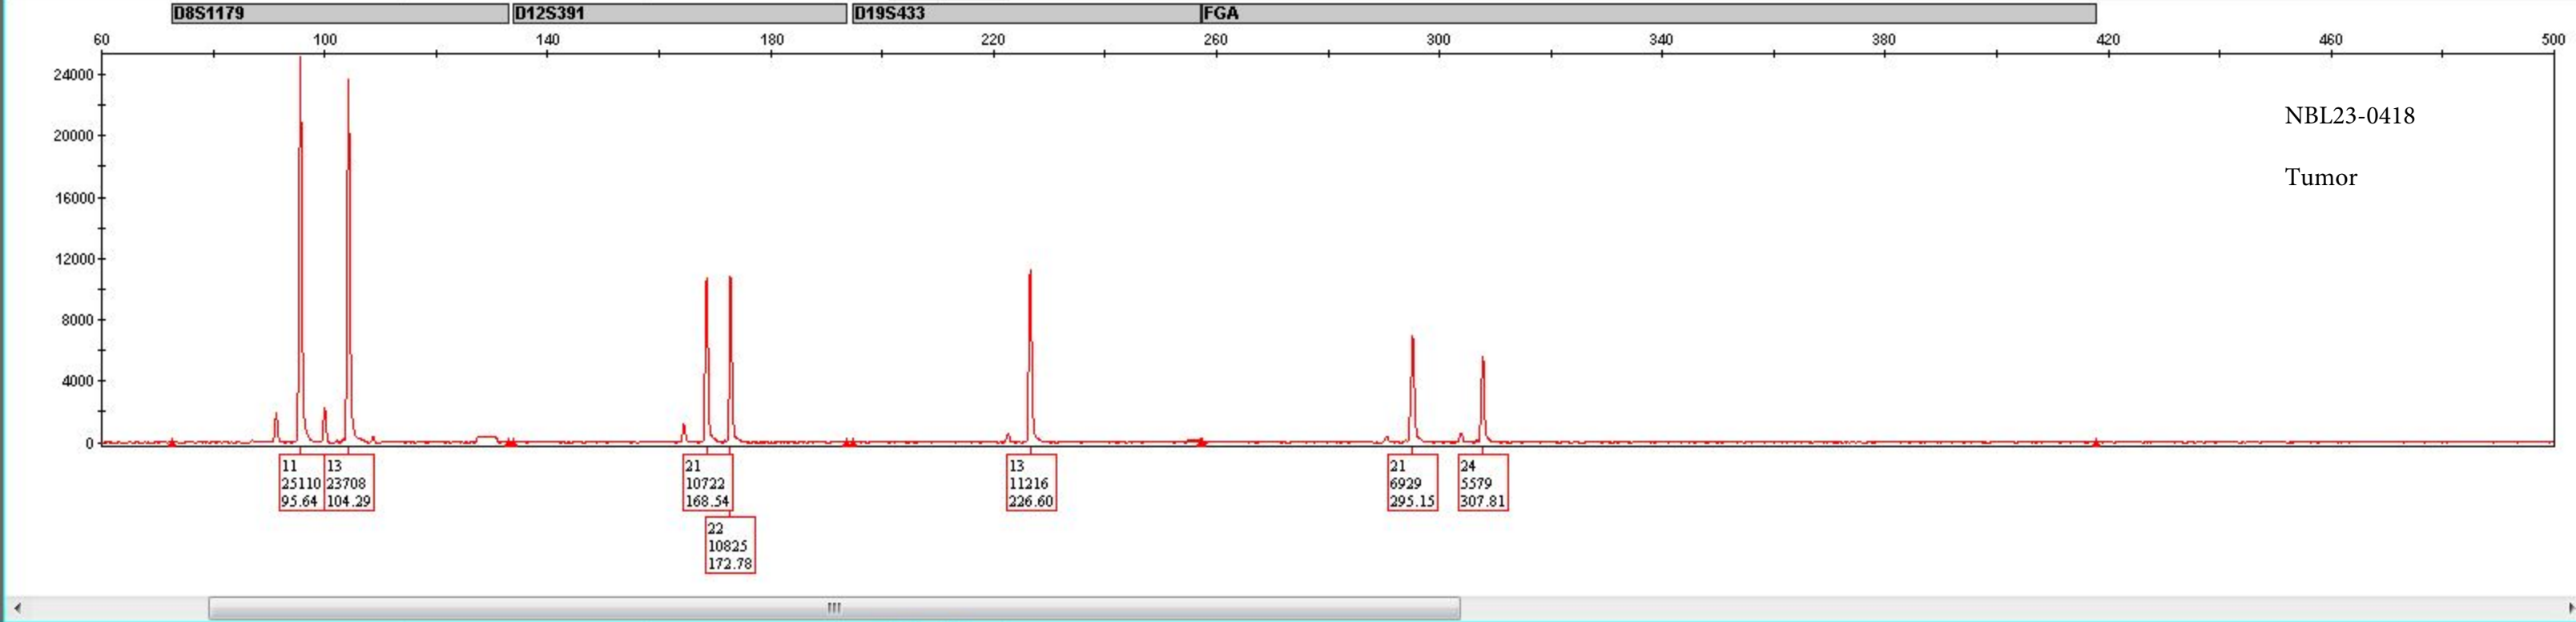

CL-23-0418\_F10\_Sample\_20190403\_153727.fsa CL-23-0418 PowerPlex\_21\_POP1\_I

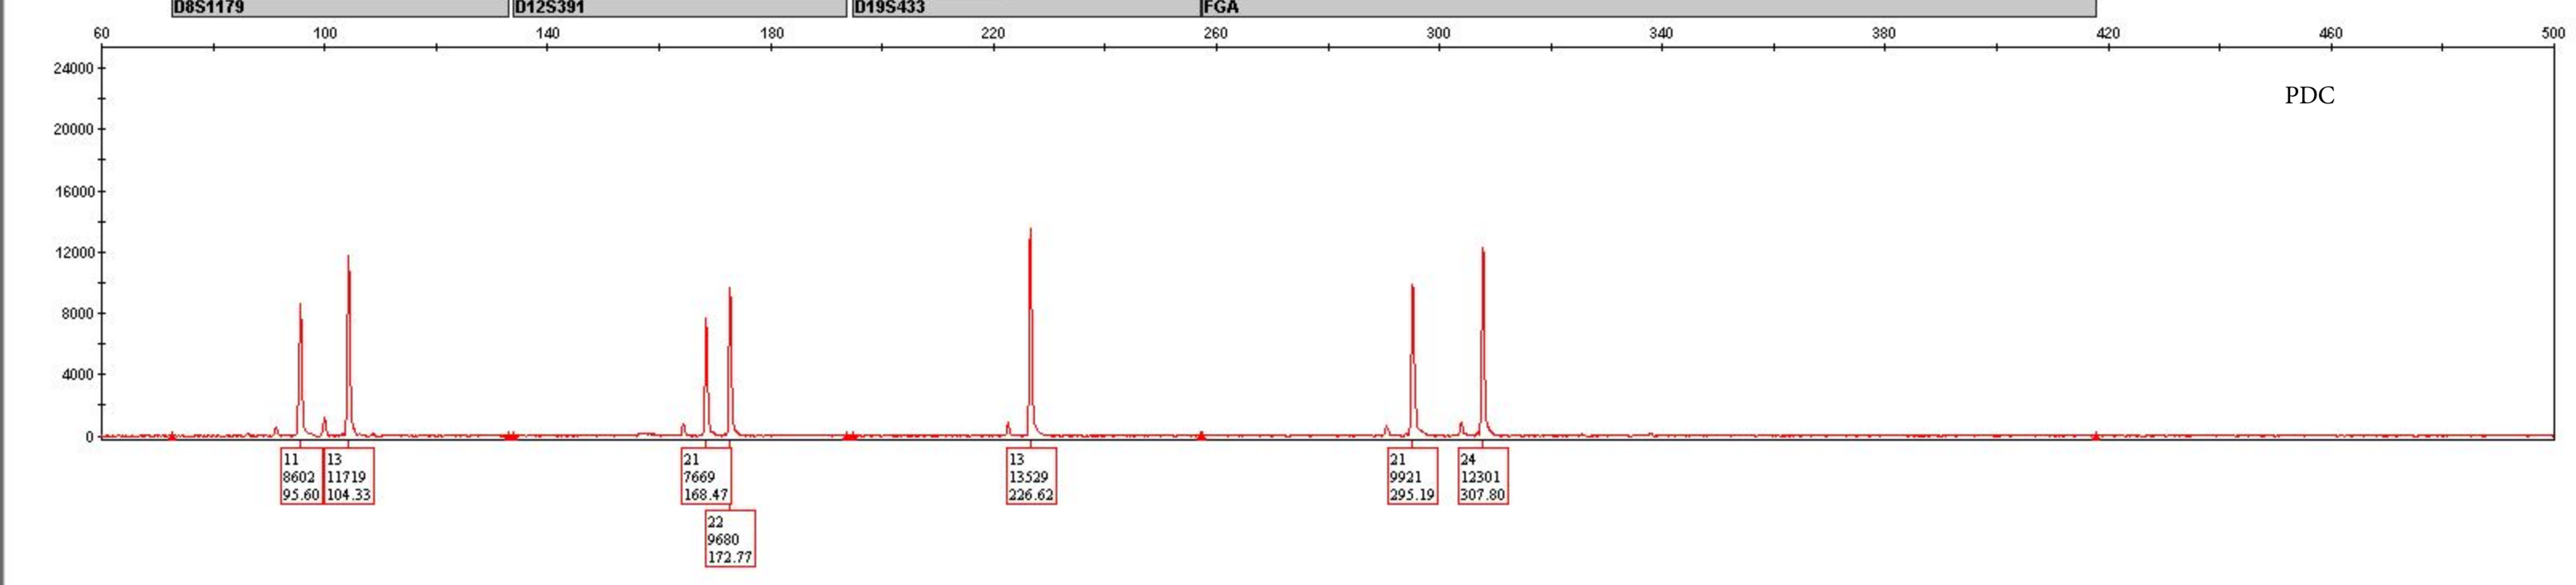

There are no controls in this selection

KD-18-760\_E10\_Sample\_20190403\_153726.fsa KD-18-760 PowerPlex\_21\_POP1\_I

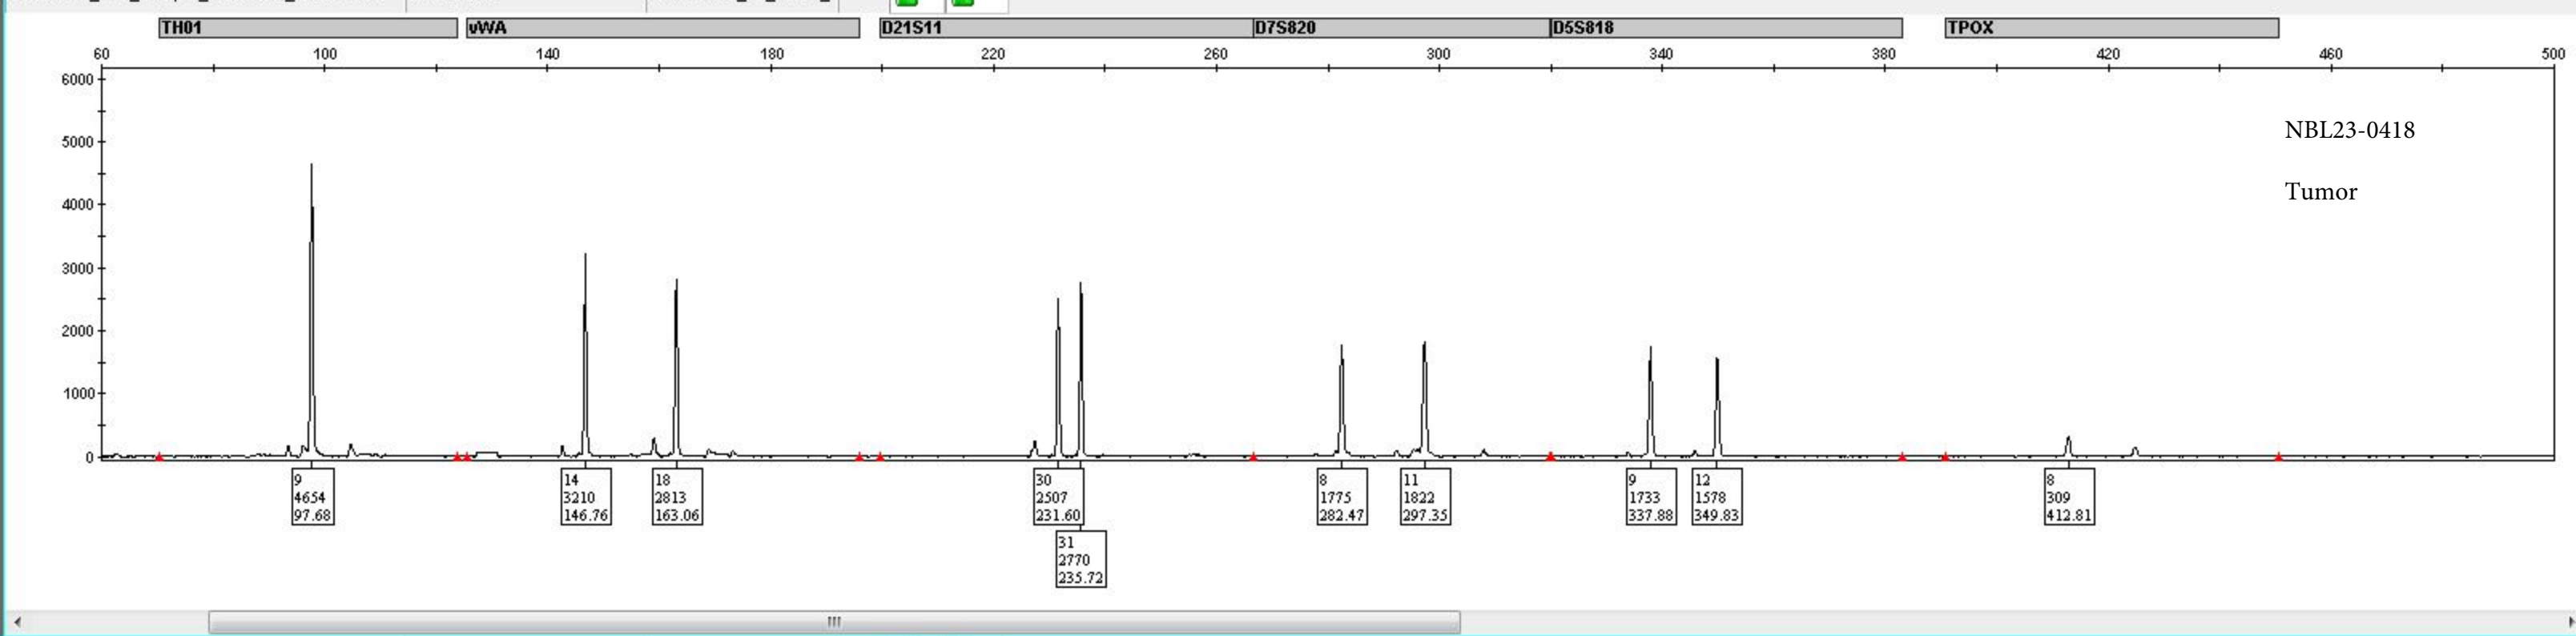

CL-23-0418\_F10\_Sample\_20190403\_153727.fsa CL-23-0418 PowerPlex\_21\_POP1\_I

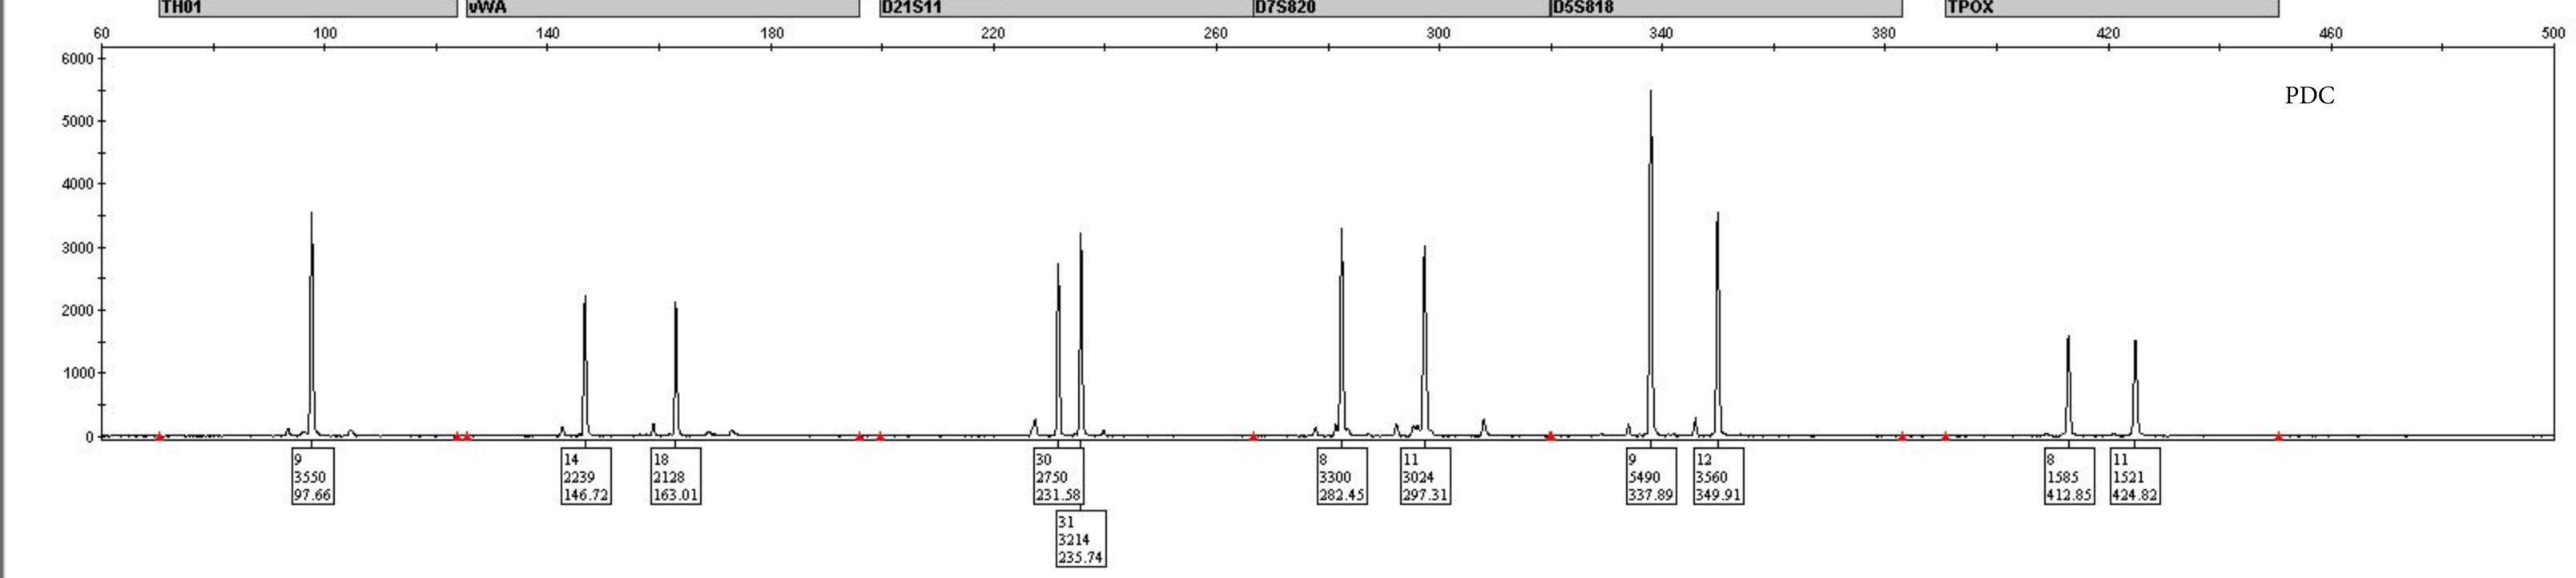



There are no controls in this selection

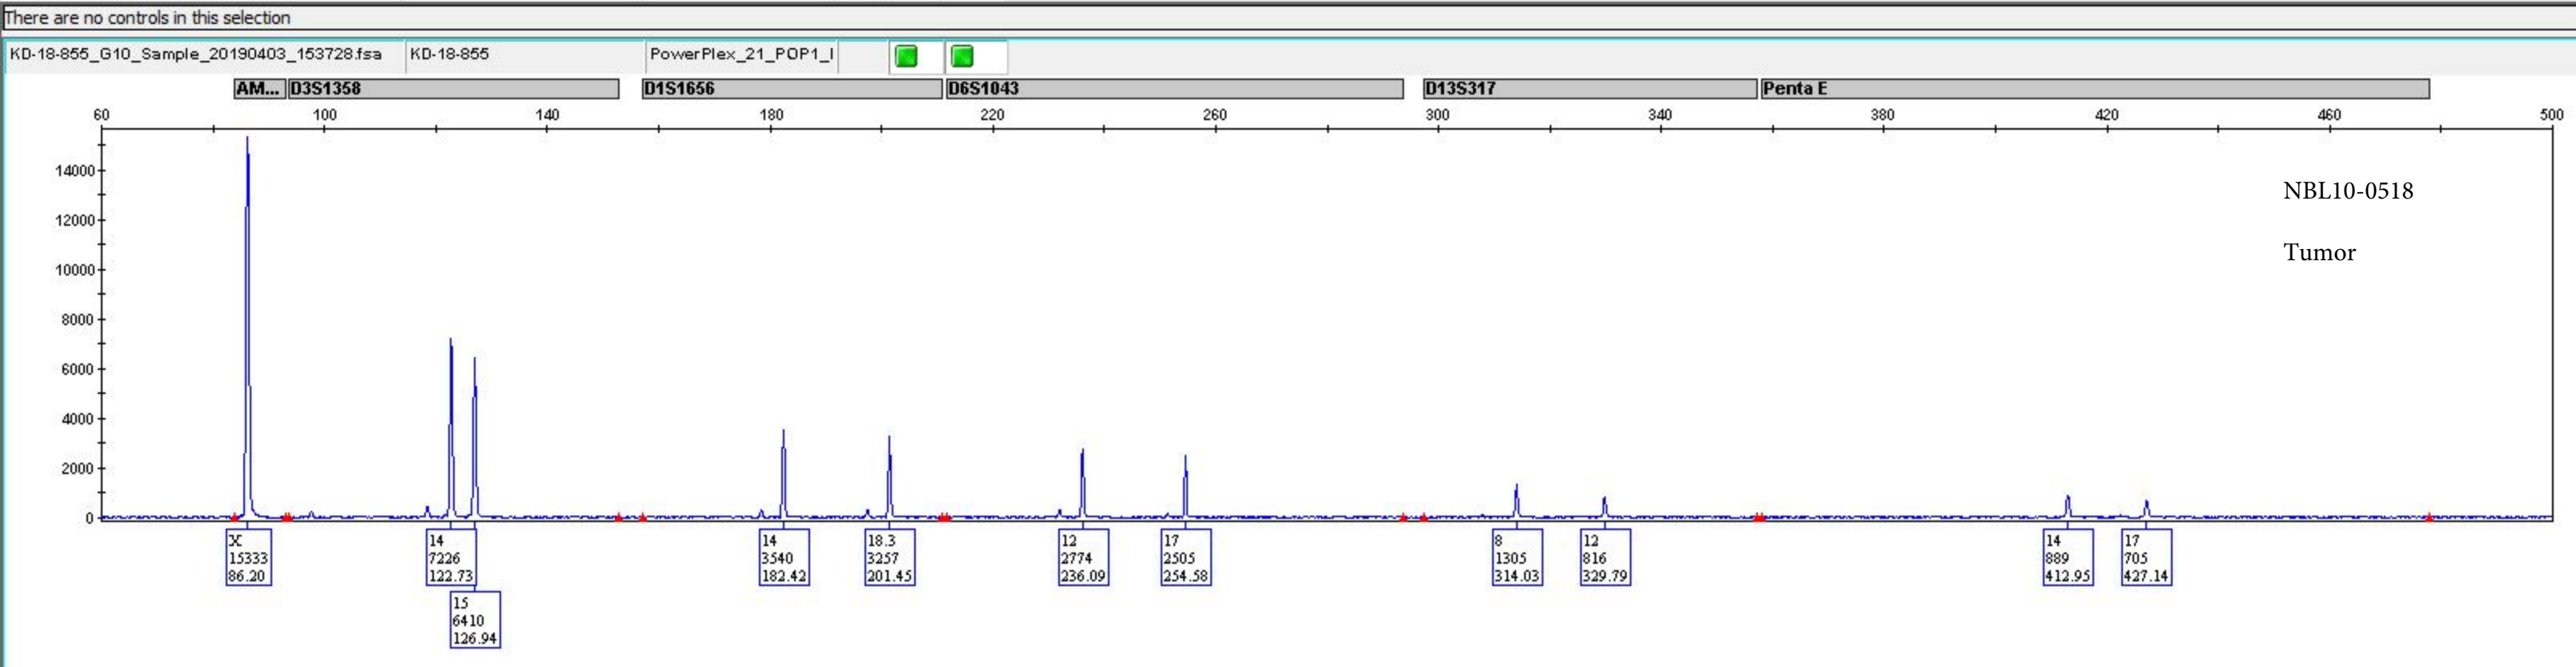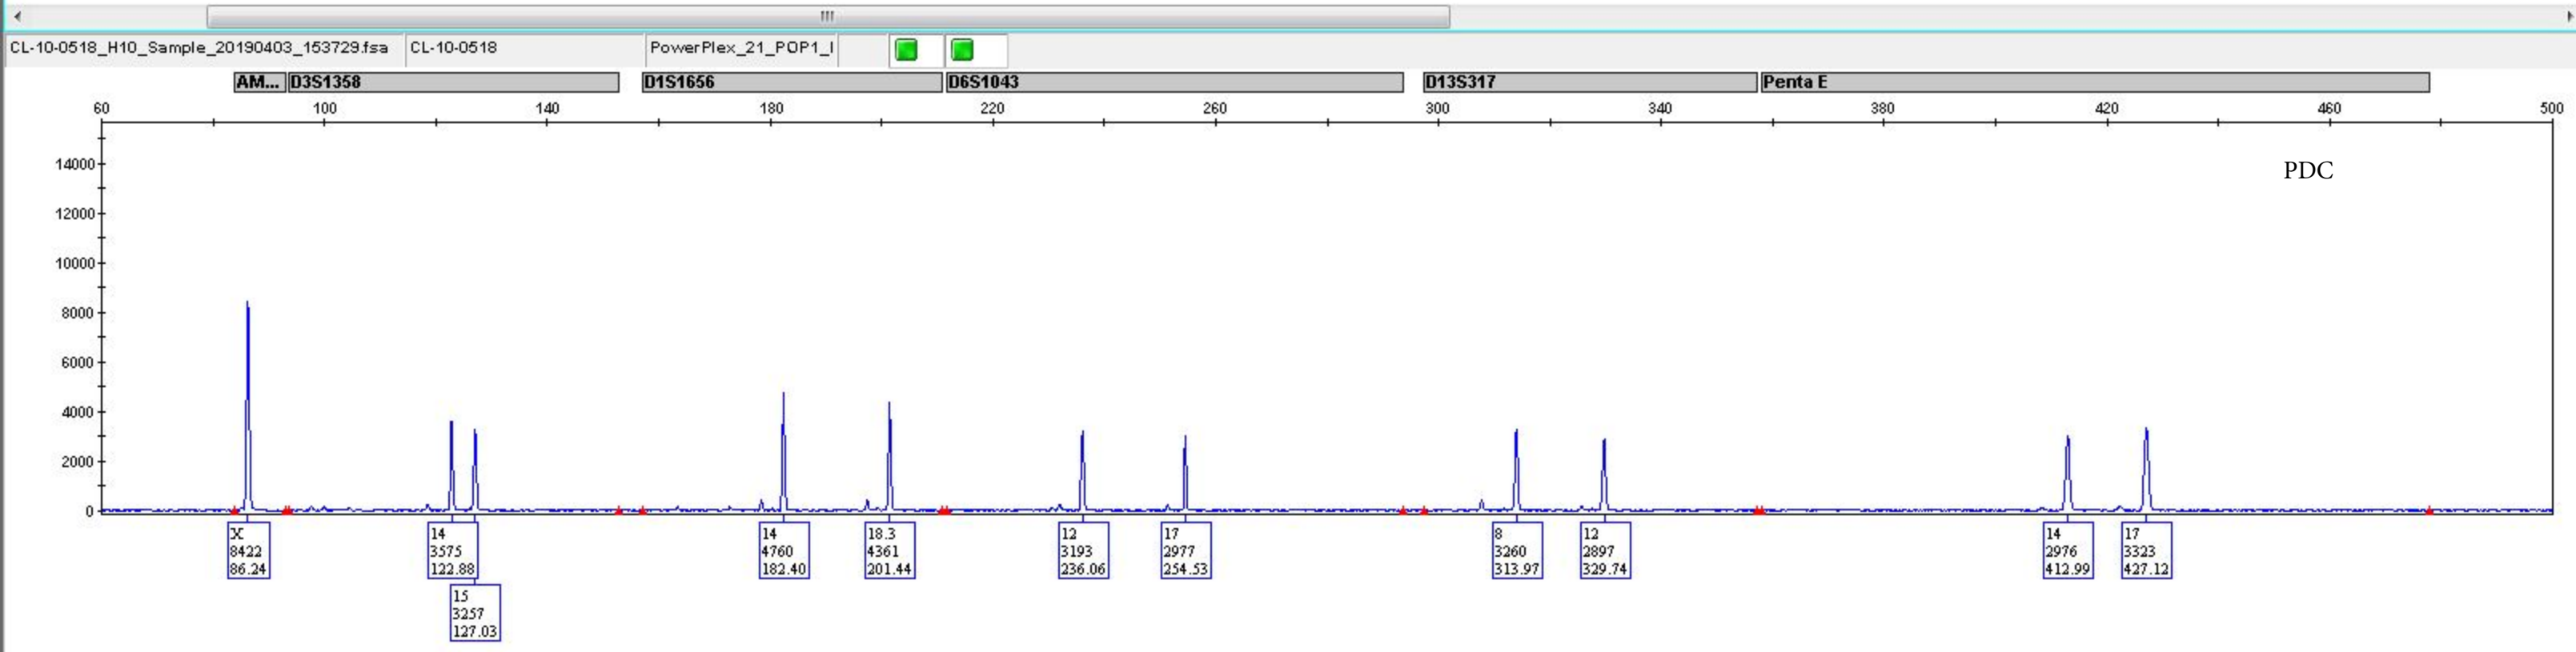

There are no controls in this selection

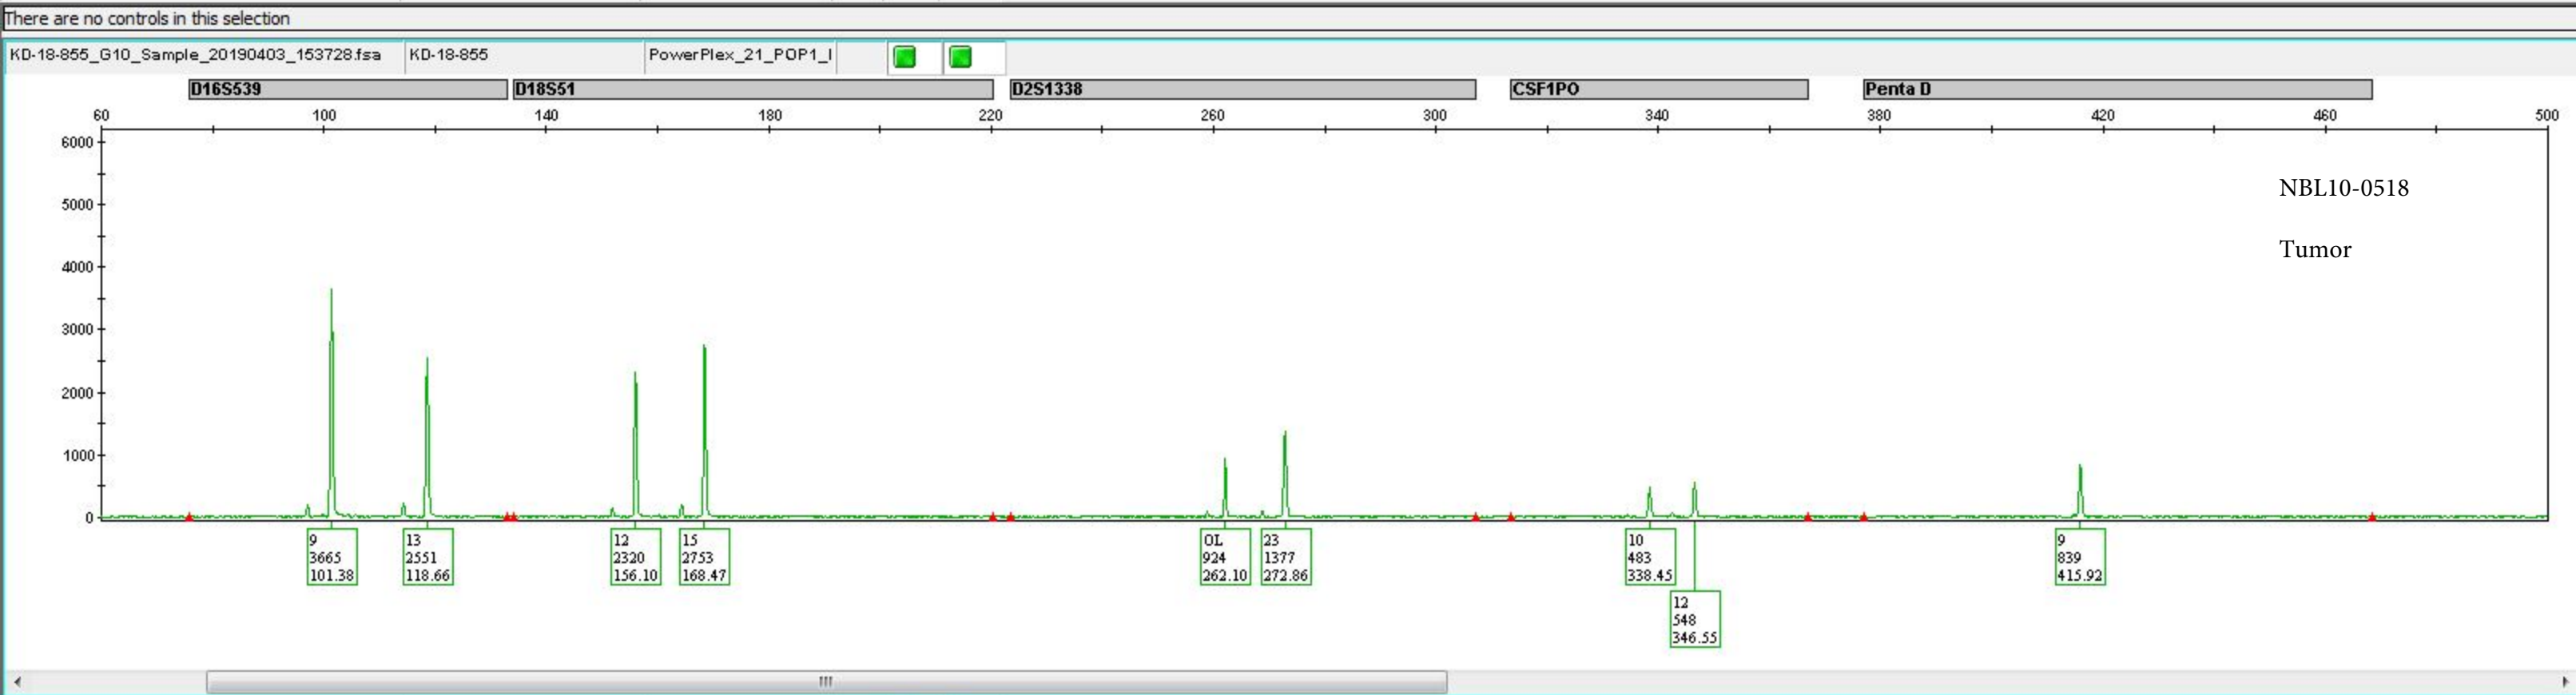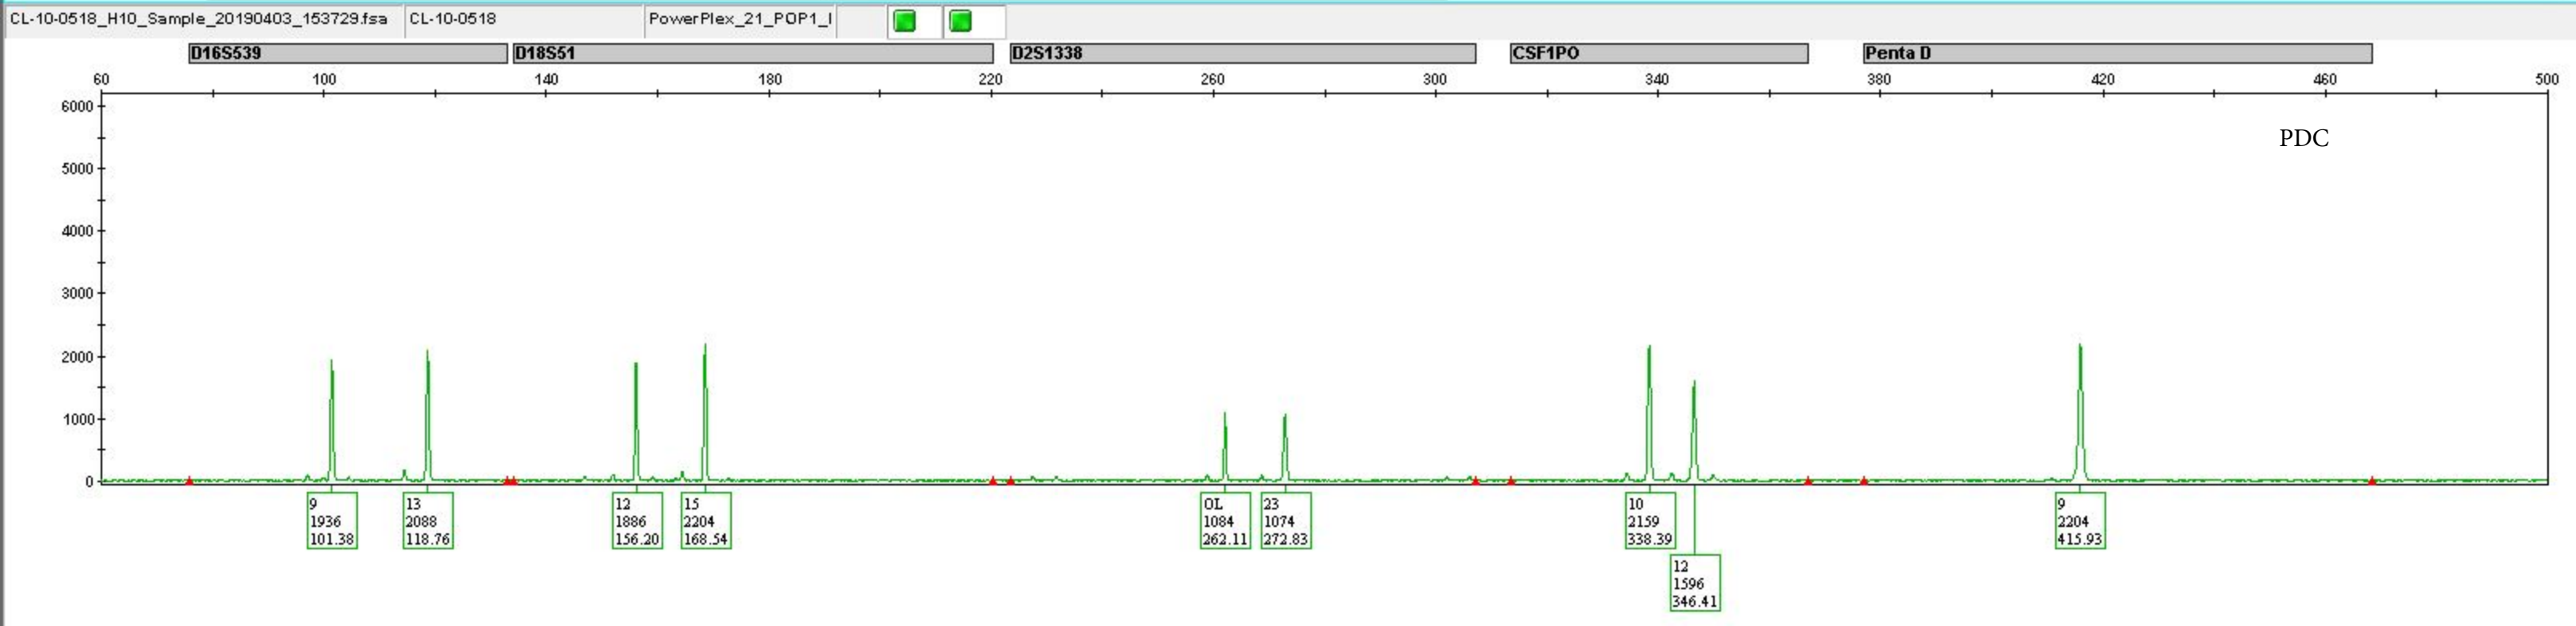

There are no controls in this selection

KD-18-855\_G10\_Sample\_20190403\_153728.fsa KD-18-855 PowerPlex\_21\_POP1\_I

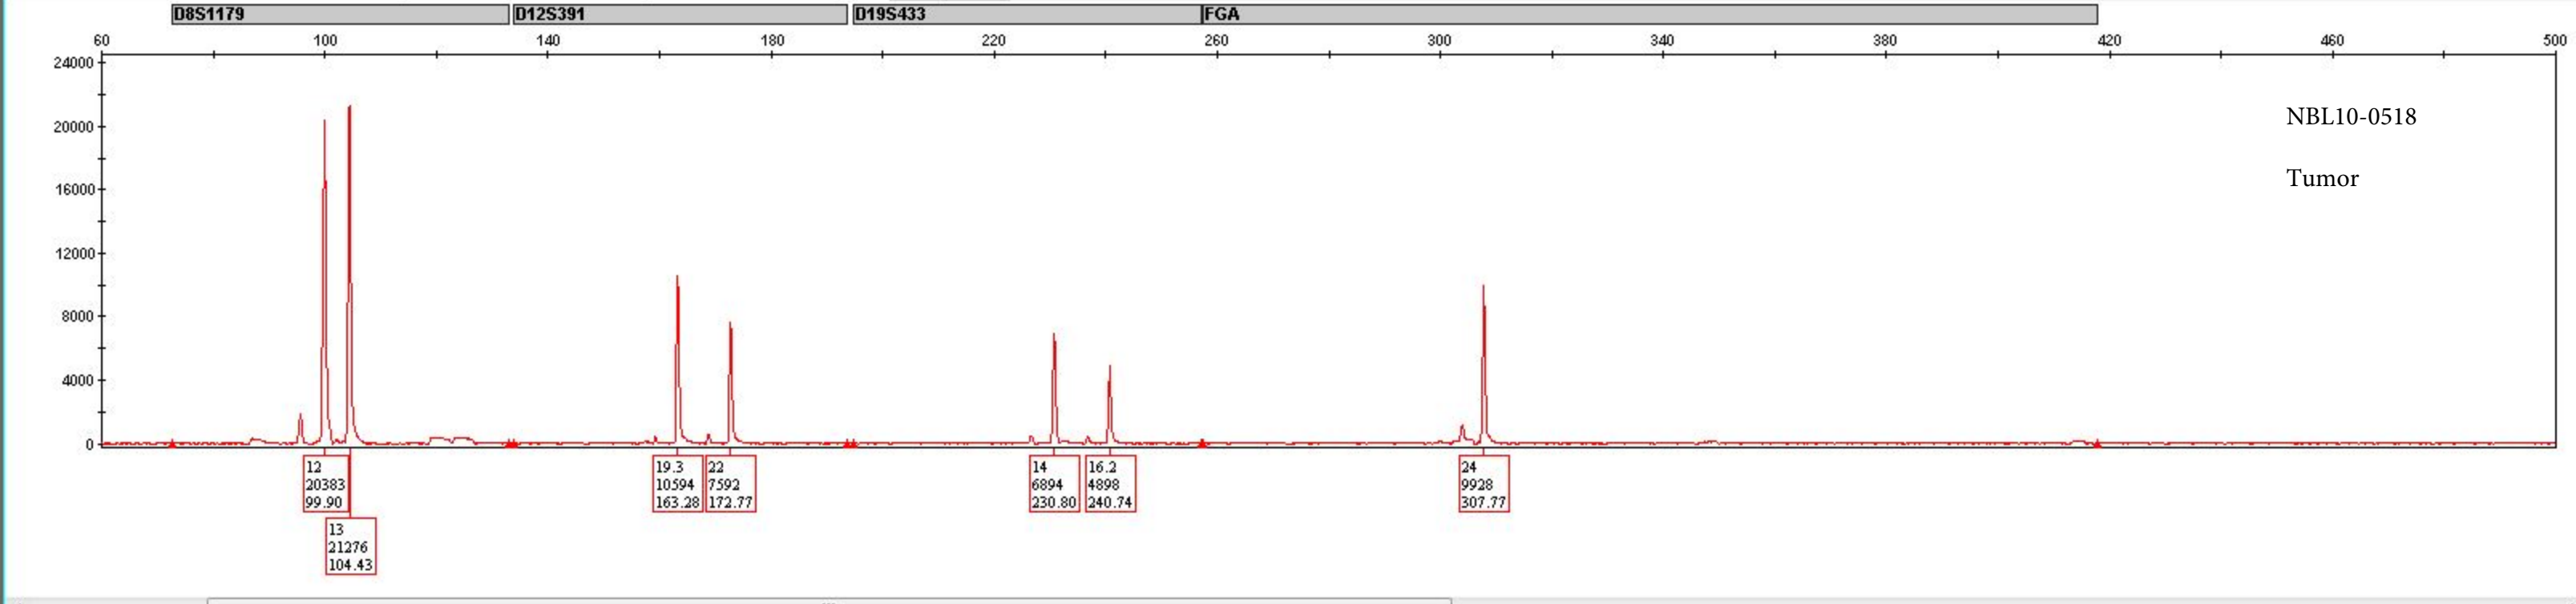

CL-10-0518\_H10\_Sample\_20190403\_153729.fsa CL-10-0518 PowerPlex\_21\_POP1\_I

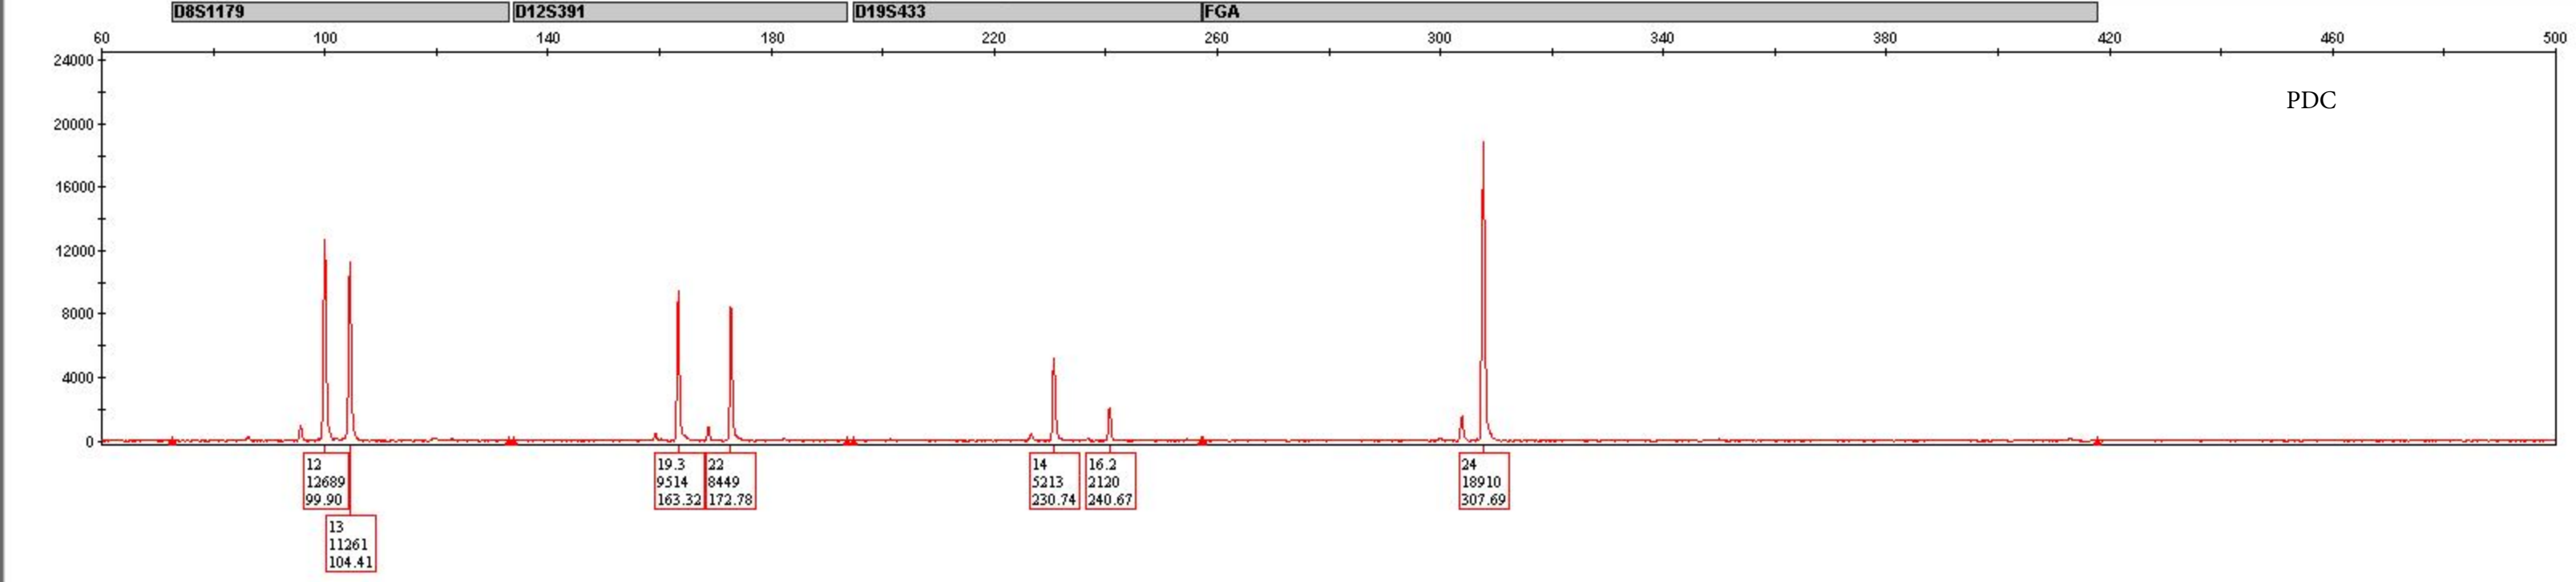

There are no controls in this selection

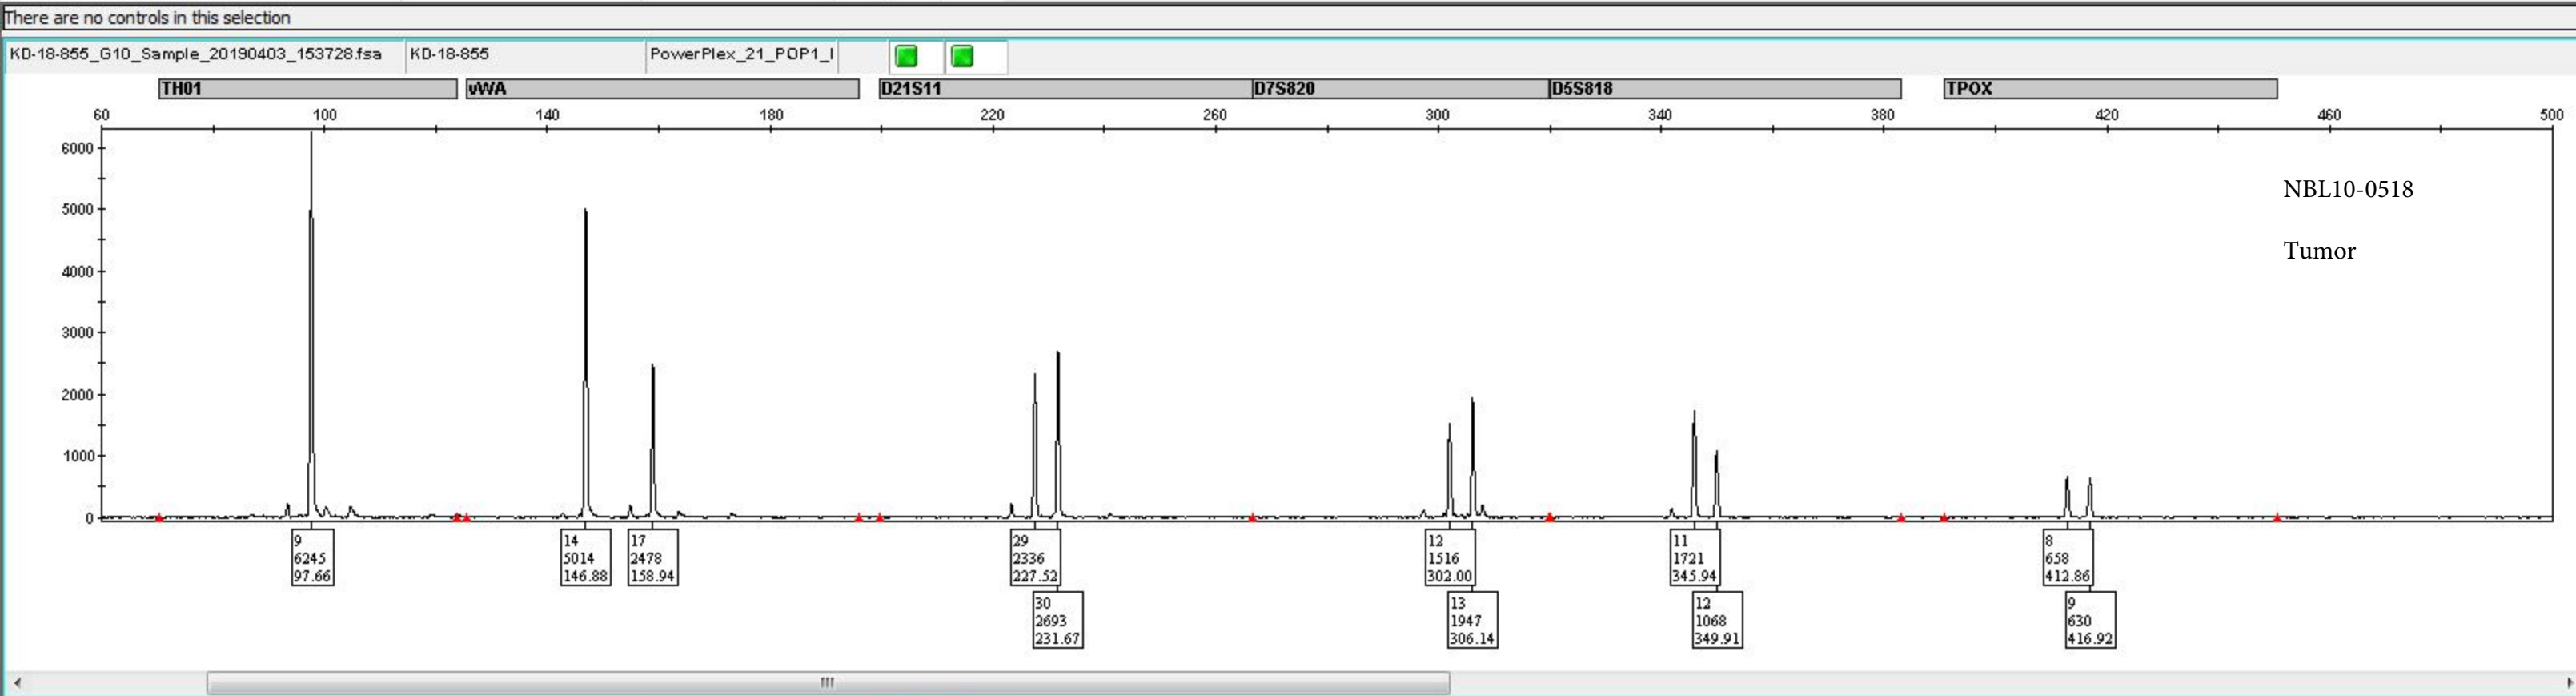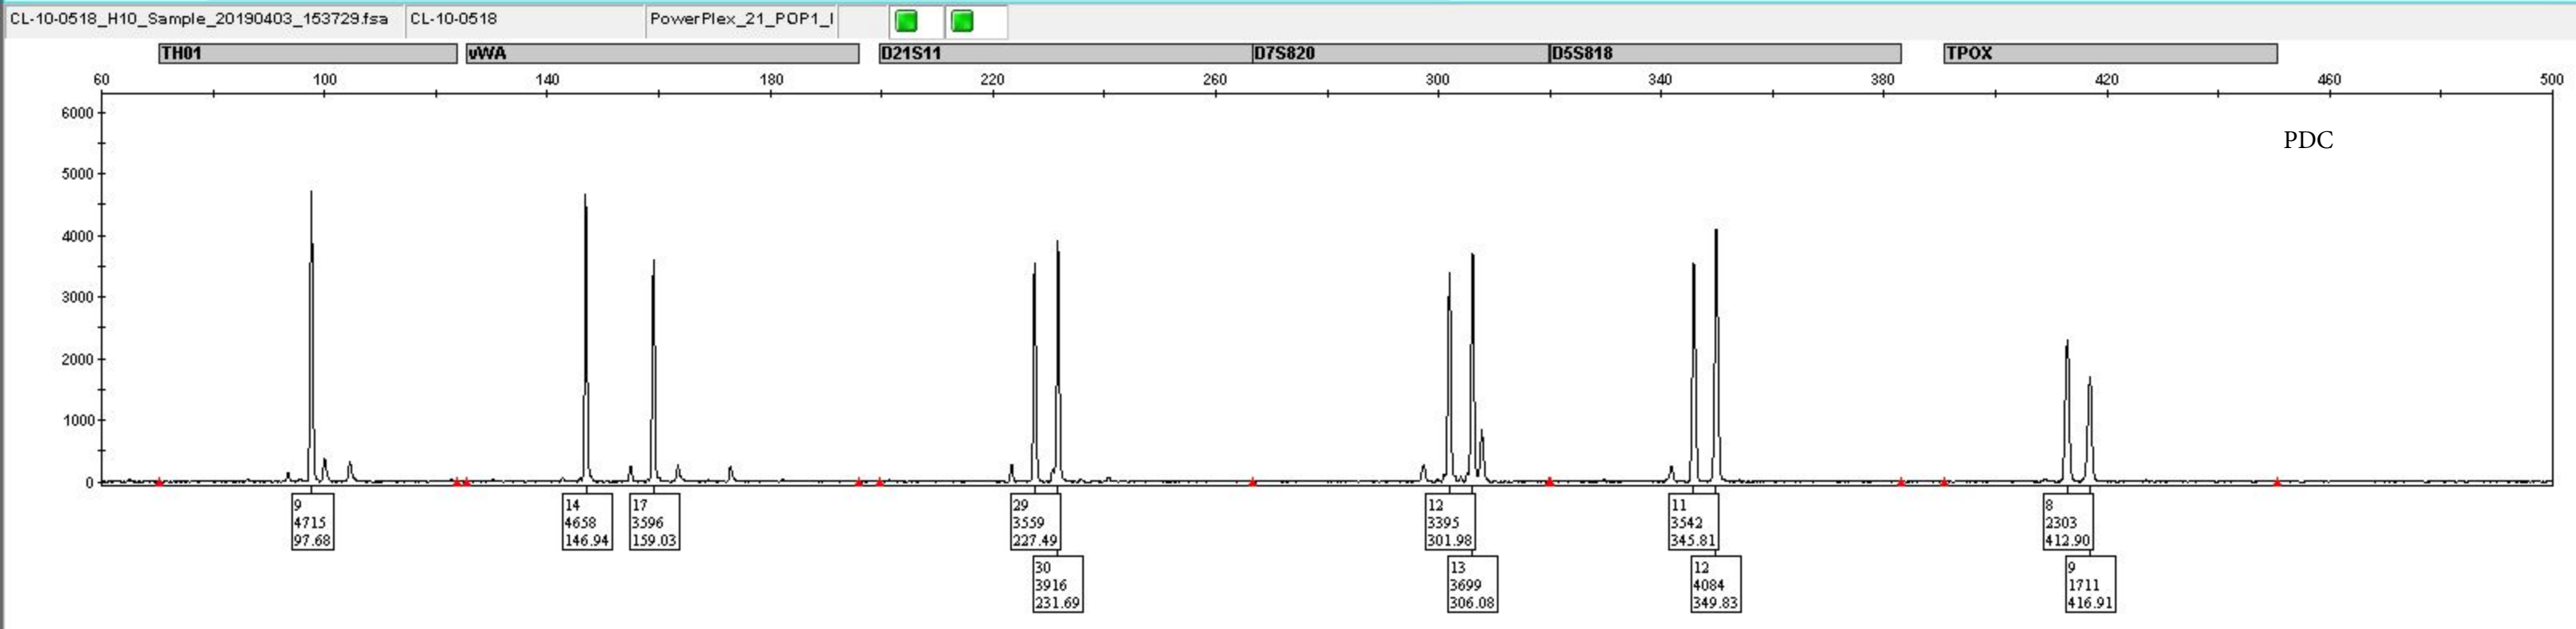

There are no controls in this selection

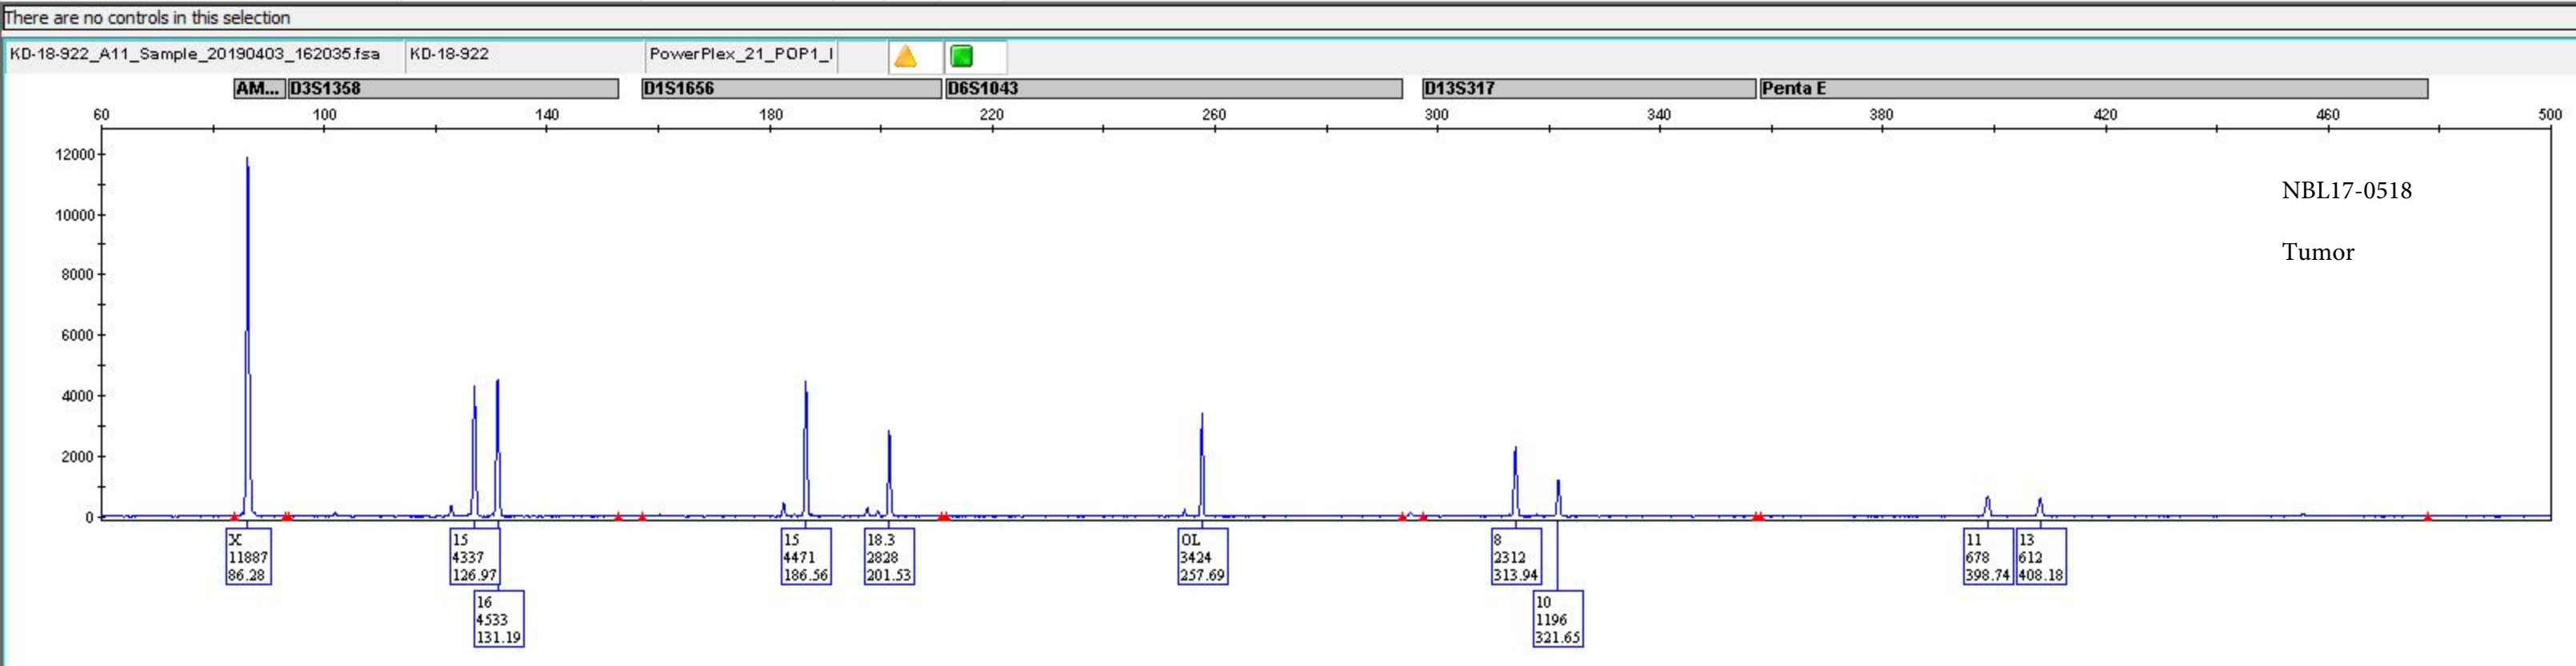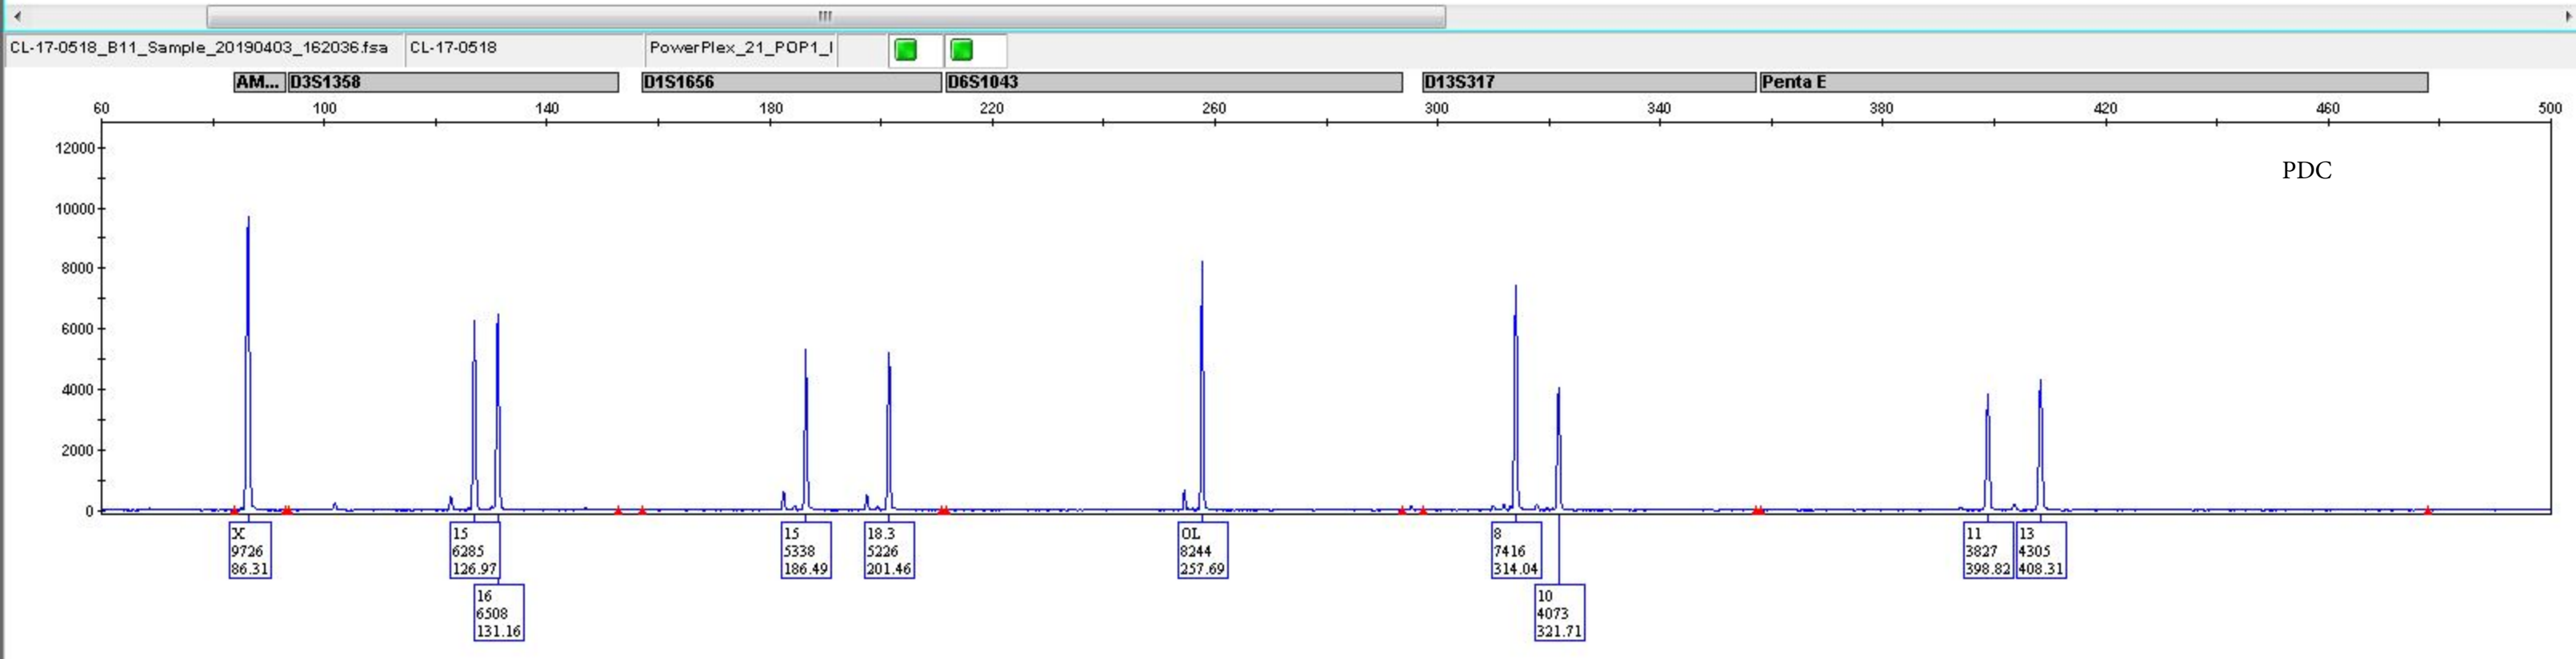

There are no controls in this selection

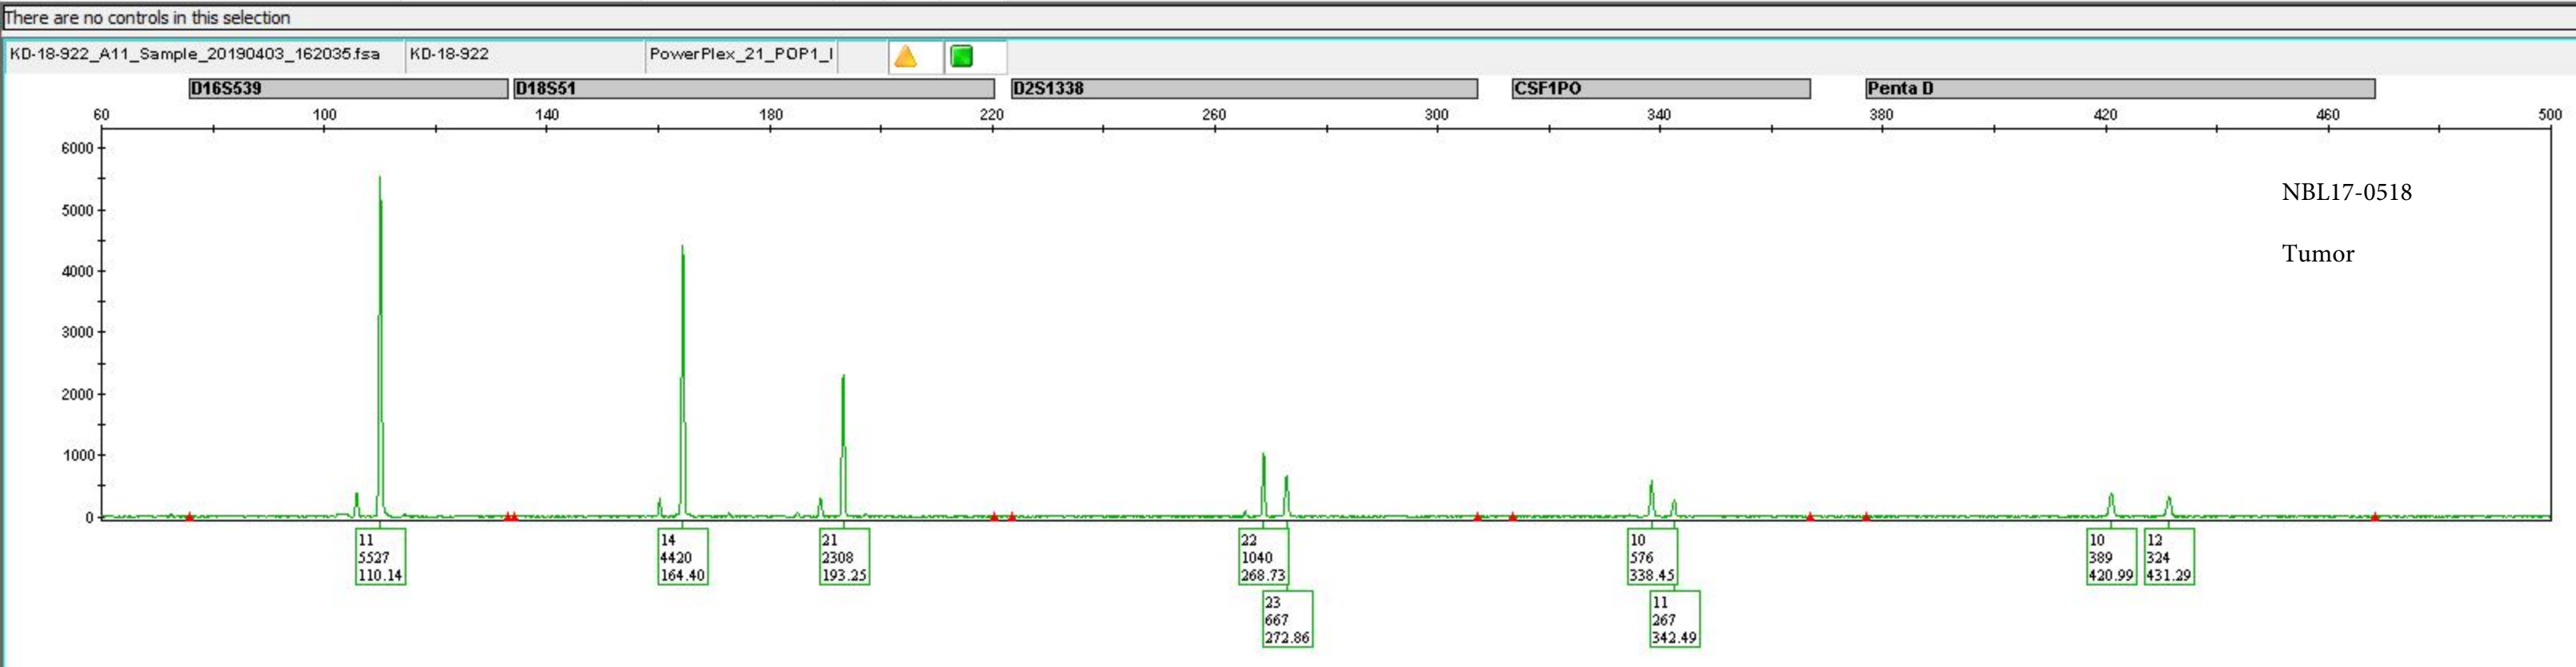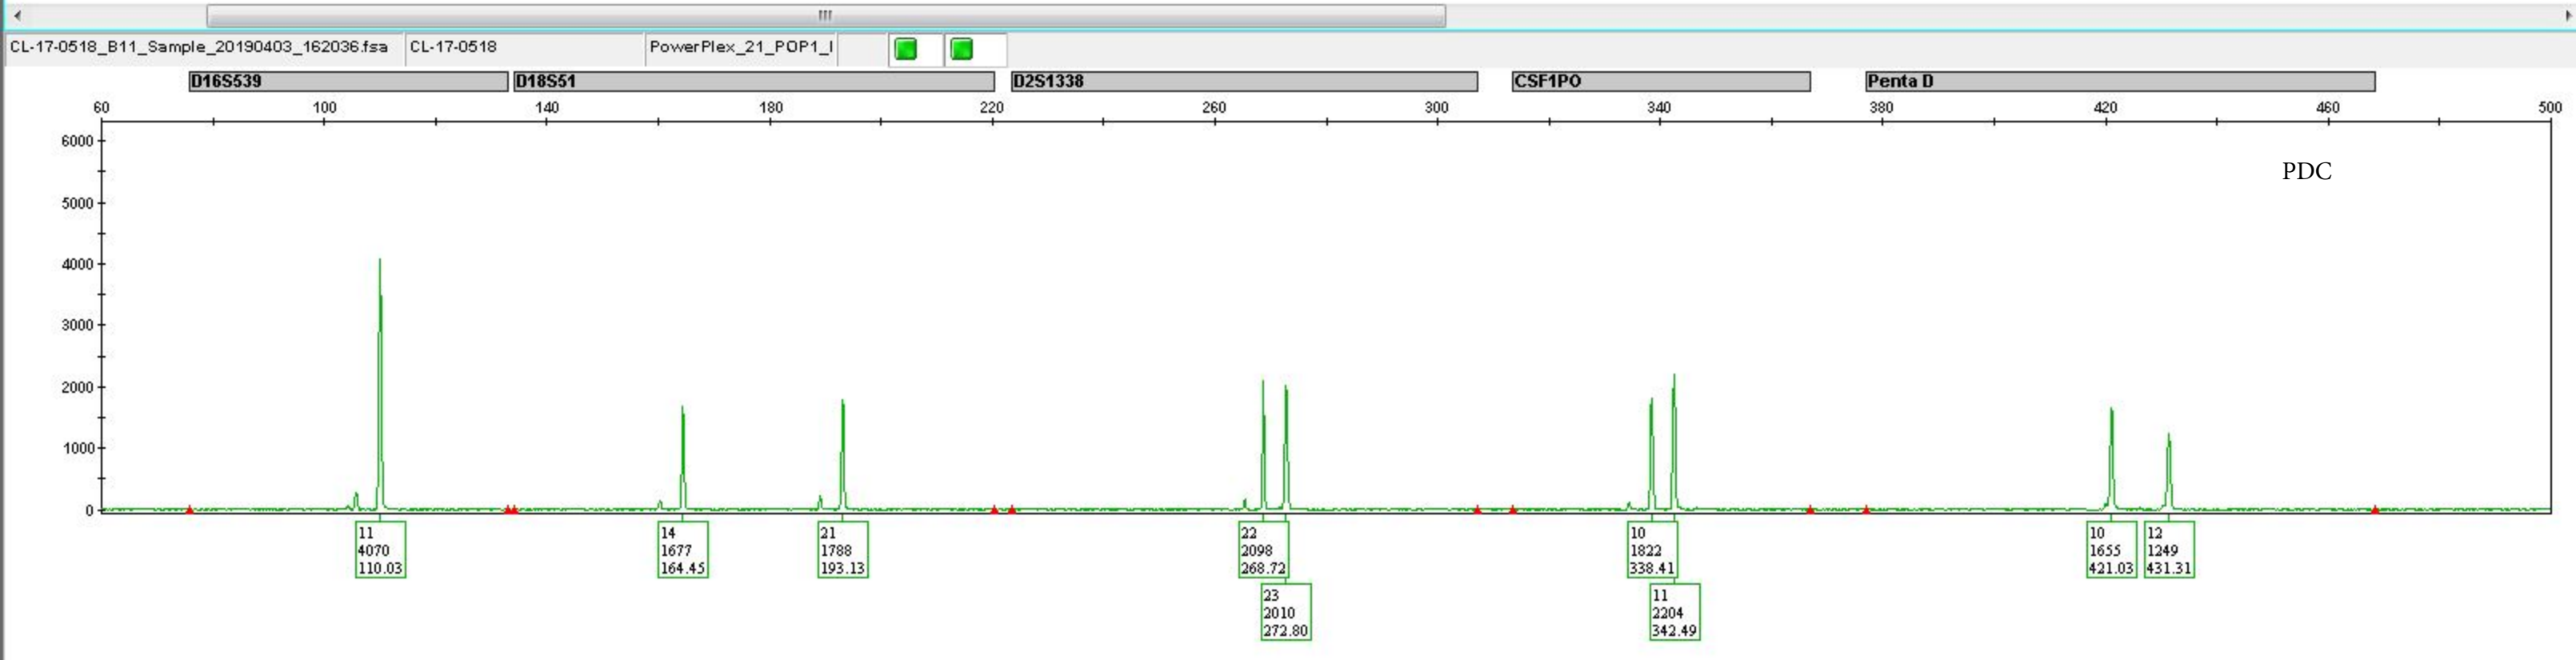

There are no controls in this selection

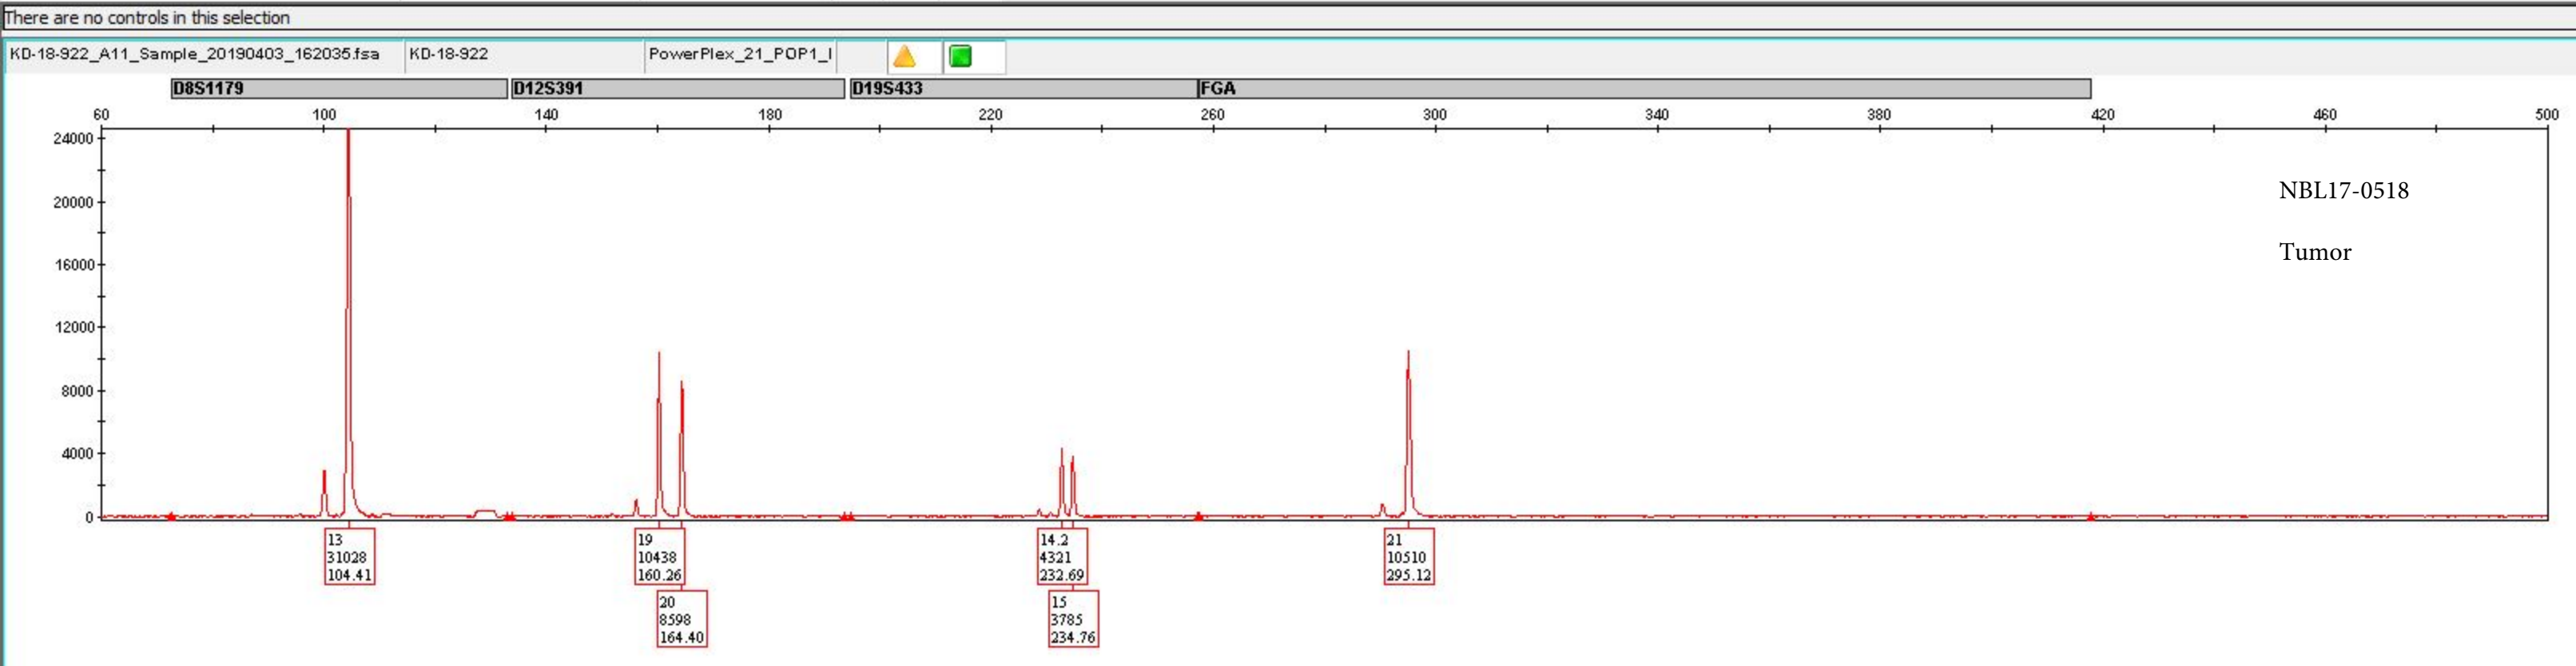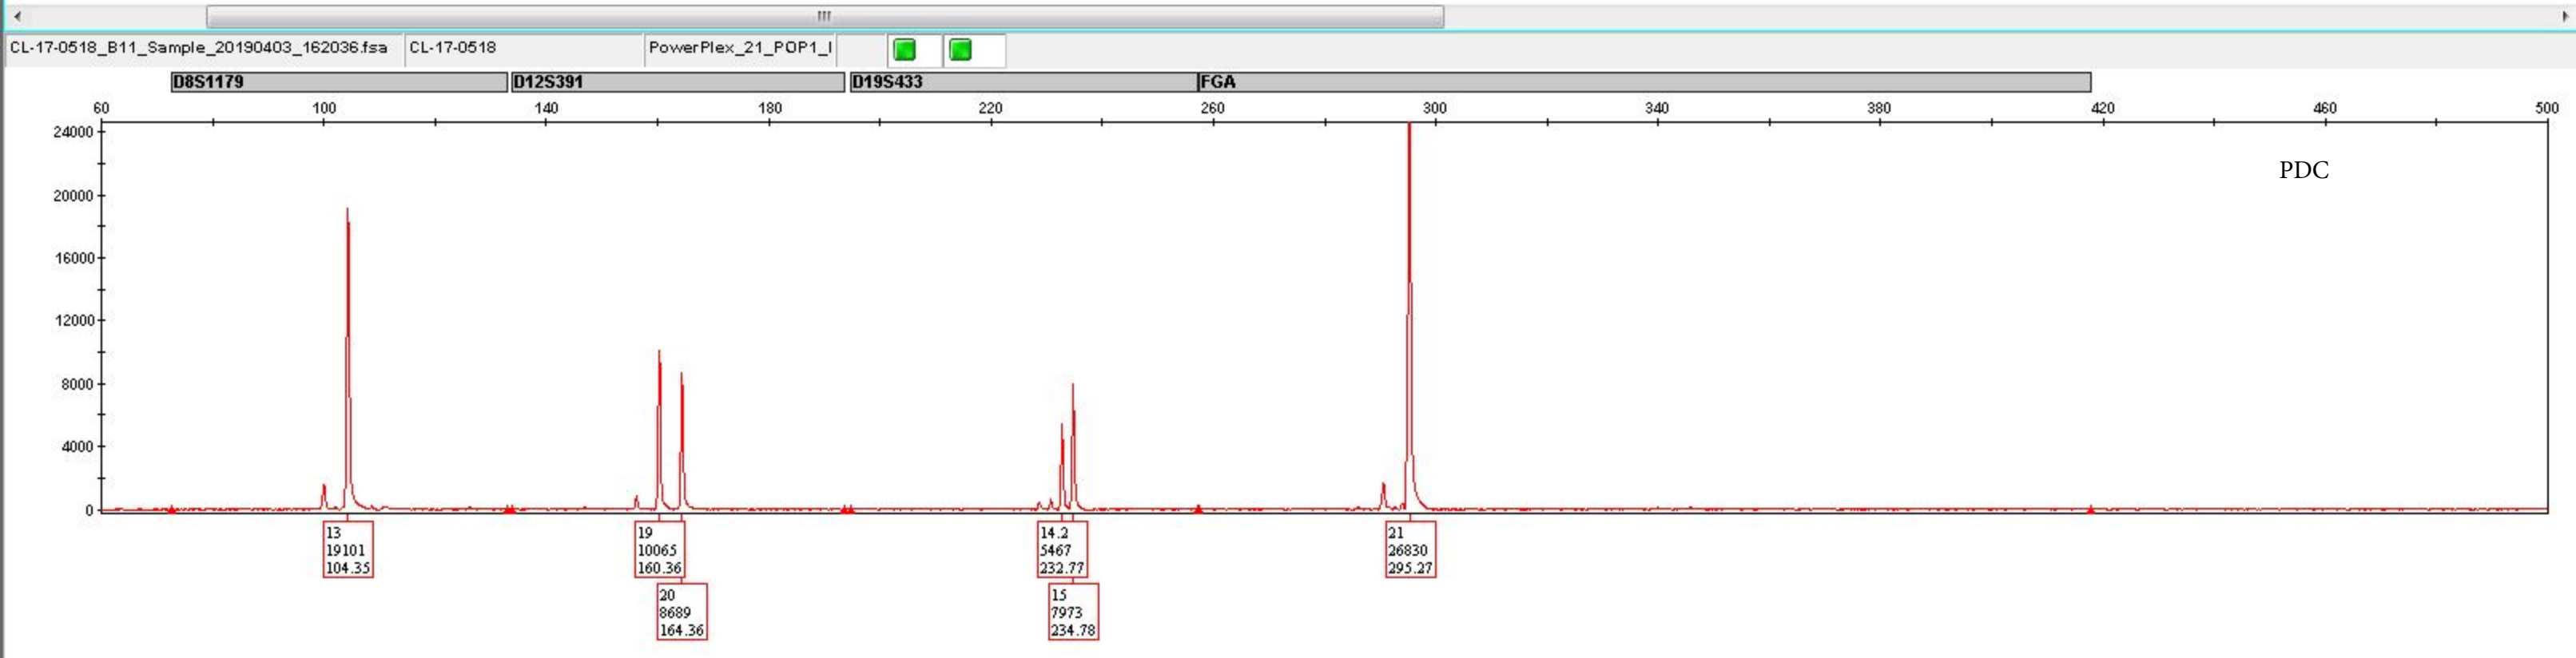

There are no controls in this selection

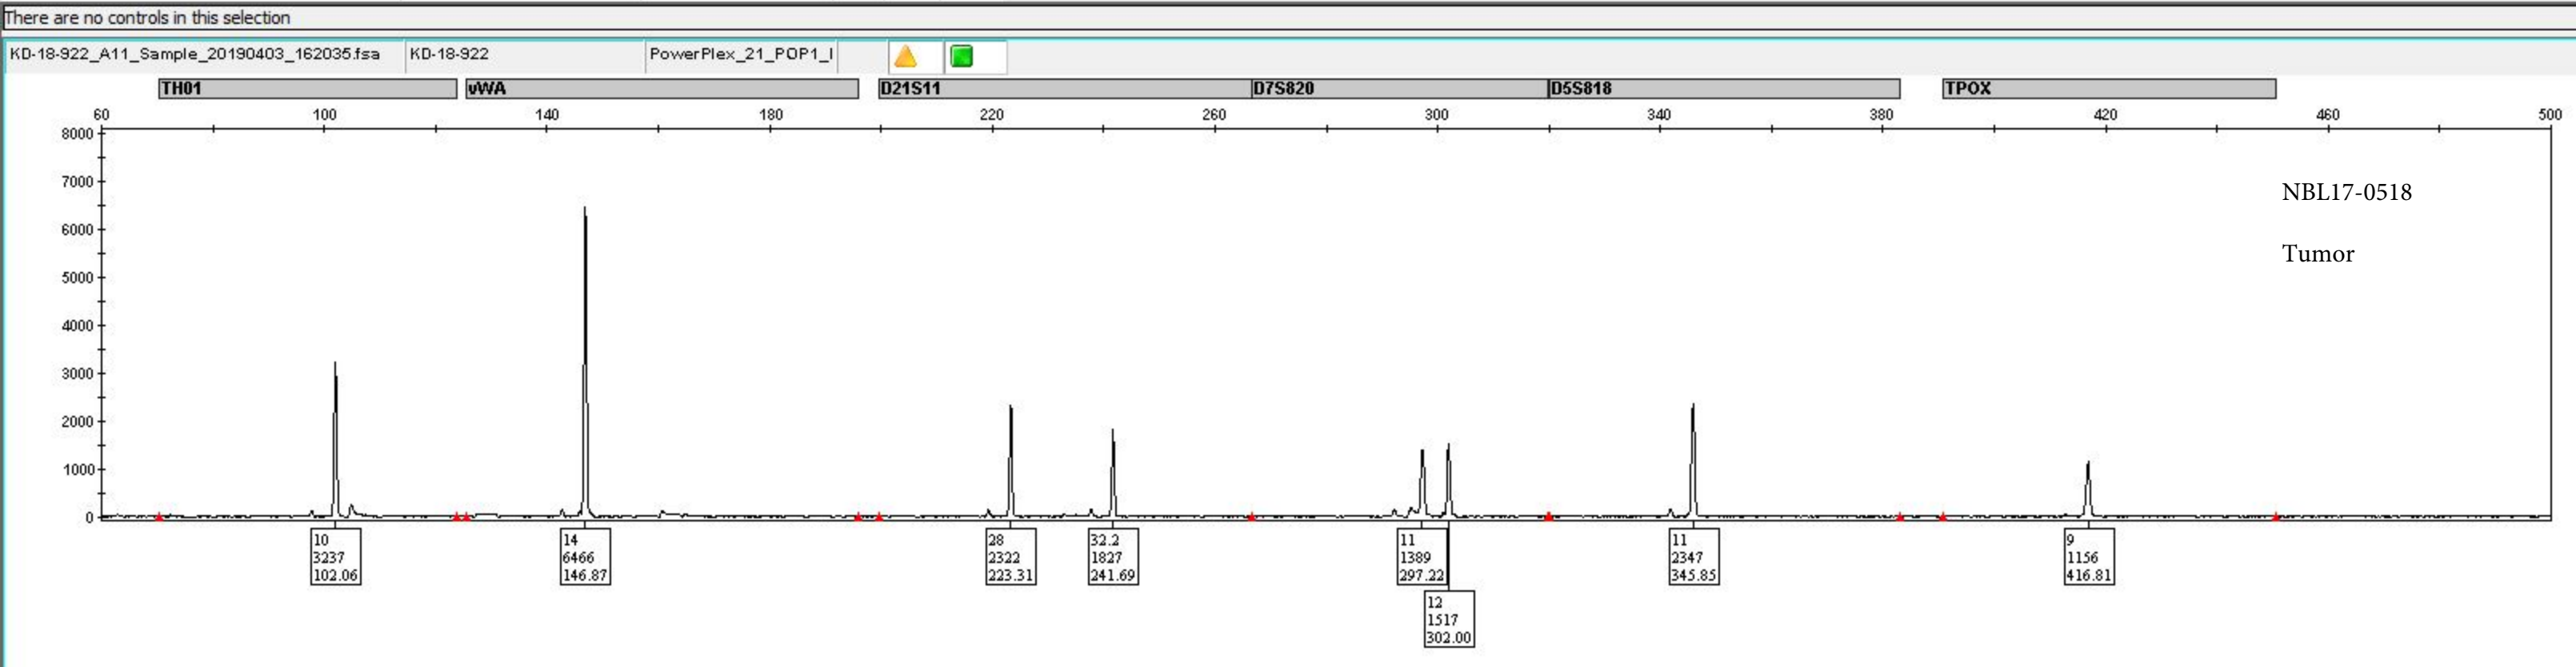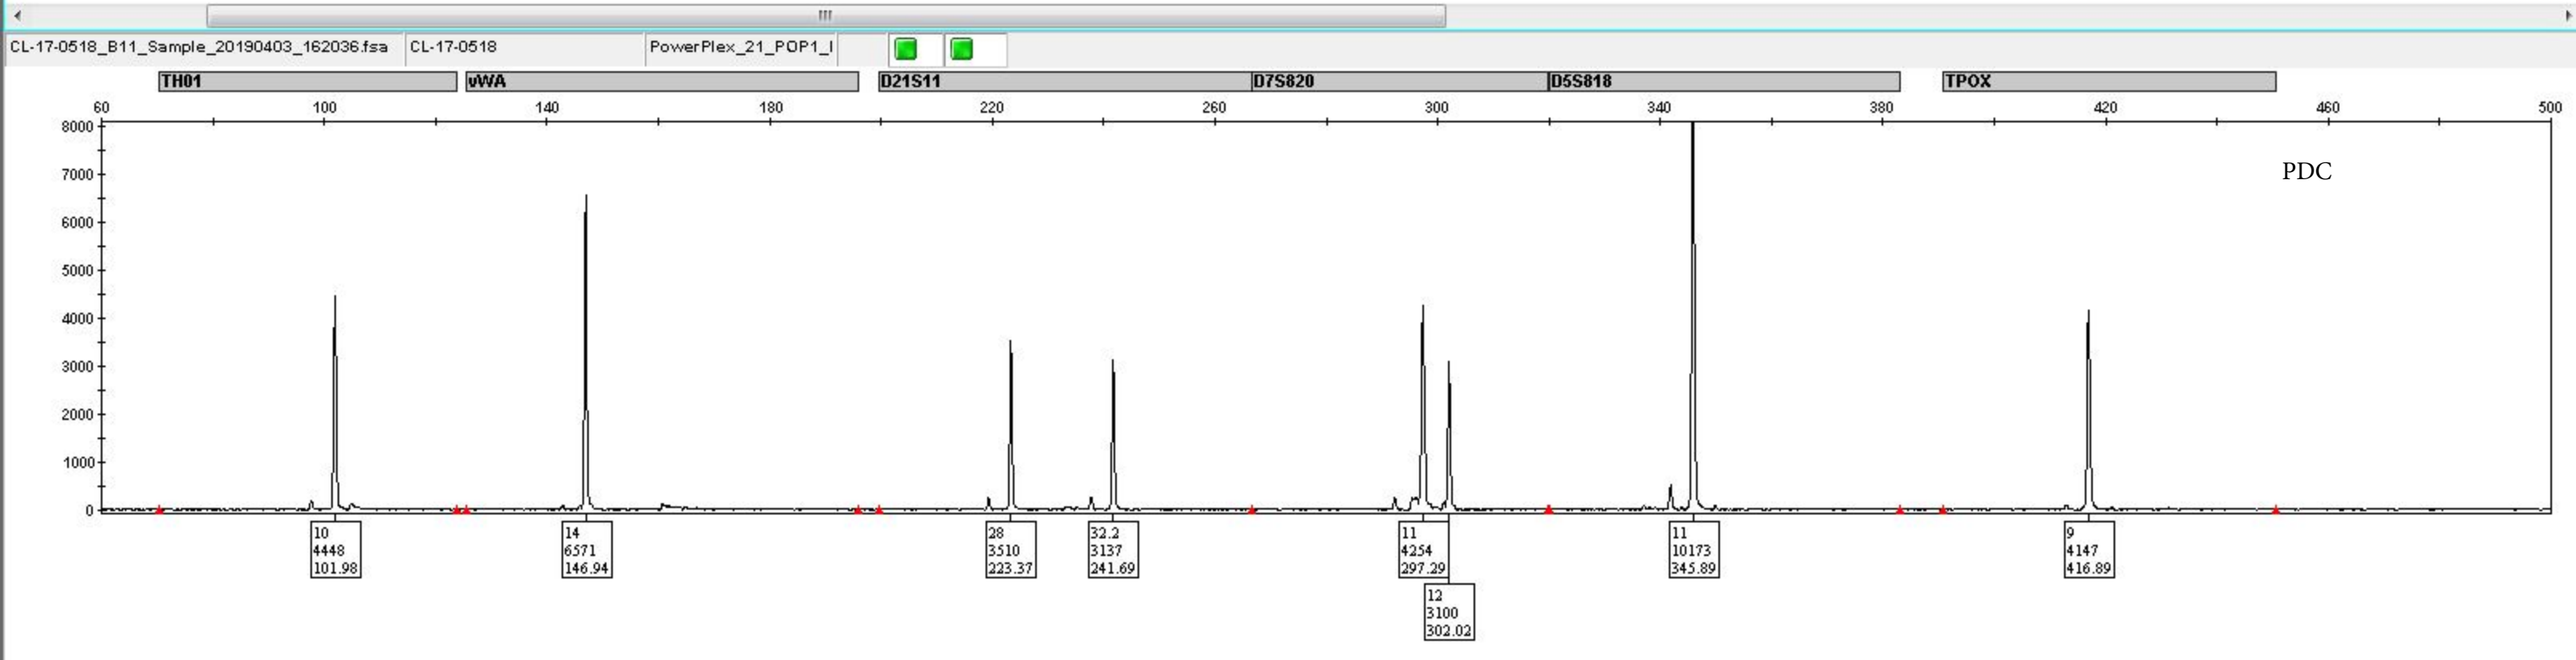



Plot Setting: PowerPlex21 Panes: 2

| Sample File | Sample Name | Panel | SQI | OS | SQ |
|-------------|-------------|-------|-----|----|----|
|-------------|-------------|-------|-----|----|----|

There are no controls in this selection

NB7\_G1\_Sample\_20200408\_111304.fsa NB7 PowerPlex\_21\_P0P1\_I

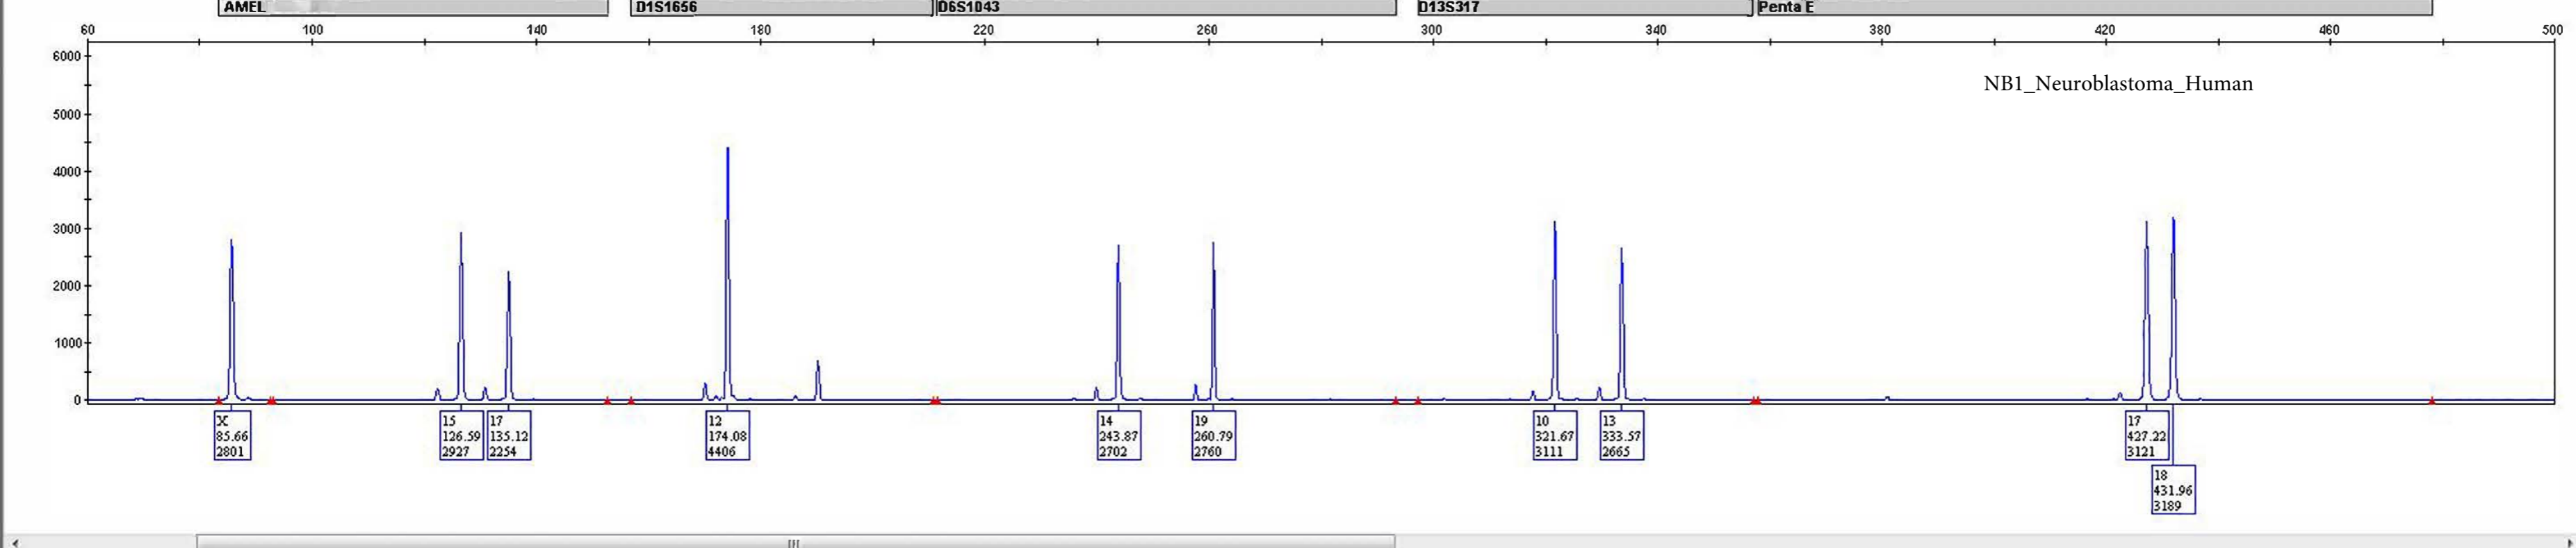

NB7\_G1\_Sample\_20200408\_111304.fsa NB7 PowerPlex\_21\_P0P1\_I

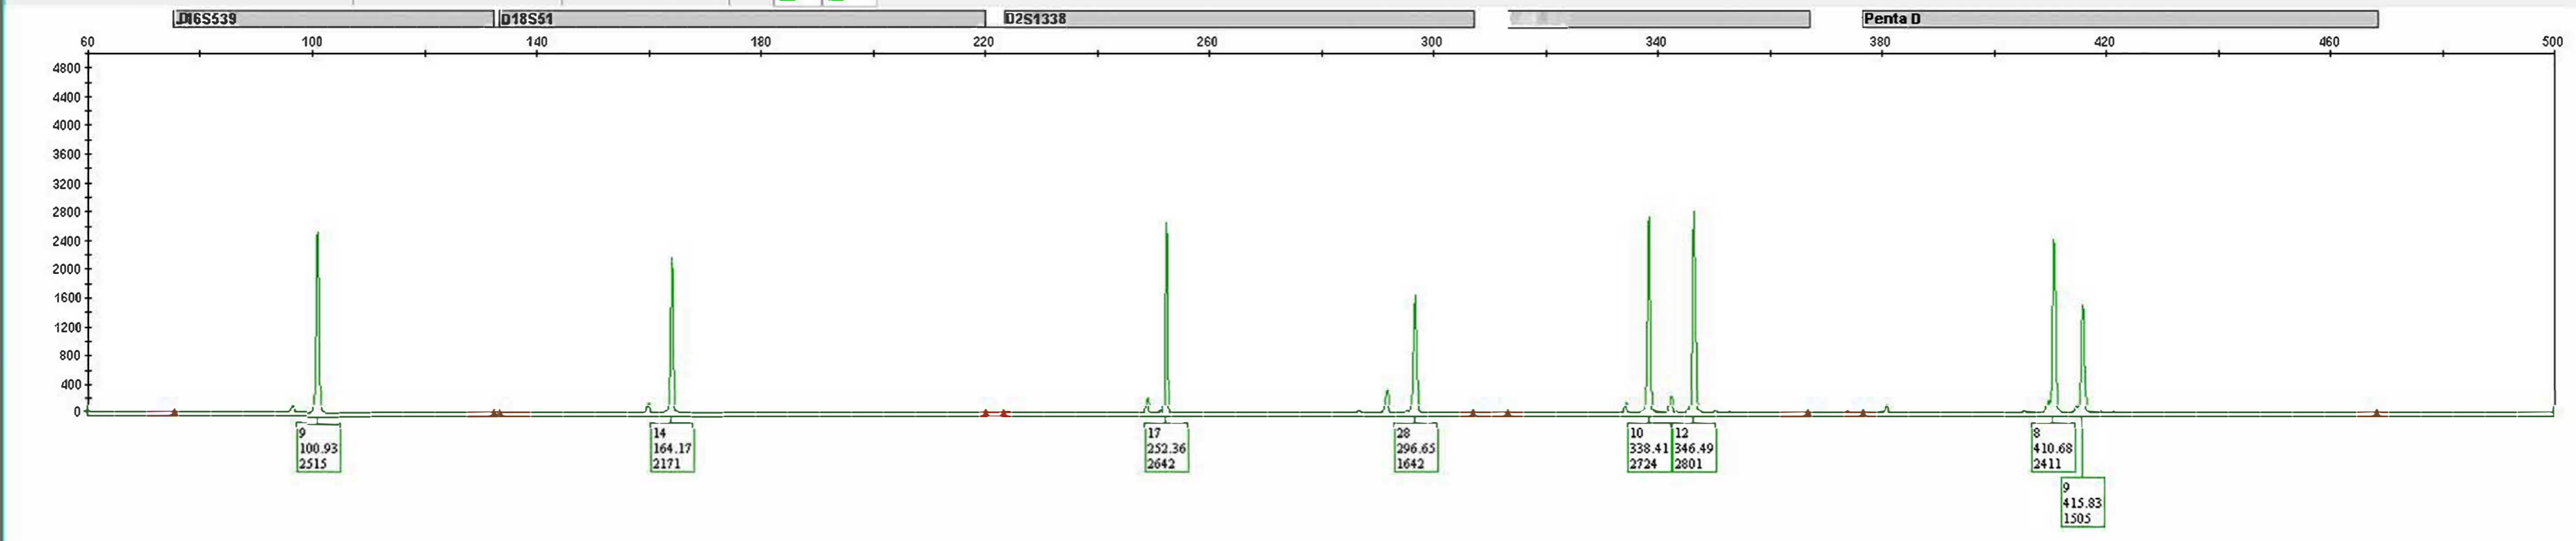

Plot Setting: PowerPlex21 Panes: 2

| Sample File | Sample Name | Panel | SQI | OS | SQ |
|-------------|-------------|-------|-----|----|----|
|-------------|-------------|-------|-----|----|----|

There are no controls in this selection

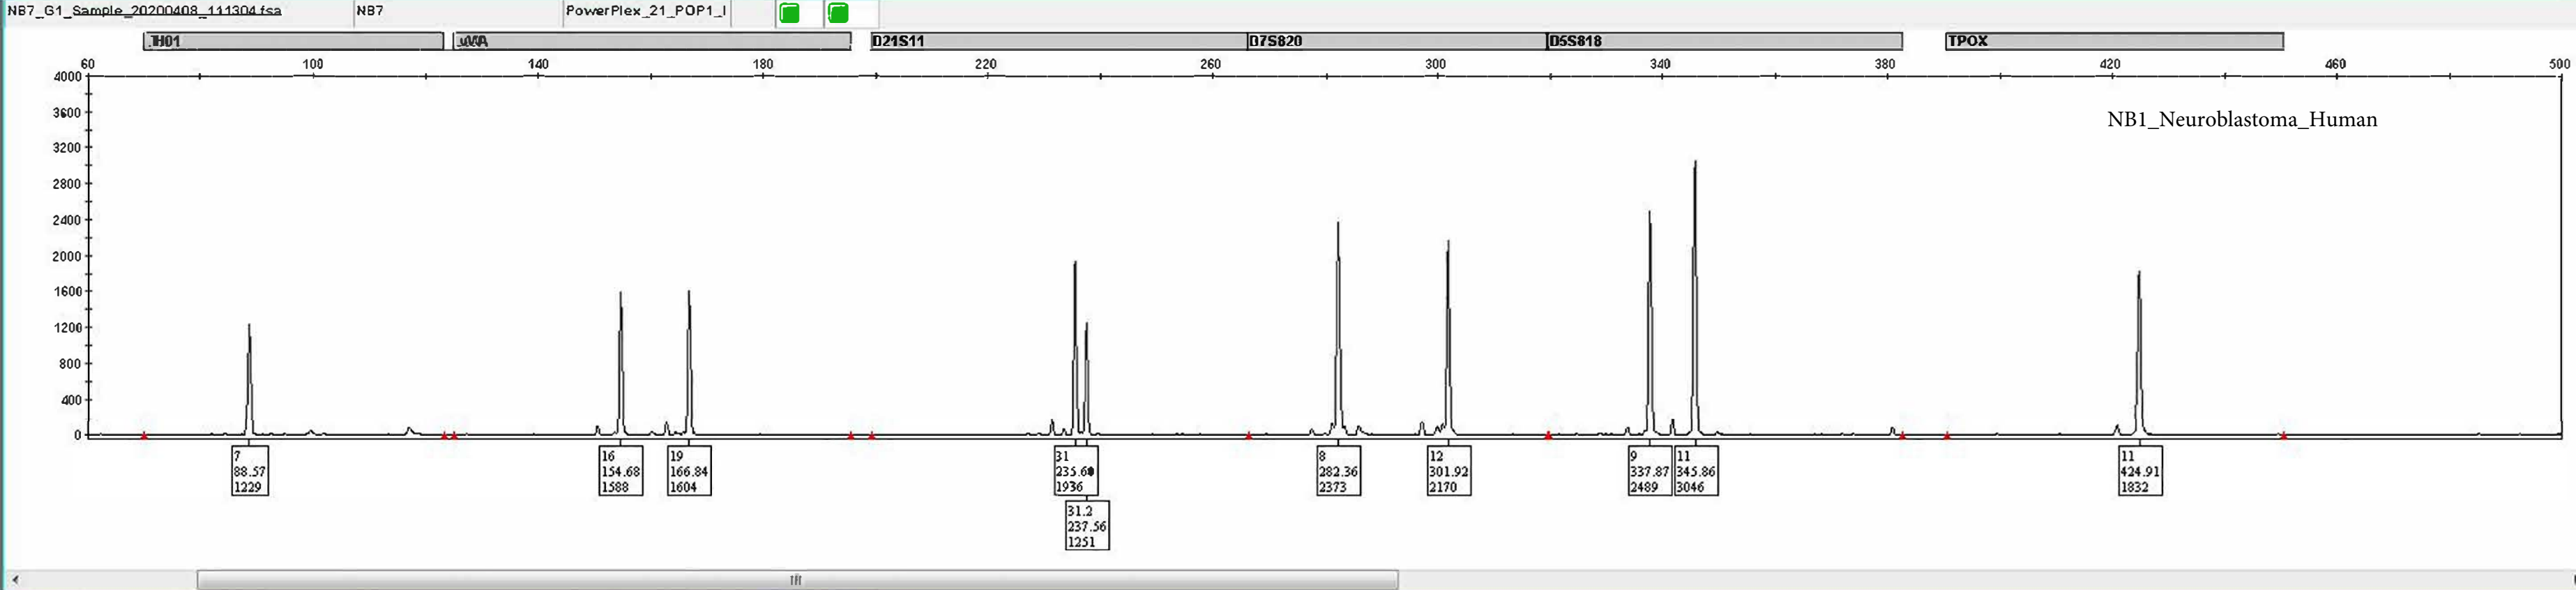

| Sample File | Sample Name | Panel | SQI | OS | SQ |
|-------------|-------------|-------|-----|----|----|
|-------------|-------------|-------|-----|----|----|

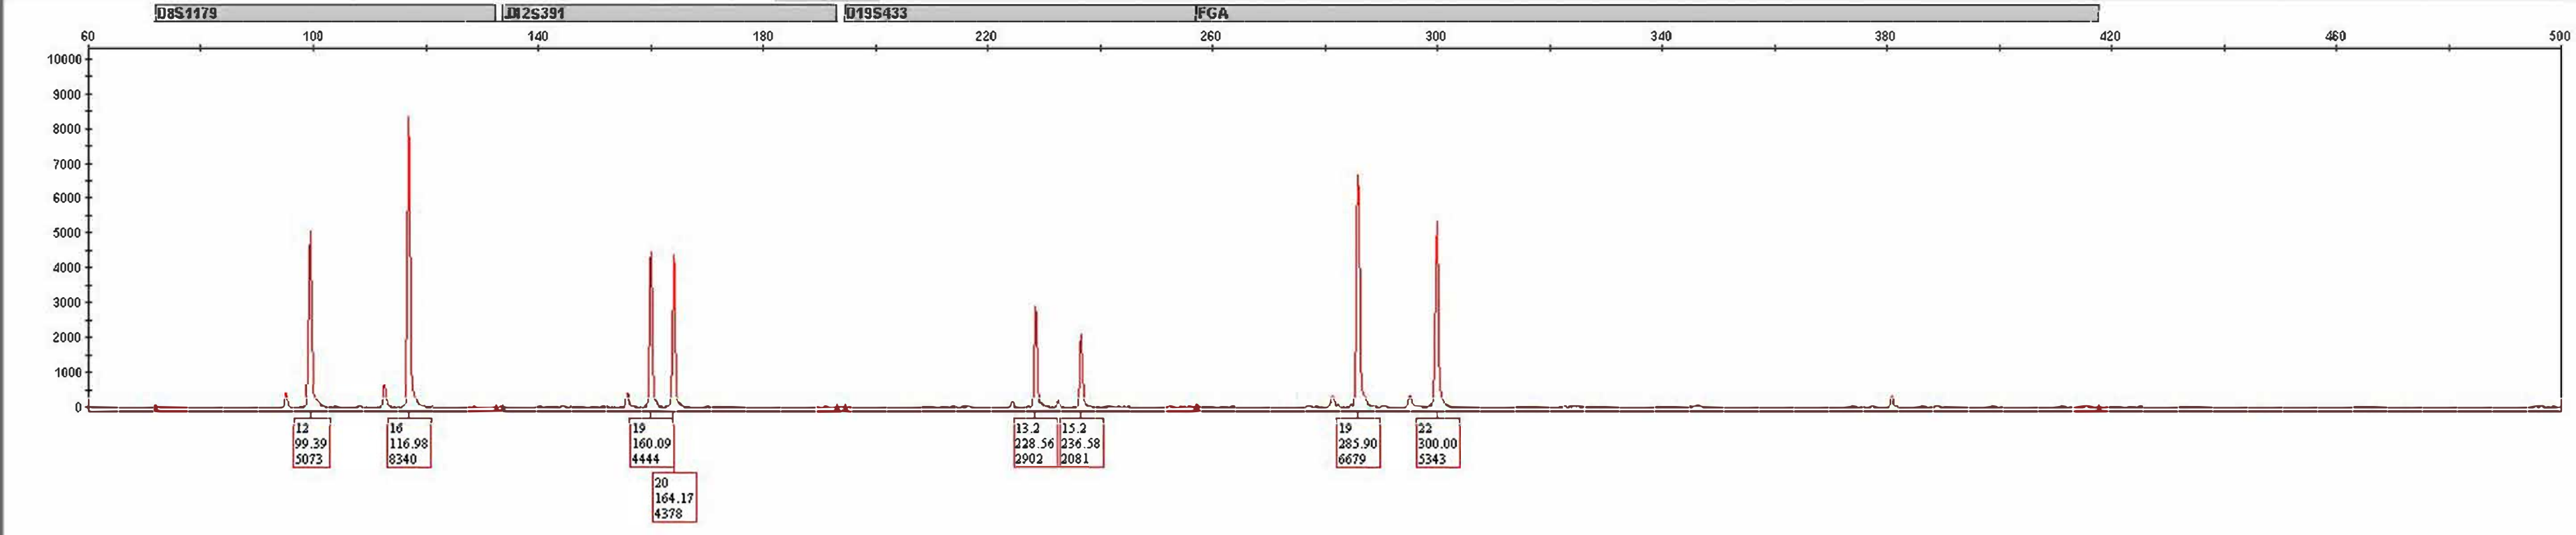

There are no controls in this selection

SH.SY5Y N+4\_C1\_Sample\_20200408\_103007.fsa SH.SY5Y N+4 PowerPlex\_21\_POP1\_I

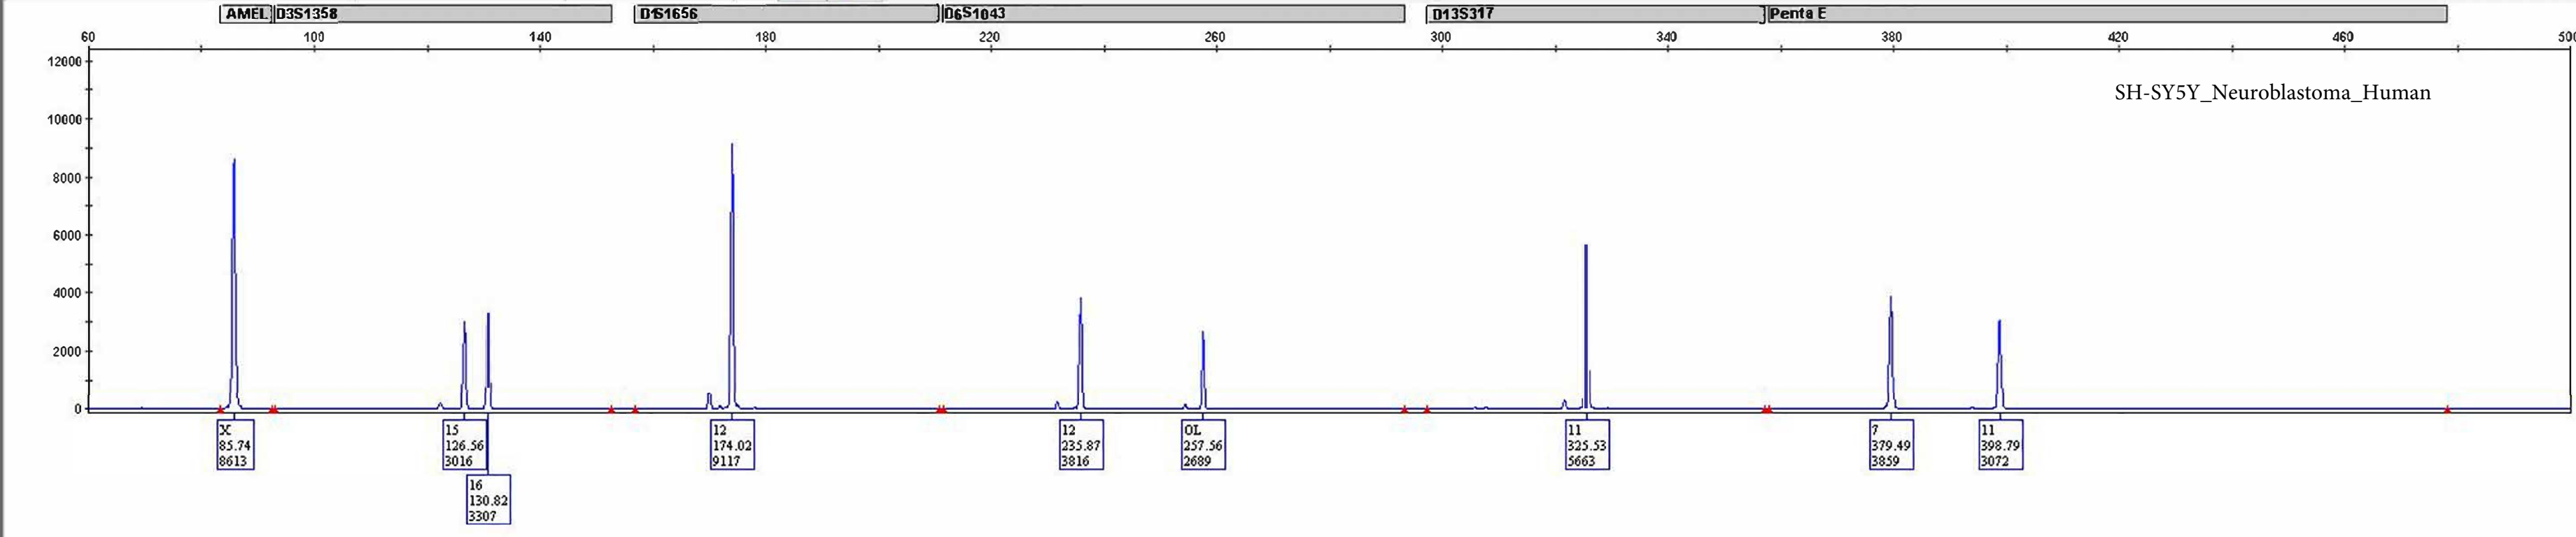

SH.SY5Y N+4\_C1\_Sample\_20200408\_103007.fsa SH.SY5Y N+4 PowerPlex\_21\_POP1\_I

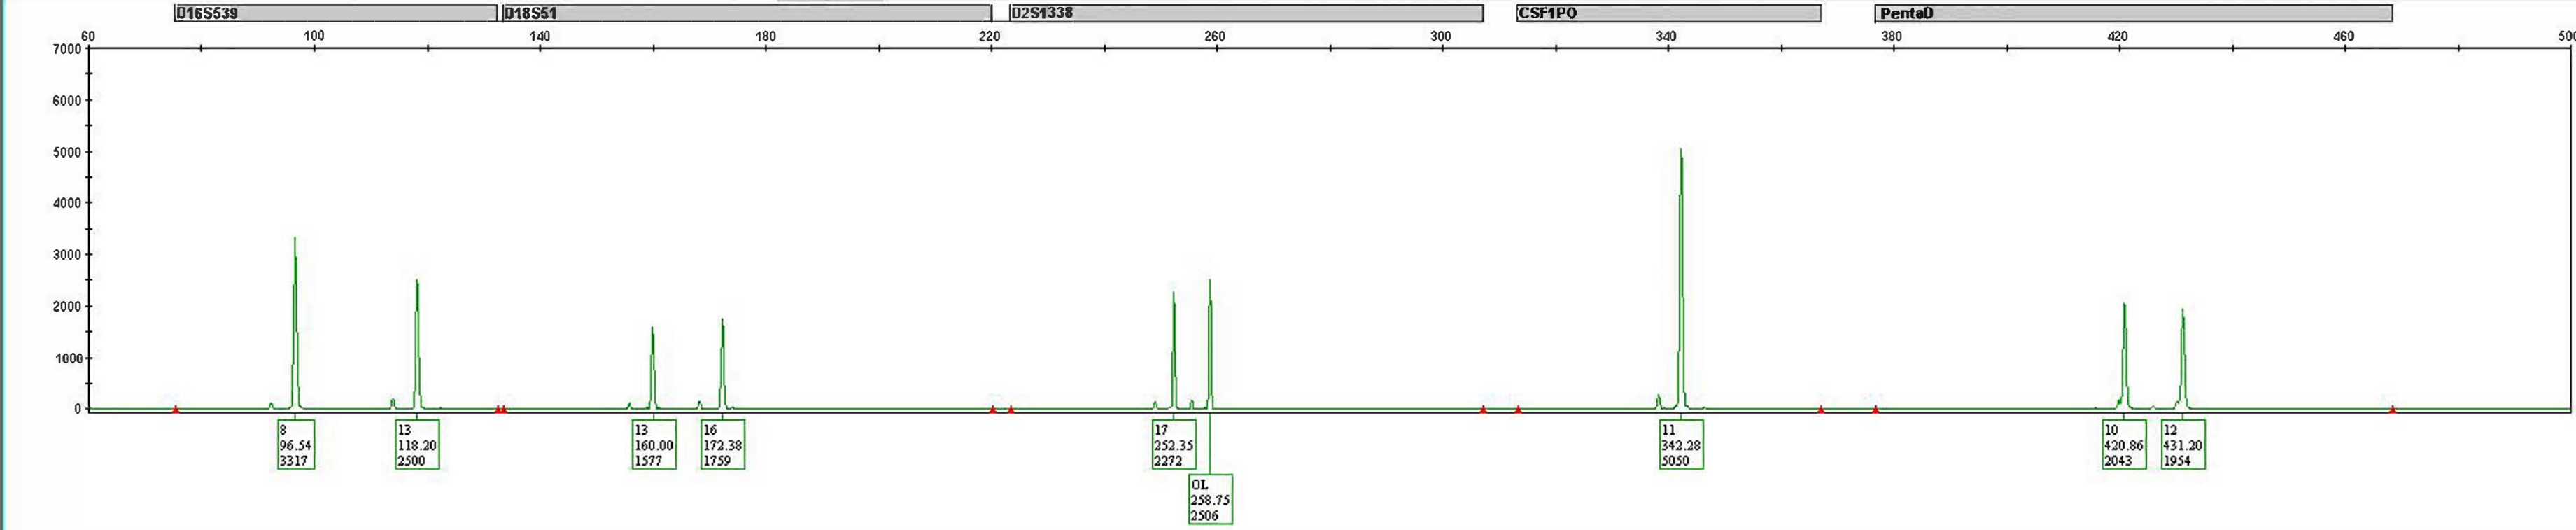

Plot Setting: PowerPlex21 Panes: 2

| Sample File | Sample Name | Panel | SQI | OS | SQ |
|-------------|-------------|-------|-----|----|----|
|-------------|-------------|-------|-----|----|----|

There are no controls in this selection

SH.SY5Y N+4\_C1\_Sample\_20200408\_103007.fsa SH.SY5Y N+4 PowerPlex\_21\_POP1\_I

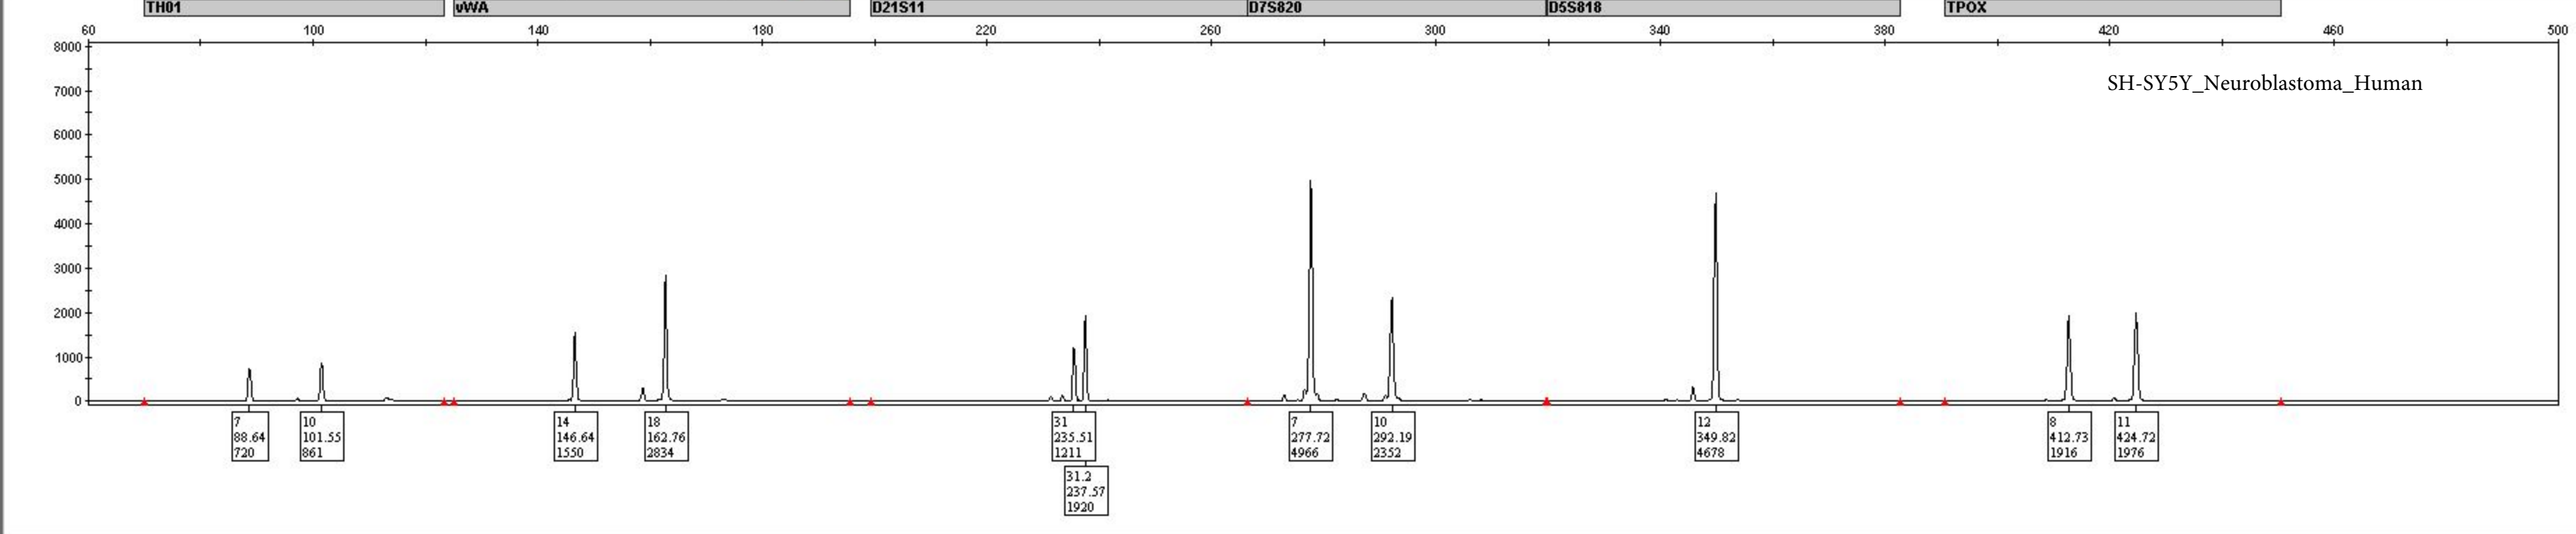

SH.SY5Y N+4\_C1\_Sample\_20200408\_103007.fsa SH.SY5Y N+4 PowerPlex\_21\_POP1\_I

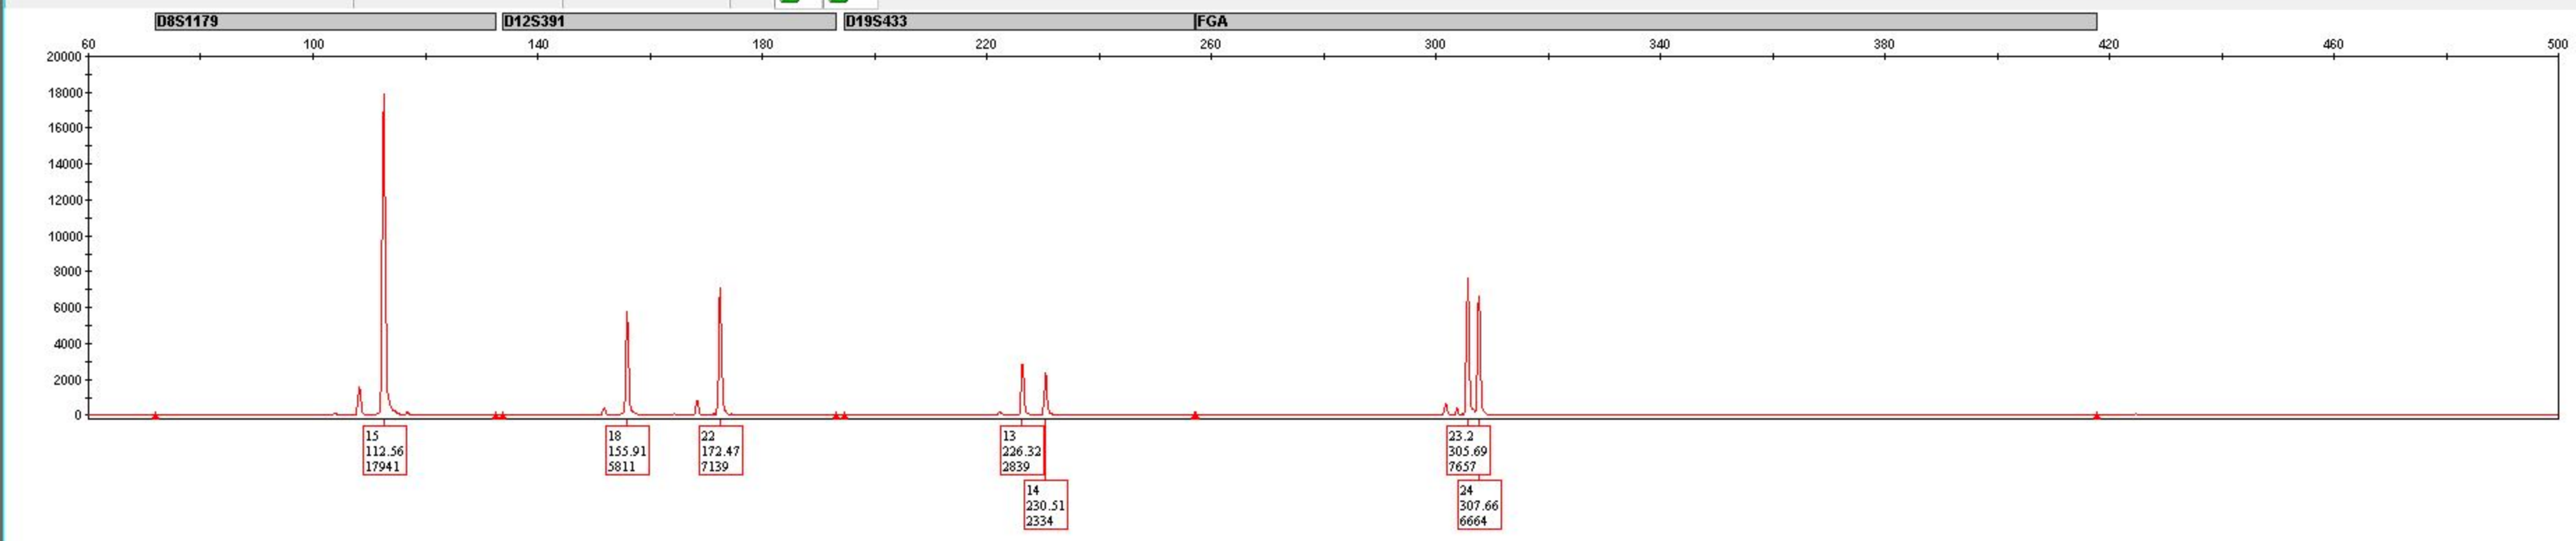

Plot Setting: PowerPlex21 Panes: 2

| Sample File | Sample Name | Panel | SQI | OS | SQ |
|-------------|-------------|-------|-----|----|----|
|-------------|-------------|-------|-----|----|----|

There are no controls in this selection

SK.N.DZ N+8\_B1\_Sample\_20200408\_103006.fsa SK.N.DZ N+8 PowerPlex\_21\_POP1\_I

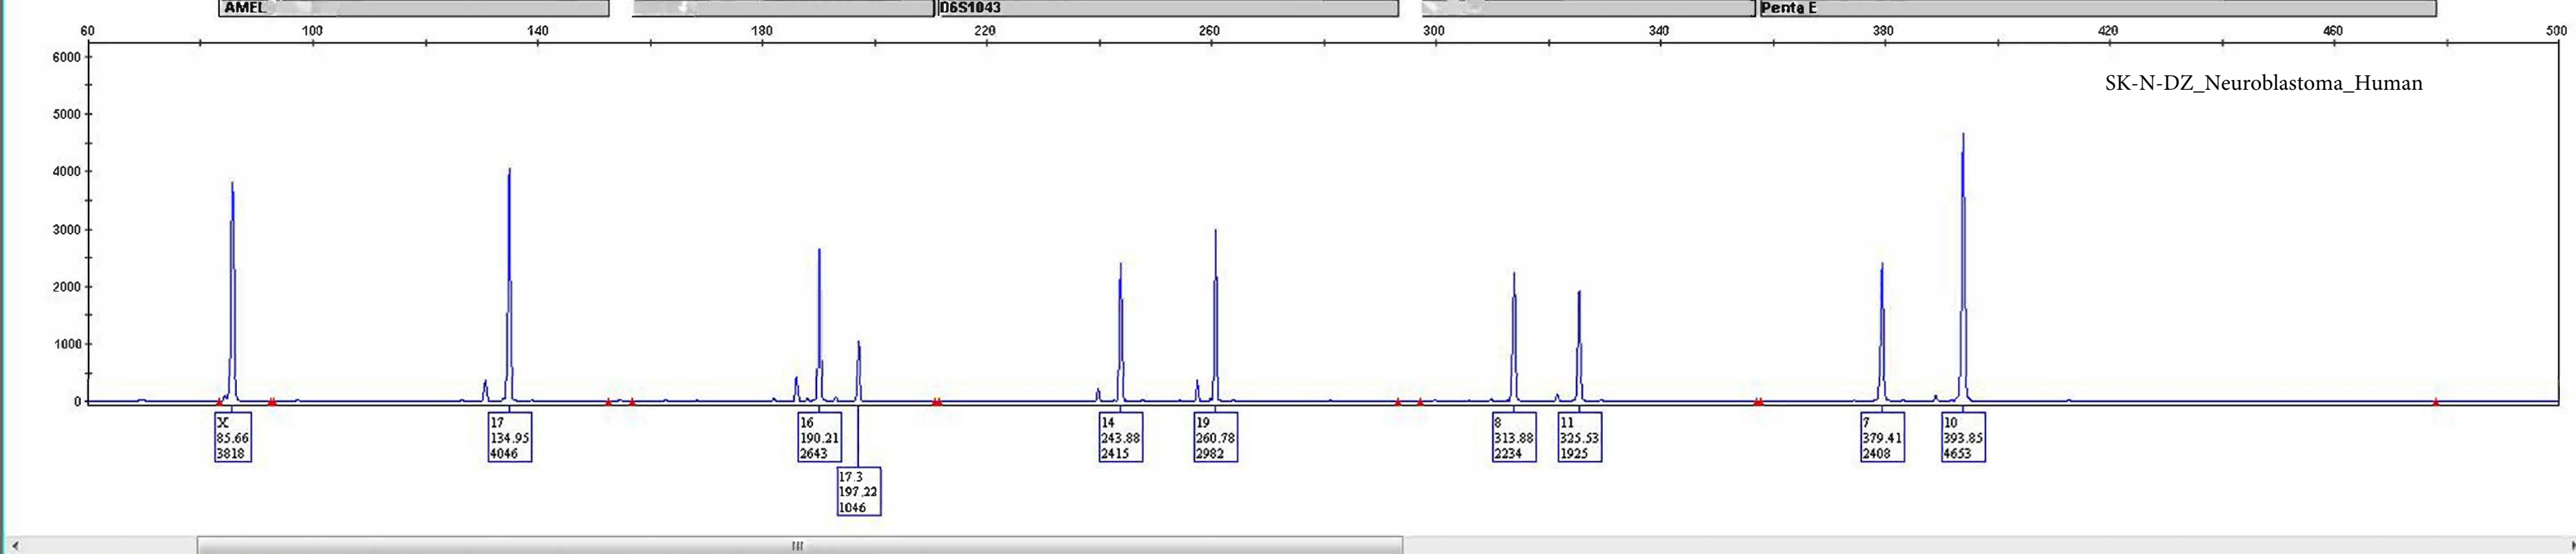

SK.N.DZ N+8\_B1\_Sample\_20200408\_103006.fsa SK.N.DZ N+8 PowerPlex\_21\_POP1\_I

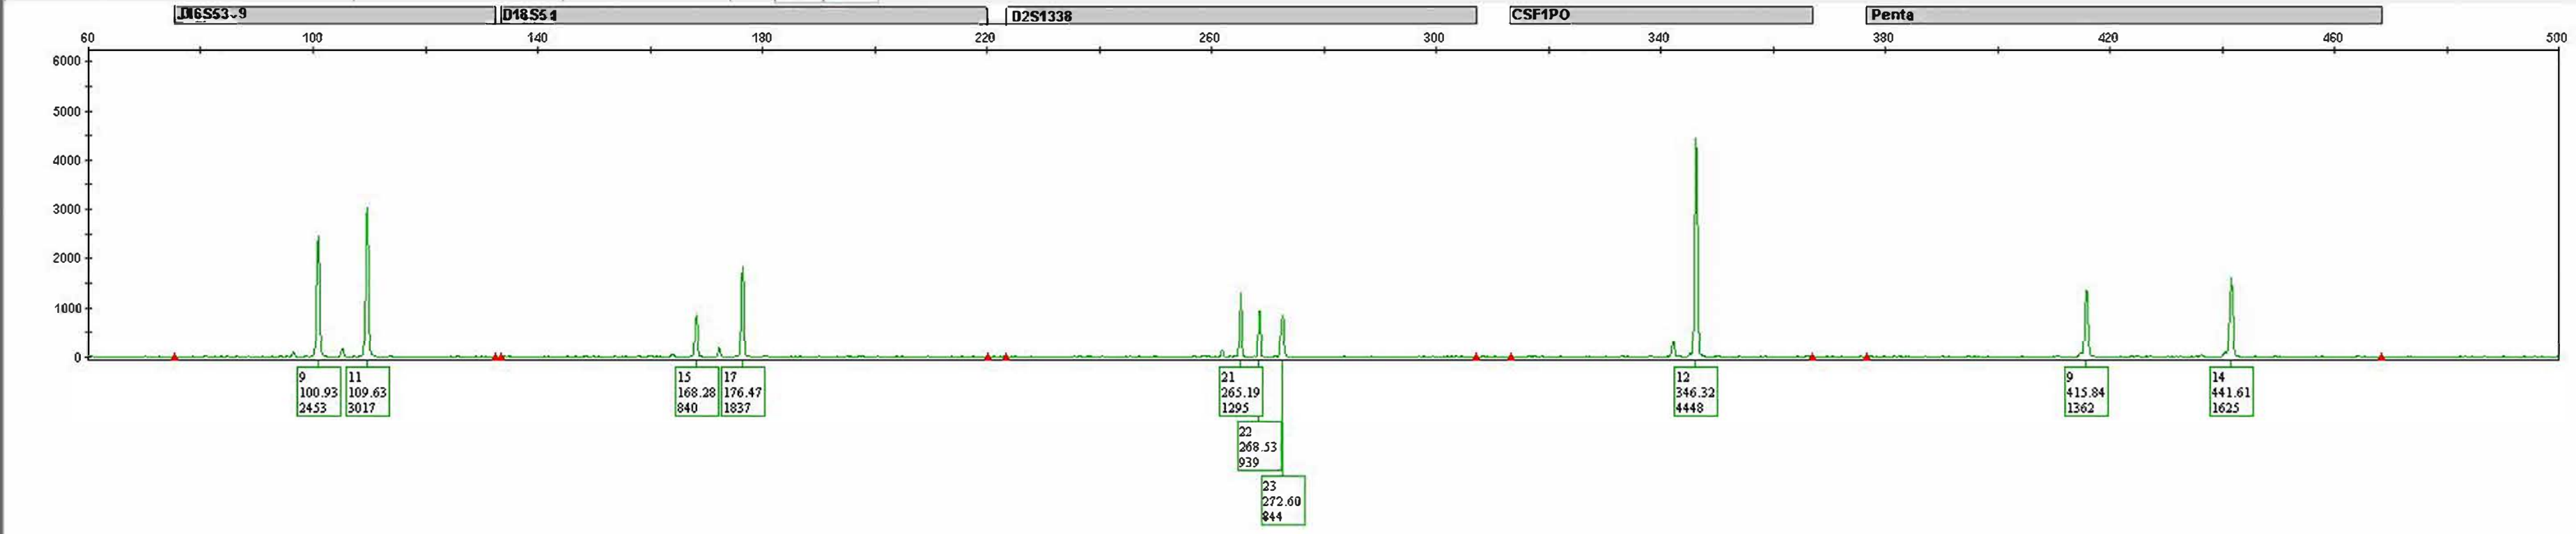

Plot Setting: PowerPlex21 Panes: 2

| Sample File | Sample Name | Panel | SQI | OS | SQ |
|-------------|-------------|-------|-----|----|----|
|-------------|-------------|-------|-----|----|----|

There are no controls in this selection

SK.N.DZ N+8\_B1\_Sample\_20200408\_103006.fsa SK.N.DZ N+8 PowerPlex\_21\_POP1\_I

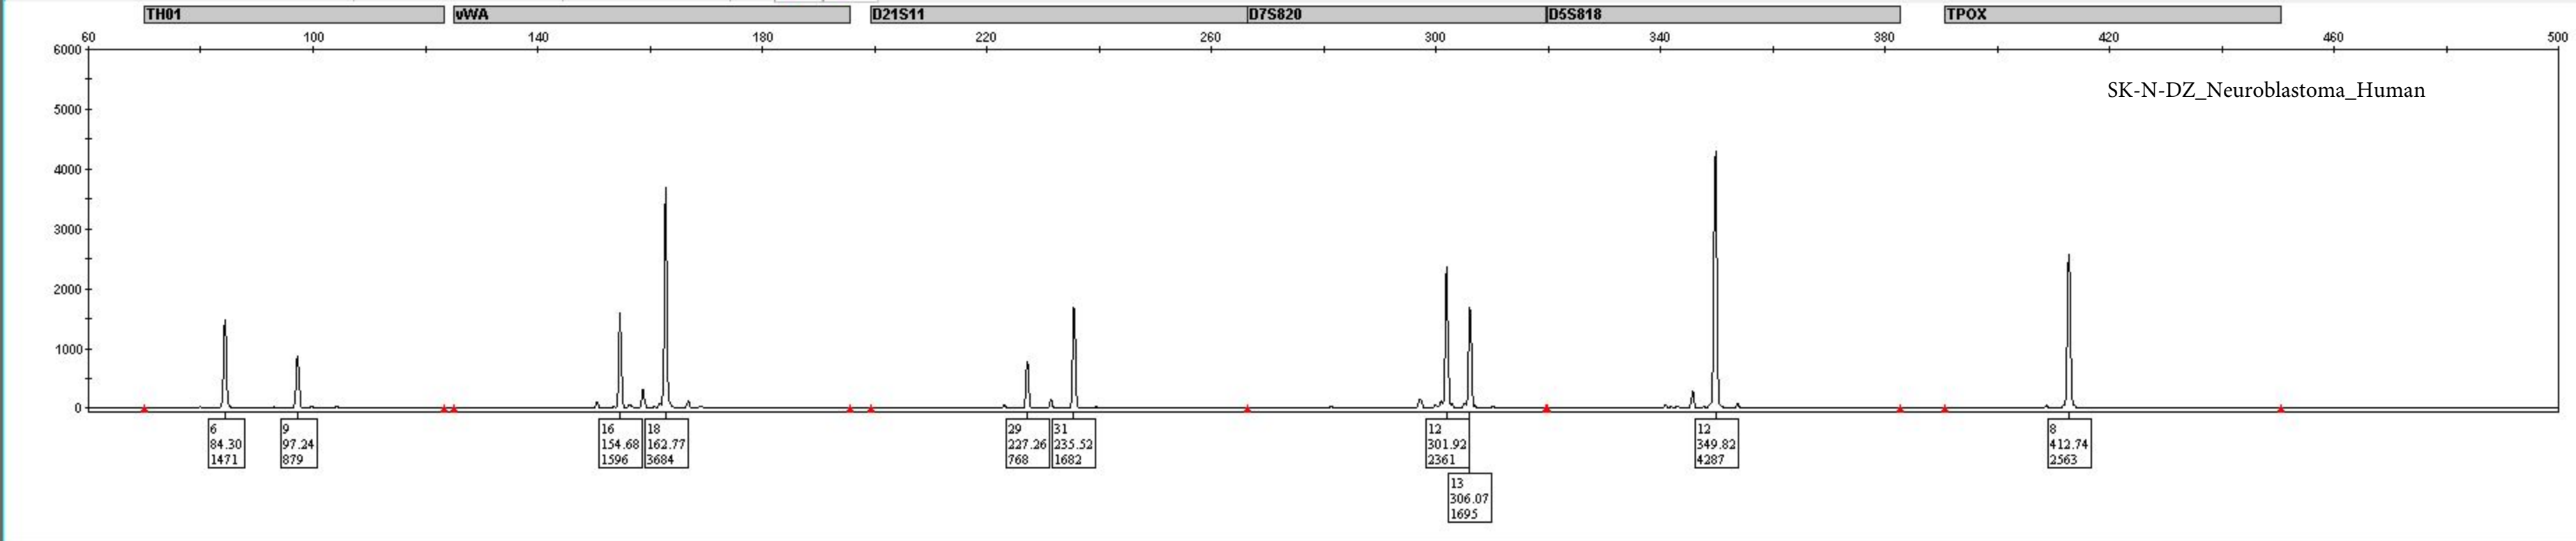

SK.N.DZ N+8\_B1\_Sample\_20200408\_103006.fsa SK.N.DZ N+8 PowerPlex\_21\_POP1\_I

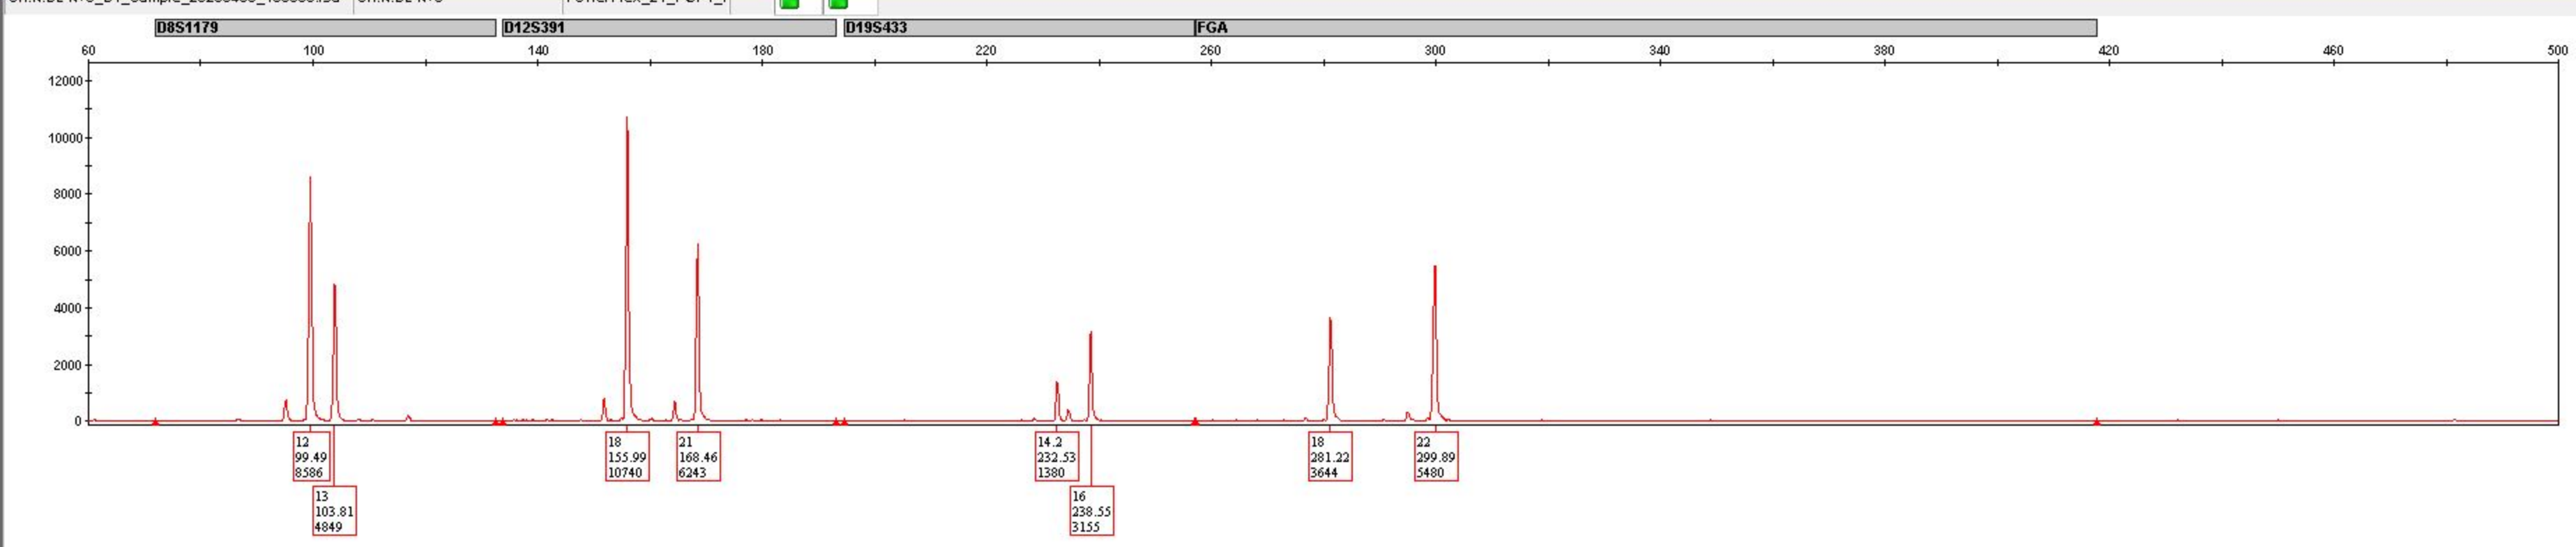

There are no controls in this selection

SK.N.FI N+4\_D1\_Sample\_20200408\_103008.fsa SK.N.FI N+4 PowerPlex\_21\_POP1\_I

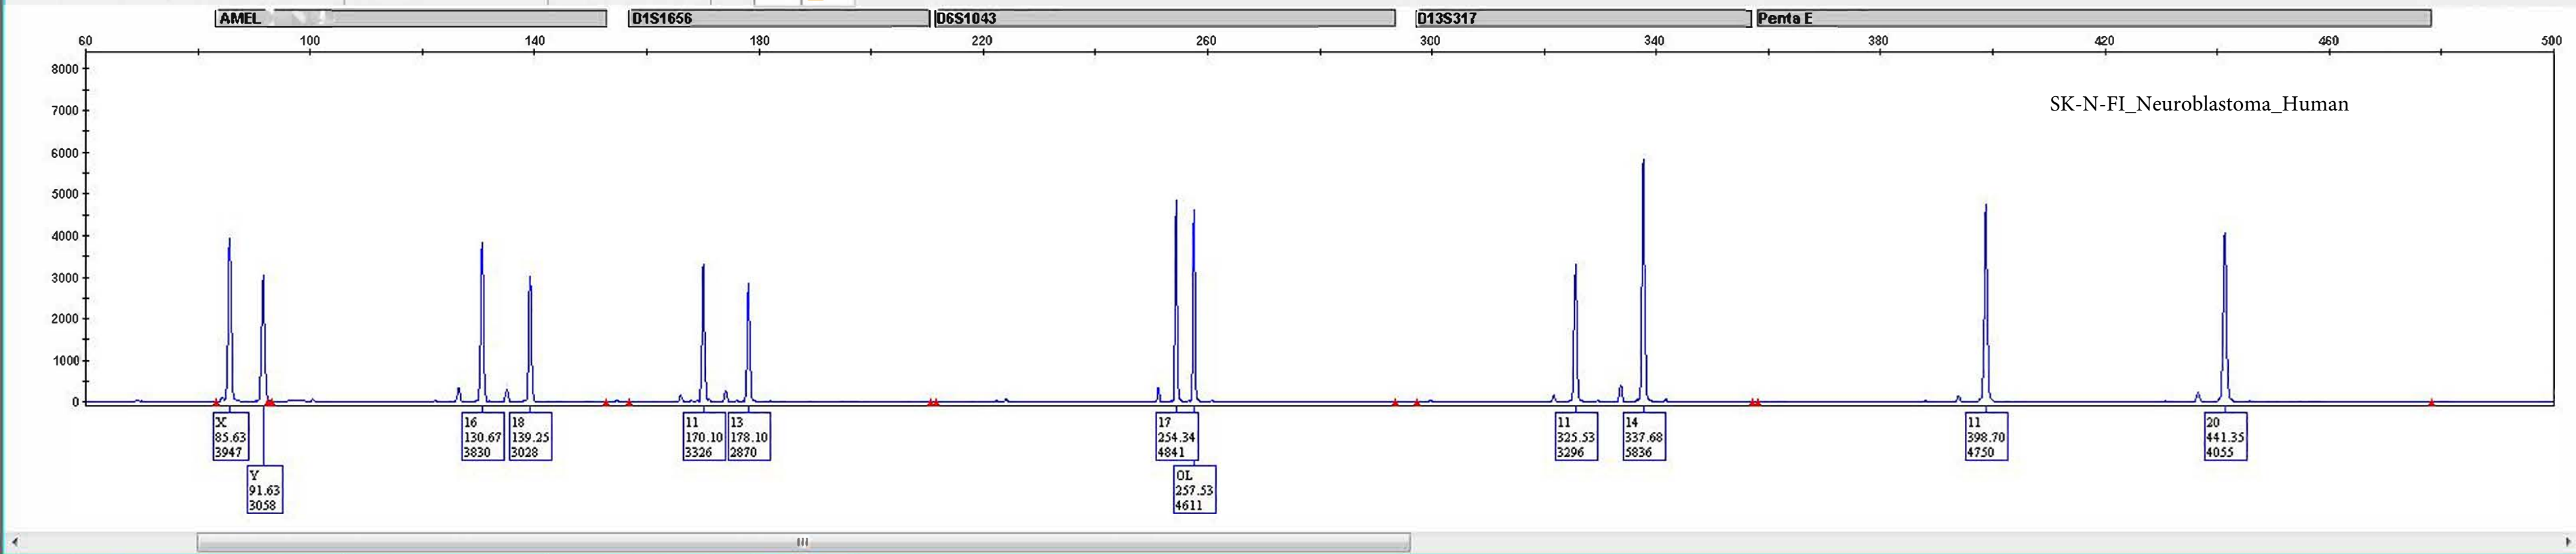

SK.N.FI N+4\_D1\_Sample\_20200408\_103008.fsa SK.N.FI N+4 PowerPlex\_21\_POP1\_I

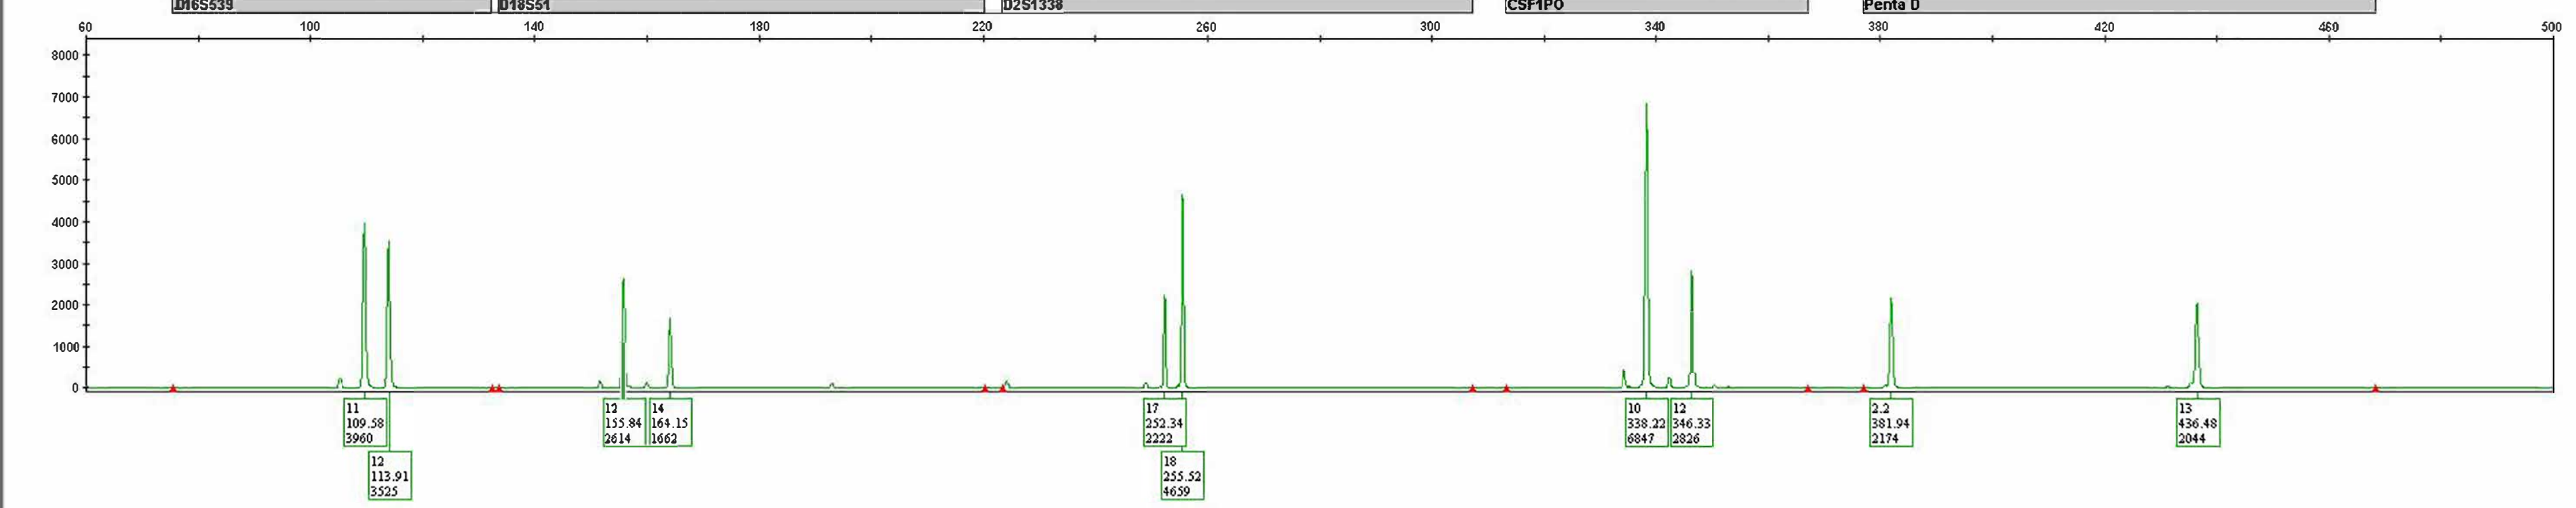

[There are no controls in this selection]

SK.N.FI N+4\_D1\_Sample\_20200408\_103008.fsa SK.N.FI N+4 PowerPlex\_21\_POP1\_I

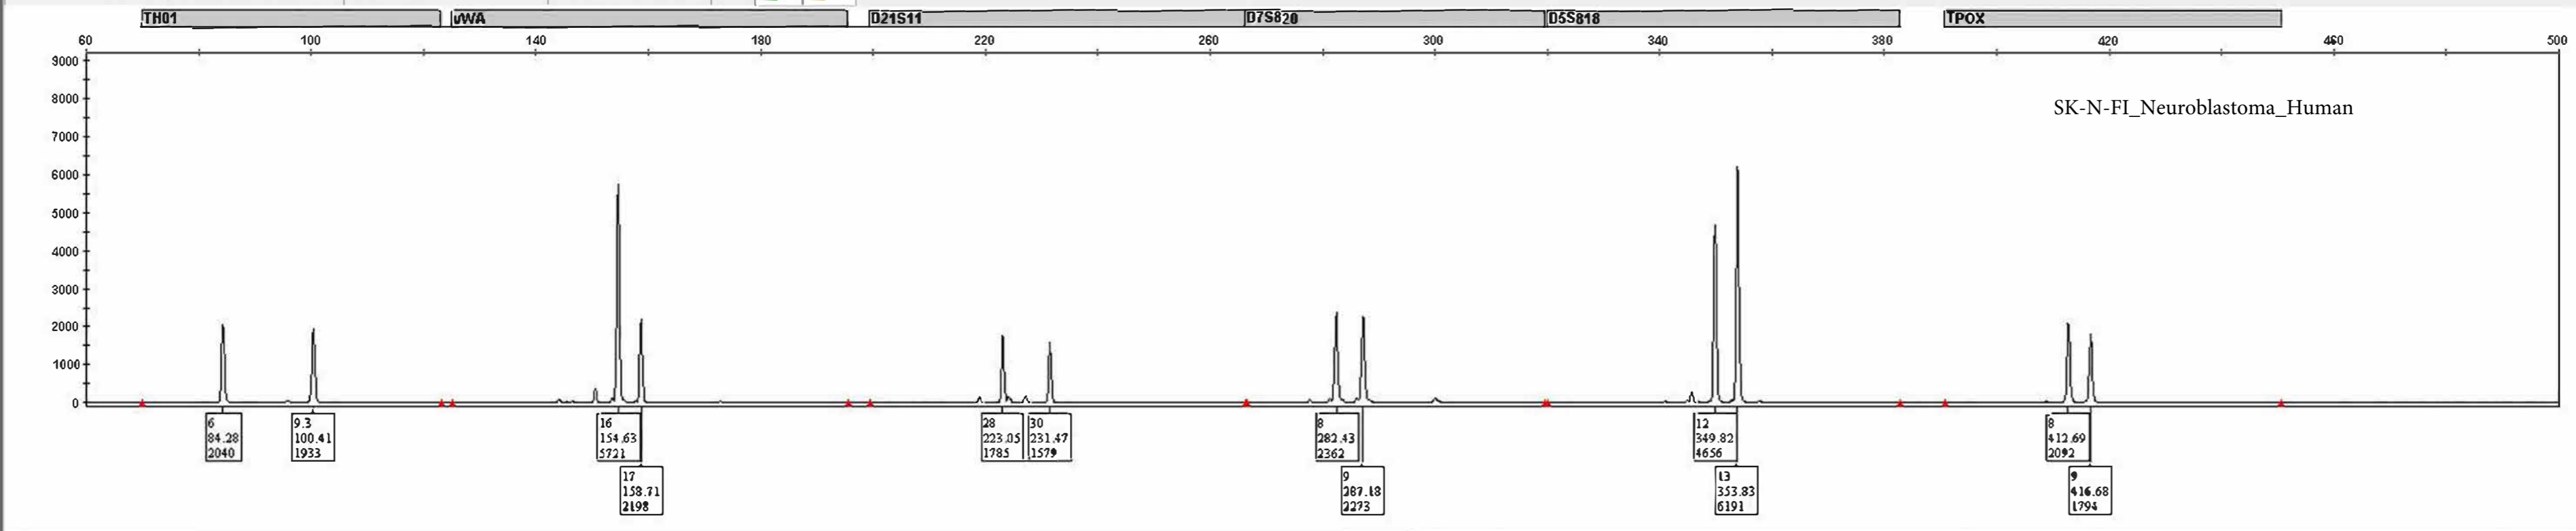

SK.N.FI N+4\_D1\_Sample\_20200408\_103008.fsa SK.N.FI N+4 PowerPlex\_21\_POP1\_I

D8S1179 D12S391 D19S433 FGA

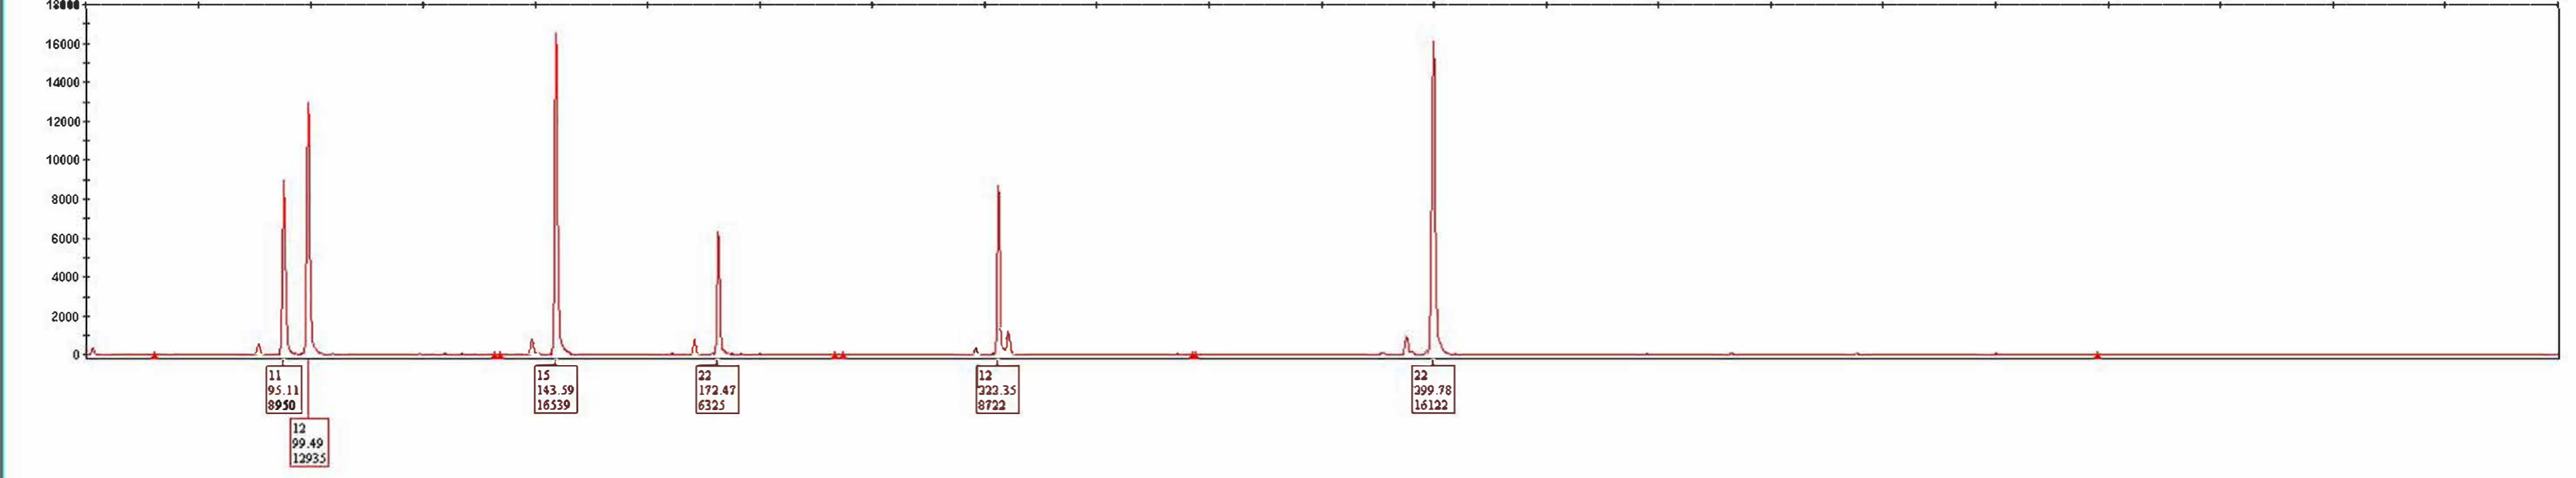



Plot Setting: PowerPlex21 Panes: 2

| Sample File | Sample Name | Panel | SQI | OS | SQ |
|-------------|-------------|-------|-----|----|----|
|-------------|-------------|-------|-----|----|----|

There are no controls in this selection

SK.N.SH N+3\_E1\_Sample\_20200408\_111302.fsa SK.N.SH N+3 PowerPlex\_21\_POP1\_I

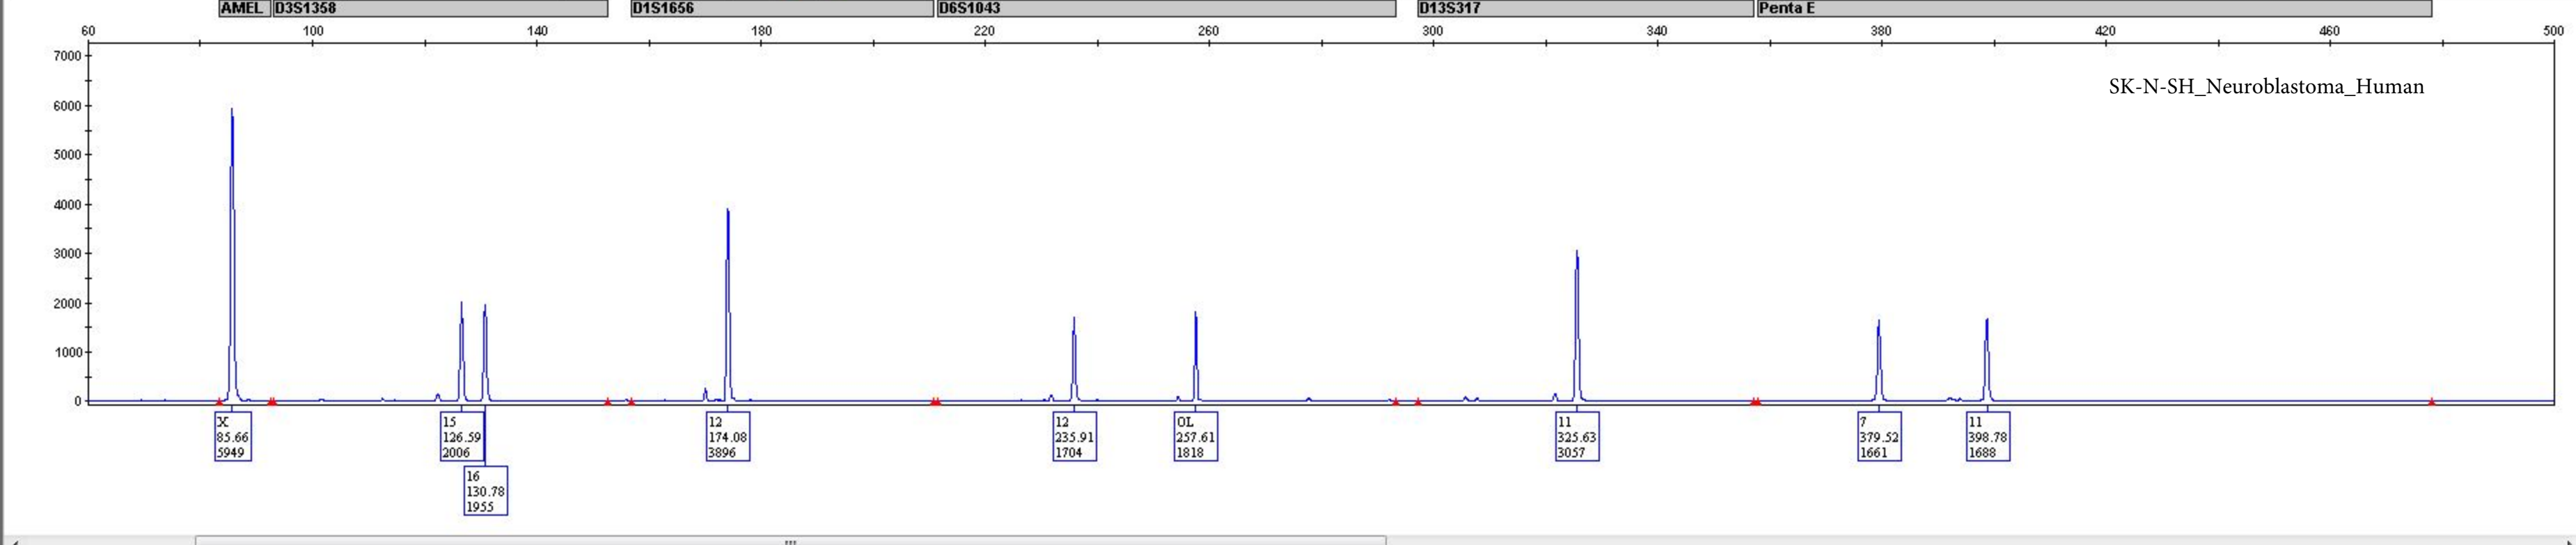

SK.N.SH N+3\_E1\_Sample\_20200408\_111302.fsa SK.N.SH N+3 PowerPlex\_21\_POP1\_I

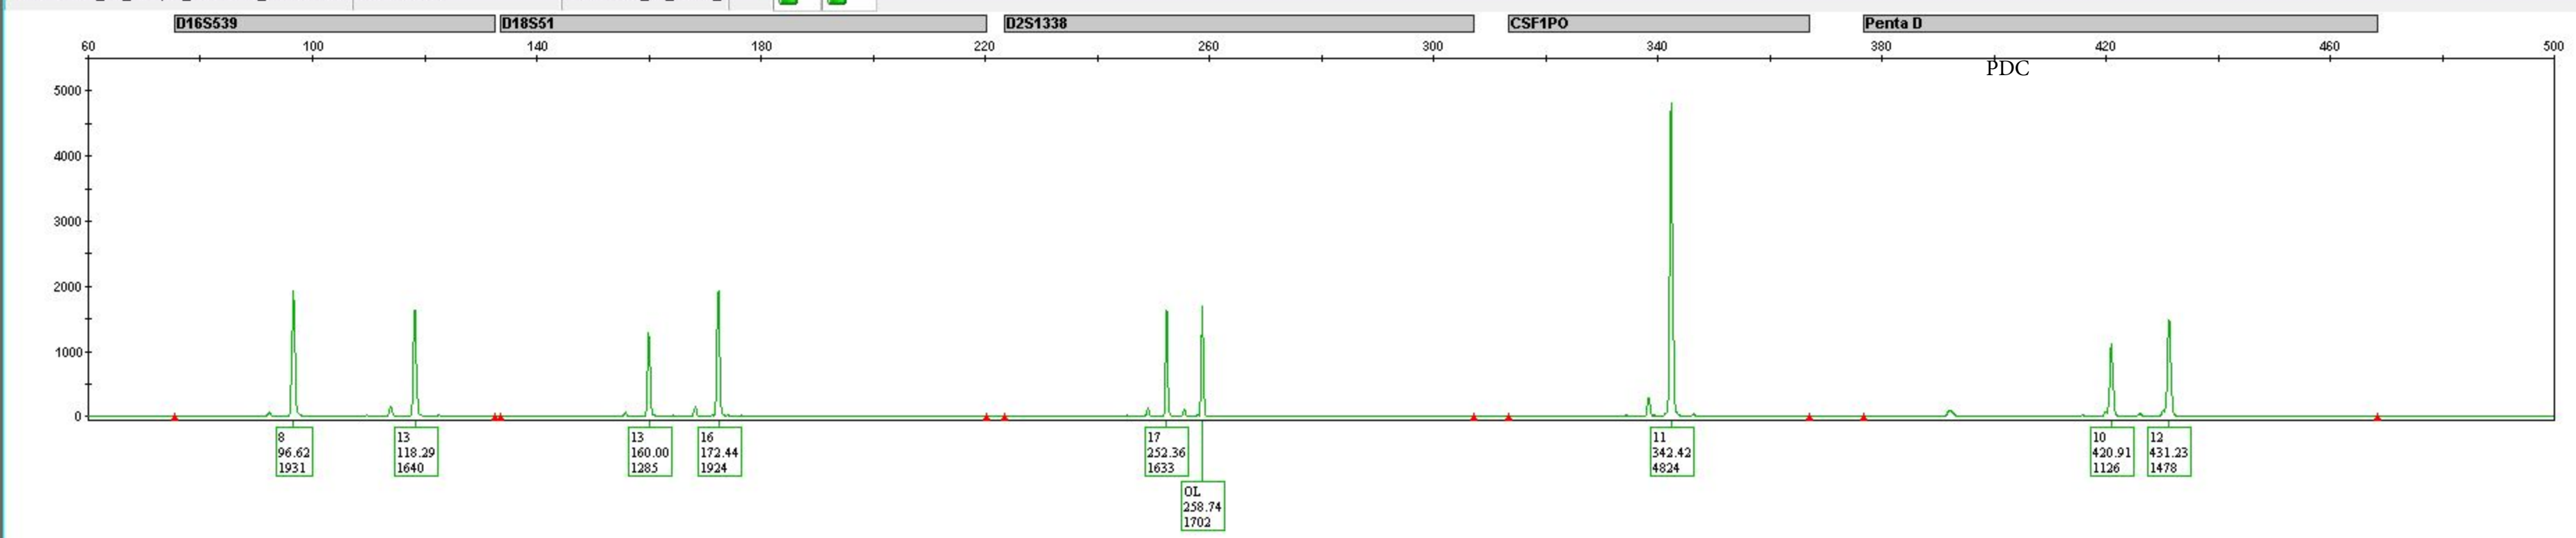

Plot Setting: PowerPlex21 Panes: 2

| Sample File | Sample Name | Panel | SQI | OS | SQ |
|-------------|-------------|-------|-----|----|----|
|-------------|-------------|-------|-----|----|----|

There are no controls in this selection

SK.N.SH N+3\_E1\_Sample\_20200408\_111302.fsa SK.N.SH N+3 PowerPlex\_21\_POP1\_I

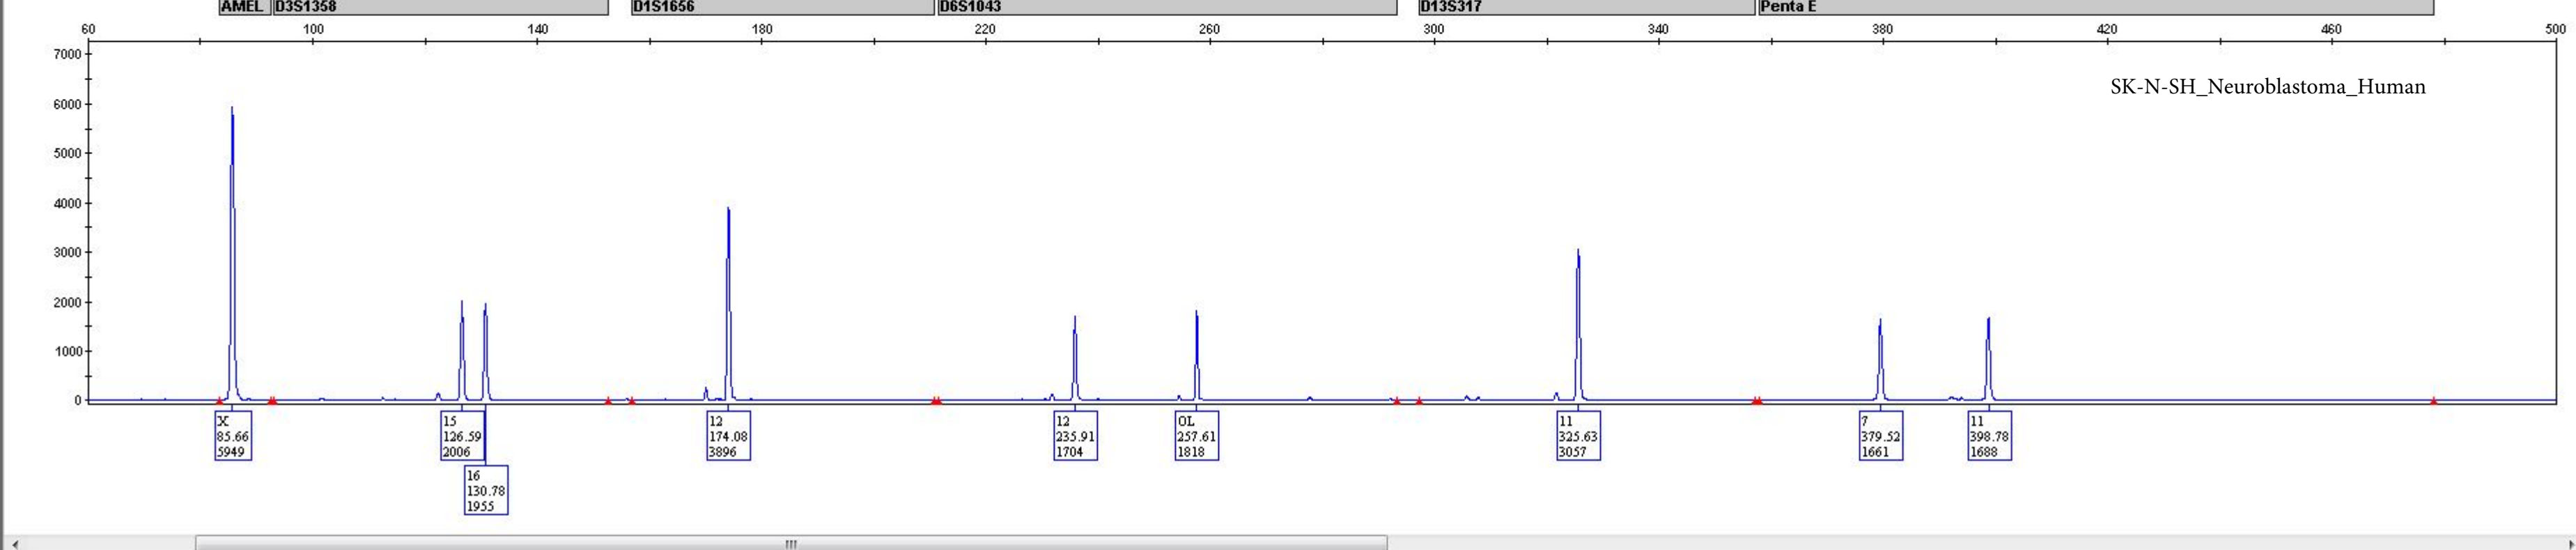

SK.N.SH N+3\_E1\_Sample\_20200408\_111302.fsa SK.N.SH N+3 PowerPlex\_21\_POP1\_I

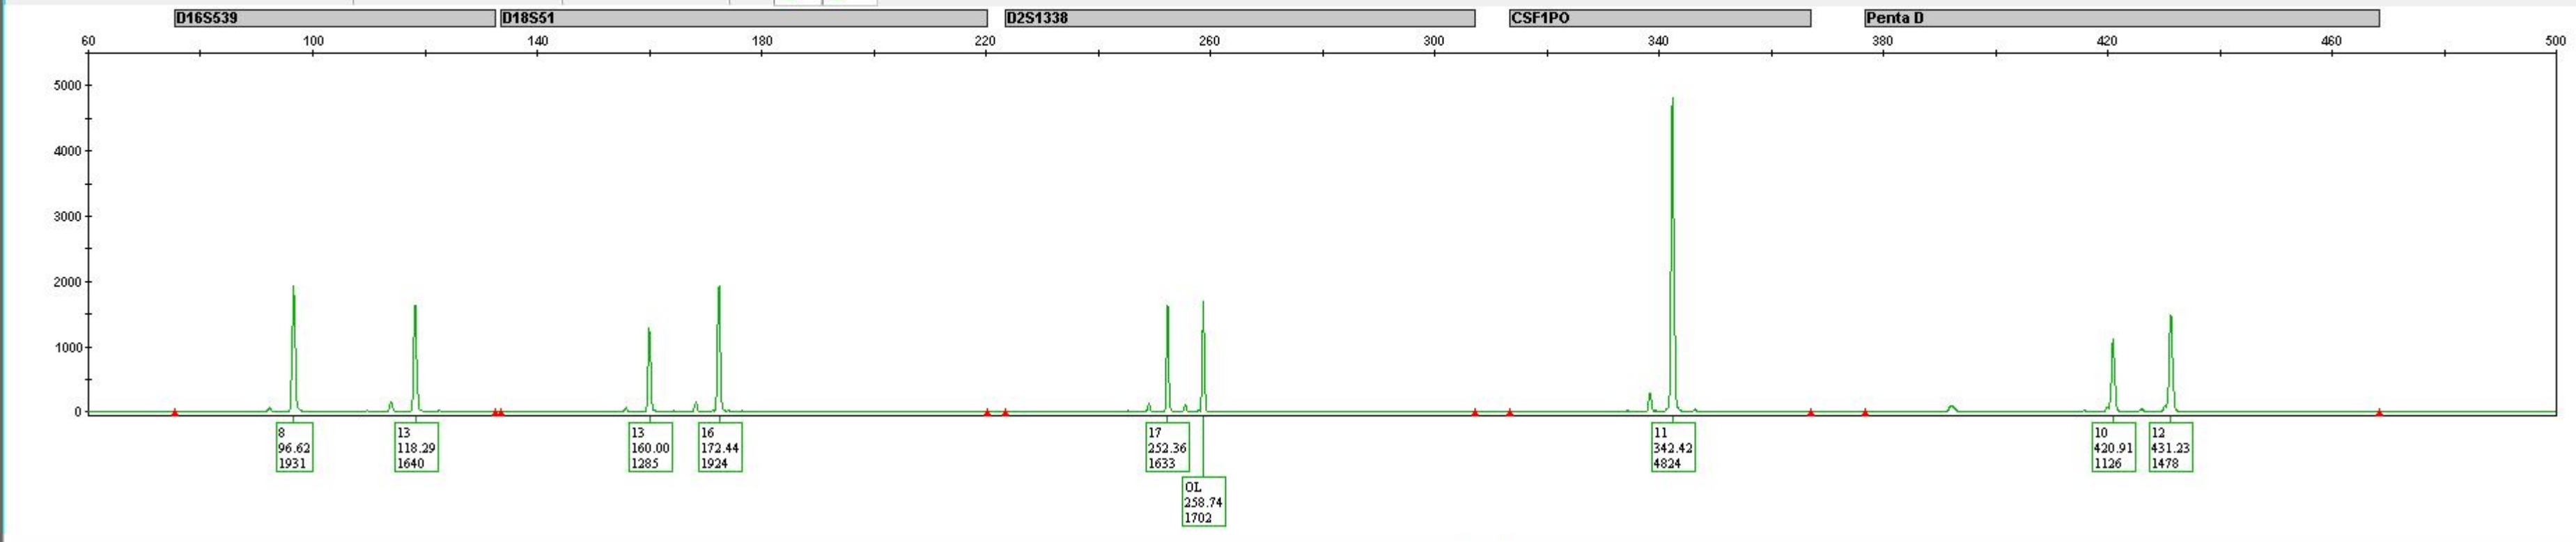

Supplement: CAS-111-3780-s012.pdf [file CAS-111-3780-s012.pdf]
